# Supplementary material
Source: PubMed Central journal article supplement (PMC2845465)

MS/MS Fragmentation of **GFETPASSRIN**

Found in **XP\_001176287**, PREDICTED: hypothetical protein [Strongylocentrotus purpuratus].

Match to Query 415: 1177.587888 from(589.801220,2+) intensity(394140.0000)

Title: Cmpd 101, +MSn(589.7772), 24.4 min

Data file Qtof\_all.mgf

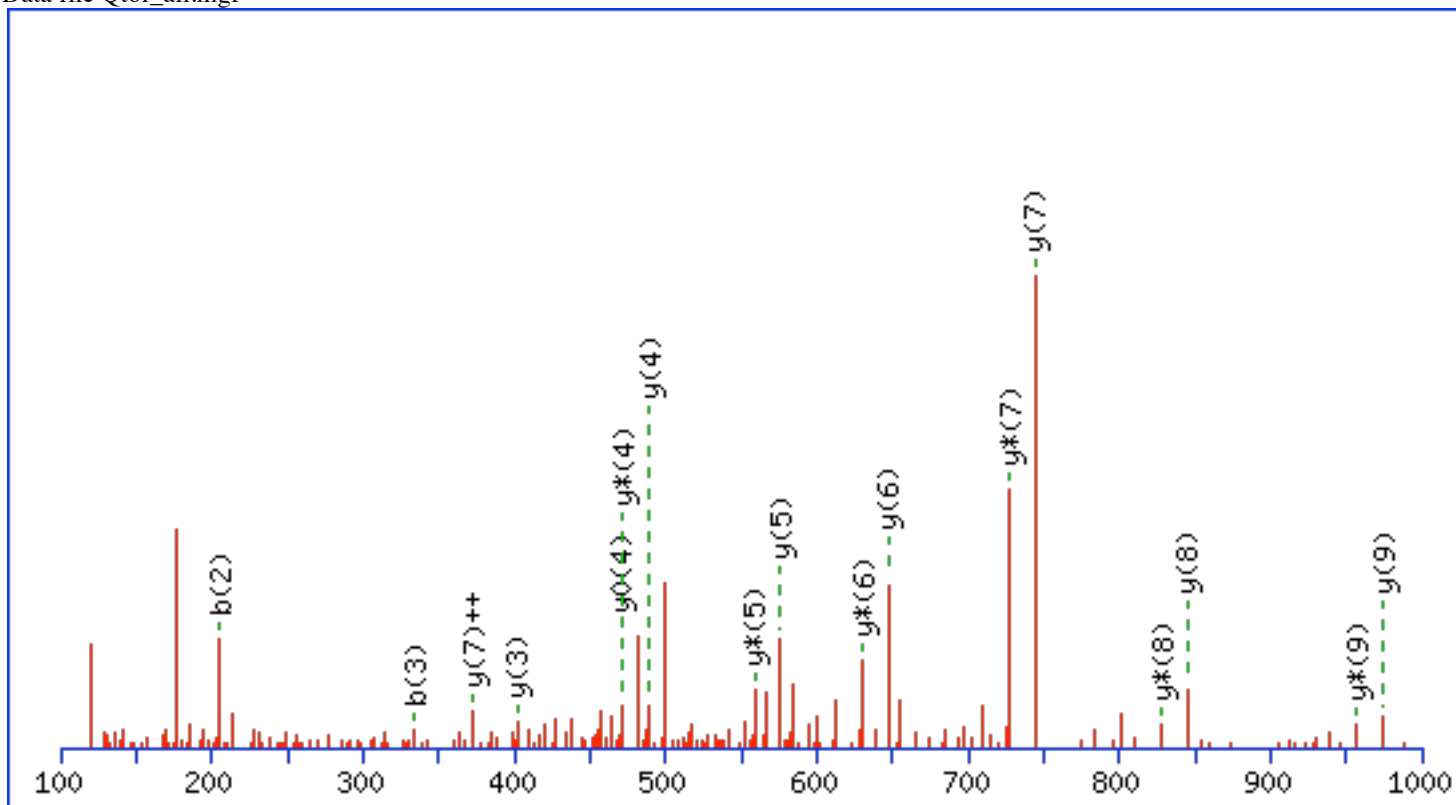

**Monoisotopic mass of neutral peptide Mr(calc): 1177.5727 Ions Score: 43 Expect: 0.76 Matches (Bold Red): 17/94**  
 fragment ions using 38 most intense peaks

| # | b | b <sup>++</sup> | b <sup>*</sup> | b <sup>+++</sup> | b <sup>0</sup> | b <sup>0++</sup> | Seq. | y | y <sup>++</sup> | y <sup>*</sup> | y <sup>+++</sup> | y <sup>0</sup> | y <sup>0++</sup> | # |
|---|---|-----------------|----------------|------------------|----------------|------------------|------|---|-----------------|----------------|------------------|----------------|------------------|---|
|---|---|-----------------|----------------|------------------|----------------|------------------|------|---|-----------------|----------------|------------------|----------------|------------------|---|

|    |                 |          |           |          |           |          |  |          |                 |                 |                 |          |                 |          |  |           |
|----|-----------------|----------|-----------|----------|-----------|----------|--|----------|-----------------|-----------------|-----------------|----------|-----------------|----------|--|-----------|
| 1  | 58.0287         | 29.5180  |           |          |           |          |  | <b>G</b> |                 |                 |                 |          |                 |          |  | <b>11</b> |
| 2  | <b>205.0972</b> | 103.0522 |           |          |           |          |  | <b>F</b> | 1121.5586       | 561.2829        | 1104.5320       | 552.7696 | 1103.5480       | 552.2776 |  | <b>10</b> |
| 3  | <b>334.1397</b> | 167.5735 |           |          | 316.1292  | 158.5682 |  | <b>E</b> | <b>974.4901</b> | 487.7487        | <b>957.4636</b> | 479.2354 | 956.4796        | 478.7434 |  | <b>9</b>  |
| 4  | 435.1874        | 218.0974 |           |          | 417.1769  | 209.0921 |  | <b>T</b> | <b>845.4476</b> | 423.2274        | <b>828.4210</b> | 414.7141 | 827.4370        | 414.2221 |  | <b>8</b>  |
| 5  | 532.2402        | 266.6237 |           |          | 514.2296  | 257.6185 |  | <b>P</b> | <b>744.3999</b> | <b>372.7036</b> | <b>727.3733</b> | 364.1903 | 726.3893        | 363.6983 |  | <b>7</b>  |
| 6  | 603.2773        | 302.1423 |           |          | 585.2667  | 293.1370 |  | <b>A</b> | <b>647.3471</b> | 324.1772        | <b>630.3206</b> | 315.6639 | 629.3365        | 315.1719 |  | <b>6</b>  |
| 7  | 690.3093        | 345.6583 |           |          | 672.2988  | 336.6530 |  | <b>S</b> | <b>576.3100</b> | 288.6586        | <b>559.2834</b> | 280.1454 | 558.2994        | 279.6534 |  | <b>5</b>  |
| 8  | 777.3414        | 389.1743 |           |          | 759.3308  | 380.1690 |  | <b>S</b> | <b>489.2780</b> | 245.1426        | <b>472.2514</b> | 236.6293 | <b>471.2674</b> | 236.1373 |  | <b>4</b>  |
| 9  | 933.4425        | 467.2249 | 916.4159  | 458.7116 | 915.4319  | 458.2196 |  | <b>R</b> | <b>402.2459</b> | 201.6266        | 385.2194        | 193.1133 |                 |          |  | <b>3</b>  |
| 10 | 1046.5265       | 523.7669 | 1029.5000 | 515.2536 | 1028.5160 | 514.7616 |  | <b>I</b> | 246.1448        | 123.5761        | 229.1183        | 115.0628 |                 |          |  | <b>2</b>  |
| 11 |                 |          |           |          |           |          |  | <b>N</b> | 133.0608        | 67.0340         | 116.0342        | 58.5207  |                 |          |  | <b>1</b>  |

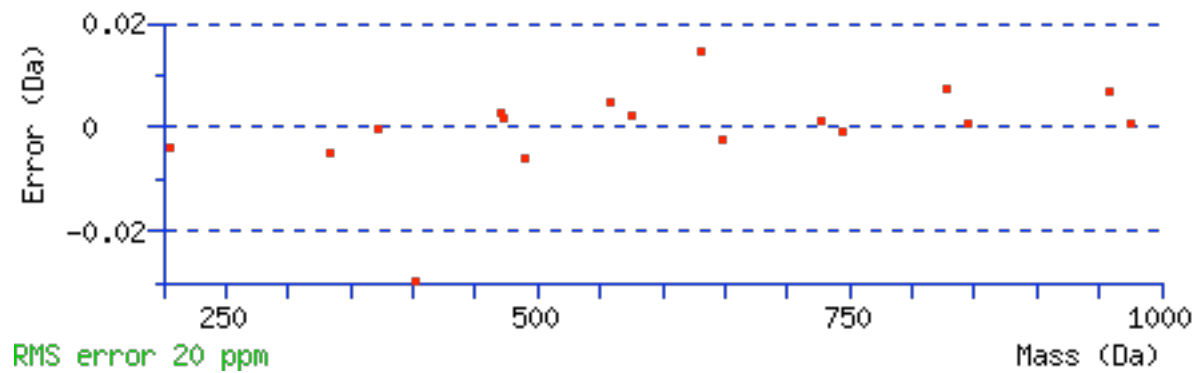

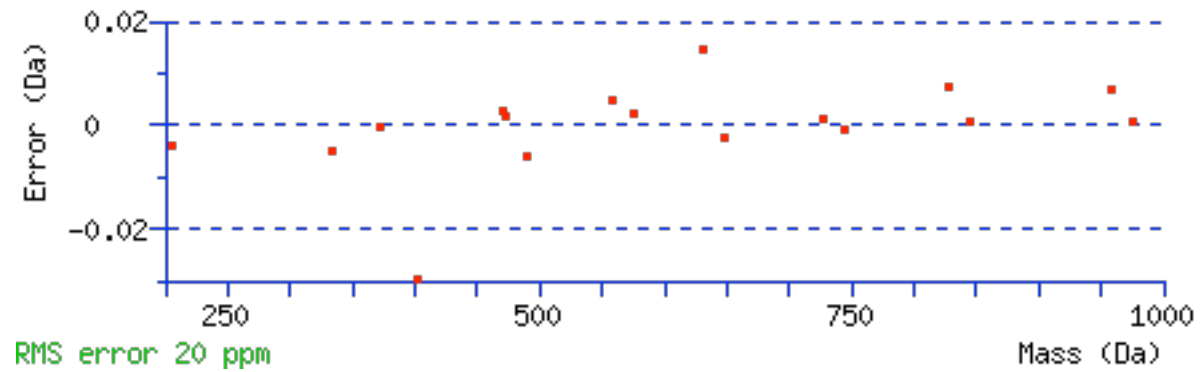

MS/MS Fragmentation of **GFETPASSRINS**

Found in **XP\_001176287**, PREDICTED: hypothetical protein [Strongylocentrotus purpuratus].

Match to Query 466: 1264.636128 from(633.325340,2+) intensity(1458960.0000)

Title: Cmpd 104, +MSn(633.7875), 24.7 min

Data file Qtof\_all.mgf

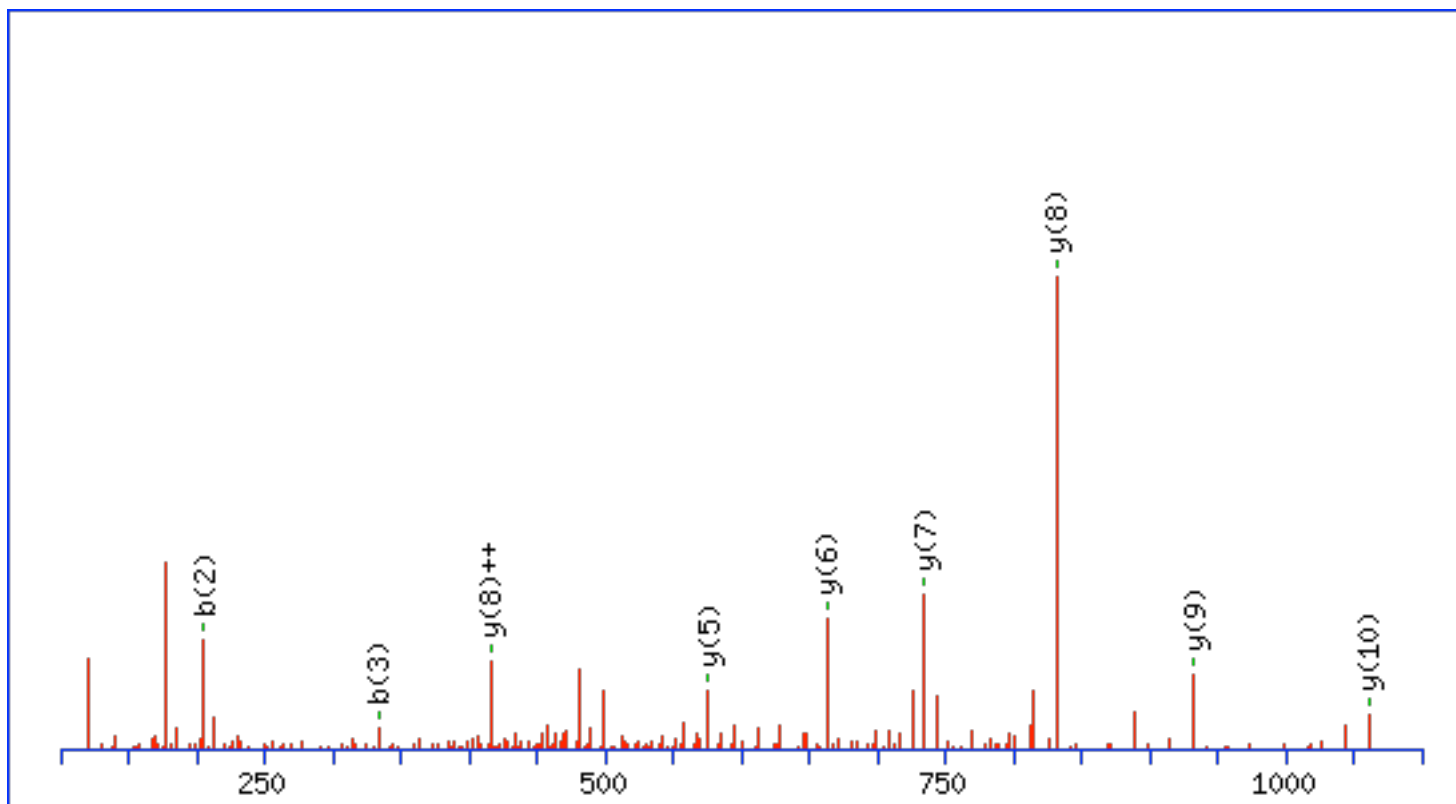

**Monoisotopic mass of neutral peptide Mr(calc): 1264.6048 Ions Score: 46 Expect: 0.33 Matches (Bold Red): 9/110**  
 fragment ions using 15 most intense peaks

| # | b               | b <sup>++</sup> | b <sup>*</sup> | b <sup>*++</sup> | b <sup>0</sup> | b <sup>0++</sup> | Seq. | y                | y <sup>++</sup> | y <sup>*</sup> | y <sup>*++</sup> | y <sup>0</sup> | y <sup>0++</sup> | #  |
|---|-----------------|-----------------|----------------|------------------|----------------|------------------|------|------------------|-----------------|----------------|------------------|----------------|------------------|----|
| 1 | 58.0287         | 29.5180         |                |                  |                |                  | G    |                  |                 |                |                  |                |                  | 12 |
| 2 | <b>205.0972</b> | 103.0522        |                |                  |                |                  | F    | 1208.5906        | 604.7989        | 1191.5640      | 596.2857         | 1190.5800      | 595.7937         | 11 |
| 3 | <b>334.1397</b> | 167.5735        |                |                  | 316.1292       | 158.5682         | E    | <b>1061.5222</b> | 531.2647        | 1044.4956      | 522.7515         | 1043.5116      | 522.2594         | 10 |
| 4 | 435.1874        | 218.0974        |                |                  | 417.1769       | 209.0921         | T    | <b>932.4796</b>  | 466.7434        | 915.4530       | 458.2302         | 914.4690       | 457.7381         | 9  |

|    |           |          |           |          |           |          |   |          |          |          |          |          |          |   |
|----|-----------|----------|-----------|----------|-----------|----------|---|----------|----------|----------|----------|----------|----------|---|
| 5  | 532.2402  | 266.6237 |           |          | 514.2296  | 257.6185 | P | 831.4319 | 416.2196 | 814.4054 | 407.7063 | 813.4213 | 407.2143 | 8 |
| 6  | 603.2773  | 302.1423 |           |          | 585.2667  | 293.1370 | A | 734.3791 | 367.6932 | 717.3526 | 359.1799 | 716.3686 | 358.6879 | 7 |
| 7  | 690.3093  | 345.6583 |           |          | 672.2988  | 336.6530 | S | 663.3420 | 332.1747 | 646.3155 | 323.6614 | 645.3315 | 323.1694 | 6 |
| 8  | 777.3414  | 389.1743 |           |          | 759.3308  | 380.1690 | S | 576.3100 | 288.6586 | 559.2835 | 280.1454 | 558.2994 | 279.6534 | 5 |
| 9  | 933.4425  | 467.2249 | 916.4159  | 458.7116 | 915.4319  | 458.2196 | R | 489.2780 | 245.1426 | 472.2514 | 236.6293 | 471.2674 | 236.1373 | 4 |
| 10 | 1046.5265 | 523.7669 | 1029.5000 | 515.2536 | 1028.5160 | 514.7616 | I | 333.1769 | 167.0921 | 316.1503 | 158.5788 | 315.1663 | 158.0868 | 3 |
| 11 | 1160.5695 | 580.7884 | 1143.5429 | 572.2751 | 1142.5589 | 571.7831 | N | 220.0928 | 110.5500 | 203.0662 | 102.0368 | 202.0822 | 101.5448 | 2 |
| 12 |           |          |           |          |           |          | S | 106.0499 | 53.5286  |          |          | 88.0393  | 44.5233  | 1 |

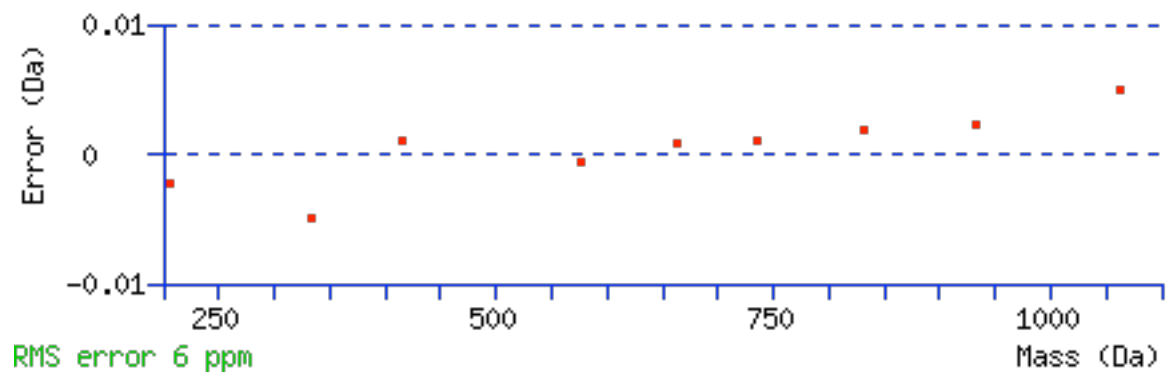

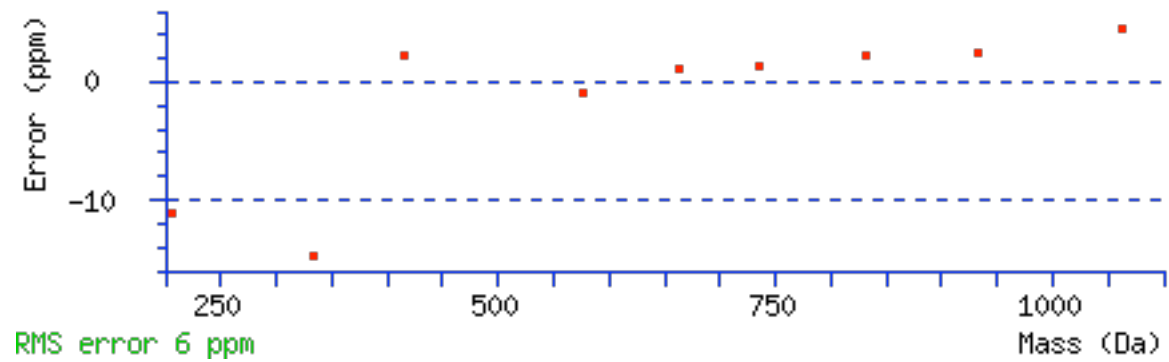

MS/MS Fragmentation of **GFRVLPQLNDDD**

Found in **XP\_001176287**, PREDICTED: hypothetical protein [Strongylocentrotus purpuratus].

Match to Query 154: 1387.407848 from(694.711200,2+) intensity(1157.2195)

Data file Maldi\_All.mgf

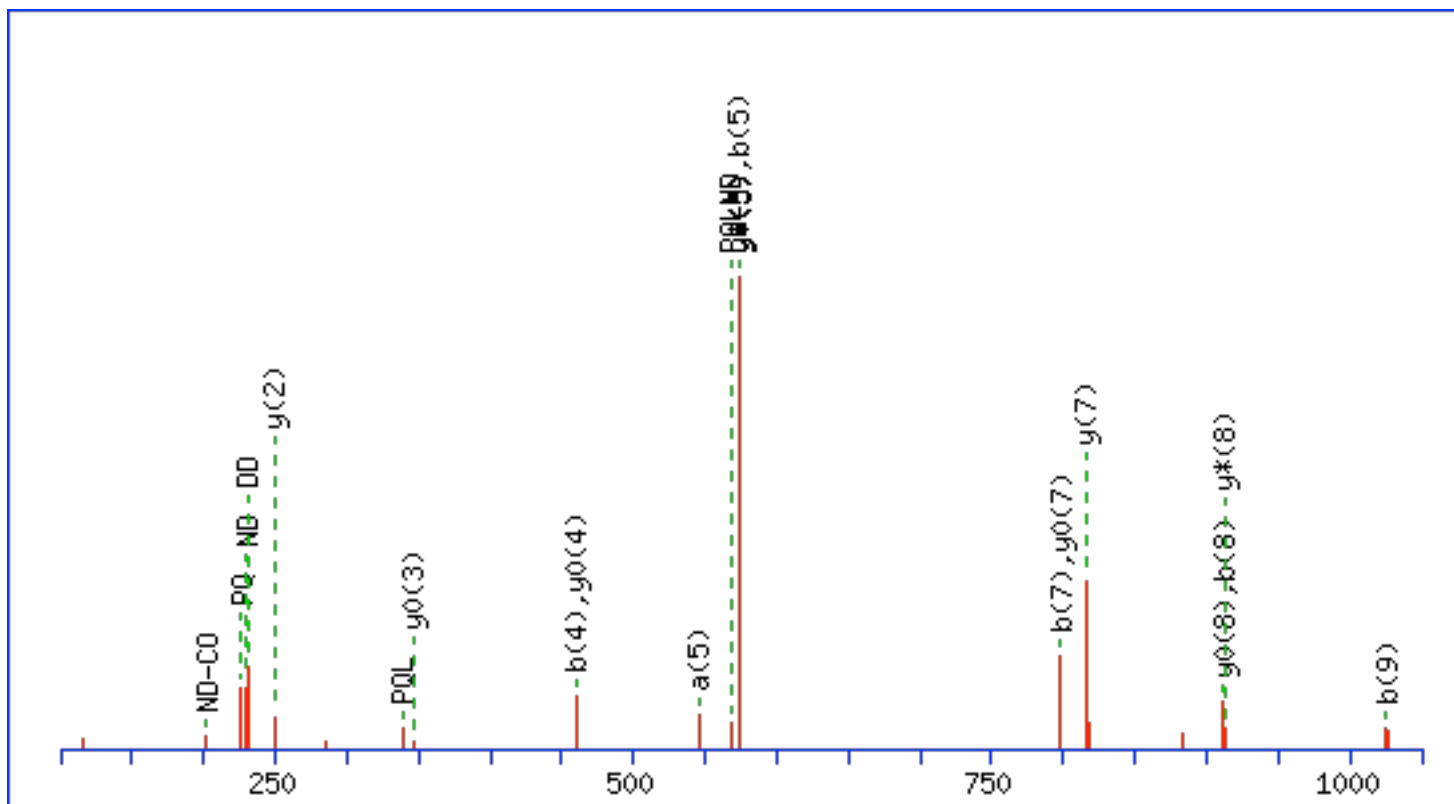

**Monoisotopic mass of neutral peptide Mr(calc): 1387.6732 Ions Score: 40 Expect: 1.9 Matches (Bold Red): 23/165**  
 fragment ions using 20 most intense peaks

| # | Immon.   | a        | a*       | a <sup>0</sup> | b               | b*       | b <sup>0</sup> | d        | Seq. | v         | w         | y         | y*        | y <sup>0</sup> | #  |
|---|----------|----------|----------|----------------|-----------------|----------|----------------|----------|------|-----------|-----------|-----------|-----------|----------------|----|
| 1 | 30.0338  | 30.0338  |          |                | 58.0287         |          |                |          | G    |           |           |           |           |                | 12 |
| 2 | 120.0808 | 177.1022 |          |                | 205.0972        |          |                |          | F    | 1239.5964 |           | 1331.6590 | 1314.6325 | 1313.6484      | 11 |
| 3 | 129.1135 | 333.2034 | 316.1768 |                | 361.1983        | 344.1717 |                | 248.1394 | R    | 1083.4953 | 1082.5000 | 1184.5906 | 1167.5640 | 1166.5800      | 10 |
| 4 | 72.0808  | 432.2718 | 415.2452 |                | <b>460.2667</b> | 443.2401 |                | 418.2561 | V    |           |           | 1028.4895 | 1011.4629 | 1010.4789      | 9  |

|    |          |                 |           |           |                  |           |           |           |   |  |  |                 |                 |                 |   |
|----|----------|-----------------|-----------|-----------|------------------|-----------|-----------|-----------|---|--|--|-----------------|-----------------|-----------------|---|
| 5  | 86.0964  | <b>545.3558</b> | 528.3293  |           | <b>573.3507</b>  | 556.3242  |           | 503.3089  | L |  |  | 929.4211        | <b>912.3945</b> | <b>911.4105</b> | 8 |
| 6  | 70.0651  | 642.4086        | 625.3820  |           | 670.4035         | 653.3770  |           | 616.3929  | P |  |  | <b>816.3370</b> | 799.3105        | <b>798.3264</b> | 7 |
| 7  | 101.0709 | 770.4672        | 753.4406  |           | <b>798.4621</b>  | 781.4355  |           | 713.4457  | Q |  |  | 719.2842        | 702.2577        | 701.2737        | 6 |
| 8  | 86.0964  | 883.5512        | 866.5247  |           | <b>911.5461</b>  | 894.5196  |           | 841.5043  | L |  |  | 591.2257        | <b>574.1991</b> | <b>573.2151</b> | 5 |
| 9  | 87.0553  | 997.5942        | 980.5676  |           | <b>1025.5891</b> | 1008.5625 |           | 954.5883  | N |  |  | 478.1416        | 461.1150        | <b>460.1310</b> | 4 |
| 10 | 88.0393  | 1112.6211       | 1095.5946 | 1094.6105 | 1140.6160        | 1123.5895 | 1122.6055 | 1068.6313 | D |  |  | 364.0987        |                 | <b>346.0881</b> | 3 |
| 11 | 88.0393  | 1227.6480       | 1210.6215 | 1209.6375 | 1255.6430        | 1238.6164 | 1237.6324 | 1183.6582 | D |  |  | <b>249.0717</b> |                 | <b>231.0612</b> | 2 |
| 12 | 88.0393  |                 |           |           |                  |           |           |           | D |  |  | 134.0448        |                 | 116.0342        | 1 |

| Seq    | ya       | yb              | Seq    | ya              | yb              | Seq    | ya       | yb              |
|--------|----------|-----------------|--------|-----------------|-----------------|--------|----------|-----------------|
| FR     | 276.1819 | 304.1768        | FRV    | 375.2503        | 403.2452        | FRVL   | 488.3344 | 516.3293        |
| FRVLP  | 585.3871 | 613.3820        | RV     | 228.1819        | 256.1768        | RVL    | 341.2660 | 369.2609        |
| RVLP   | 438.3187 | 466.3136        | RVLPQ  | 566.3773        | 594.3722        | RVLPQL | 679.4614 | 707.4563        |
| VL     | 185.1648 | 213.1598        | VLP    | 282.2176        | 310.2125        | VLPQ   | 410.2762 | 438.2711        |
| VLPQL  | 523.3602 | 551.3552        | VLPQLN | 637.4032        | 665.3981        | LP     | 183.1492 | 211.1441        |
| LPQ    | 311.2078 | <b>339.2027</b> | LPQL   | 424.2918        | 452.2867        | LPQLN  | 538.3348 | 566.3297        |
| LPQLND | 653.3617 | 681.3566        | PQ     | 198.1237        | <b>226.1186</b> | PQL    | 311.2078 | <b>339.2027</b> |
| PQLN   | 425.2507 | 453.2456        | PQLND  | 540.2776        | <b>568.2726</b> | PQLNDD | 655.3046 | 683.2995        |
| QL     | 214.1550 | 242.1499        | QLN    | 328.1979        | 356.1928        | QLND   | 443.2249 | 471.2198        |
| QLNDD  | 558.2518 | 586.2467        | LN     | 200.1394        | 228.1343        | LND    | 315.1663 | 343.1612        |
| LNDD   | 430.1932 | 458.1882        | ND     | <b>202.0822</b> | <b>230.0771</b> | NDD    | 317.1092 | 345.1041        |
| DD     | 203.0662 | <b>231.0612</b> |        |                 |                 |        |          |                 |



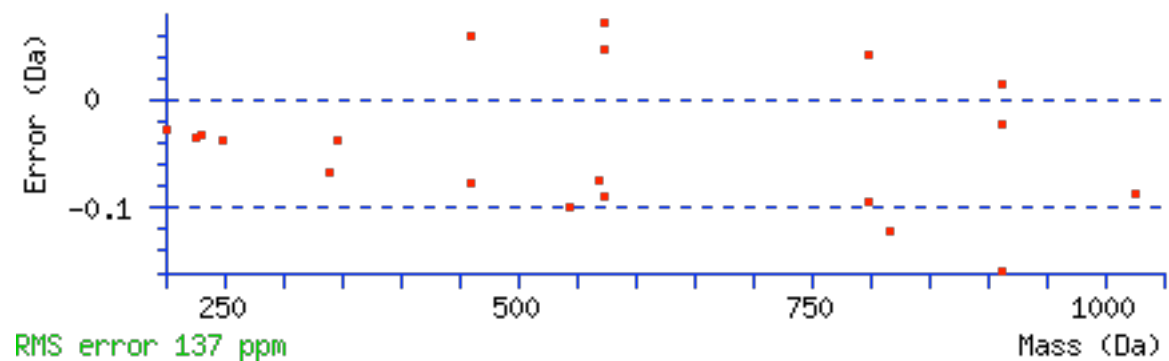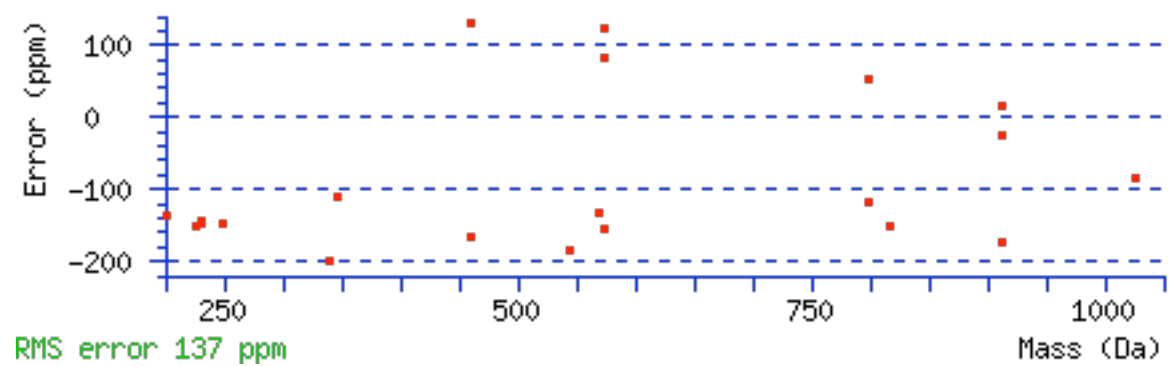

MS/MS Fragmentation of **GFRVLPQLNDDDN**

Found in **XP\_001176287**, PREDICTED: hypothetical protein [Strongylocentrotus purpuratus].

Match to Query 631: 1501.741188 from(751.877870,2+) intensity(810152.0000)

Title: Cmpd 169, +MSn(752.2778), 29.6 min

Data file Qtof\_all.mgf

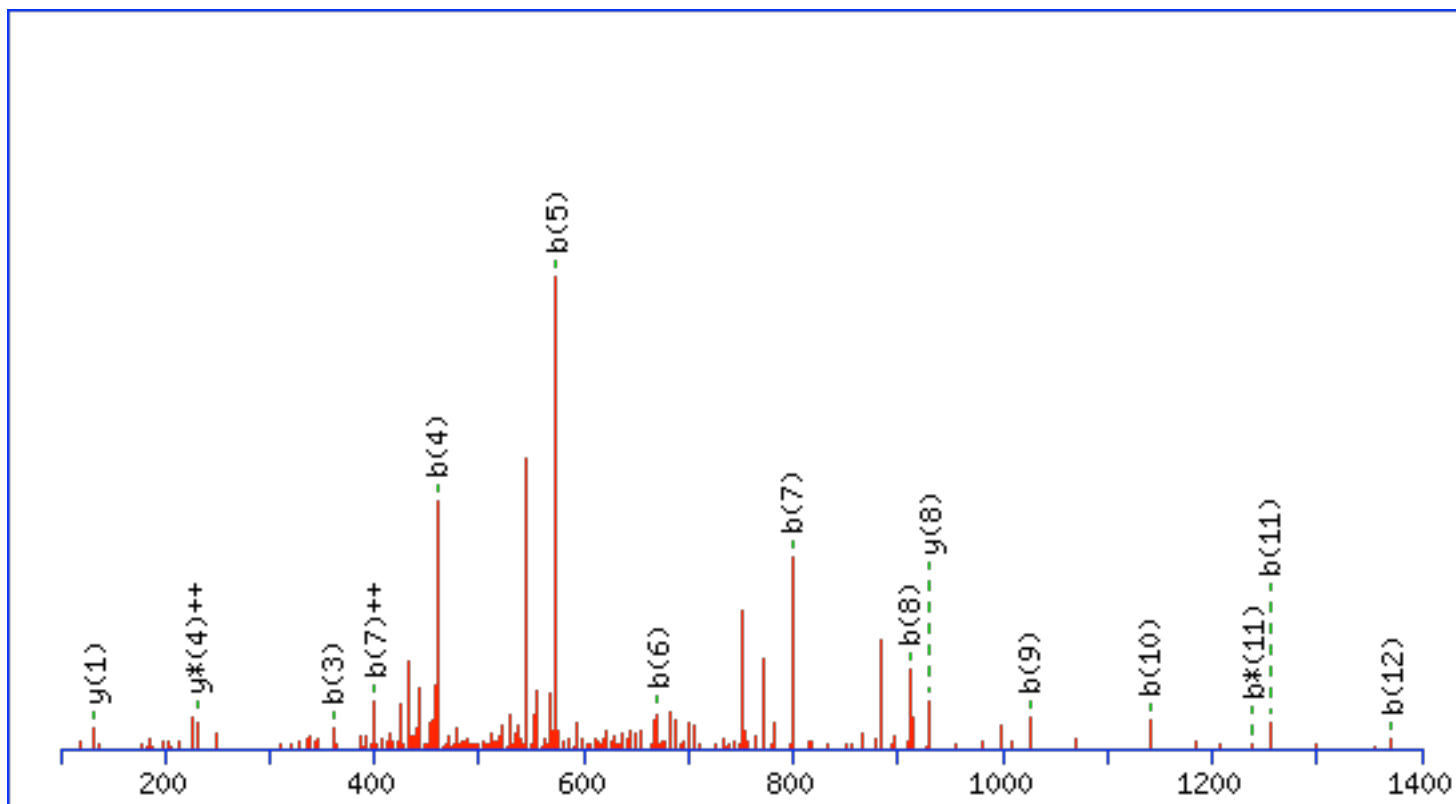

**Monoisotopic mass of neutral peptide Mr(calc): 1501.7161 Ions Score: 73 Expect: 0.00065 Matches (Bold Red):**  
 16/120 fragment ions using 26 most intense peaks

| # | b               | b <sup>++</sup> | b <sup>*</sup> | b <sup>***</sup> | b <sup>0</sup> | b <sup>0++</sup> | Seq. | y         | y <sup>++</sup> | y <sup>*</sup> | y <sup>***</sup> | y <sup>0</sup> | y <sup>0++</sup> | #  |
|---|-----------------|-----------------|----------------|------------------|----------------|------------------|------|-----------|-----------------|----------------|------------------|----------------|------------------|----|
| 1 | 58.0287         | 29.5180         |                |                  |                |                  | G    |           |                 |                |                  |                |                  | 13 |
| 2 | 205.0972        | 103.0522        |                |                  |                |                  | F    | 1445.7019 | 723.3546        | 1428.6754      | 714.8413         | 1427.6914      | 714.3493         | 12 |
| 3 | <b>361.1983</b> | 181.1028        | 344.1717       | 172.5895         |                |                  | R    | 1298.6335 | 649.8204        | 1281.6070      | 641.3071         | 1280.6230      | 640.8151         | 11 |
| 4 | <b>460.2667</b> | 230.6370        | 443.2401       | 222.1237         |                |                  | V    | 1142.5324 | 571.7698        | 1125.5059      | 563.2566         | 1124.5218      | 562.7646         | 10 |

|           |                  |                 |                  |          |           |          |          |                 |          |                 |                 |           |          |          |
|-----------|------------------|-----------------|------------------|----------|-----------|----------|----------|-----------------|----------|-----------------|-----------------|-----------|----------|----------|
| <b>5</b>  | <b>573.3507</b>  | 287.1790        | 556.3242         | 278.6657 |           |          | <b>L</b> | 1043.4640       | 522.2356 | 1026.4374       | 513.7224        | 1025.4534 | 513.2304 | <b>9</b> |
| <b>6</b>  | <b>670.4035</b>  | 335.7054        | 653.3770         | 327.1921 |           |          | <b>P</b> | <b>930.3799</b> | 465.6936 | 913.3534        | 457.1803        | 912.3694  | 456.6883 | <b>8</b> |
| <b>7</b>  | <b>798.4621</b>  | <b>399.7347</b> | 781.4355         | 391.2214 |           |          | <b>Q</b> | 833.3272        | 417.1672 | 816.3006        | 408.6539        | 815.3166  | 408.1619 | <b>7</b> |
| <b>8</b>  | <b>911.5461</b>  | 456.2767        | 894.5196         | 447.7634 |           |          | <b>L</b> | 705.2686        | 353.1379 | 688.2420        | 344.6247        | 687.2580  | 344.1326 | <b>6</b> |
| <b>9</b>  | <b>1025.5891</b> | 513.2982        | 1008.5625        | 504.7849 |           |          | <b>N</b> | 592.1845        | 296.5959 | 575.1580        | 288.0826        | 574.1740  | 287.5906 | <b>5</b> |
| <b>10</b> | <b>1140.6160</b> | 570.8116        | 1123.5895        | 562.2984 | 1122.6055 | 561.8064 | <b>D</b> | 478.1416        | 239.5744 | 461.1150        | <b>231.0612</b> | 460.1310  | 230.5692 | <b>4</b> |
| <b>11</b> | <b>1255.6430</b> | 628.3251        | <b>1238.6164</b> | 619.8118 | 1237.6324 | 619.3198 | <b>D</b> | 363.1147        | 182.0610 | 346.0881        | 173.5477        | 345.1041  | 173.0557 | <b>3</b> |
| <b>12</b> | <b>1370.6699</b> | 685.8386        | 1353.6434        | 677.3253 | 1352.6593 | 676.8333 | <b>D</b> | 248.0877        | 124.5475 | <b>231.0612</b> | 116.0342        | 230.0771  | 115.5422 | <b>2</b> |
| <b>13</b> |                  |                 |                  |          |           |          | <b>N</b> | <b>133.0608</b> | 67.0340  | 116.0342        | 58.5207         |           |          | <b>1</b> |

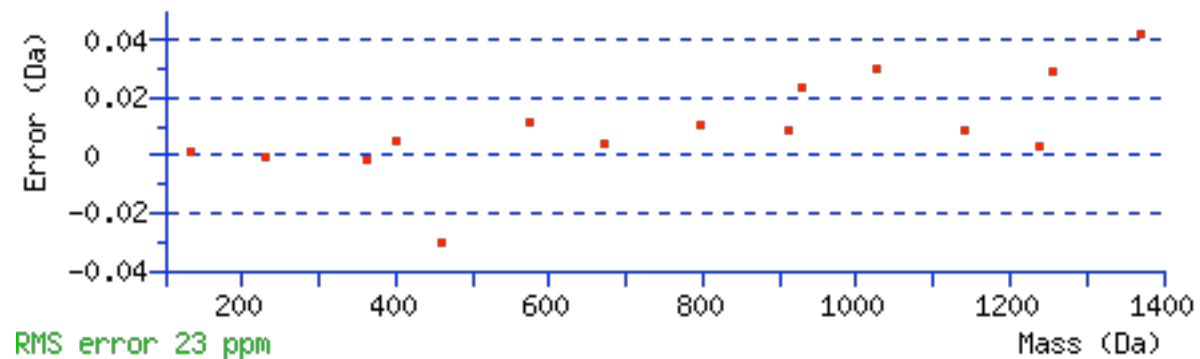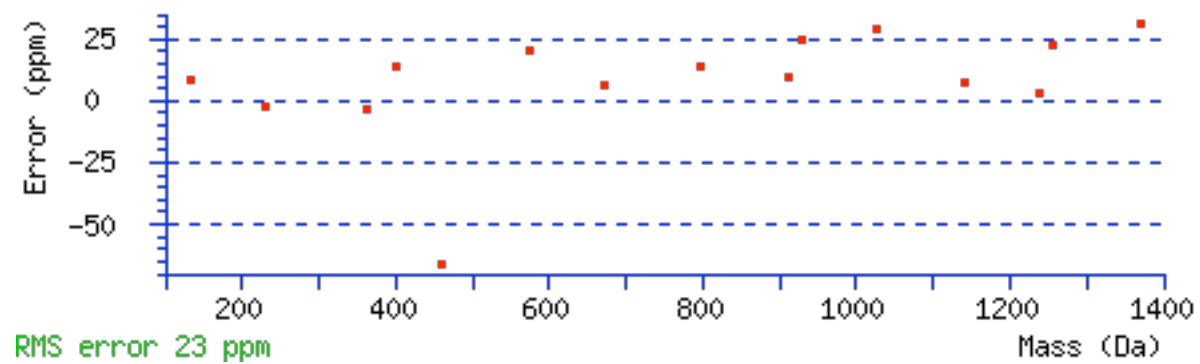

MS/MS Fragmentation of **EDGMELTHDEQPLNAMEI**

Found in **XP\_001176287**, PREDICTED: hypothetical protein [Strongylocentrotus purpuratus].

Match to Query 355: 2070.465648 from(1036.240100,2+) intensity(7861.3037)

Data file Maldi\_All.mgf

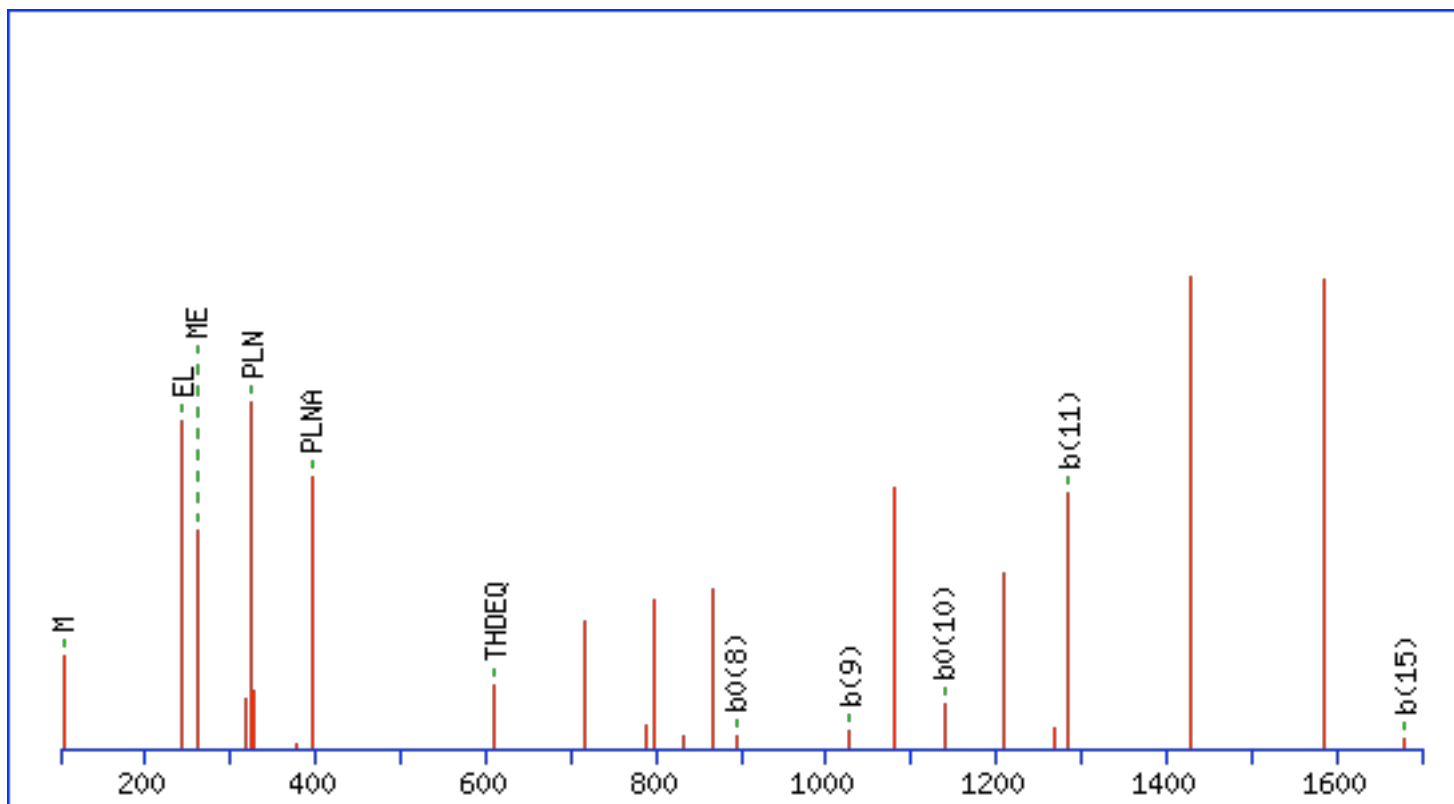

**Monoisotopic mass of neutral peptide Mr(calc):** 2069.9034 **Variable modifications:** C-term : Amidated (C-term) **Ions Score:** 11 **Expect:** 2.2e+03 **Matches (Bold Red):** 13/271 fragment ions using 18 most intense peaks

| # | Immon.          | a        | a* | a <sup>0</sup> | b        | b* | b <sup>0</sup> | Seq. | y         | y*        | y <sup>0</sup> | #  |
|---|-----------------|----------|----|----------------|----------|----|----------------|------|-----------|-----------|----------------|----|
| 1 | 102.0550        | 102.0550 |    | 84.0444        | 130.0499 |    | 112.0393       | E    |           |           |                | 18 |
| 2 | 88.0393         | 217.0819 |    | 199.0713       | 245.0768 |    | 227.0662       | D    | 1941.8681 | 1924.8415 | 1923.8575      | 17 |
| 3 | 30.0338         | 274.1034 |    | 256.0928       | 302.0983 |    | 284.0877       | G    | 1826.8411 | 1809.8146 | 1808.8306      | 16 |
| 4 | <b>104.0528</b> | 405.1438 |    | 387.1333       | 433.1388 |    | 415.1282       | M    | 1769.8197 | 1752.7931 | 1751.8091      | 15 |

|    |          |           |           |           |           |           |           |   |           |           |           |    |
|----|----------|-----------|-----------|-----------|-----------|-----------|-----------|---|-----------|-----------|-----------|----|
| 5  | 102.0550 | 534.1864  |           | 516.1759  | 562.1814  |           | 544.1708  | E | 1638.7792 | 1621.7526 | 1620.7686 | 14 |
| 6  | 86.0964  | 647.2705  |           | 629.2599  | 675.2654  |           | 657.2549  | L | 1509.7366 | 1492.7100 | 1491.7260 | 13 |
| 7  | 74.0600  | 748.3182  |           | 730.3076  | 776.3131  |           | 758.3025  | T | 1396.6525 | 1379.6260 | 1378.6420 | 12 |
| 8  | 110.0713 | 885.3771  |           | 867.3665  | 913.3720  |           | 895.3614  | H | 1295.6049 | 1278.5783 | 1277.5943 | 11 |
| 9  | 88.0393  | 1000.4040 |           | 982.3935  | 1028.3990 |           | 1010.3884 | D | 1158.5459 | 1141.5194 | 1140.5354 | 10 |
| 10 | 102.0550 | 1129.4466 |           | 1111.4361 | 1157.4415 |           | 1139.4310 | E | 1043.5190 | 1026.4925 | 1025.5084 | 9  |
| 11 | 101.0709 | 1257.5052 | 1240.4787 | 1239.4946 | 1285.5001 | 1268.4736 | 1267.4896 | Q | 914.4764  | 897.4499  | 896.4658  | 8  |
| 12 | 70.0651  | 1354.5580 | 1337.5314 | 1336.5474 | 1382.5529 | 1365.5263 | 1364.5423 | P | 786.4178  | 769.3913  | 768.4073  | 7  |
| 13 | 86.0964  | 1467.6420 | 1450.6155 | 1449.6315 | 1495.6370 | 1478.6104 | 1477.6264 | L | 689.3651  | 672.3385  | 671.3545  | 6  |
| 14 | 87.0553  | 1581.6850 | 1564.6584 | 1563.6744 | 1609.6799 | 1592.6533 | 1591.6693 | N | 576.2810  | 559.2545  | 558.2704  | 5  |
| 15 | 44.0495  | 1652.7221 | 1635.6955 | 1634.7115 | 1680.7170 | 1663.6904 | 1662.7064 | A | 462.2381  |           | 444.2275  | 4  |
| 16 | 104.0528 | 1783.7626 | 1766.7360 | 1765.7520 | 1811.7575 | 1794.7309 | 1793.7469 | M | 391.2010  |           | 373.1904  | 3  |
| 17 | 102.0550 | 1912.8052 | 1895.7786 | 1894.7946 | 1940.8001 | 1923.7735 | 1922.7895 | E | 260.1605  |           | 242.1499  | 2  |
| 18 | 86.0964  |           |           |           |           |           |           | I | 131.1179  |           |           | 1  |

| Seq    | ya       | yb       | Seq    | ya       | yb       | Seq    | ya       | yb       |
|--------|----------|----------|--------|----------|----------|--------|----------|----------|
| DG     | 145.0608 | 173.0557 | DGM    | 276.1013 | 304.0962 | DGME   | 405.1438 | 433.1388 |
| DGMEL  | 518.2279 | 546.2228 | DGMELT | 619.2756 | 647.2705 | GM     | 161.0743 | 189.0692 |
| GME    | 290.1169 | 318.1118 | GMEL   | 403.2010 | 431.1959 | GMELT  | 504.2486 | 532.2436 |
| GMELTH | 641.3076 | 669.3025 | ME     | 233.0954 | 261.0904 | MEL    | 346.1795 | 374.1744 |
| MELT   | 447.2272 | 475.2221 | MELTH  | 584.2861 | 612.2810 | MELTHD | 699.3130 | 727.3080 |
| EL     | 215.1390 | 243.1339 | ELT    | 316.1867 | 344.1816 | ELTH   | 453.2456 | 481.2405 |
| ELTHD  | 568.2726 | 596.2675 | ELTHDE | 697.3151 | 725.3101 | LT     | 187.1441 | 215.1390 |
| LTH    | 324.2030 | 352.1979 | LTHD   | 439.2300 | 467.2249 | LTHDE  | 568.2726 | 596.2675 |
| LTHDEQ | 696.3311 | 724.3260 | TH     | 211.1190 | 239.1139 | THD    | 326.1459 | 354.1408 |

|               |          |                 |               |          |                 |               |          |          |
|---------------|----------|-----------------|---------------|----------|-----------------|---------------|----------|----------|
| <b>THDE</b>   | 455.1885 | 483.1834        | <b>THDEQ</b>  | 583.2471 | <b>611.2420</b> | <b>THDEQP</b> | 680.2998 | 708.2947 |
| <b>HD</b>     | 225.0982 | 253.0931        | <b>HDE</b>    | 354.1408 | 382.1357        | <b>HDEQ</b>   | 482.1994 | 510.1943 |
| <b>HDEQP</b>  | 579.2522 | 607.2471        | <b>HDEQPL</b> | 692.3362 | 720.3311        | <b>DE</b>     | 217.0819 | 245.0768 |
| <b>DEQ</b>    | 345.1405 | 373.1354        | <b>DEQP</b>   | 442.1932 | 470.1882        | <b>DEQPL</b>  | 555.2773 | 583.2722 |
| <b>DEQPLN</b> | 669.3202 | 697.3151        | <b>EQ</b>     | 230.1135 | 258.1084        | <b>EQP</b>    | 327.1663 | 355.1612 |
| <b>EQPL</b>   | 440.2504 | 468.2453        | <b>EQPLN</b>  | 554.2933 | 582.2882        | <b>EQPLNA</b> | 625.3304 | 653.3253 |
| <b>QP</b>     | 198.1237 | 226.1186        | <b>QPL</b>    | 311.2078 | 339.2027        | <b>QPLN</b>   | 425.2507 | 453.2456 |
| <b>QPLNA</b>  | 496.2878 | 524.2827        | <b>QPLNAM</b> | 627.3283 | 655.3232        | <b>PL</b>     | 183.1492 | 211.1441 |
| <b>PLN</b>    | 297.1921 | <b>325.1870</b> | <b>PLNA</b>   | 368.2292 | <b>396.2241</b> | <b>PLNAM</b>  | 499.2697 | 527.2646 |
| <b>PLNAME</b> | 628.3123 | 656.3072        | <b>LN</b>     | 200.1394 | 228.1343        | <b>LNA</b>    | 271.1765 | 299.1714 |
| <b>LNAM</b>   | 402.2170 | 430.2119        | <b>LNAME</b>  | 531.2595 | 559.2545        | <b>NA</b>     | 158.0924 | 186.0873 |
| <b>NAM</b>    | 289.1329 | 317.1278        | <b>NAME</b>   | 418.1755 | 446.1704        | <b>AM</b>     | 175.0900 | 203.0849 |
| <b>AME</b>    | 304.1326 | 332.1275        | <b>ME</b>     | 233.0954 | <b>261.0904</b> |               |          |          |

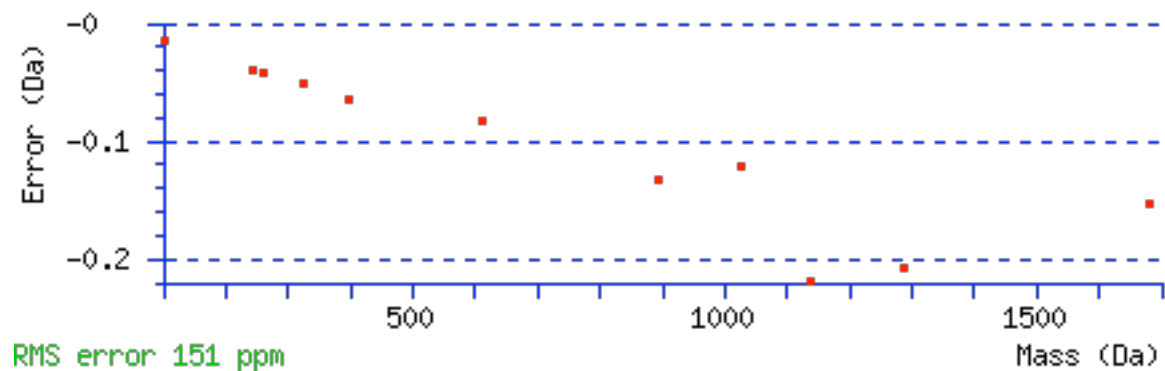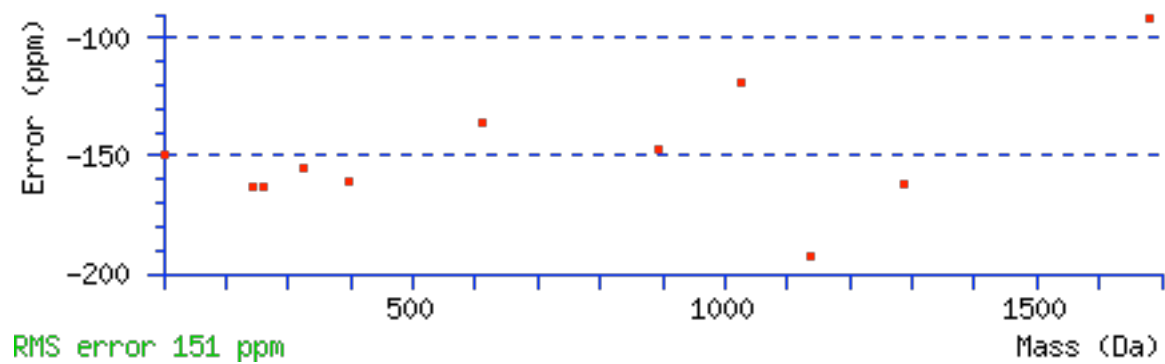

MS/MS Fragmentation of **SPQDEQIDLRYLLQNFLDNRDT**

Found in **XP\_001176287**, PREDICTED: hypothetical protein [Strongylocentrotus purpuratus].

Match to Query 470: 2692.793772 from(898.605200,3+) intensity(21701.3164)

Data file Maldi\_All.mgf



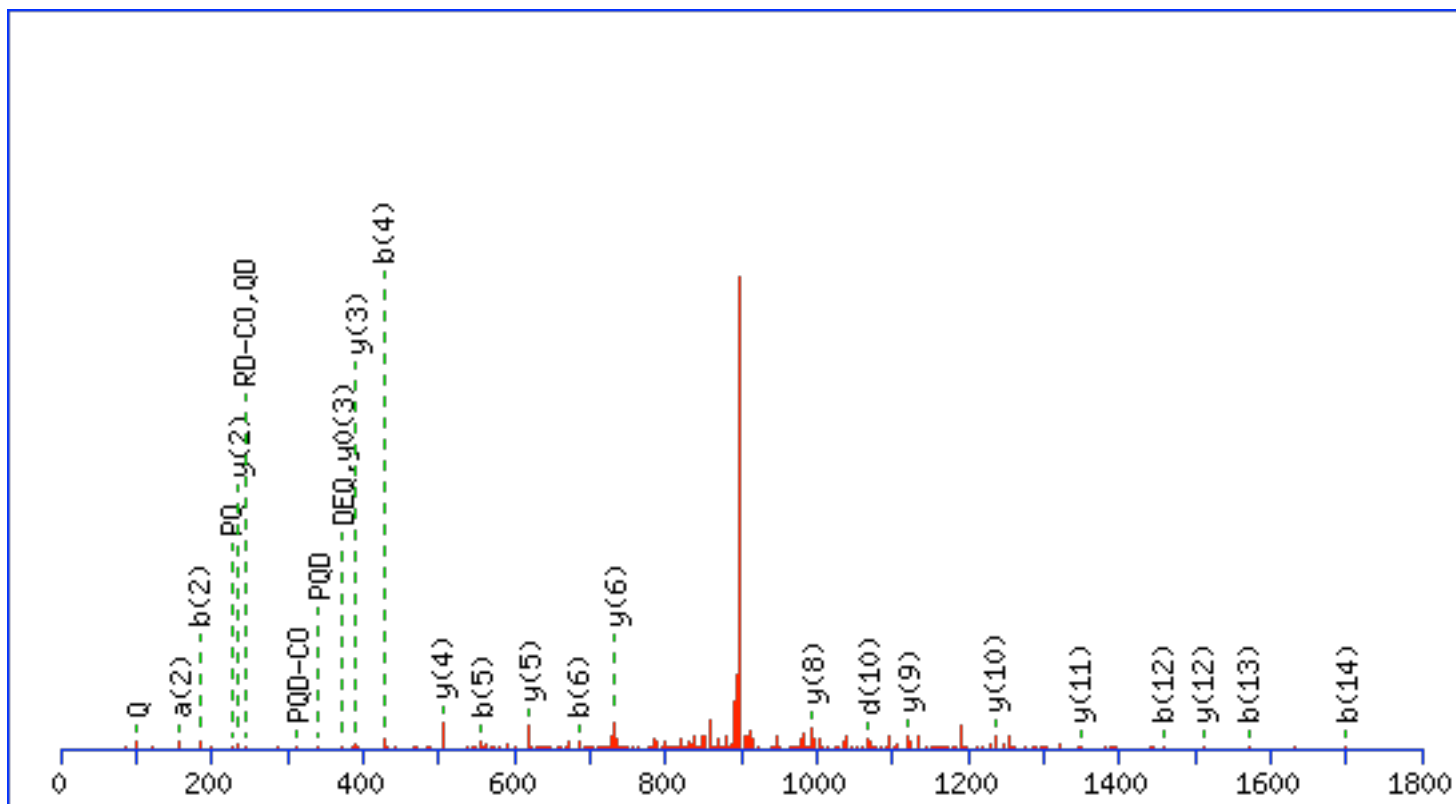

**Monoisotopic mass of neutral peptide Mr(calc): 2692.3092 Ions Score: 48 Expect: 0.42 Matches (Bold Red): 31/394**  
 fragment ions using 69 most intense peaks

| # | Immon.  | a               | a* | a <sup>0</sup> | b               | b* | b <sup>0</sup> | d | Seq | v             | w             | w' | y             | y*            | y <sup>0</sup> | #      |
|---|---------|-----------------|----|----------------|-----------------|----|----------------|---|-----|---------------|---------------|----|---------------|---------------|----------------|--------|
| 1 | 60.0444 | 60.0444         |    | 42.0338        | 88.0393         |    | 70.0287        |   | S   |               |               |    |               |               |                | 2<br>2 |
| 2 | 70.0651 | <b>157.0972</b> |    | 139.0866       | <b>185.0921</b> |    | 167.0815       |   | P   | 2564.237<br>6 | 2563.242<br>3 |    | 2606.284<br>5 | 2589.258<br>0 | 2588.274<br>0  | 2<br>1 |

|           |                            |               |               |               |                             |               |               |                             |          |               |               |               |                             |               |               |                      |
|-----------|----------------------------|---------------|---------------|---------------|-----------------------------|---------------|---------------|-----------------------------|----------|---------------|---------------|---------------|-----------------------------|---------------|---------------|----------------------|
| <b>3</b>  | <b>101.070</b><br><b>9</b> | 285.1557      | 268.1292      | 267.1452      | <b>313.1506</b>             | 296.1241      | 295.1401      |                             | <b>Q</b> | 2436.179<br>0 | 2435.183<br>7 |               | 2509.231<br>8               | 2492.205<br>2 | 2491.221<br>2 | <b>2</b><br><b>0</b> |
| <b>4</b>  | 88.0393                    | 400.1827      | 383.1561      | 382.1721      | <b>428.1776</b>             | 411.1510      | 410.1670      |                             | <b>D</b> | 2321.152<br>1 | 2320.156<br>8 |               | 2381.173<br>2               | 2364.146<br>6 | 2363.162<br>6 | <b>1</b><br><b>9</b> |
| <b>5</b>  | 102.055<br>0               | 529.2253      | 512.1987      | 511.2147      | <b>557.2202</b>             | 540.1936      | 539.2096      |                             | <b>E</b> | 2192.109<br>5 | 2191.114<br>2 |               | 2266.146<br>2               | 2249.119<br>7 | 2248.135<br>7 | <b>1</b><br><b>8</b> |
| <b>6</b>  | <b>101.070</b><br><b>9</b> | 657.2838      | 640.2573      | 639.2733      | <b>685.2788</b>             | 668.2522      | 667.2682      |                             | <b>Q</b> | 2064.050<br>9 | 2063.055<br>6 |               | 2137.103<br>6               | 2120.077<br>1 | 2119.093<br>1 | <b>1</b><br><b>7</b> |
| <b>7</b>  | 86.0964                    | 770.3679      | 753.3414      | 752.3573      | 798.3628                    | 781.3363      | 780.3523      |                             | <b>I</b> | 1950.966<br>8 | 1963.987<br>2 | 1978.002<br>9 | 2009.045<br>1               | 1992.018<br>5 | 1991.034<br>5 | <b>1</b><br><b>6</b> |
| <b>8</b>  | 88.0393                    | 885.3949      | 868.3683      | 867.3843      | 913.3898                    | 896.3632      | 895.3792      |                             | <b>D</b> | 1835.939<br>9 | 1834.944<br>6 |               | 1895.961<br>0               | 1878.934<br>5 | 1877.950<br>4 | <b>1</b><br><b>5</b> |
| <b>9</b>  | 86.0964                    | 998.4789      | 981.4524      | 980.4684      | 1026.473<br>8               | 1009.447<br>3 | 1008.463<br>3 |                             | <b>L</b> | 1722.855<br>8 | 1721.860<br>6 |               | 1780.934<br>1               | 1763.907<br>5 | 1762.923<br>5 | <b>1</b><br><b>4</b> |
| <b>10</b> | 129.113<br>5               | 1154.580<br>0 | 1137.553<br>5 | 1136.569<br>5 | 1182.574<br>9               | 1165.548<br>4 | 1164.564<br>4 | <b>1069.516</b><br><b>0</b> | <b>R</b> | 1566.754<br>7 | 1565.759<br>4 |               | 1667.850<br>0               | 1650.823<br>4 | 1649.839<br>4 | <b>1</b><br><b>3</b> |
| <b>11</b> | 136.075<br>7               | 1317.643<br>4 | 1300.616<br>8 | 1299.632<br>8 | 1345.638<br>3               | 1328.611<br>7 | 1327.627<br>7 |                             | <b>Y</b> | 1403.691<br>4 |               |               | <b>1511.748</b><br><b>9</b> | 1494.722<br>3 | 1493.738<br>3 | <b>1</b><br><b>2</b> |
| <b>12</b> | 86.0964                    | 1430.727<br>4 | 1413.700<br>9 | 1412.716<br>9 | <b>1458.722</b><br><b>3</b> | 1441.695<br>8 | 1440.711<br>8 | 1388.680<br>5               | <b>L</b> | 1290.607<br>3 | 1289.612<br>1 |               | <b>1348.685</b><br><b>6</b> | 1331.659<br>0 | 1330.675<br>0 | <b>1</b><br><b>1</b> |
| <b>13</b> | 86.0964                    | 1543.811<br>5 | 1526.784<br>9 | 1525.800<br>9 | <b>1571.806</b><br><b>4</b> | 1554.779<br>8 | 1553.795<br>8 | 1501.764<br>5               | <b>L</b> | 1177.523<br>2 | 1176.528<br>0 |               | <b>1235.601</b><br><b>5</b> | 1218.574<br>9 | 1217.590<br>9 | <b>1</b><br><b>0</b> |
| <b>14</b> | <b>101.070</b><br><b>9</b> | 1671.870<br>1 | 1654.843<br>5 | 1653.859<br>5 | <b>1699.865</b><br><b>0</b> | 1682.838<br>4 | 1681.854<br>4 | 1614.848<br>6               | <b>Q</b> | 1049.464<br>7 | 1048.469<br>4 |               | <b>1122.517</b><br><b>4</b> | 1105.490<br>9 | 1104.506<br>9 | <b>9</b>             |
| <b>15</b> | 87.0553                    | 1785.913<br>0 | 1768.886<br>4 | 1767.902<br>4 | 1813.907<br>9               | 1796.881<br>4 | 1795.897<br>3 | 1742.907<br>2               | <b>N</b> | 935.4217      | 934.4265      |               | <b>994.4588</b>             | 977.4323      | 976.4483      | <b>8</b>             |
| <b>16</b> | 120.080<br>8               | 1932.981<br>4 | 1915.954<br>9 | 1914.970<br>8 | 1960.976<br>3               | 1943.949<br>8 | 1942.965<br>8 |                             | <b>F</b> | 788.3533      |               |               | 880.4159                    | 863.3894      | 862.4054      | <b>7</b>             |

|           |              |               |               |               |               |               |               |               |          |          |          |  |                 |          |                 |          |
|-----------|--------------|---------------|---------------|---------------|---------------|---------------|---------------|---------------|----------|----------|----------|--|-----------------|----------|-----------------|----------|
| <b>17</b> | 86.0964      | 2046.065<br>5 | 2029.038<br>9 | 2028.054<br>9 | 2074.060<br>4 | 2057.033<br>8 | 2056.049<br>8 | 2004.018<br>5 | <b>L</b> | 675.2693 | 674.2740 |  | <b>733.3475</b> | 716.3210 | 715.3369        | <b>6</b> |
| <b>18</b> | 88.0393      | 2161.092<br>4 | 2144.065<br>9 | 2143.081<br>8 | 2189.087<br>3 | 2172.060<br>8 | 2171.076<br>8 | 2117.102<br>6 | <b>D</b> | 560.2423 | 559.2471 |  | <b>620.2634</b> | 603.2369 | 602.2529        | <b>5</b> |
| <b>19</b> | 87.0553      | 2275.135<br>3 | 2258.108<br>8 | 2257.124<br>8 | 2303.130<br>3 | 2286.103<br>7 | 2285.119<br>7 | 2232.129<br>5 | <b>N</b> | 446.1994 | 445.2041 |  | <b>505.2365</b> | 488.2100 | 487.2259        | <b>4</b> |
| <b>20</b> | 129.113<br>5 | 2431.236<br>4 | 2414.209<br>9 | 2413.225<br>9 | 2459.231<br>4 | 2442.204<br>8 | 2441.220<br>8 | 2346.172<br>5 | <b>R</b> | 290.0983 | 289.1030 |  | <b>391.1936</b> | 374.1670 | <b>373.1830</b> | <b>3</b> |
| <b>21</b> | 88.0393      | 2546.263<br>4 | 2529.236<br>8 | 2528.252<br>8 | 2574.258<br>3 | 2557.231<br>8 | 2556.247<br>7 | 2502.273<br>6 | <b>D</b> |          |          |  | <b>235.0925</b> |          | 217.0819        | <b>2</b> |
| <b>22</b> | 74.0600      |               |               |               |               |               |               |               | <b>T</b> |          |          |  | 120.0655        |          | 102.0550        | <b>1</b> |

| Seq          | ya       | yb              | Seq           | ya              | yb              | Seq          | ya       | yb              |
|--------------|----------|-----------------|---------------|-----------------|-----------------|--------------|----------|-----------------|
| <b>PQ</b>    | 198.1237 | <b>226.1186</b> | <b>PQD</b>    | <b>313.1506</b> | <b>341.1456</b> | <b>PQDE</b>  | 442.1932 | 470.1882        |
| <b>PQDEQ</b> | 570.2518 | 598.2467        | <b>PQDEQI</b> | 683.3359        | 711.3308        | <b>QD</b>    | 216.0979 | <b>244.0928</b> |
| <b>QDE</b>   | 345.1405 | <b>373.1354</b> | <b>QDEQ</b>   | 473.1991        | 501.1940        | <b>QDEQI</b> | 586.2831 | 614.2780        |
| <b>DE</b>    | 217.0819 | 245.0768        | <b>DEQ</b>    | 345.1405        | <b>373.1354</b> | <b>DEQI</b>  | 458.2245 | 486.2195        |
| <b>DEQID</b> | 573.2515 | 601.2464        | <b>DEQIDL</b> | 686.3355        | 714.3305        | <b>EQ</b>    | 230.1135 | 258.1084        |
| <b>EQI</b>   | 343.1976 | 371.1925        | <b>EQID</b>   | 458.2245        | 486.2195        | <b>EQIDL</b> | 571.3086 | 599.3035        |
| <b>QI</b>    | 214.1550 | 242.1499        | <b>QID</b>    | 329.1819        | 357.1769        | <b>QIDL</b>  | 442.2660 | 470.2609        |
| <b>QIDLR</b> | 598.3671 | 626.3620        | <b>ID</b>     | 201.1234        | 229.1183        | <b>IDL</b>   | 314.2074 | 342.2023        |
| <b>IDLR</b>  | 470.3085 | 498.3035        | <b>IDLRY</b>  | 633.3719        | 661.3668        | <b>DL</b>    | 201.1234 | 229.1183        |
| <b>DLR</b>   | 357.2245 | 385.2194        | <b>DLRY</b>   | 520.2878        | 548.2827        | <b>DLRYL</b> | 633.3719 | 661.3668        |
| <b>LR</b>    | 242.1975 | 270.1925        | <b>LRY</b>    | 405.2609        | 433.2558        | <b>LRYL</b>  | 518.3449 | 546.3398        |
| <b>LRYLL</b> | 631.4290 | 659.4239        | <b>RY</b>     | 292.1768        | 320.1717        | <b>RYL</b>   | 405.2609 | 433.2558        |
| <b>RYLL</b>  | 518.3449 | 546.3398        | <b>RYLLQ</b>  | 646.4035        | 674.3984        | <b>YL</b>    | 249.1598 | 277.1547        |

|              |          |          |              |          |          |              |                 |          |
|--------------|----------|----------|--------------|----------|----------|--------------|-----------------|----------|
| <b>YLL</b>   | 362.2438 | 390.2387 | <b>YLLQ</b>  | 490.3024 | 518.2973 | <b>YLLQN</b> | 604.3453        | 632.3402 |
| <b>LL</b>    | 199.1805 | 227.1754 | <b>LLQ</b>   | 327.2391 | 355.2340 | <b>LLQN</b>  | 441.2820        | 469.2769 |
| <b>LLQNF</b> | 588.3504 | 616.3453 | <b>LQ</b>    | 214.1550 | 242.1499 | <b>LQN</b>   | 328.1979        | 356.1928 |
| <b>LQNF</b>  | 475.2663 | 503.2613 | <b>LQNFL</b> | 588.3504 | 616.3453 | <b>QN</b>    | 215.1139        | 243.1088 |
| <b>QNF</b>   | 362.1823 | 390.1772 | <b>QNFL</b>  | 475.2663 | 503.2613 | <b>QNFLD</b> | 590.2933        | 618.2882 |
| <b>NF</b>    | 234.1237 | 262.1186 | <b>NFL</b>   | 347.2078 | 375.2027 | <b>NFLD</b>  | 462.2347        | 490.2296 |
| <b>NFLDN</b> | 576.2776 | 604.2726 | <b>FL</b>    | 233.1648 | 261.1598 | <b>FLD</b>   | 348.1918        | 376.1867 |
| <b>FLDN</b>  | 462.2347 | 490.2296 | <b>FLDNR</b> | 618.3358 | 646.3307 | <b>LD</b>    | 201.1234        | 229.1183 |
| <b>LDN</b>   | 315.1663 | 343.1612 | <b>LDNR</b>  | 471.2674 | 499.2623 | <b>LDNRD</b> | 586.2943        | 614.2893 |
| <b>DN</b>    | 202.0822 | 230.0771 | <b>DNR</b>   | 358.1833 | 386.1783 | <b>DNRD</b>  | 473.2103        | 501.2052 |
| <b>NR</b>    | 243.1564 | 271.1513 | <b>NRD</b>   | 358.1833 | 386.1783 | <b>RD</b>    | <b>244.1404</b> | 272.1353 |

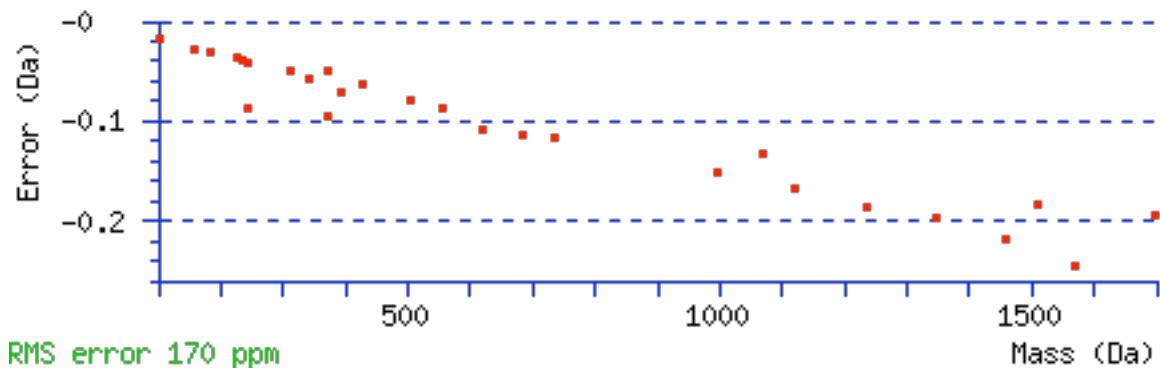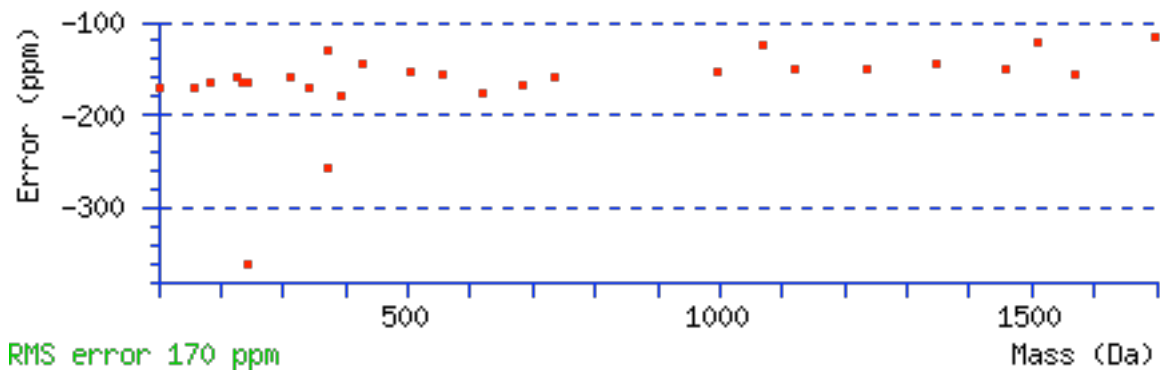

MS/MS Fragmentation of **GFNSGAMEPLGAGFF**

Found in **XP\_785647**, PREDICTED: similar to pedal peptide precursor protein [Strongylocentrotus purpuratus].

Match to Query 628: 1500.706768 from(751.360660,2+) intensity(701012.0000)

Title: Cmpd 248, +MSn(751.6144), 36.7 min

Data file Qtof\_all.mgf

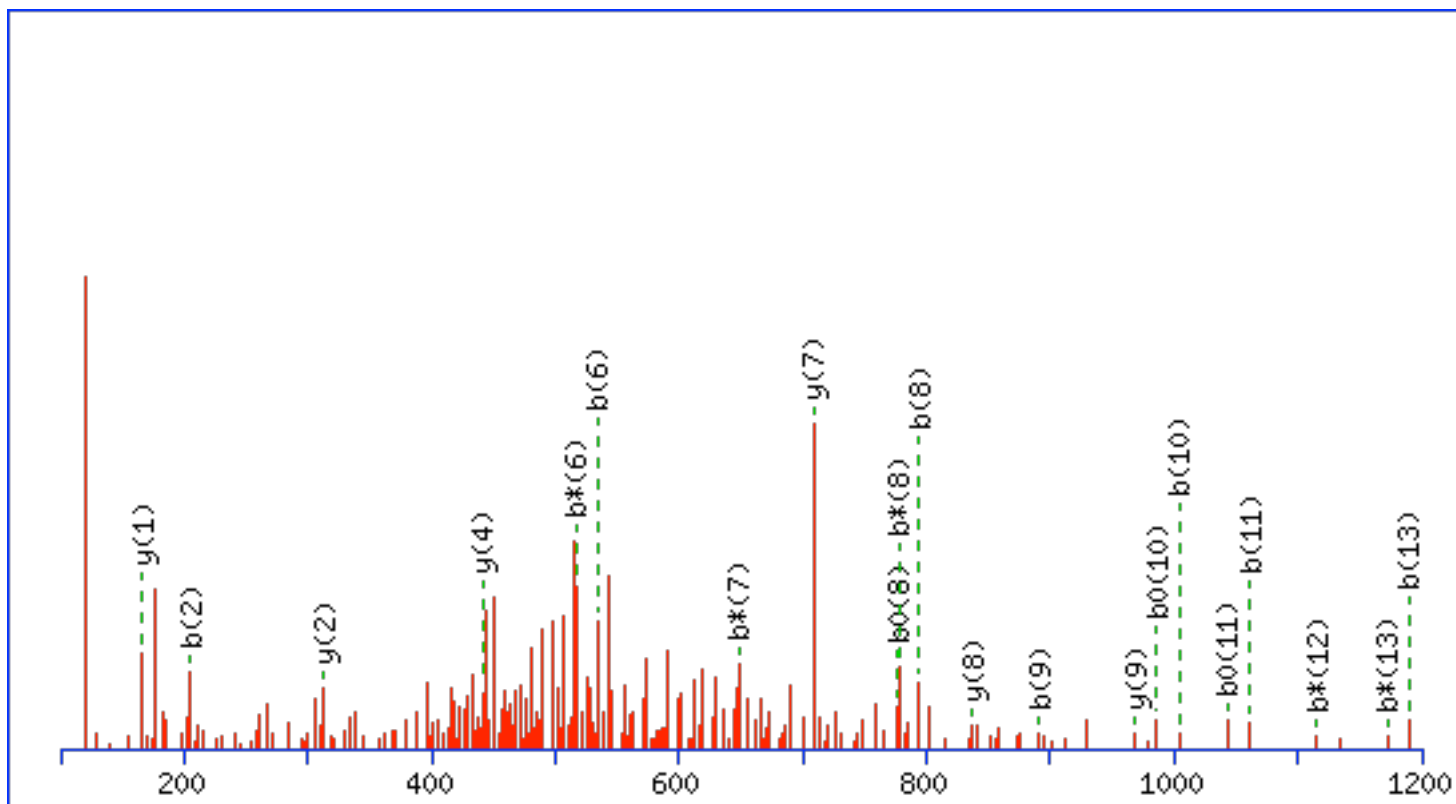

**Monoisotopic mass of neutral peptide Mr(calc): 1500.6708 Ions Score: 30 Expect: 12 Matches (Bold Red): 21/120**  
 fragment ions using 47 most intense peaks

| # | b               | b <sup>++</sup> | b <sup>*</sup> | b <sup>*++</sup> | b <sup>0</sup> | b <sup>0++</sup> | Seq. | y         | y <sup>++</sup> | y <sup>*</sup> | y <sup>*++</sup> | y <sup>0</sup> | y <sup>0++</sup> | #  |
|---|-----------------|-----------------|----------------|------------------|----------------|------------------|------|-----------|-----------------|----------------|------------------|----------------|------------------|----|
| 1 | 58.0287         | 29.5180         |                |                  |                |                  | G    |           |                 |                |                  |                |                  | 15 |
| 2 | <b>205.0972</b> | 103.0522        |                |                  |                |                  | F    | 1444.6566 | 722.8319        | 1427.6300      | 714.3186         | 1426.6460      | 713.8266         | 14 |
| 3 | 319.1401        | 160.0737        | 302.1135       | 151.5604         |                |                  | N    | 1297.5882 | 649.2977        | 1280.5616      | 640.7844         | 1279.5776      | 640.2924         | 13 |
| 4 | 406.1721        | 203.5897        | 389.1456       | 195.0764         | 388.1615       | 194.5844         | S    | 1183.5452 | 592.2762        |                |                  | 1165.5347      | 583.2710         | 12 |

|           |                  |          |                  |          |                  |          |          |                 |          |  |  |           |          |           |
|-----------|------------------|----------|------------------|----------|------------------|----------|----------|-----------------|----------|--|--|-----------|----------|-----------|
| <b>5</b>  | 463.1936         | 232.1004 | 446.1670         | 223.5872 | 445.1830         | 223.0951 | <b>G</b> | 1096.5132       | 548.7602 |  |  | 1078.5026 | 539.7550 | <b>11</b> |
| <b>6</b>  | <b>534.2307</b>  | 267.6190 | <b>517.2041</b>  | 259.1057 | 516.2201         | 258.6137 | <b>A</b> | 1039.4917       | 520.2495 |  |  | 1021.4812 | 511.2442 | <b>10</b> |
| <b>7</b>  | 665.2712         | 333.1392 | <b>648.2446</b>  | 324.6259 | 647.2606         | 324.1339 | <b>M</b> | <b>968.4546</b> | 484.7309 |  |  | 950.4441  | 475.7257 | <b>9</b>  |
| <b>8</b>  | <b>794.3138</b>  | 397.6605 | <b>777.2872</b>  | 389.1472 | <b>776.3032</b>  | 388.6552 | <b>E</b> | <b>837.4141</b> | 419.2107 |  |  | 819.4036  | 410.2054 | <b>8</b>  |
| <b>9</b>  | <b>891.3665</b>  | 446.1869 | 874.3400         | 437.6736 | 873.3560         | 437.1816 | <b>P</b> | <b>708.3715</b> | 354.6894 |  |  |           |          | <b>7</b>  |
| <b>10</b> | <b>1004.4506</b> | 502.7289 | 987.4240         | 494.2157 | <b>986.4400</b>  | 493.7237 | <b>L</b> | 611.3188        | 306.1630 |  |  |           |          | <b>6</b>  |
| <b>11</b> | <b>1061.4721</b> | 531.2397 | 1044.4455        | 522.7264 | <b>1043.4615</b> | 522.2344 | <b>G</b> | 498.2347        | 249.6210 |  |  |           |          | <b>5</b>  |
| <b>12</b> | 1132.5092        | 566.7582 | <b>1115.4826</b> | 558.2449 | 1114.4986        | 557.7529 | <b>A</b> | <b>441.2132</b> | 221.1103 |  |  |           |          | <b>4</b>  |
| <b>13</b> | <b>1189.5306</b> | 595.2690 | <b>1172.5041</b> | 586.7557 | 1171.5201        | 586.2637 | <b>G</b> | 370.1761        | 185.5917 |  |  |           |          | <b>3</b>  |
| <b>14</b> | 1336.5990        | 668.8032 | 1319.5725        | 660.2899 | 1318.5885        | 659.7979 | <b>F</b> | <b>313.1547</b> | 157.0810 |  |  |           |          | <b>2</b>  |
| <b>15</b> |                  |          |                  |          |                  |          | <b>F</b> | <b>166.0863</b> | 83.5468  |  |  |           |          | <b>1</b>  |

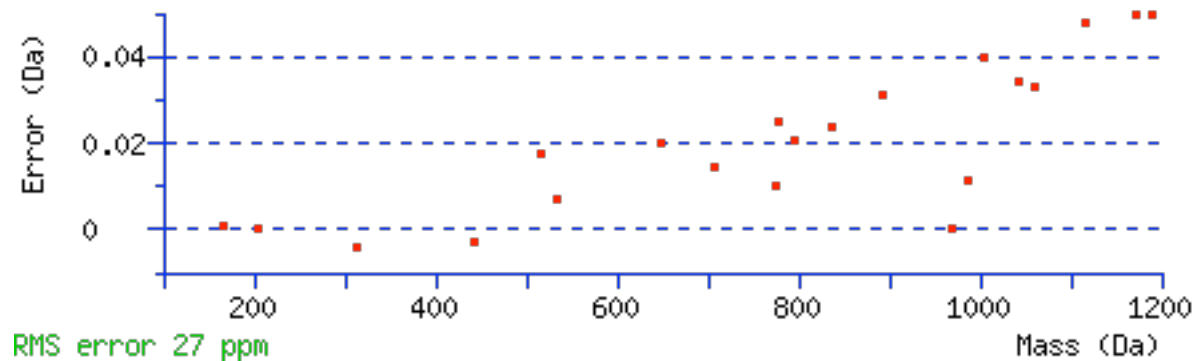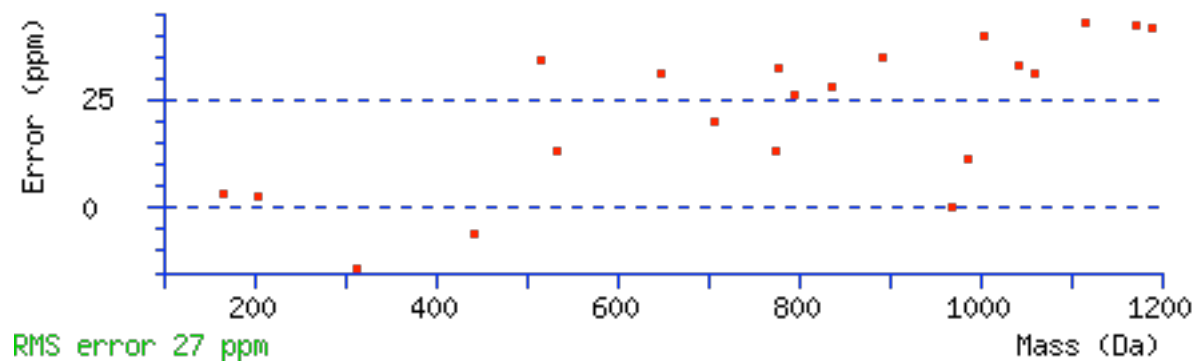

MS/MS Fragmentation of **GFHNGAMEPLKSGFL**

Found in **XP\_785647**, PREDICTED: similar to pedal peptide precursor protein [Strongylocentrotus purpuratus].

Match to Query 682: 1603.811368 from(802.912960,2+) intensity(624924.0000)

Title: Cmpd 170, +MSn(803.4391), 29.6 min

Data file Qtof\_all.mgf



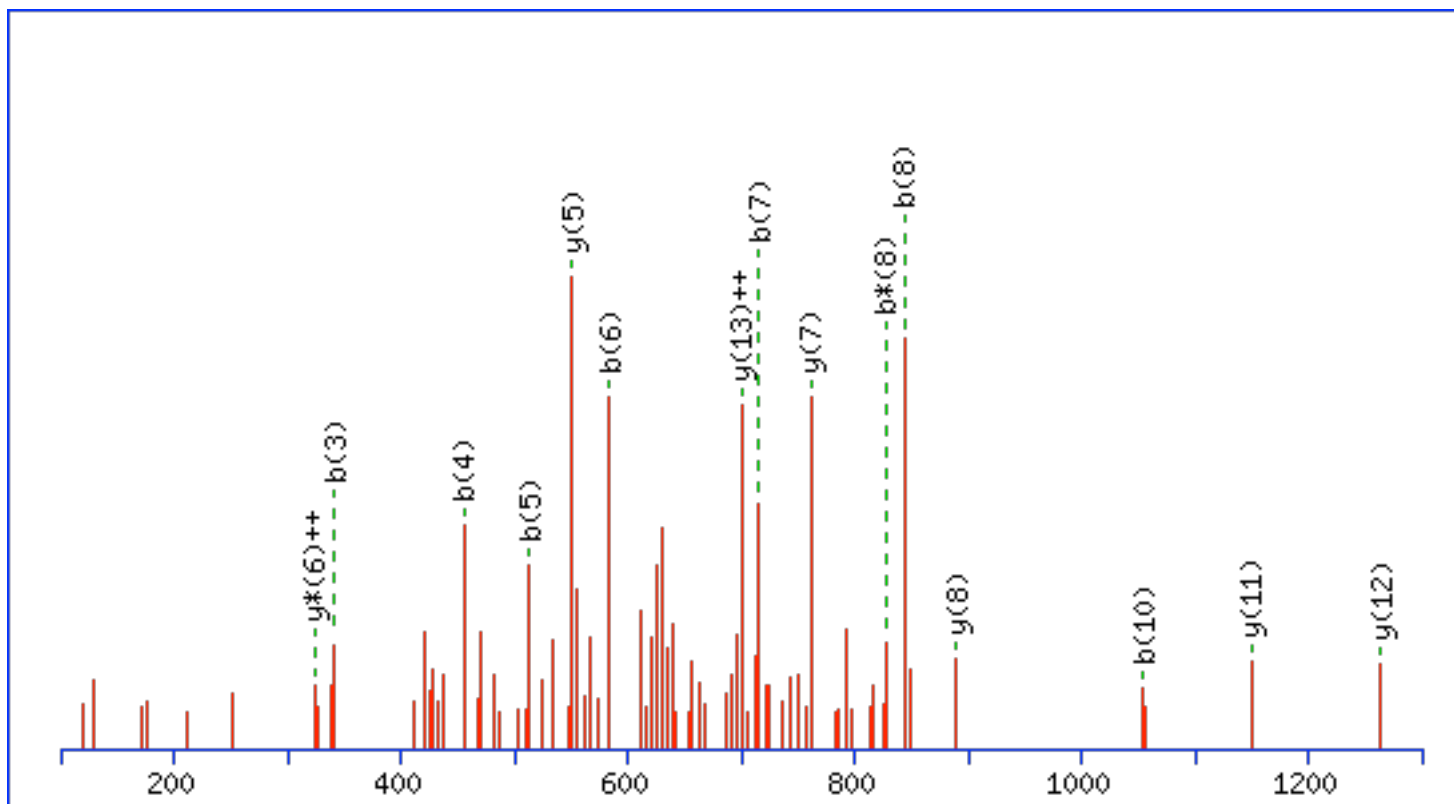

**Monoisotopic mass of neutral peptide Mr(calc): 1603.7817 Ions Score: 51 Expect: 0.099 Matches (Bold Red): 15/134**  
 fragment ions using 23 most intense peaks

| # | b               | b <sup>++</sup> | b <sup>*</sup> | b <sup>*++</sup> | b <sup>0</sup> | b <sup>0++</sup> | Seq. | y                | y <sup>++</sup> | y <sup>*</sup> | y <sup>*++</sup> | y <sup>0</sup> | y <sup>0++</sup> | #  |
|---|-----------------|-----------------|----------------|------------------|----------------|------------------|------|------------------|-----------------|----------------|------------------|----------------|------------------|----|
| 1 | 58.0287         | 29.5180         |                |                  |                |                  | G    |                  |                 |                |                  |                |                  | 15 |
| 2 | 205.0972        | 103.0522        |                |                  |                |                  | F    | 1547.7675        | 774.3874        | 1530.7410      | 765.8741         | 1529.7569      | 765.3821         | 14 |
| 3 | <b>342.1561</b> | 171.5817        |                |                  |                |                  | H    | 1400.6991        | <b>700.8532</b> | 1383.6725      | 692.3399         | 1382.6885      | 691.8479         | 13 |
| 4 | <b>456.1990</b> | 228.6031        | 439.1724       | 220.0899         |                |                  | N    | <b>1263.6402</b> | 632.3237        | 1246.6136      | 623.8105         | 1245.6296      | 623.3184         | 12 |

|           |                  |          |                 |          |           |          |          |                  |          |           |                 |           |          |           |
|-----------|------------------|----------|-----------------|----------|-----------|----------|----------|------------------|----------|-----------|-----------------|-----------|----------|-----------|
| <b>5</b>  | <b>513.2205</b>  | 257.1139 | 496.1939        | 248.6006 |           |          | <b>G</b> | <b>1149.5973</b> | 575.3023 | 1132.5707 | 566.7890        | 1131.5867 | 566.2970 | <b>11</b> |
| <b>6</b>  | <b>584.2576</b>  | 292.6324 | 567.2310        | 284.1191 |           |          | <b>A</b> | 1092.5758        | 546.7915 | 1075.5492 | 538.2783        | 1074.5652 | 537.7863 | <b>10</b> |
| <b>7</b>  | <b>715.2981</b>  | 358.1527 | 698.2715        | 349.6394 |           |          | <b>M</b> | 1021.5387        | 511.2730 | 1004.5121 | 502.7597        | 1003.5281 | 502.2677 | <b>9</b>  |
| <b>8</b>  | <b>844.3406</b>  | 422.6740 | <b>827.3141</b> | 414.1607 | 826.3301  | 413.6687 | <b>E</b> | <b>890.4982</b>  | 445.7527 | 873.4716  | 437.2395        | 872.4876  | 436.7475 | <b>8</b>  |
| <b>9</b>  | 941.3934         | 471.2003 | 924.3669        | 462.6871 | 923.3828  | 462.1951 | <b>P</b> | <b>761.4556</b>  | 381.2314 | 744.4291  | 372.7182        | 743.4450  | 372.2262 | <b>7</b>  |
| <b>10</b> | <b>1054.4775</b> | 527.7424 | 1037.4509       | 519.2291 | 1036.4669 | 518.7371 | <b>L</b> | 664.4028         | 332.7051 | 647.3763  | <b>324.1918</b> | 646.3923  | 323.6998 | <b>6</b>  |
| <b>11</b> | 1182.5724        | 591.7899 | 1165.5459       | 583.2766 | 1164.5619 | 582.7846 | <b>K</b> | <b>551.3188</b>  | 276.1630 | 534.2922  | 267.6498        | 533.3082  | 267.1577 | <b>5</b>  |
| <b>12</b> | 1269.6045        | 635.3059 | 1252.5779       | 626.7926 | 1251.5939 | 626.3006 | <b>S</b> | 423.2238         | 212.1155 |           |                 | 405.2132  | 203.1103 | <b>4</b>  |
| <b>13</b> | 1326.6259        | 663.8166 | 1309.5994       | 655.3033 | 1308.6154 | 654.8113 | <b>G</b> | 336.1918         | 168.5995 |           |                 |           |          | <b>3</b>  |
| <b>14</b> | 1473.6943        | 737.3508 | 1456.6678       | 728.8375 | 1455.6838 | 728.3455 | <b>F</b> | 279.1703         | 140.0888 |           |                 |           |          | <b>2</b>  |
| <b>15</b> |                  |          |                 |          |           |          | <b>L</b> | 132.1019         | 66.5546  |           |                 |           |          | <b>1</b>  |

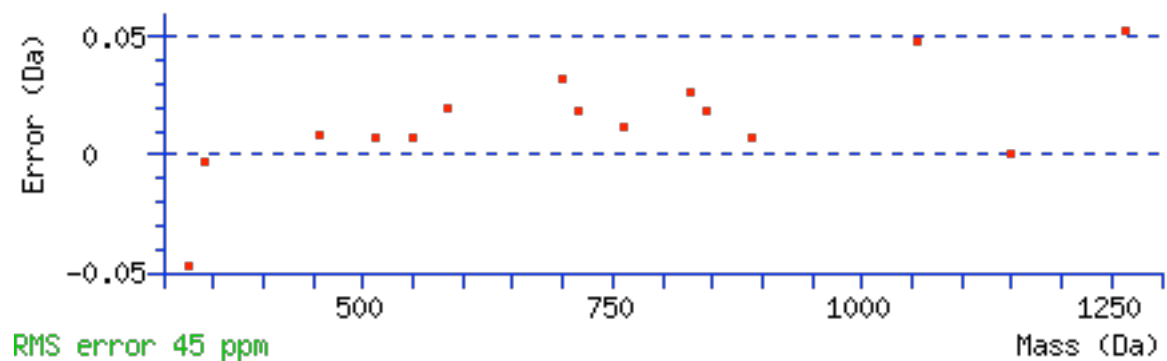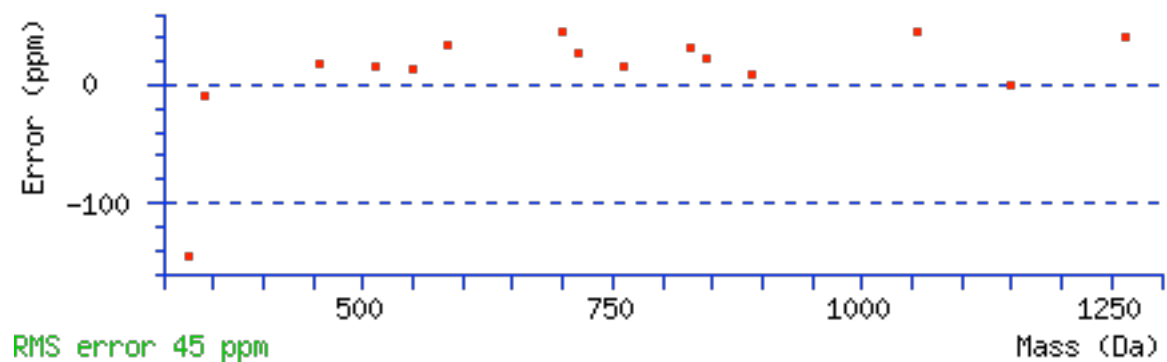

MS/MS Fragmentation of **RFLTGALEPLSSGFI**

Found in **XP\_785647**, PREDICTED: similar to pedal peptide precursor protein [Strongylocentrotus purpuratus].

Match to Query 685: 1606.898788 from(804.456670,2+) intensity(121516.0000)

Title: Cmpd 225, +MSn(804.9464), 34.7 min

Data file Qtof\_all.mgf

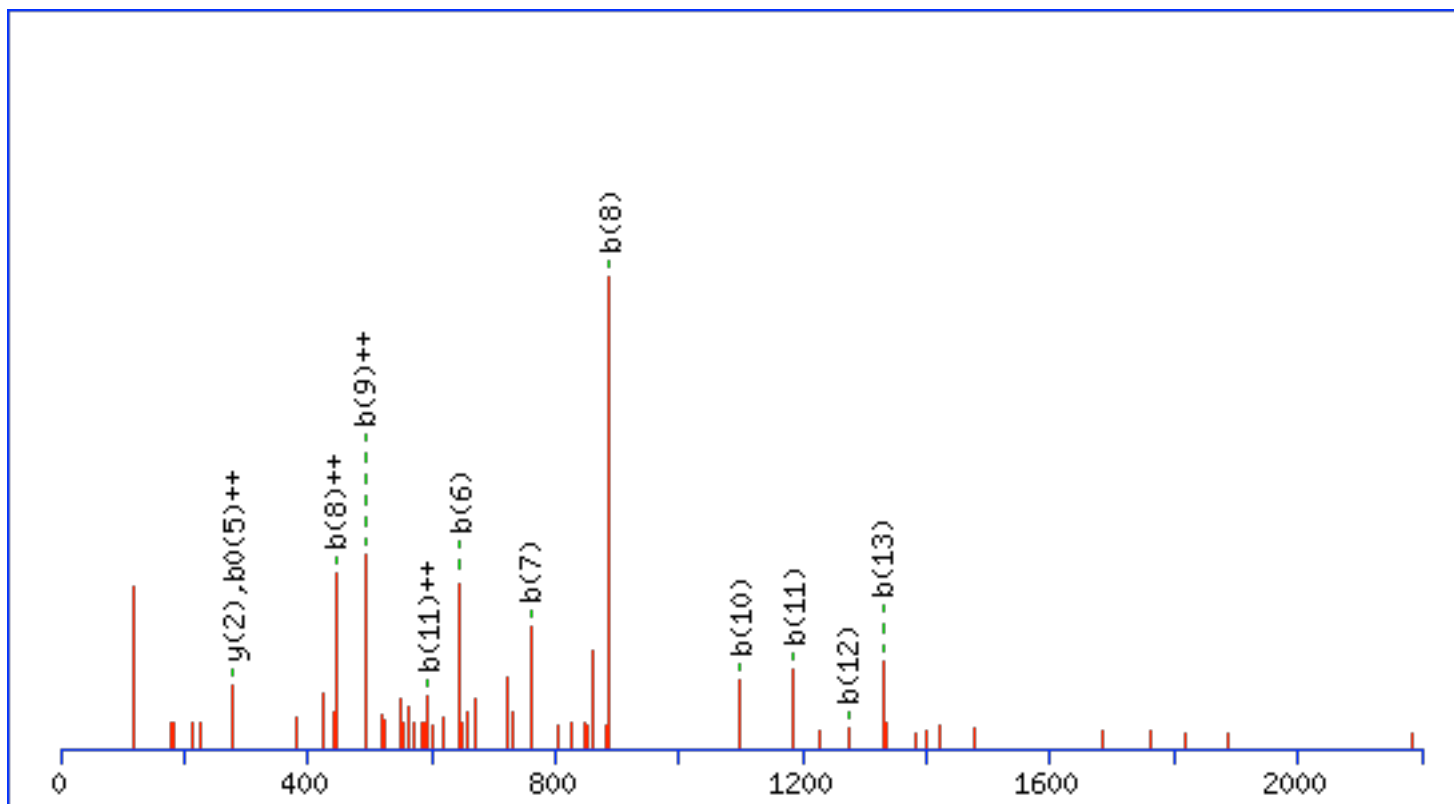

**Monoisotopic mass of neutral peptide Mr(calc): 1606.8719 Ions Score: 56 Expect: 0.024 Matches (Bold Red): 12/128**  
 fragment ions using 17 most intense peaks

| #        | b        | b <sup>++</sup> | b <sup>*</sup> | b <sup>***</sup> | b <sup>0</sup> | b <sup>0++</sup> | Seq.     | y         | y <sup>++</sup> | y <sup>0</sup> | y <sup>0++</sup> | #         |
|----------|----------|-----------------|----------------|------------------|----------------|------------------|----------|-----------|-----------------|----------------|------------------|-----------|
| <b>1</b> | 157.1084 | 79.0578         | 140.0818       | 70.5446          |                |                  | <b>R</b> |           |                 |                |                  | <b>15</b> |
| <b>2</b> | 304.1768 | 152.5920        | 287.1503       | 144.0788         |                |                  | <b>F</b> | 1451.7781 | 726.3927        | 1433.7675      | 717.3874         | <b>14</b> |
| <b>3</b> | 417.2609 | 209.1341        | 400.2343       | 200.6208         |                |                  | <b>L</b> | 1304.7096 | 652.8585        | 1286.6991      | 643.8532         | <b>13</b> |
| <b>4</b> | 518.3085 | 259.6579        | 501.2820       | 251.1446         | 500.2980       | 250.6526         | <b>T</b> | 1191.6256 | 596.3164        | 1173.6150      | 587.3111         | <b>12</b> |

|           |                  |                 |           |          |           |                 |          |                 |          |           |          |           |
|-----------|------------------|-----------------|-----------|----------|-----------|-----------------|----------|-----------------|----------|-----------|----------|-----------|
| <b>5</b>  | 575.3300         | 288.1686        | 558.3035  | 279.6554 | 557.3194  | <b>279.1634</b> | <b>G</b> | 1090.5779       | 545.7926 | 1072.5673 | 536.7873 | <b>11</b> |
| <b>6</b>  | <b>646.3671</b>  | 323.6872        | 629.3406  | 315.1739 | 628.3566  | 314.6819        | <b>A</b> | 1033.5564       | 517.2819 | 1015.5459 | 508.2766 | <b>10</b> |
| <b>7</b>  | <b>759.4512</b>  | 380.2292        | 742.4246  | 371.7160 | 741.4406  | 371.2239        | <b>L</b> | 962.5193        | 481.7633 | 944.5088  | 472.7580 | <b>9</b>  |
| <b>8</b>  | <b>888.4938</b>  | <b>444.7505</b> | 871.4672  | 436.2373 | 870.4832  | 435.7452        | <b>E</b> | 849.4353        | 425.2213 | 831.4247  | 416.2160 | <b>8</b>  |
| <b>9</b>  | 985.5465         | <b>493.2769</b> | 968.5200  | 484.7636 | 967.5360  | 484.2716        | <b>P</b> | 720.3927        | 360.7000 | 702.3821  | 351.6947 | <b>7</b>  |
| <b>10</b> | <b>1098.6306</b> | 549.8189        | 1081.6041 | 541.3057 | 1080.6200 | 540.8137        | <b>L</b> | 623.3399        | 312.1736 | 605.3293  | 303.1683 | <b>6</b>  |
| <b>11</b> | <b>1185.6626</b> | <b>593.3350</b> | 1168.6361 | 584.8217 | 1167.6521 | 584.3297        | <b>S</b> | 510.2558        | 255.6316 | 492.2453  | 246.6263 | <b>5</b>  |
| <b>12</b> | <b>1272.6947</b> | 636.8510        | 1255.6681 | 628.3377 | 1254.6841 | 627.8457        | <b>S</b> | 423.2238        | 212.1155 | 405.2132  | 203.1103 | <b>4</b>  |
| <b>13</b> | <b>1329.7161</b> | 665.3617        | 1312.6896 | 656.8484 | 1311.7056 | 656.3564        | <b>G</b> | 336.1918        | 168.5995 |           |          | <b>3</b>  |
| <b>14</b> | 1476.7845        | 738.8959        | 1459.7580 | 730.3826 | 1458.7740 | 729.8906        | <b>F</b> | <b>279.1703</b> | 140.0888 |           |          | <b>2</b>  |
| <b>15</b> |                  |                 |           |          |           |                 | <b>I</b> | 132.1019        | 66.5546  |           |          | <b>1</b>  |

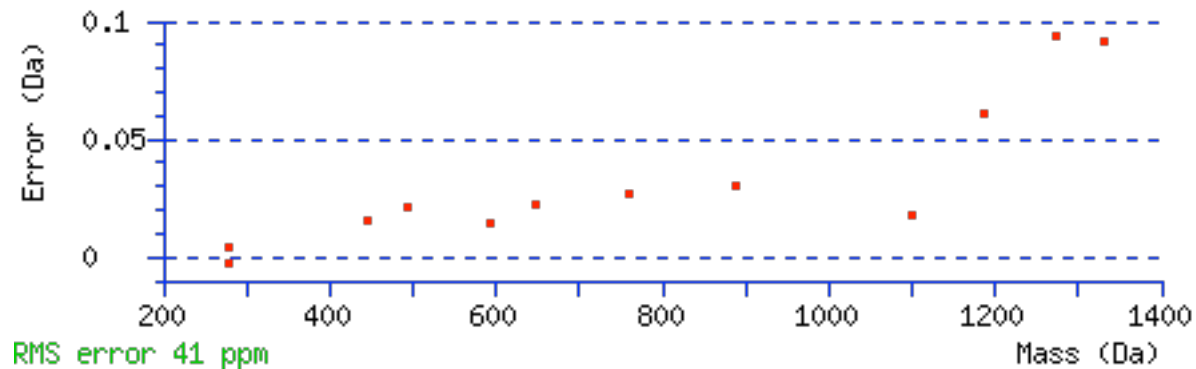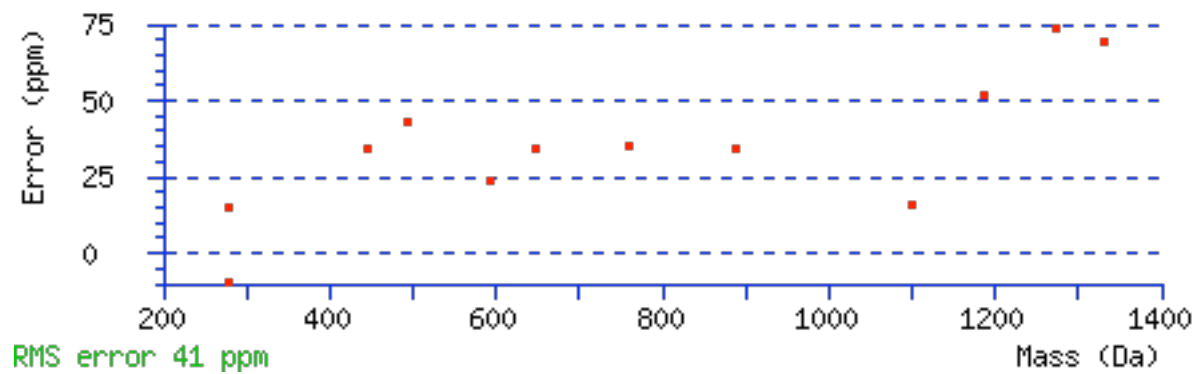

MS/MS Fragmentation of **GFNTGAMEPLGSGFI**

Found in **XP\_785647**, PREDICTED: similar to pedal peptide precursor protein [Strongylocentrotus purpuratus].

Match to Query 622: 1496.712628 from(749.363590,2+) intensity(132832.0000)

Title: Cmpd 235, +MSn(749.8255), 35.5 min

Data file Qtof\_all.mgf

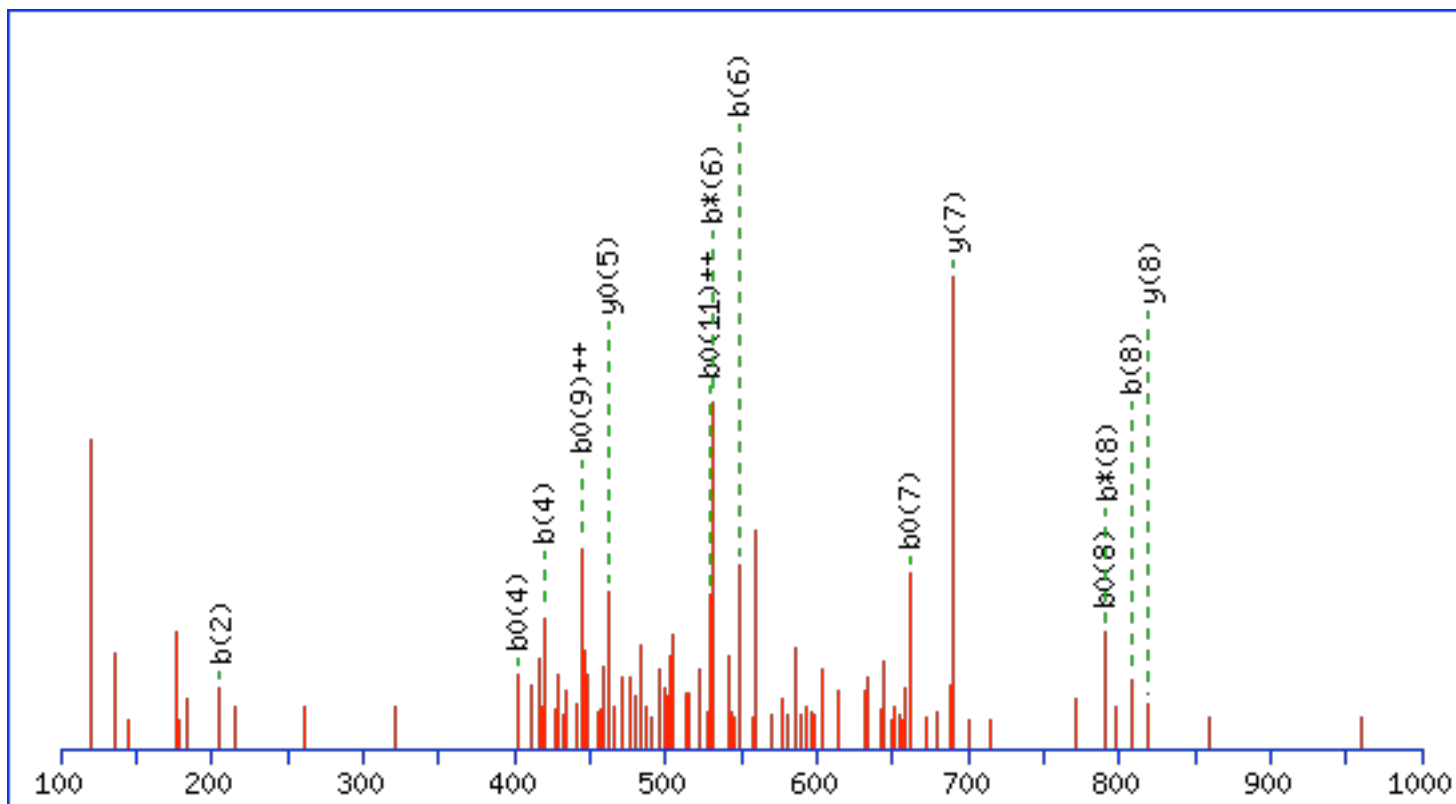

**Monoisotopic mass of neutral peptide Mr(calc):** 1496.6970 **Ions Score:** 11 **Expect:** 1.2e+03 **Matches (Bold Red):** 14/128 fragment ions using 30 most intense peaks

| # | b               | b <sup>++</sup> | b <sup>*</sup> | b <sup>*++</sup> | b <sup>0</sup>  | b <sup>0++</sup> | Seq. | y         | y <sup>++</sup> | y <sup>*</sup> | y <sup>*++</sup> | y <sup>0</sup> | y <sup>0++</sup> | #  |
|---|-----------------|-----------------|----------------|------------------|-----------------|------------------|------|-----------|-----------------|----------------|------------------|----------------|------------------|----|
| 1 | 58.0287         | 29.5180         |                |                  |                 |                  | G    |           |                 |                |                  |                |                  | 15 |
| 2 | <b>205.0972</b> | 103.0522        |                |                  |                 |                  | F    | 1440.6828 | 720.8450        | 1423.6562      | 712.3318         | 1422.6722      | 711.8397         | 14 |
| 3 | 319.1401        | 160.0737        | 302.1135       | 151.5604         |                 |                  | N    | 1293.6144 | 647.3108        | 1276.5878      | 638.7975         | 1275.6038      | 638.3055         | 13 |
| 4 | <b>420.1878</b> | 210.5975        | 403.1612       | 202.0842         | <b>402.1772</b> | 201.5922         | T    | 1179.5714 | 590.2894        |                |                  | 1161.5609      | 581.2841         | 12 |

|           |                 |          |                 |          |                 |                 |          |                 |          |  |  |                 |          |           |
|-----------|-----------------|----------|-----------------|----------|-----------------|-----------------|----------|-----------------|----------|--|--|-----------------|----------|-----------|
| <b>5</b>  | 477.2092        | 239.1082 | 460.1827        | 230.5950 | 459.1987        | 230.1030        | <b>G</b> | 1078.5238       | 539.7655 |  |  | 1060.5132       | 530.7602 | <b>11</b> |
| <b>6</b>  | <b>548.2463</b> | 274.6268 | <b>531.2198</b> | 266.1135 | 530.2358        | 265.6215        | <b>A</b> | 1021.5023       | 511.2548 |  |  | 1003.4917       | 502.2495 | <b>10</b> |
| <b>7</b>  | 679.2868        | 340.1470 | 662.2603        | 331.6338 | <b>661.2763</b> | 331.1418        | <b>M</b> | 950.4652        | 475.7362 |  |  | 932.4546        | 466.7309 | <b>9</b>  |
| <b>8</b>  | <b>808.3294</b> | 404.6683 | <b>791.3029</b> | 396.1551 | <b>790.3189</b> | 395.6631        | <b>E</b> | <b>819.4247</b> | 410.2160 |  |  | 801.4141        | 401.2107 | <b>8</b>  |
| <b>9</b>  | 905.3822        | 453.1947 | 888.3556        | 444.6815 | 887.3716        | <b>444.1894</b> | <b>P</b> | <b>690.3821</b> | 345.6947 |  |  | 672.3715        | 336.6894 | <b>7</b>  |
| <b>10</b> | 1018.4662       | 509.7368 | 1001.4397       | 501.2235 | 1000.4557       | 500.7315        | <b>L</b> | 593.3293        | 297.1683 |  |  | 575.3188        | 288.1630 | <b>6</b>  |
| <b>11</b> | 1075.4877       | 538.2475 | 1058.4612       | 529.7342 | 1057.4771       | <b>529.2422</b> | <b>G</b> | 480.2453        | 240.6263 |  |  | <b>462.2347</b> | 231.6210 | <b>5</b>  |
| <b>12</b> | 1162.5197       | 581.7635 | 1145.4932       | 573.2502 | 1144.5092       | 572.7582        | <b>S</b> | 423.2238        | 212.1155 |  |  | 405.2132        | 203.1103 | <b>4</b>  |
| <b>13</b> | 1219.5412       | 610.2742 | 1202.5147       | 601.7610 | 1201.5306       | 601.2690        | <b>G</b> | 336.1918        | 168.5995 |  |  |                 |          | <b>3</b>  |
| <b>14</b> | 1366.6096       | 683.8084 | 1349.5831       | 675.2952 | 1348.5990       | 674.8032        | <b>F</b> | 279.1703        | 140.0888 |  |  |                 |          | <b>2</b>  |
| <b>15</b> |                 |          |                 |          |                 |                 | <b>I</b> | 132.1019        | 66.5546  |  |  |                 |          | <b>1</b>  |



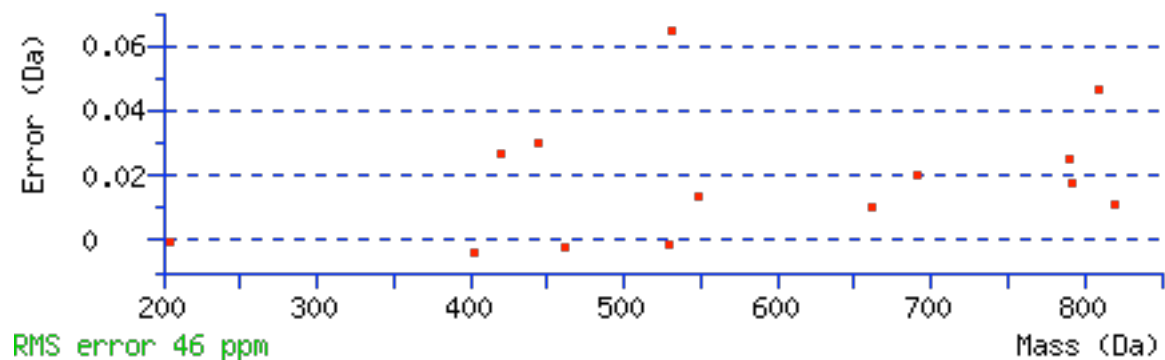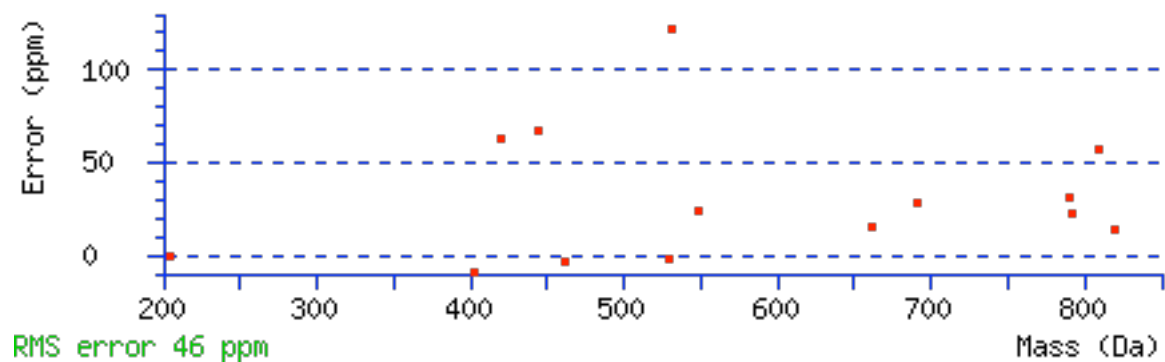

MS/MS Fragmentation of **FLTGALEPLSSGFI**

Found in **XP\_785647**, PREDICTED: similar to pedal peptide precursor protein [Strongylocentrotus purpuratus].

Match to Query 585: 1450.689648 from(726.352100,2+) intensity(170280.0000)

Title: Cmpd 298, +MSn(726.8289), 41.5 min

Data file Qtof\_all.mgf

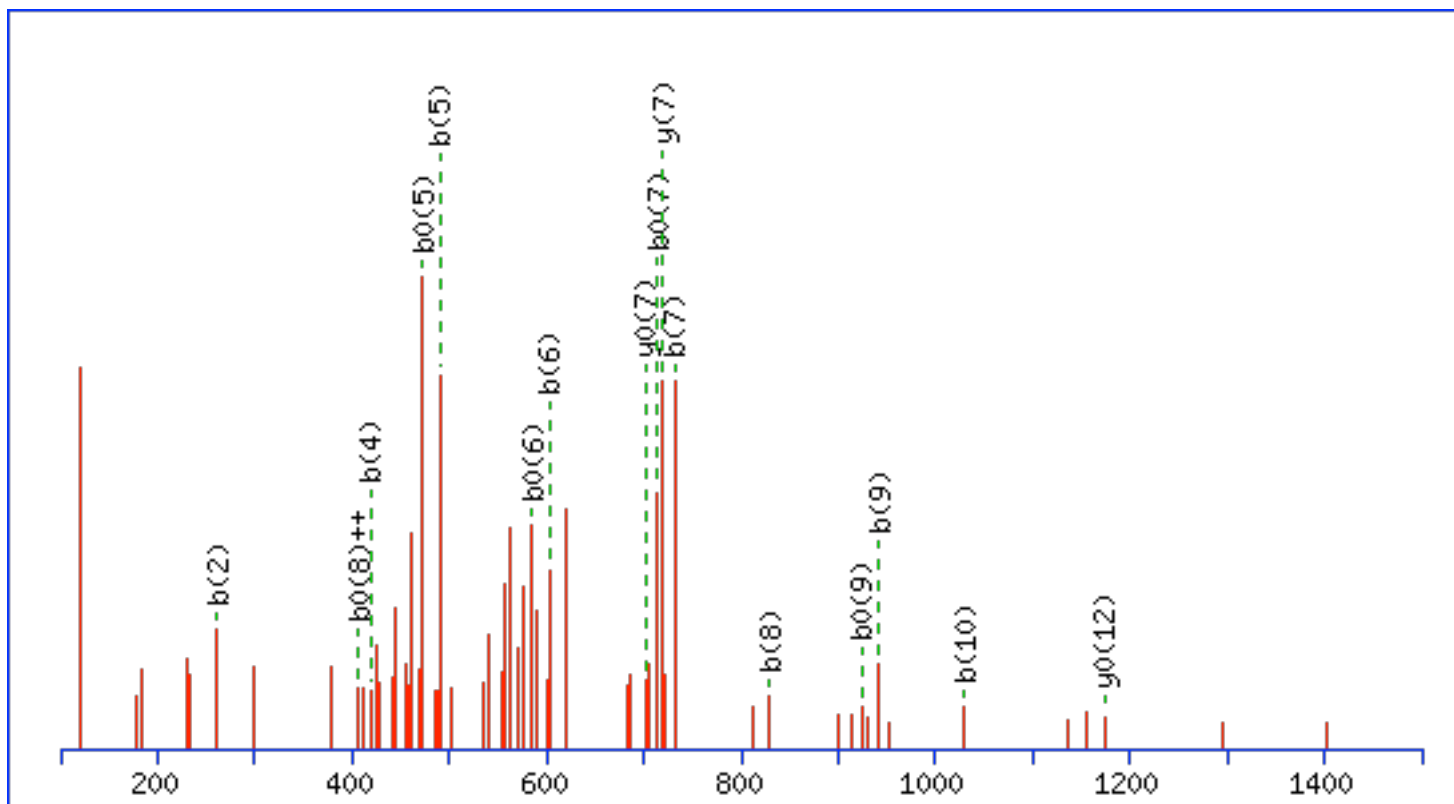

**Monoisotopic mass of neutral peptide Mr(calc): 1450.7708 Ions Score: 42 Expect: 0.82 Matches (Bold Red): 17/94**  
 fragment ions using 44 most intense peaks

| # | b               | b <sup>++</sup> | b <sup>0</sup> | b <sup>0++</sup> | Seq. | y         | y <sup>++</sup> | y <sup>0</sup>   | y <sup>0++</sup> | #  |
|---|-----------------|-----------------|----------------|------------------|------|-----------|-----------------|------------------|------------------|----|
| 1 | 148.0757        | 74.5415         |                |                  | F    |           |                 |                  |                  | 14 |
| 2 | <b>261.1598</b> | 131.0835        |                |                  | L    | 1304.7096 | 652.8585        | 1286.6991        | 643.8532         | 13 |
| 3 | 362.2074        | 181.6074        | 344.1969       | 172.6021         | T    | 1191.6256 | 596.3164        | <b>1173.6150</b> | 587.3111         | 12 |
| 4 | <b>419.2289</b> | 210.1181        | 401.2183       | 201.1128         | G    | 1090.5779 | 545.7926        | 1072.5673        | 536.7873         | 11 |

|           |                  |          |                 |                 |          |                 |          |                 |          |           |
|-----------|------------------|----------|-----------------|-----------------|----------|-----------------|----------|-----------------|----------|-----------|
| <b>5</b>  | <b>490.2660</b>  | 245.6366 | <b>472.2554</b> | 236.6314        | <b>A</b> | 1033.5564       | 517.2819 | 1015.5459       | 508.2766 | <b>10</b> |
| <b>6</b>  | <b>603.3501</b>  | 302.1787 | <b>585.3395</b> | 293.1734        | <b>L</b> | 962.5193        | 481.7633 | 944.5088        | 472.7580 | <b>9</b>  |
| <b>7</b>  | <b>732.3927</b>  | 366.7000 | <b>714.3821</b> | 357.6947        | <b>E</b> | 849.4353        | 425.2213 | 831.4247        | 416.2160 | <b>8</b>  |
| <b>8</b>  | <b>829.4454</b>  | 415.2264 | 811.4349        | <b>406.2211</b> | <b>P</b> | <b>720.3927</b> | 360.7000 | <b>702.3821</b> | 351.6947 | <b>7</b>  |
| <b>9</b>  | <b>942.5295</b>  | 471.7684 | <b>924.5189</b> | 462.7631        | <b>L</b> | 623.3399        | 312.1736 | 605.3293        | 303.1683 | <b>6</b>  |
| <b>10</b> | <b>1029.5615</b> | 515.2844 | 1011.5510       | 506.2791        | <b>S</b> | 510.2558        | 255.6316 | 492.2453        | 246.6263 | <b>5</b>  |
| <b>11</b> | 1116.5936        | 558.8004 | 1098.5830       | 549.7951        | <b>S</b> | 423.2238        | 212.1155 | 405.2132        | 203.1103 | <b>4</b>  |
| <b>12</b> | <b>1173.6150</b> | 587.3111 | 1155.6045       | 578.3059        | <b>G</b> | 336.1918        | 168.5995 |                 |          | <b>3</b>  |
| <b>13</b> | 1320.6834        | 660.8454 | 1302.6729       | 651.8401        | <b>F</b> | 279.1703        | 140.0888 |                 |          | <b>2</b>  |
| <b>14</b> |                  |          |                 |                 | <b>I</b> | 132.1019        | 66.5546  |                 |          | <b>1</b>  |

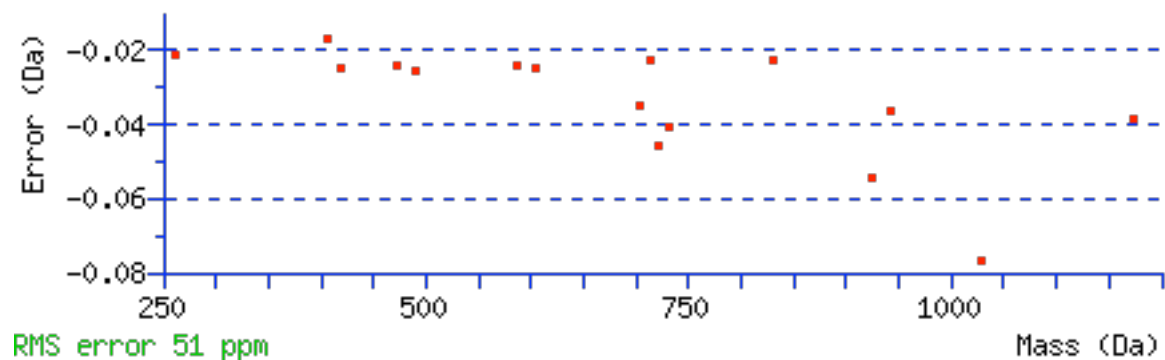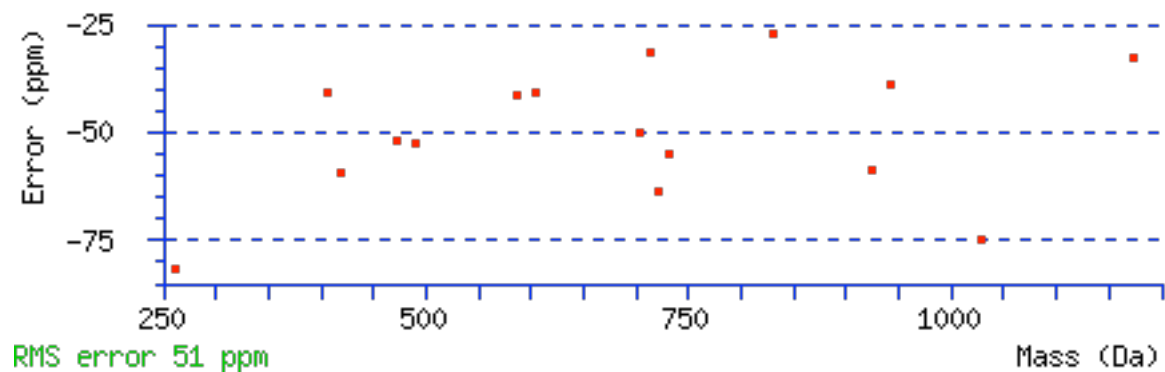

MS/MS Fragmentation of **DFNTGAMEPLGSGFI**

Found in **XP\_785647**, PREDICTED: similar to pedal peptide precursor protein [Strongylocentrotus purpuratus].

Match to Query 664: 1554.726348 from(778.370450,2+) intensity(109704.0000)

Title: Cmpd 244, +MSn(778.8585), 36.3 min

Data file Qtof\_all.mgf

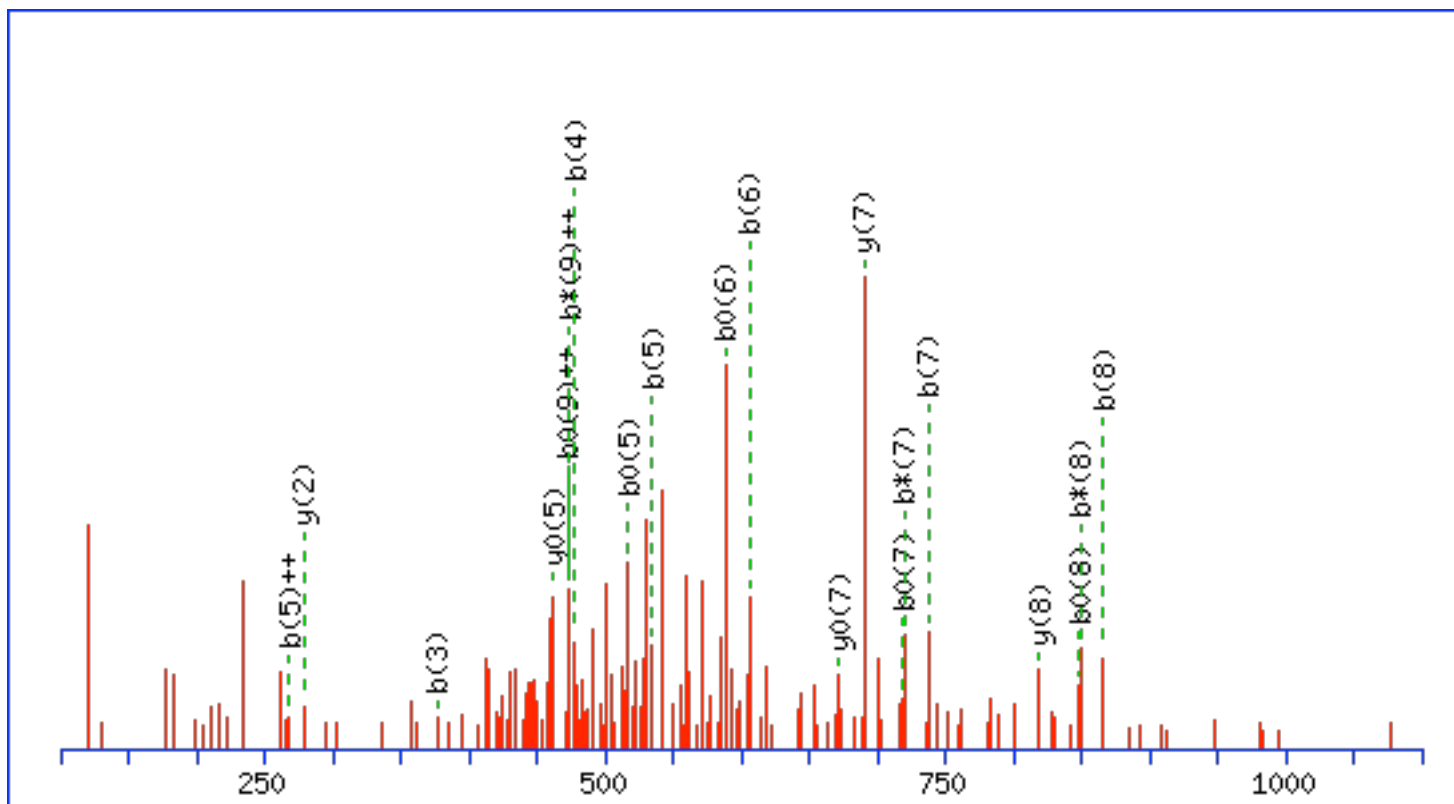

**Monoisotopic mass of neutral peptide Mr(calc): 1554.7025 Ions Score: 11 Expect: 9.3e+02 Matches (Bold Red):**  
 20/134 fragment ions using 70 most intense peaks

| # | b               | b <sup>++</sup> | b <sup>*</sup> | b <sup>***</sup> | b <sup>0</sup> | b <sup>0++</sup> | Seq. | y         | y <sup>++</sup> | y <sup>*</sup> | y <sup>***</sup> | y <sup>0</sup> | y <sup>0++</sup> | #  |
|---|-----------------|-----------------|----------------|------------------|----------------|------------------|------|-----------|-----------------|----------------|------------------|----------------|------------------|----|
| 1 | 116.0342        | 58.5207         |                |                  | 98.0237        | 49.5155          | D    |           |                 |                |                  |                |                  | 15 |
| 2 | 263.1026        | 132.0550        |                |                  | 245.0921       | 123.0497         | F    | 1440.6828 | 720.8450        | 1423.6562      | 712.3318         | 1422.6722      | 711.8397         | 14 |
| 3 | <b>377.1456</b> | 189.0764        | 360.1190       | 180.5631         | 359.1350       | 180.0711         | N    | 1293.6144 | 647.3108        | 1276.5878      | 638.7975         | 1275.6038      | 638.3055         | 13 |
| 4 | <b>478.1932</b> | 239.6003        | 461.1667       | 231.0870         | 460.1827       | 230.5950         | T    | 1179.5714 | 590.2894        |                |                  | 1161.5609      | 581.2841         | 12 |

|           |                 |                 |                 |                 |                 |                 |          |                 |          |  |  |                 |          |           |
|-----------|-----------------|-----------------|-----------------|-----------------|-----------------|-----------------|----------|-----------------|----------|--|--|-----------------|----------|-----------|
| <b>5</b>  | <b>535.2147</b> | <b>268.1110</b> | 518.1882        | 259.5977        | <b>517.2041</b> | 259.1057        | <b>G</b> | 1078.5238       | 539.7655 |  |  | 1060.5132       | 530.7602 | <b>11</b> |
| <b>6</b>  | <b>606.2518</b> | 303.6295        | 589.2253        | 295.1163        | <b>588.2413</b> | 294.6243        | <b>A</b> | 1021.5023       | 511.2548 |  |  | 1003.4917       | 502.2495 | <b>10</b> |
| <b>7</b>  | <b>737.2923</b> | 369.1498        | <b>720.2658</b> | 360.6365        | <b>719.2817</b> | 360.1445        | <b>M</b> | 950.4652        | 475.7362 |  |  | 932.4546        | 466.7309 | <b>9</b>  |
| <b>8</b>  | <b>866.3349</b> | 433.6711        | <b>849.3083</b> | 425.1578        | <b>848.3243</b> | 424.6658        | <b>E</b> | <b>819.4247</b> | 410.2160 |  |  | 801.4141        | 401.2107 | <b>8</b>  |
| <b>9</b>  | 963.3877        | 482.1975        | 946.3611        | <b>473.6842</b> | 945.3771        | <b>473.1922</b> | <b>P</b> | <b>690.3821</b> | 345.6947 |  |  | <b>672.3715</b> | 336.6894 | <b>7</b>  |
| <b>10</b> | 1076.4717       | 538.7395        | 1059.4452       | 530.2262        | 1058.4612       | 529.7342        | <b>L</b> | 593.3293        | 297.1683 |  |  | 575.3188        | 288.1630 | <b>6</b>  |
| <b>11</b> | 1133.4932       | 567.2502        | 1116.4666       | 558.7370        | 1115.4826       | 558.2449        | <b>G</b> | 480.2453        | 240.6263 |  |  | <b>462.2347</b> | 231.6210 | <b>5</b>  |
| <b>12</b> | 1220.5252       | 610.7662        | 1203.4987       | 602.2530        | 1202.5147       | 601.7610        | <b>S</b> | 423.2238        | 212.1155 |  |  | 405.2132        | 203.1103 | <b>4</b>  |
| <b>13</b> | 1277.5467       | 639.2770        | 1260.5201       | 630.7637        | 1259.5361       | 630.2717        | <b>G</b> | 336.1918        | 168.5995 |  |  |                 |          | <b>3</b>  |
| <b>14</b> | 1424.6151       | 712.8112        | 1407.5885       | 704.2979        | 1406.6045       | 703.8059        | <b>F</b> | <b>279.1703</b> | 140.0888 |  |  |                 |          | <b>2</b>  |
| <b>15</b> |                 |                 |                 |                 |                 |                 | <b>I</b> | 132.1019        | 66.5546  |  |  |                 |          | <b>1</b>  |

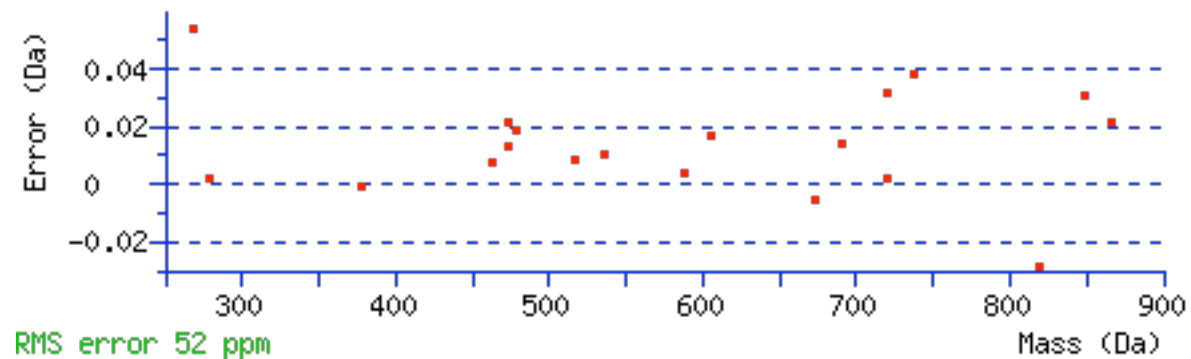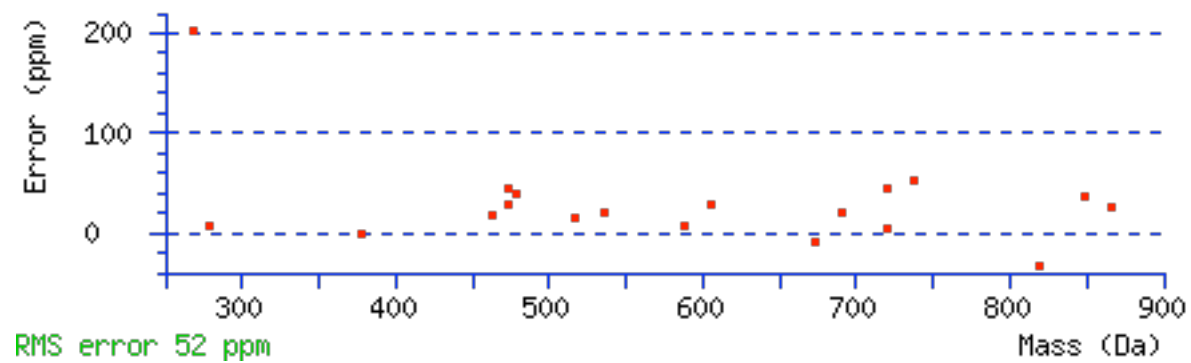

MS/MS Fragmentation of **GFNNGAMEPLGSGFI**

Found in **gil115974537**, ref|XP\_001118|PREDICTED:similartopedalpeptideprecursorprotein[Strongylocentrotuspurpuratus]

Match to Query 634: 1509.603008 from(755.808780,2+) intensity(175652.0000)

Title: Cmpd 268, +MSn(755.6070), 38.6 min

Data file Qtof\_all.mgf

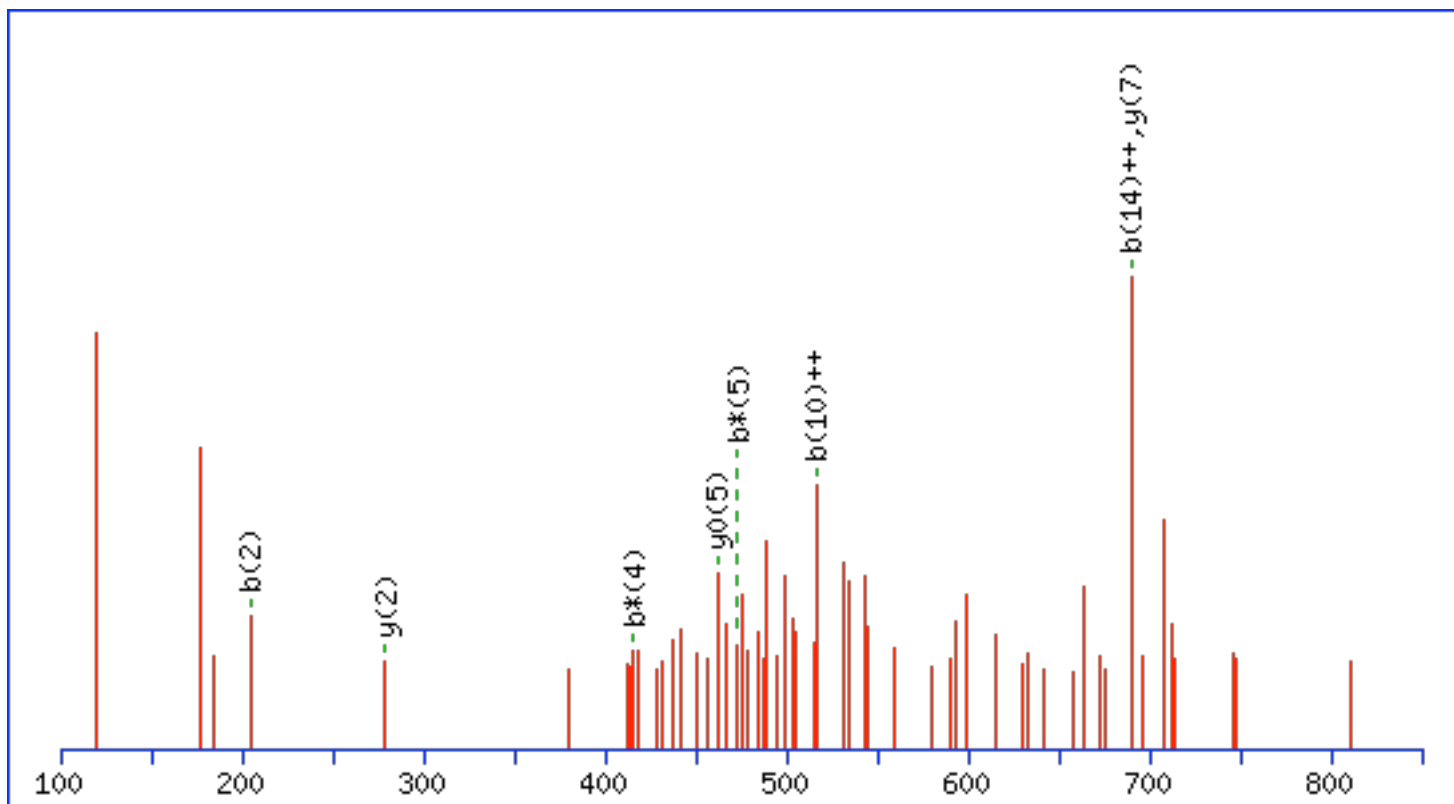

**Monoisotopic mass of neutral peptide Mr(calc):** 1509.6922 **Ions Score:** 4 **Expect:** 9.7 **Matches (Bold Red):** 8/122  
 fragment ions using 24 most intense peaks

| # | b               | b <sup>++</sup> | b <sup>*</sup>  | b <sup>*++</sup> | b <sup>0</sup> | b <sup>0++</sup> | Seq. | y         | y <sup>++</sup> | y <sup>*</sup> | y <sup>*++</sup> | y <sup>0</sup> | y <sup>0++</sup> | #  |
|---|-----------------|-----------------|-----------------|------------------|----------------|------------------|------|-----------|-----------------|----------------|------------------|----------------|------------------|----|
| 1 | 58.0287         | 29.5180         |                 |                  |                |                  | G    |           |                 |                |                  |                |                  | 15 |
| 2 | <b>205.0972</b> | 103.0522        |                 |                  |                |                  | F    | 1453.6780 | 727.3427        | 1436.6515      | 718.8294         | 1435.6675      | 718.3374         | 14 |
| 3 | 319.1401        | 160.0737        | 302.1135        | 151.5604         |                |                  | N    | 1306.6096 | 653.8084        | 1289.5831      | 645.2952         | 1288.5990      | 644.8032         | 13 |
| 4 | 433.1830        | 217.0951        | <b>416.1565</b> | 208.5819         |                |                  | N    | 1192.5667 | 596.7870        | 1175.5401      | 588.2737         | 1174.5561      | 587.7817         | 12 |



|           |           |                 |                 |          |           |          |          |                 |          |  |  |                 |          |           |
|-----------|-----------|-----------------|-----------------|----------|-----------|----------|----------|-----------------|----------|--|--|-----------------|----------|-----------|
| <b>5</b>  | 490.2045  | 245.6059        | <b>473.1779</b> | 237.0926 |           |          | <b>G</b> | 1078.5238       | 539.7655 |  |  | 1060.5132       | 530.7602 | <b>11</b> |
| <b>6</b>  | 561.2416  | 281.1244        | 544.2150        | 272.6112 |           |          | <b>A</b> | 1021.5023       | 511.2548 |  |  | 1003.4917       | 502.2495 | <b>10</b> |
| <b>7</b>  | 692.2821  | 346.6447        | 675.2555        | 338.1314 |           |          | <b>M</b> | 950.4652        | 475.7362 |  |  | 932.4546        | 466.7309 | <b>9</b>  |
| <b>8</b>  | 821.3247  | 411.1660        | 804.2981        | 402.6527 | 803.3141  | 402.1607 | <b>E</b> | 819.4247        | 410.2160 |  |  | 801.4141        | 401.2107 | <b>8</b>  |
| <b>9</b>  | 918.3774  | 459.6924        | 901.3509        | 451.1791 | 900.3669  | 450.6871 | <b>P</b> | <b>690.3821</b> | 345.6947 |  |  | 672.3715        | 336.6894 | <b>7</b>  |
| <b>10</b> | 1031.4615 | <b>516.2344</b> | 1014.4349       | 507.7211 | 1013.4509 | 507.2291 | <b>L</b> | 593.3293        | 297.1683 |  |  | 575.3188        | 288.1630 | <b>6</b>  |
| <b>11</b> | 1088.4830 | 544.7451        | 1071.4564       | 536.2318 | 1070.4724 | 535.7398 | <b>G</b> | 480.2453        | 240.6263 |  |  | <b>462.2347</b> | 231.6210 | <b>5</b>  |
| <b>12</b> | 1175.5150 | 588.2611        | 1158.4884       | 579.7479 | 1157.5044 | 579.2558 | <b>S</b> | 423.2238        | 212.1155 |  |  | 405.2132        | 203.1103 | <b>4</b>  |
| <b>13</b> | 1232.5364 | 616.7719        | 1215.5099       | 608.2586 | 1214.5259 | 607.7666 | <b>G</b> | 336.1918        | 168.5995 |  |  |                 |          | <b>3</b>  |
| <b>14</b> | 1379.6049 | <b>690.3061</b> | 1362.5783       | 681.7928 | 1361.5943 | 681.3008 | <b>F</b> | <b>279.1703</b> | 140.0888 |  |  |                 |          | <b>2</b>  |
| <b>15</b> |           |                 |                 |          |           |          | <b>I</b> | 132.1019        | 66.5546  |  |  |                 |          | <b>1</b>  |

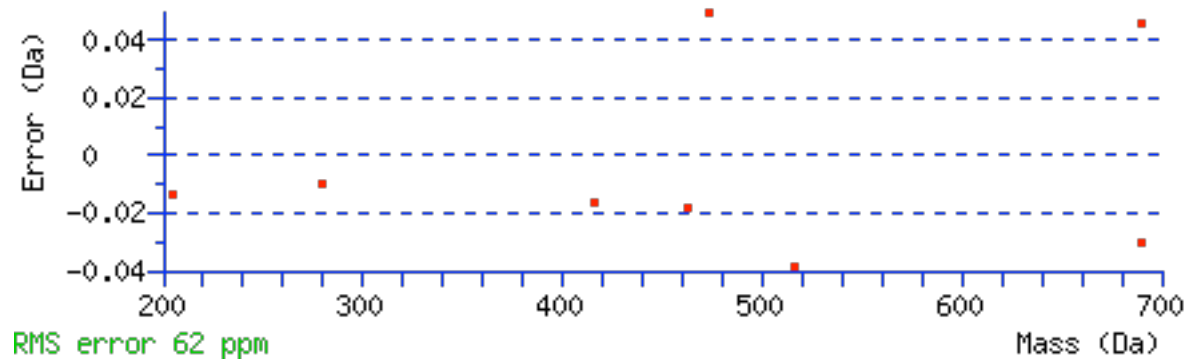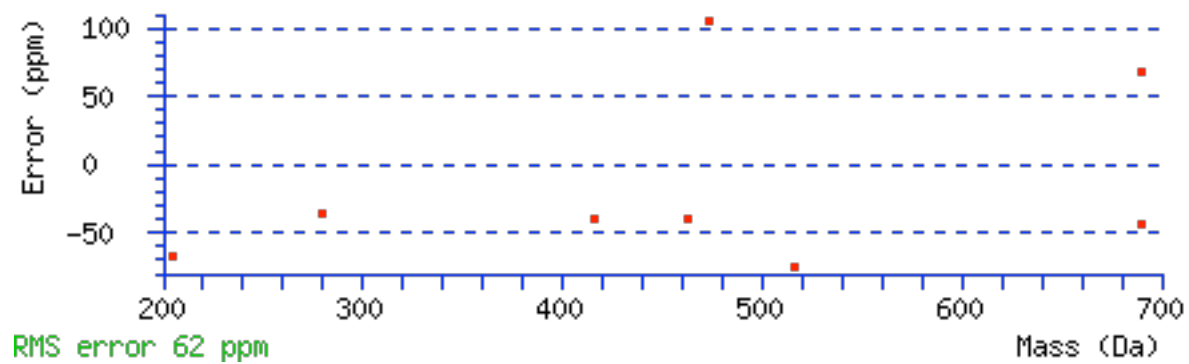

MS/MS Fragmentation of **GFHAGAMEPLSSGFID**

Found in **XP\_785647**, PREDICTED: similar to pedal peptide precursor protein [Strongylocentrotus purpuratus].

Match to Query 294: 1633.430048 from(817.722300,2+) intensity(2903.1006)

Data file Maldi\_All.mgf

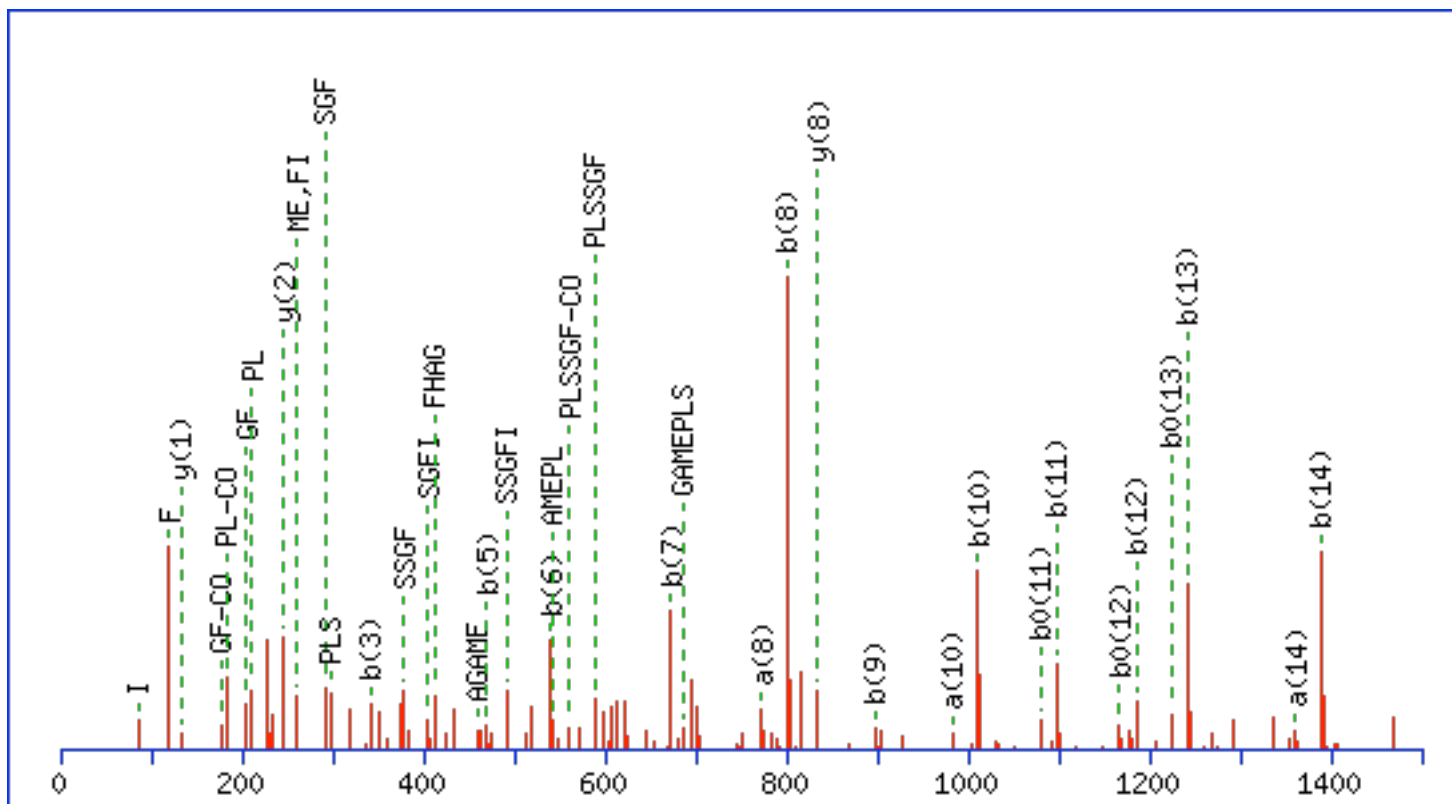

**Monoisotopic mass of neutral peptide Mr(calc):** 1633.7559 **Variable modifications:** C-term : Amidated (C-term) **Ions Score:** 85 **Expect:** 7.6e-05 **Matches (Bold Red):** 45/212 fragment ions using 70 most intense peaks

| # | Immon.          | a               | a <sup>0</sup> | b               | b <sup>0</sup> | Seq. | y         | y <sup>0</sup> | #  |
|---|-----------------|-----------------|----------------|-----------------|----------------|------|-----------|----------------|----|
| 1 | 30.0338         | 30.0338         |                | 58.0287         |                | G    |           |                | 16 |
| 2 | <b>120.0808</b> | <b>177.1022</b> |                | <b>205.0972</b> |                | F    | 1577.7417 | 1559.7311      | 15 |
| 3 | 110.0713        | 314.1612        |                | <b>342.1561</b> |                | H    | 1430.6733 | 1412.6627      | 14 |
| 4 | 44.0495         | 385.1983        |                | <b>413.1932</b> |                | A    | 1293.6144 | 1275.6038      | 13 |

|    |                 |                  |           |                  |                  |   |                 |           |           |
|----|-----------------|------------------|-----------|------------------|------------------|---|-----------------|-----------|-----------|
| 5  | 30.0338         | 442.2197         |           | <b>470.2146</b>  |                  | G | 1222.5772       | 1204.5667 | <b>12</b> |
| 6  | 44.0495         | 513.2568         |           | <b>541.2518</b>  |                  | A | 1165.5558       | 1147.5452 | <b>11</b> |
| 7  | 104.0528        | 644.2973         |           | <b>672.2922</b>  |                  | M | 1094.5187       | 1076.5081 | <b>10</b> |
| 8  | 102.0550        | <b>773.3399</b>  | 755.3294  | <b>801.3348</b>  | 783.3243         | E | 963.4782        | 945.4676  | <b>9</b>  |
| 9  | 70.0651         | 870.3927         | 852.3821  | <b>898.3876</b>  | 880.3770         | P | <b>834.4356</b> | 816.4250  | <b>8</b>  |
| 10 | <b>86.0964</b>  | <b>983.4767</b>  | 965.4662  | <b>1011.4717</b> | 993.4611         | L | 737.3828        | 719.3723  | <b>7</b>  |
| 11 | 60.0444         | 1070.5088        | 1052.4982 | <b>1098.5037</b> | <b>1080.4931</b> | S | 624.2988        | 606.2882  | <b>6</b>  |
| 12 | 60.0444         | 1157.5408        | 1139.5302 | <b>1185.5357</b> | <b>1167.5252</b> | S | 537.2667        | 519.2562  | <b>5</b>  |
| 13 | 30.0338         | 1214.5623        | 1196.5517 | <b>1242.5572</b> | <b>1224.5466</b> | G | 450.2347        | 432.2241  | <b>4</b>  |
| 14 | <b>120.0808</b> | <b>1361.6307</b> | 1343.6201 | <b>1389.6256</b> | 1371.6150        | F | 393.2132        | 375.2027  | <b>3</b>  |
| 15 | <b>86.0964</b>  | 1474.7147        | 1456.7042 | 1502.7097        | 1484.6991        | I | <b>246.1448</b> | 228.1343  | <b>2</b>  |
| 16 | 88.0393         |                  |           |                  |                  | D | <b>133.0608</b> | 115.0502  | <b>1</b>  |

| Seq           | ya       | yb       | Seq            | ya       | yb              | Seq          | ya       | yb              |
|---------------|----------|----------|----------------|----------|-----------------|--------------|----------|-----------------|
| <b>FH</b>     | 257.1397 | 285.1346 | <b>FHA</b>     | 328.1768 | 356.1717        | <b>FHAG</b>  | 385.1983 | <b>413.1932</b> |
| <b>FHAGA</b>  | 456.2354 | 484.2303 | <b>FHAGAM</b>  | 587.2759 | 615.2708        | <b>HA</b>    | 181.1084 | 209.1033        |
| <b>HAG</b>    | 238.1299 | 266.1248 | <b>HAGA</b>    | 309.1670 | 337.1619        | <b>HAGAM</b> | 440.2074 | 468.2024        |
| <b>HAGAME</b> | 569.2500 | 597.2450 | <b>HAGAMEP</b> | 666.3028 | 694.2977        | <b>AG</b>    | 101.0709 | 129.0659        |
| <b>AGA</b>    | 172.1081 | 200.1030 | <b>AGAM</b>    | 303.1485 | 331.1435        | <b>AGAME</b> | 432.1911 | <b>460.1860</b> |
| <b>AGAMEP</b> | 529.2439 | 557.2388 | <b>AGAMEPL</b> | 642.3280 | 670.3229        | <b>GA</b>    | 101.0709 | 129.0659        |
| <b>GAM</b>    | 232.1114 | 260.1063 | <b>GAME</b>    | 361.1540 | 389.1489        | <b>GAMEP</b> | 458.2068 | 486.2017        |
| <b>GAMEPL</b> | 571.2908 | 599.2858 | <b>GAMEPLS</b> | 658.3229 | <b>686.3178</b> | <b>AM</b>    | 175.0900 | 203.0849        |
| <b>AME</b>    | 304.1326 | 332.1275 | <b>AMEP</b>    | 401.1853 | 429.1802        | <b>AMEPL</b> | 514.2694 | <b>542.2643</b> |
| <b>AMEPLS</b> | 601.3014 | 629.2963 | <b>AMEPLSS</b> | 688.3334 | 716.3284        | <b>ME</b>    | 233.0954 | <b>261.0904</b> |
| <b>MEP</b>    | 330.1482 | 358.1431 | <b>MEPL</b>    | 443.2323 | 471.2272        | <b>MEPLS</b> | 530.2643 | 558.2592        |

|               |                 |                 |                |          |                 |              |                 |                 |
|---------------|-----------------|-----------------|----------------|----------|-----------------|--------------|-----------------|-----------------|
| <b>MEPLSS</b> | 617.2963        | 645.2912        | <b>MEPLSSG</b> | 674.3178 | 702.3127        | <b>EP</b>    | 199.1077        | 227.1026        |
| <b>EPL</b>    | 312.1918        | 340.1867        | <b>EPLS</b>    | 399.2238 | 427.2187        | <b>EPLSS</b> | 486.2558        | 514.2508        |
| <b>EPLSSG</b> | 543.2773        | 571.2722        | <b>EPLSSGF</b> | 690.3457 | 718.3406        | <b>PL</b>    | <b>183.1492</b> | <b>211.1441</b> |
| <b>PLS</b>    | 270.1812        | <b>298.1761</b> | <b>PLSS</b>    | 357.2132 | 385.2082        | <b>PLSSG</b> | 414.2347        | 442.2296        |
| <b>PLSSGF</b> | <b>561.3031</b> | <b>589.2980</b> | <b>PLSSGFI</b> | 674.3872 | 702.3821        | <b>LS</b>    | 173.1285        | 201.1234        |
| <b>LSS</b>    | 260.1605        | 288.1554        | <b>LSSG</b>    | 317.1819 | 345.1769        | <b>LSSGF</b> | 464.2504        | <b>492.2453</b> |
| <b>LSSGFI</b> | 577.3344        | 605.3293        | <b>SS</b>      | 147.0764 | 175.0713        | <b>SSG</b>   | 204.0979        | 232.0928        |
| <b>SSGF</b>   | 351.1663        | <b>379.1612</b> | <b>SSGFI</b>   | 464.2504 | <b>492.2453</b> | <b>SG</b>    | 117.0659        | 145.0608        |
| <b>SGF</b>    | 264.1343        | <b>292.1292</b> | <b>SGFI</b>    | 377.2183 | <b>405.2132</b> | <b>GF</b>    | <b>177.1022</b> | <b>205.0972</b> |
| <b>GFI</b>    | 290.1863        | 318.1812        | <b>FI</b>      | 233.1648 | <b>261.1598</b> |              |                 |                 |

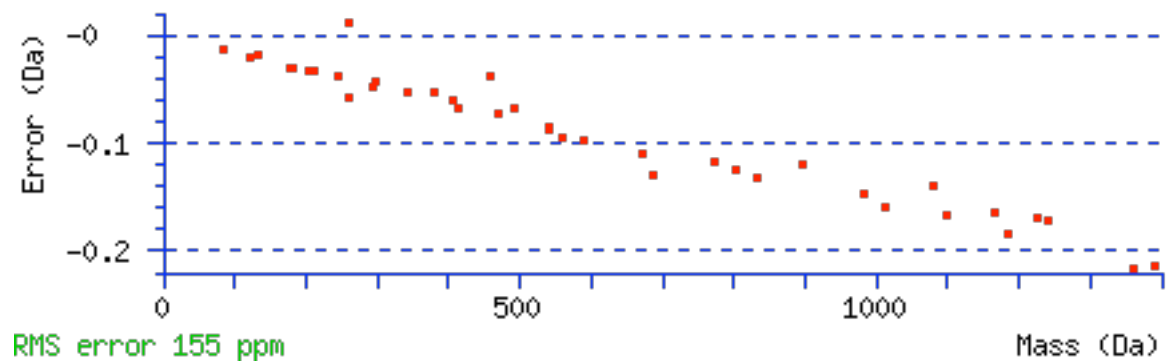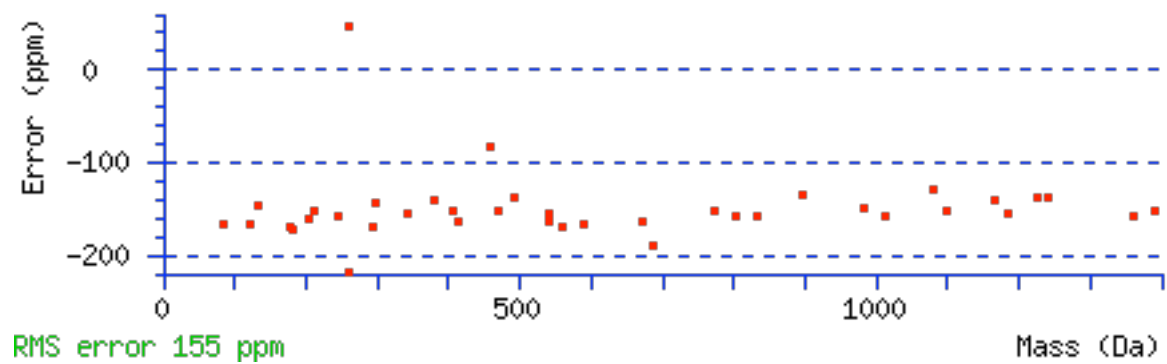

MS/MS Fragmentation of **GFYNGAMEPLSAGFHQ**

Found in **XP\_785647**, PREDICTED: similar to pedal peptide precursor protein [Strongylocentrotus purpuratus].

Match to Query 317: 1723.435048 from(862.724800,2+) intensity(5856.6147)

Data file Maldi\_All.mgf

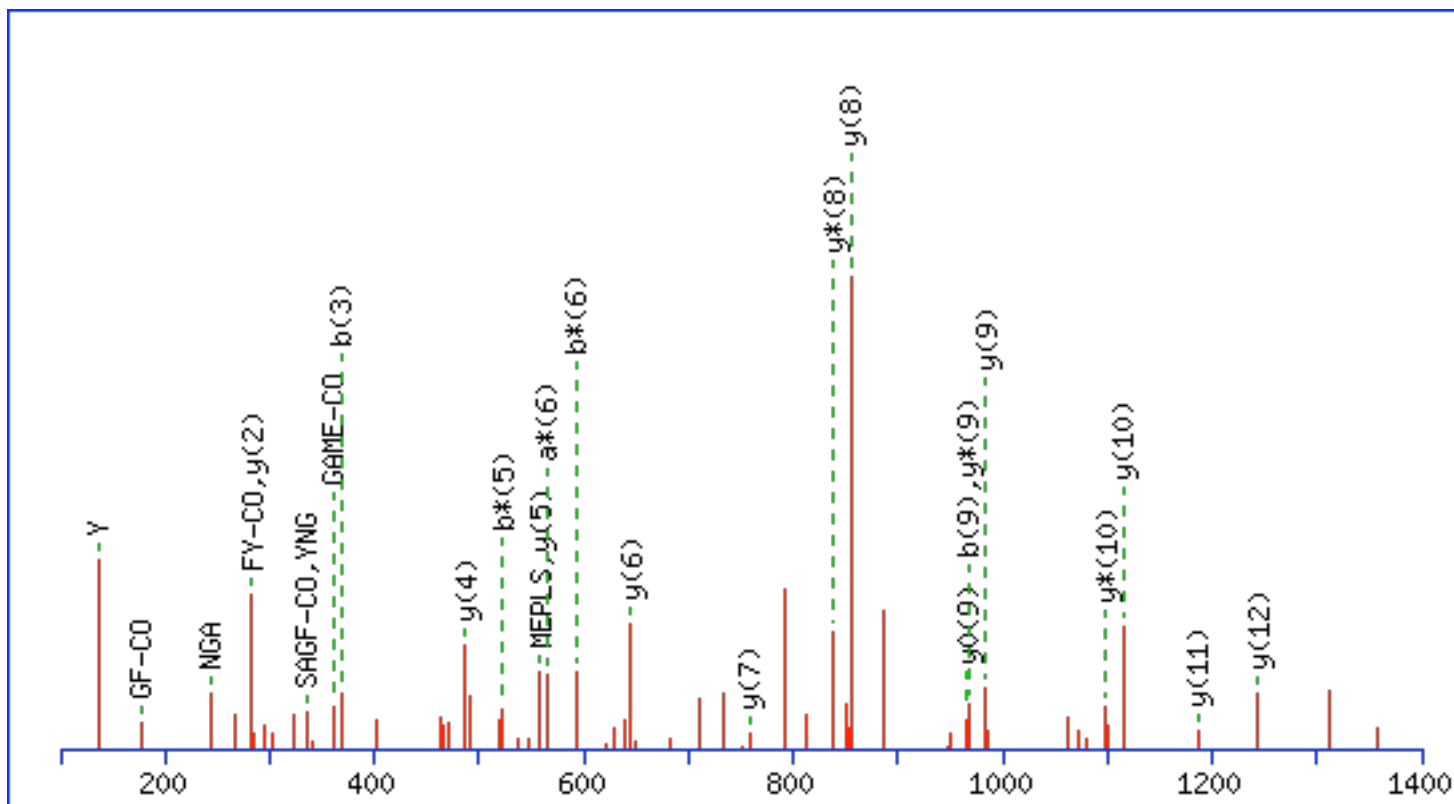

**Monoisotopic mass of neutral peptide Mr(calc): 1723.7777 Variable modifications: C-term : Amidated (C-term) Ions Score: 69 Expect: 0.0031 Matches (Bold Red): 28/244 fragment ions using 37 most intense peaks**

| # | Immon.          | a               | a*       | a <sup>0</sup> | b               | b*       | b <sup>0</sup> | Seq. | y         | y*        | y <sup>0</sup> | #  |
|---|-----------------|-----------------|----------|----------------|-----------------|----------|----------------|------|-----------|-----------|----------------|----|
| 1 | 30.0338         | 30.0338         |          |                | 58.0287         |          |                | G    |           |           |                | 16 |
| 2 | 120.0808        | <b>177.1022</b> |          |                | 205.0972        |          |                | F    | 1667.7635 | 1650.7369 | 1649.7529      | 15 |
| 3 | <b>136.0757</b> | 340.1656        |          |                | <b>368.1605</b> |          |                | Y    | 1520.6951 | 1503.6685 | 1502.6845      | 14 |
| 4 | 87.0553         | 454.2085        | 437.1819 |                | 482.2034        | 465.1769 |                | N    | 1357.6317 | 1340.6052 | 1339.6212      | 13 |

|           |          |           |                 |           |                 |                 |           |          |                  |                  |                 |           |
|-----------|----------|-----------|-----------------|-----------|-----------------|-----------------|-----------|----------|------------------|------------------|-----------------|-----------|
| <b>5</b>  | 30.0338  | 511.2300  | 494.2034        |           | 539.2249        | <b>522.1983</b> |           | <b>G</b> | <b>1243.5888</b> | 1226.5623        | 1225.5782       | <b>12</b> |
| <b>6</b>  | 44.0495  | 582.2671  | <b>565.2405</b> |           | 610.2620        | <b>593.2354</b> |           | <b>A</b> | <b>1186.5673</b> | 1169.5408        | 1168.5568       | <b>11</b> |
| <b>7</b>  | 104.0528 | 713.3076  | 696.2810        |           | 741.3025        | 724.2759        |           | <b>M</b> | <b>1115.5302</b> | <b>1098.5037</b> | 1097.5197       | <b>10</b> |
| <b>8</b>  | 102.0550 | 842.3502  | 825.3236        | 824.3396  | 870.3451        | 853.3185        | 852.3345  | <b>E</b> | <b>984.4897</b>  | <b>967.4632</b>  | <b>966.4792</b> | <b>9</b>  |
| <b>9</b>  | 70.0651  | 939.4029  | 922.3764        | 921.3924  | <b>967.3978</b> | 950.3713        | 949.3873  | <b>P</b> | <b>855.4472</b>  | <b>838.4206</b>  | 837.4366        | <b>8</b>  |
| <b>10</b> | 86.0964  | 1052.4870 | 1035.4604       | 1034.4764 | 1080.4819       | 1063.4553       | 1062.4713 | <b>L</b> | <b>758.3944</b>  | 741.3678         | 740.3838        | <b>7</b>  |
| <b>11</b> | 60.0444  | 1139.5190 | 1122.4925       | 1121.5084 | 1167.5139       | 1150.4874       | 1149.5034 | <b>S</b> | <b>645.3103</b>  | 628.2838         | 627.2998        | <b>6</b>  |
| <b>12</b> | 44.0495  | 1210.5561 | 1193.5296       | 1192.5456 | 1238.5510       | 1221.5245       | 1220.5405 | <b>A</b> | <b>558.2783</b>  | 541.2517         |                 | <b>5</b>  |
| <b>13</b> | 30.0338  | 1267.5776 | 1250.5510       | 1249.5670 | 1295.5725       | 1278.5460       | 1277.5619 | <b>G</b> | <b>487.2412</b>  | 470.2146         |                 | <b>4</b>  |
| <b>14</b> | 120.0808 | 1414.6460 | 1397.6195       | 1396.6354 | 1442.6409       | 1425.6144       | 1424.6303 | <b>F</b> | 430.2197         | 413.1932         |                 | <b>3</b>  |
| <b>15</b> | 110.0713 | 1551.7049 | 1534.6784       | 1533.6943 | 1579.6998       | 1562.6733       | 1561.6893 | <b>H</b> | <b>283.1513</b>  | 266.1248         |                 | <b>2</b>  |
| <b>16</b> | 101.0709 |           |                 |           |                 |                 |           | <b>Q</b> | 146.0924         | 129.0658         |                 | <b>1</b>  |

| Seq            | ya              | yb              | Seq           | ya       | yb              | Seq           | ya       | yb              |
|----------------|-----------------|-----------------|---------------|----------|-----------------|---------------|----------|-----------------|
| <b>FY</b>      | <b>283.1441</b> | 311.1390        | <b>FYN</b>    | 397.1870 | 425.1819        | <b>FYNG</b>   | 454.2085 | 482.2034        |
| <b>FYNGA</b>   | 525.2456        | 553.2405        | <b>FYNGAM</b> | 656.2861 | 684.2810        | <b>YN</b>     | 250.1186 | 278.1135        |
| <b>YNG</b>     | 307.1401        | <b>335.1350</b> | <b>YNGA</b>   | 378.1772 | 406.1721        | <b>YNGAM</b>  | 509.2177 | 537.2126        |
| <b>YNGAME</b>  | 638.2603        | 666.2552        | <b>NG</b>     | 144.0768 | 172.0717        | <b>NGA</b>    | 215.1139 | <b>243.1088</b> |
| <b>NGAM</b>    | 346.1544        | 374.1493        | <b>NGAME</b>  | 475.1969 | 503.1919        | <b>NGAMEP</b> | 572.2497 | 600.2446        |
| <b>NGAMEPL</b> | 685.3338        | 713.3287        | <b>GA</b>     | 101.0709 | 129.0659        | <b>GAM</b>    | 232.1114 | 260.1063        |
| <b>GAME</b>    | <b>361.1540</b> | 389.1489        | <b>GAMEP</b>  | 458.2068 | 486.2017        | <b>GAMEPL</b> | 571.2908 | 599.2858        |
| <b>GAMEPLS</b> | 658.3229        | 686.3178        | <b>AM</b>     | 175.0900 | 203.0849        | <b>AME</b>    | 304.1326 | 332.1275        |
| <b>AMEP</b>    | 401.1853        | 429.1802        | <b>AMEPL</b>  | 514.2694 | 542.2643        | <b>AMEPLS</b> | 601.3014 | 629.2963        |
| <b>AMEPLSA</b> | 672.3385        | 700.3334        | <b>ME</b>     | 233.0954 | 261.0904        | <b>MEP</b>    | 330.1482 | 358.1431        |
| <b>MEPL</b>    | 443.2323        | 471.2272        | <b>MEPLS</b>  | 530.2643 | <b>558.2592</b> | <b>MEPLSA</b> | 601.3014 | 629.2963        |



|                |          |          |              |                 |          |               |                 |          |
|----------------|----------|----------|--------------|-----------------|----------|---------------|-----------------|----------|
| <b>MEPLSAG</b> | 658.3229 | 686.3178 | <b>EP</b>    | 199.1077        | 227.1026 | <b>EPL</b>    | 312.1918        | 340.1867 |
| <b>EPLS</b>    | 399.2238 | 427.2187 | <b>EPLSA</b> | 470.2609        | 498.2558 | <b>EPLSAG</b> | 527.2824        | 555.2773 |
| <b>EPLSAGF</b> | 674.3508 | 702.3457 | <b>PL</b>    | 183.1492        | 211.1441 | <b>PLS</b>    | 270.1812        | 298.1761 |
| <b>PLSA</b>    | 341.2183 | 369.2132 | <b>PLSAG</b> | 398.2398        | 426.2347 | <b>PLSAGF</b> | 545.3082        | 573.3031 |
| <b>PLSAGFH</b> | 682.3671 | 710.3620 | <b>LS</b>    | 173.1285        | 201.1234 | <b>LSA</b>    | 244.1656        | 272.1605 |
| <b>LSAG</b>    | 301.1870 | 329.1819 | <b>LSAGF</b> | 448.2554        | 476.2504 | <b>LSAGFH</b> | 585.3144        | 613.3093 |
| <b>SA</b>      | 131.0815 | 159.0764 | <b>SAG</b>   | 188.1030        | 216.0979 | <b>SAGF</b>   | <b>335.1714</b> | 363.1663 |
| <b>SAGFH</b>   | 472.2303 | 500.2252 | <b>AG</b>    | 101.0709        | 129.0659 | <b>AGF</b>    | 248.1394        | 276.1343 |
| <b>AGFH</b>    | 385.1983 | 413.1932 | <b>GF</b>    | <b>177.1022</b> | 205.0972 | <b>GFH</b>    | 314.1612        | 342.1561 |
| <b>FH</b>      | 257.1397 | 285.1346 |              |                 |          |               |                 |          |

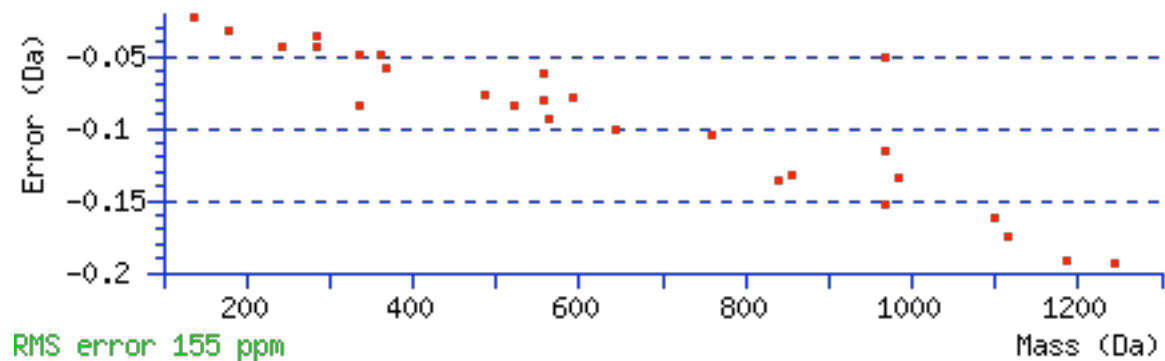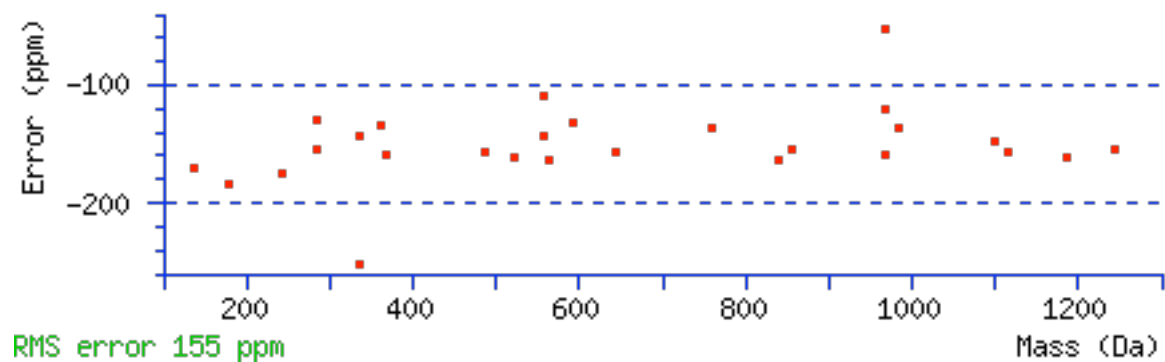

MS/MS Fragmentation of **GFNSGAMEPLGSGFI**

Found in **XP\_785647**, PREDICTED: similar to pedal peptide precursor protein [Strongylocentrotus purpuratus].

Match to Query 607: 1482.594188 from(742.304370,2+) intensity(403812.0000)

Title: Cmpd 272, +MSn(742.3936), 38.8 min

Data file Qtof\_all.mgf

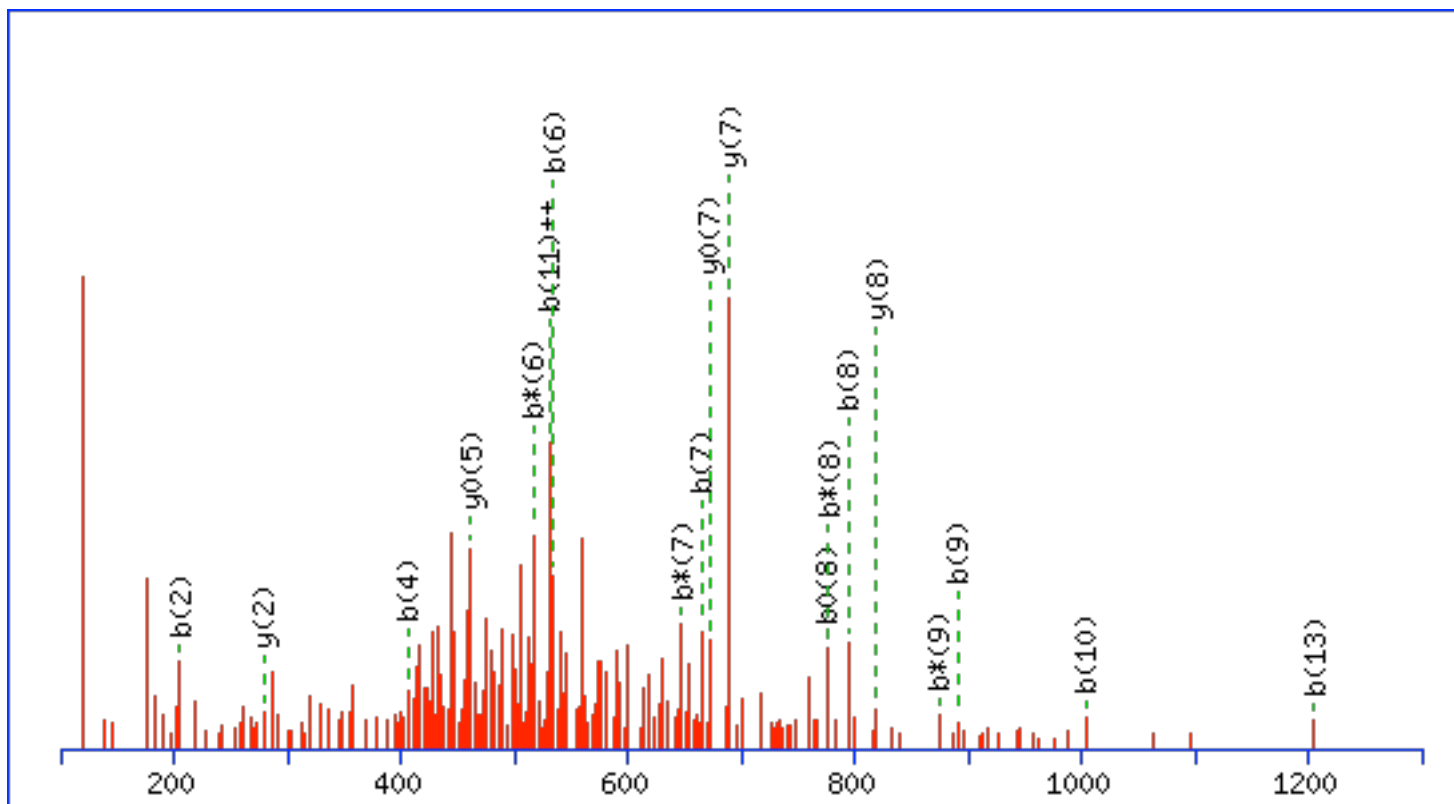

**Monoisotopic mass of neutral peptide Mr(calc): 1482.6813 Ions Score: 36 Expect: 0.97 Matches (Bold Red): 19/128**  
 fragment ions using 49 most intense peaks

| # | b               | b <sup>++</sup> | b <sup>*</sup> | b <sup>*++</sup> | b <sup>0</sup> | b <sup>0++</sup> | Seq. | y         | y <sup>++</sup> | y <sup>*</sup> | y <sup>*++</sup> | y <sup>0</sup> | y <sup>0++</sup> | #  |
|---|-----------------|-----------------|----------------|------------------|----------------|------------------|------|-----------|-----------------|----------------|------------------|----------------|------------------|----|
| 1 | 58.0287         | 29.5180         |                |                  |                |                  | G    |           |                 |                |                  |                |                  | 15 |
| 2 | <b>205.0972</b> | 103.0522        |                |                  |                |                  | F    | 1426.6671 | 713.8372        | 1409.6406      | 705.3239         | 1408.6566      | 704.8319         | 14 |
| 3 | 319.1401        | 160.0737        | 302.1135       | 151.5604         |                |                  | N    | 1279.5987 | 640.3030        | 1262.5722      | 631.7897         | 1261.5881      | 631.2977         | 13 |
| 4 | <b>406.1721</b> | 203.5897        | 389.1456       | 195.0764         | 388.1615       | 194.5844         | S    | 1165.5558 | 583.2815        |                |                  | 1147.5452      | 574.2762         | 12 |

|           |                  |                 |                 |          |                 |          |          |                 |          |  |  |                 |          |           |
|-----------|------------------|-----------------|-----------------|----------|-----------------|----------|----------|-----------------|----------|--|--|-----------------|----------|-----------|
| <b>5</b>  | 463.1936         | 232.1004        | 446.1670        | 223.5872 | 445.1830        | 223.0951 | <b>G</b> | 1078.5238       | 539.7655 |  |  | 1060.5132       | 530.7602 | <b>11</b> |
| <b>6</b>  | <b>534.2307</b>  | 267.6190        | <b>517.2041</b> | 259.1057 | 516.2201        | 258.6137 | <b>A</b> | 1021.5023       | 511.2548 |  |  | 1003.4917       | 502.2495 | <b>10</b> |
| <b>7</b>  | <b>665.2712</b>  | 333.1392        | <b>648.2446</b> | 324.6259 | 647.2606        | 324.1339 | <b>M</b> | 950.4652        | 475.7362 |  |  | 932.4546        | 466.7309 | <b>9</b>  |
| <b>8</b>  | <b>794.3138</b>  | 397.6605        | <b>777.2872</b> | 389.1472 | <b>776.3032</b> | 388.6552 | <b>E</b> | <b>819.4247</b> | 410.2160 |  |  | 801.4141        | 401.2107 | <b>8</b>  |
| <b>9</b>  | <b>891.3665</b>  | 446.1869        | <b>874.3400</b> | 437.6736 | 873.3560        | 437.1816 | <b>P</b> | <b>690.3821</b> | 345.6947 |  |  | <b>672.3715</b> | 336.6894 | <b>7</b>  |
| <b>10</b> | <b>1004.4506</b> | 502.7289        | 987.4240        | 494.2157 | 986.4400        | 493.7237 | <b>L</b> | 593.3293        | 297.1683 |  |  | 575.3188        | 288.1630 | <b>6</b>  |
| <b>11</b> | 1061.4721        | <b>531.2397</b> | 1044.4455       | 522.7264 | 1043.4615       | 522.2344 | <b>G</b> | 480.2453        | 240.6263 |  |  | <b>462.2347</b> | 231.6210 | <b>5</b>  |
| <b>12</b> | 1148.5041        | 574.7557        | 1131.4775       | 566.2424 | 1130.4935       | 565.7504 | <b>S</b> | 423.2238        | 212.1155 |  |  | 405.2132        | 203.1103 | <b>4</b>  |
| <b>13</b> | <b>1205.5255</b> | 603.2664        | 1188.4990       | 594.7531 | 1187.5150       | 594.2611 | <b>G</b> | 336.1918        | 168.5995 |  |  |                 |          | <b>3</b>  |
| <b>14</b> | 1352.5940        | 676.8006        | 1335.5674       | 668.2873 | 1334.5834       | 667.7953 | <b>F</b> | <b>279.1703</b> | 140.0888 |  |  |                 |          | <b>2</b>  |
| <b>15</b> |                  |                 |                 |          |                 |          | <b>I</b> | 132.1019        | 66.5546  |  |  |                 |          | <b>1</b>  |

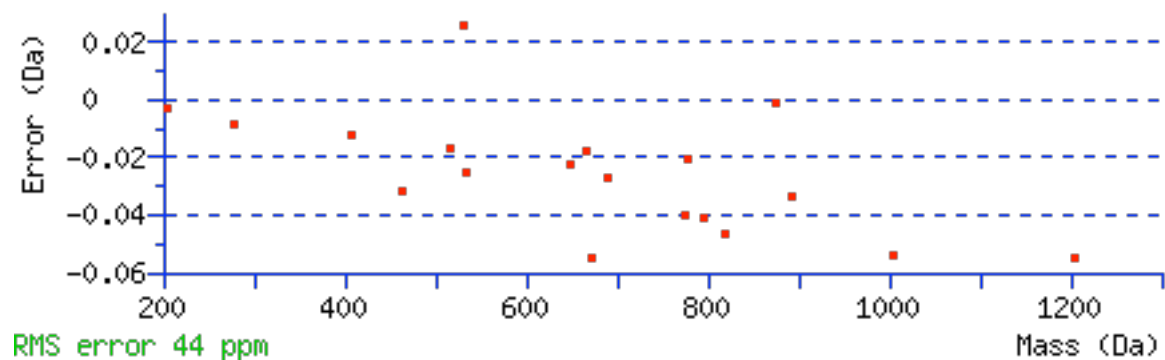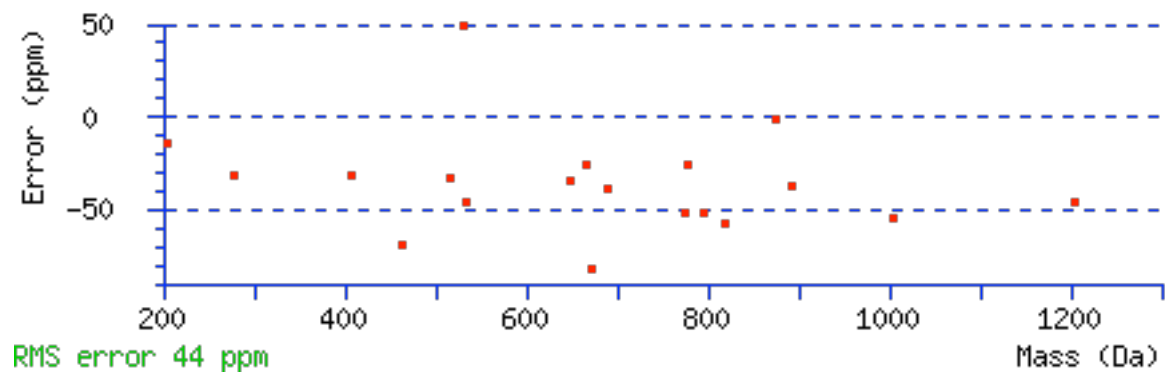

MS/MS Fragmentation of **GFYNGAMEPLSAGFHQ**

Found in **XP\_785647**, PREDICTED: similar to pedal peptide precursor protein [Strongylocentrotus purpuratus].

Match to Query 317: 1723.435048 from(862.724800,2+) intensity(5856.6147)

Data file Maldi\_All.mgf



**Monoisotopic mass of neutral peptide Mr(calc): 1723.7777 Variable modifications: C-term : Amidated (C-term) Ions Score: 69 Expect: 0.0031 Matches (Bold Red): 28/244 fragment ions using 37 most intense peaks**

| # | Immon.          | a               | a*       | a <sup>0</sup> | b               | b*       | b <sup>0</sup> | Seq. | y         | y*        | y <sup>0</sup> | #  |
|---|-----------------|-----------------|----------|----------------|-----------------|----------|----------------|------|-----------|-----------|----------------|----|
| 1 | 30.0338         | 30.0338         |          |                | 58.0287         |          |                | G    |           |           |                | 16 |
| 2 | 120.0808        | <b>177.1022</b> |          |                | 205.0972        |          |                | F    | 1667.7635 | 1650.7369 | 1649.7529      | 15 |
| 3 | <b>136.0757</b> | 340.1656        |          |                | <b>368.1605</b> |          |                | Y    | 1520.6951 | 1503.6685 | 1502.6845      | 14 |
| 4 | 87.0553         | 454.2085        | 437.1819 |                | 482.2034        | 465.1769 |                | N    | 1357.6317 | 1340.6052 | 1339.6212      | 13 |

|           |          |           |                 |           |                 |                 |           |          |                  |                  |                 |           |
|-----------|----------|-----------|-----------------|-----------|-----------------|-----------------|-----------|----------|------------------|------------------|-----------------|-----------|
| <b>5</b>  | 30.0338  | 511.2300  | 494.2034        |           | 539.2249        | <b>522.1983</b> |           | <b>G</b> | <b>1243.5888</b> | 1226.5623        | 1225.5782       | <b>12</b> |
| <b>6</b>  | 44.0495  | 582.2671  | <b>565.2405</b> |           | 610.2620        | <b>593.2354</b> |           | <b>A</b> | <b>1186.5673</b> | 1169.5408        | 1168.5568       | <b>11</b> |
| <b>7</b>  | 104.0528 | 713.3076  | 696.2810        |           | 741.3025        | 724.2759        |           | <b>M</b> | <b>1115.5302</b> | <b>1098.5037</b> | 1097.5197       | <b>10</b> |
| <b>8</b>  | 102.0550 | 842.3502  | 825.3236        | 824.3396  | 870.3451        | 853.3185        | 852.3345  | <b>E</b> | <b>984.4897</b>  | <b>967.4632</b>  | <b>966.4792</b> | <b>9</b>  |
| <b>9</b>  | 70.0651  | 939.4029  | 922.3764        | 921.3924  | <b>967.3978</b> | 950.3713        | 949.3873  | <b>P</b> | <b>855.4472</b>  | <b>838.4206</b>  | 837.4366        | <b>8</b>  |
| <b>10</b> | 86.0964  | 1052.4870 | 1035.4604       | 1034.4764 | 1080.4819       | 1063.4553       | 1062.4713 | <b>L</b> | <b>758.3944</b>  | 741.3678         | 740.3838        | <b>7</b>  |
| <b>11</b> | 60.0444  | 1139.5190 | 1122.4925       | 1121.5084 | 1167.5139       | 1150.4874       | 1149.5034 | <b>S</b> | <b>645.3103</b>  | 628.2838         | 627.2998        | <b>6</b>  |
| <b>12</b> | 44.0495  | 1210.5561 | 1193.5296       | 1192.5456 | 1238.5510       | 1221.5245       | 1220.5405 | <b>A</b> | <b>558.2783</b>  | 541.2517         |                 | <b>5</b>  |
| <b>13</b> | 30.0338  | 1267.5776 | 1250.5510       | 1249.5670 | 1295.5725       | 1278.5460       | 1277.5619 | <b>G</b> | <b>487.2412</b>  | 470.2146         |                 | <b>4</b>  |
| <b>14</b> | 120.0808 | 1414.6460 | 1397.6195       | 1396.6354 | 1442.6409       | 1425.6144       | 1424.6303 | <b>F</b> | 430.2197         | 413.1932         |                 | <b>3</b>  |
| <b>15</b> | 110.0713 | 1551.7049 | 1534.6784       | 1533.6943 | 1579.6998       | 1562.6733       | 1561.6893 | <b>H</b> | <b>283.1513</b>  | 266.1248         |                 | <b>2</b>  |
| <b>16</b> | 101.0709 |           |                 |           |                 |                 |           | <b>Q</b> | 146.0924         | 129.0658         |                 | <b>1</b>  |

| Seq            | ya              | yb              | Seq           | ya       | yb              | Seq           | ya       | yb              |
|----------------|-----------------|-----------------|---------------|----------|-----------------|---------------|----------|-----------------|
| <b>FY</b>      | <b>283.1441</b> | 311.1390        | <b>FYN</b>    | 397.1870 | 425.1819        | <b>FYNG</b>   | 454.2085 | 482.2034        |
| <b>FYNGA</b>   | 525.2456        | 553.2405        | <b>FYNGAM</b> | 656.2861 | 684.2810        | <b>YN</b>     | 250.1186 | 278.1135        |
| <b>YNG</b>     | 307.1401        | <b>335.1350</b> | <b>YNGA</b>   | 378.1772 | 406.1721        | <b>YNGAM</b>  | 509.2177 | 537.2126        |
| <b>YNGAME</b>  | 638.2603        | 666.2552        | <b>NG</b>     | 144.0768 | 172.0717        | <b>NGA</b>    | 215.1139 | <b>243.1088</b> |
| <b>NGAM</b>    | 346.1544        | 374.1493        | <b>NGAME</b>  | 475.1969 | 503.1919        | <b>NGAMEP</b> | 572.2497 | 600.2446        |
| <b>NGAMEPL</b> | 685.3338        | 713.3287        | <b>GA</b>     | 101.0709 | 129.0659        | <b>GAM</b>    | 232.1114 | 260.1063        |
| <b>GAME</b>    | <b>361.1540</b> | 389.1489        | <b>GAMEP</b>  | 458.2068 | 486.2017        | <b>GAMEPL</b> | 571.2908 | 599.2858        |
| <b>GAMEPLS</b> | 658.3229        | 686.3178        | <b>AM</b>     | 175.0900 | 203.0849        | <b>AME</b>    | 304.1326 | 332.1275        |
| <b>AMEP</b>    | 401.1853        | 429.1802        | <b>AMEPL</b>  | 514.2694 | 542.2643        | <b>AMEPLS</b> | 601.3014 | 629.2963        |
| <b>AMEPLSA</b> | 672.3385        | 700.3334        | <b>ME</b>     | 233.0954 | 261.0904        | <b>MEP</b>    | 330.1482 | 358.1431        |
| <b>MEPL</b>    | 443.2323        | 471.2272        | <b>MEPLS</b>  | 530.2643 | <b>558.2592</b> | <b>MEPLSA</b> | 601.3014 | 629.2963        |

|                |          |          |              |                 |          |               |                 |          |
|----------------|----------|----------|--------------|-----------------|----------|---------------|-----------------|----------|
| <b>MEPLSAG</b> | 658.3229 | 686.3178 | <b>EP</b>    | 199.1077        | 227.1026 | <b>EPL</b>    | 312.1918        | 340.1867 |
| <b>EPLS</b>    | 399.2238 | 427.2187 | <b>EPLSA</b> | 470.2609        | 498.2558 | <b>EPLSAG</b> | 527.2824        | 555.2773 |
| <b>EPLSAGF</b> | 674.3508 | 702.3457 | <b>PL</b>    | 183.1492        | 211.1441 | <b>PLS</b>    | 270.1812        | 298.1761 |
| <b>PLSA</b>    | 341.2183 | 369.2132 | <b>PLSAG</b> | 398.2398        | 426.2347 | <b>PLSAGF</b> | 545.3082        | 573.3031 |
| <b>PLSAGFH</b> | 682.3671 | 710.3620 | <b>LS</b>    | 173.1285        | 201.1234 | <b>LSA</b>    | 244.1656        | 272.1605 |
| <b>LSAG</b>    | 301.1870 | 329.1819 | <b>LSAGF</b> | 448.2554        | 476.2504 | <b>LSAGFH</b> | 585.3144        | 613.3093 |
| <b>SA</b>      | 131.0815 | 159.0764 | <b>SAG</b>   | 188.1030        | 216.0979 | <b>SAGF</b>   | <b>335.1714</b> | 363.1663 |
| <b>SAGFH</b>   | 472.2303 | 500.2252 | <b>AG</b>    | 101.0709        | 129.0659 | <b>AGF</b>    | 248.1394        | 276.1343 |
| <b>AGFH</b>    | 385.1983 | 413.1932 | <b>GF</b>    | <b>177.1022</b> | 205.0972 | <b>GFH</b>    | 314.1612        | 342.1561 |
| <b>FH</b>      | 257.1397 | 285.1346 |              |                 |          |               |                 |          |





MS/MS Fragmentation of **LQFETTQDRVPA**

Found in **XP\_001175944**, PREDICTED: hypothetical protein [Strongylocentrotus purpuratus].

Match to Query 160: 1403.477448 from(702.746000,2+) intensity(1298.1272)

Data file Maldi\_All.mgf

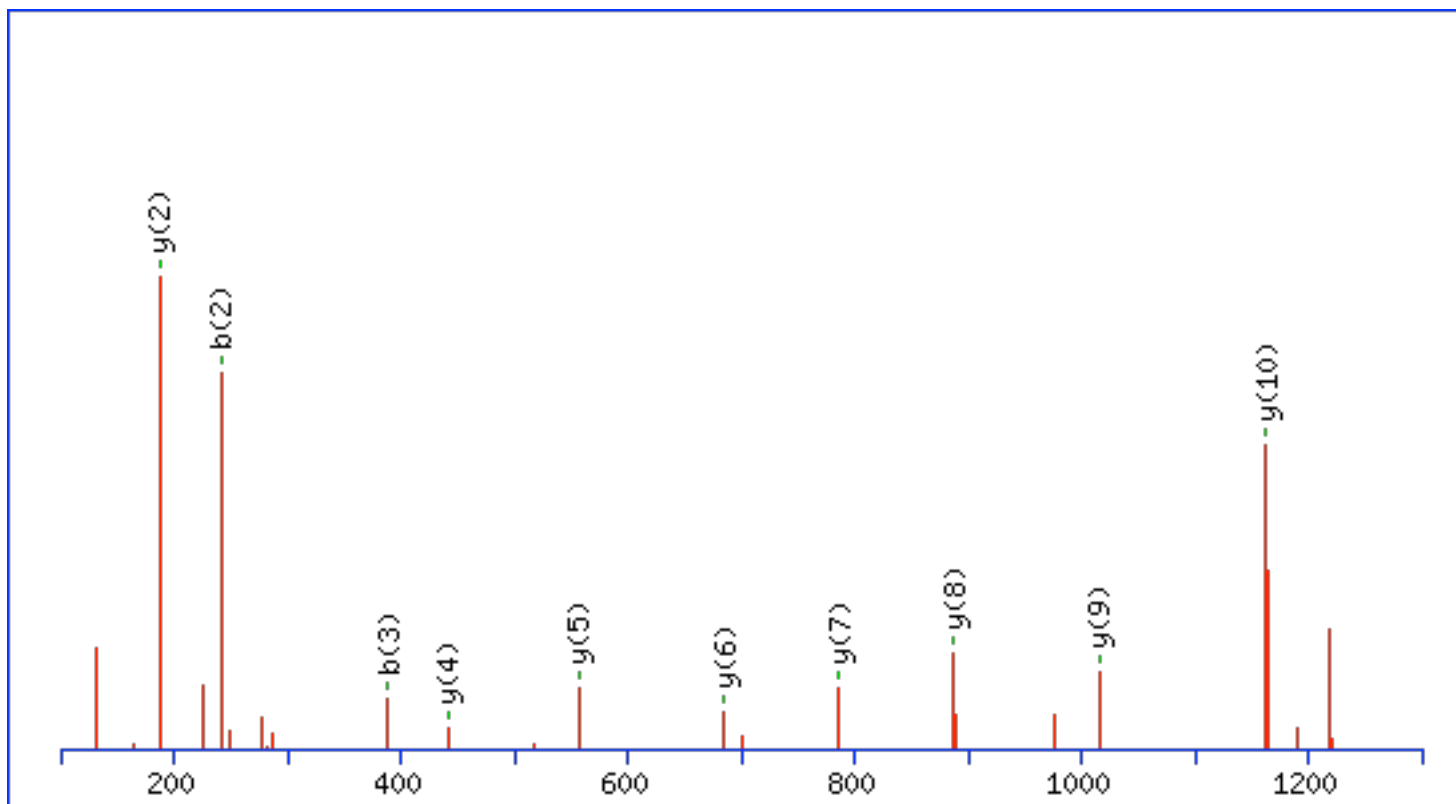

**Monoisotopic mass of neutral peptide Mr(calc):** 1403.7045 **Ions Score:** 87 **Expect:** 3.6e-05 **Matches (Bold Red):** 10/180 fragment ions using 10 most intense peaks

| # | Immon.       | a        | a*       | a <sup>0</sup> | b               | b*       | b <sup>0</sup> | d | Seq | v             | w             | w' | y             | y*            | y <sup>0</sup> | #      |
|---|--------------|----------|----------|----------------|-----------------|----------|----------------|---|-----|---------------|---------------|----|---------------|---------------|----------------|--------|
| 1 | 86.0964      | 86.0964  |          |                | 114.0913        |          |                |   | L   |               |               |    |               |               |                | 1<br>2 |
| 2 | 101.070<br>9 | 214.1550 | 197.1285 |                | <b>242.1499</b> | 225.1234 |                |   | Q   | 1218.574<br>9 | 1217.579<br>7 |    | 1291.627<br>7 | 1274.601<br>2 | 1273.617<br>1  | 1<br>1 |

|           |              |               |               |               |                 |               |               |               |          |               |          |              |                       |               |               |                |
|-----------|--------------|---------------|---------------|---------------|-----------------|---------------|---------------|---------------|----------|---------------|----------|--------------|-----------------------|---------------|---------------|----------------|
| <b>3</b>  | 120.080<br>8 | 361.2234      | 344.1969      |               | <b>389.2183</b> | 372.1918      |               |               | <b>F</b> | 1071.506<br>5 |          |              | <b>1163.569<br/>1</b> | 1146.542<br>6 | 1145.558<br>6 | <b>1<br/>0</b> |
| <b>4</b>  | 102.055<br>0 | 490.2660      | 473.2395      | 472.2554      | 518.2609        | 501.2344      | 500.2504      |               | <b>E</b> | 942.4639      | 941.4687 |              | <b>1016.500<br/>7</b> | 999.4742      | 998.4902      | <b>9</b>       |
| <b>5</b>  | 74.0600      | 591.3137      | 574.2871      | 573.3031      | 619.3086        | 602.2821      | 601.2980      |               | <b>T</b> | 841.4163      | 854.4367 | 856.415<br>9 | <b>887.4581</b>       | 870.4316      | 869.4476      | <b>8</b>       |
| <b>6</b>  | 74.0600      | 692.3614      | 675.3348      | 674.3508      | 720.3563        | 703.3297      | 702.3457      |               | <b>T</b> | 740.3686      | 753.3890 | 755.368<br>2 | <b>786.4104</b>       | 769.3839      | 768.3999      | <b>7</b>       |
| <b>7</b>  | 101.070<br>9 | 820.4199      | 803.3934      | 802.4094      | 848.4149        | 831.3883      | 830.4043      |               | <b>Q</b> | 612.3100      | 611.3148 |              | <b>685.3628</b>       | 668.3362      | 667.3522      | <b>6</b>       |
| <b>8</b>  | 88.0393      | 935.4469      | 918.4203      | 917.4363      | 963.4418        | 946.4153      | 945.4312      |               | <b>D</b> | 497.2831      | 496.2878 |              | <b>557.3042</b>       | 540.2776      | 539.2936      | <b>5</b>       |
| <b>9</b>  | 129.113<br>5 | 1091.548<br>0 | 1074.521<br>5 | 1073.537<br>4 | 1119.542<br>9   | 1102.516<br>4 | 1101.532<br>3 | 1006.484<br>0 | <b>R</b> | 341.1819      | 340.1867 |              | <b>442.2772</b>       | 425.2507      |               | <b>4</b>       |
| <b>10</b> | 72.0808      | 1190.616<br>4 | 1173.589<br>9 | 1172.605<br>8 | 1218.611<br>3   | 1201.584<br>8 | 1200.600<br>8 | 1176.600<br>8 | <b>V</b> |               |          |              | 286.1761              |               |               | <b>3</b>       |
| <b>11</b> | 70.0651      | 1287.669<br>2 | 1270.642<br>6 | 1269.658<br>6 | 1315.664<br>1   | 1298.637<br>5 | 1297.653<br>5 | 1261.653<br>5 | <b>P</b> |               |          |              | <b>187.1077</b>       |               |               | <b>2</b>       |
| <b>12</b> | 44.0495      |               |               |               |                 |               |               |               | <b>A</b> |               |          |              | 90.0550               |               |               | <b>1</b>       |

| Seq          | ya       | yb       | Seq          | ya       | yb       | Seq           | ya       | yb       |
|--------------|----------|----------|--------------|----------|----------|---------------|----------|----------|
| <b>QF</b>    | 248.1394 | 276.1343 | <b>QFE</b>   | 377.1819 | 405.1769 | <b>QFET</b>   | 478.2296 | 506.2245 |
| <b>QFETT</b> | 579.2773 | 607.2722 | <b>FE</b>    | 249.1234 | 277.1183 | <b>FET</b>    | 350.1710 | 378.1660 |
| <b>FETT</b>  | 451.2187 | 479.2136 | <b>FETTQ</b> | 579.2773 | 607.2722 | <b>FETTQD</b> | 694.3042 | 722.2992 |
| <b>ET</b>    | 203.1026 | 231.0975 | <b>ETT</b>   | 304.1503 | 332.1452 | <b>ETTQ</b>   | 432.2089 | 460.2038 |
| <b>ETTQD</b> | 547.2358 | 575.2307 | <b>TT</b>    | 175.1077 | 203.1026 | <b>TTQ</b>    | 303.1663 | 331.1612 |
| <b>TTQD</b>  | 418.1932 | 446.1882 | <b>TTQDR</b> | 574.2944 | 602.2893 | <b>TTQDRV</b> | 673.3628 | 701.3577 |
| <b>TQ</b>    | 202.1186 | 230.1135 | <b>TQD</b>   | 317.1456 | 345.1405 | <b>TQDR</b>   | 473.2467 | 501.2416 |

|              |          |          |              |          |          |             |          |          |
|--------------|----------|----------|--------------|----------|----------|-------------|----------|----------|
| <b>TQDRV</b> | 572.3151 | 600.3100 | <b>TQDRV</b> | 669.3679 | 697.3628 | <b>QD</b>   | 216.0979 | 244.0928 |
| <b>QDR</b>   | 372.1990 | 400.1939 | <b>QDRV</b>  | 471.2674 | 499.2623 | <b>QDRV</b> | 568.3202 | 596.3151 |
| <b>DR</b>    | 244.1404 | 272.1353 | <b>DRV</b>   | 343.2088 | 371.2037 | <b>DRV</b>  | 440.2616 | 468.2565 |
| <b>RV</b>    | 228.1819 | 256.1768 | <b>RVP</b>   | 325.2347 | 353.2296 | <b>VP</b>   | 169.1335 | 197.1285 |

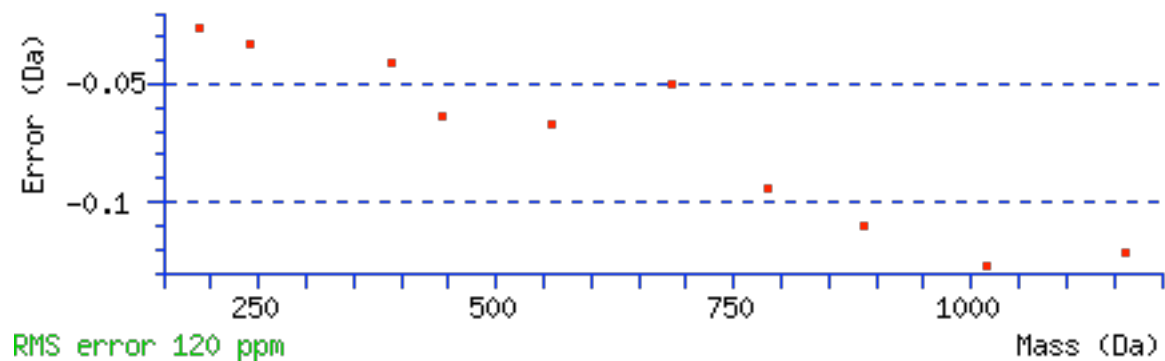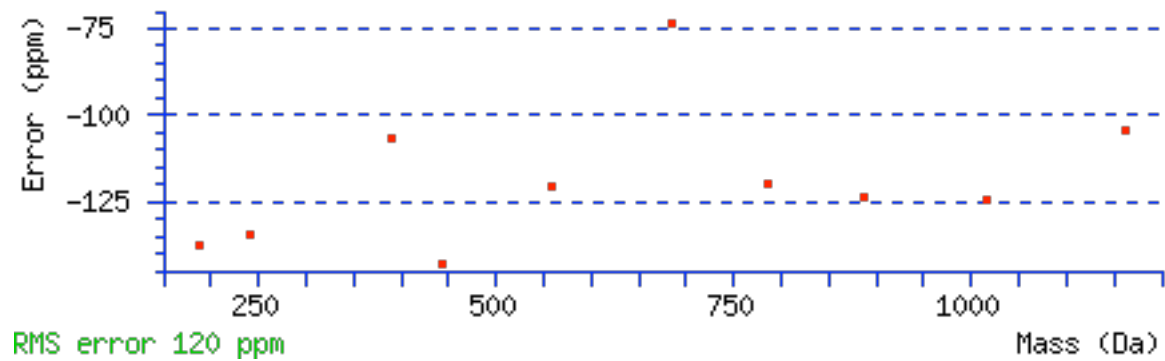

MS/MS Fragmentation of **SLQFETTQDRVPA**  
 Found in **XP\_001175944**, PREDICTED: hypothetical protein [Strongylocentrotus purpuratus].



|           |                |                 |               |               |                             |               |               |               |          |               |               |              |                             |               |               |                      |
|-----------|----------------|-----------------|---------------|---------------|-----------------------------|---------------|---------------|---------------|----------|---------------|---------------|--------------|-----------------------------|---------------|---------------|----------------------|
| <b>2</b>  | 86.0964        | <b>173.1285</b> |               | 155.1179      | <b>201.1234</b>             |               | 183.1128      |               | <b>L</b> | 1346.633<br>5 | 1345.638<br>3 |              | 1404.711<br>8               | 1387.685<br>2 | 1386.701<br>2 | <b>1</b><br><b>2</b> |
| <b>3</b>  | 101.070<br>9   | 301.1870        | 284.1605      | 283.1765      | <b>329.1819</b>             | 312.1554      | 311.1714      |               | <b>Q</b> | 1218.574<br>9 | 1217.579<br>7 |              | 1291.627<br>7               | 1274.601<br>2 | 1273.617<br>1 | <b>1</b><br><b>1</b> |
| <b>4</b>  | 120.080<br>8   | 448.2554        | 431.2289      | 430.2449      | 476.2504                    | 459.2238      | 458.2398      |               | <b>F</b> | 1071.506<br>5 |               |              | <b>1163.569</b><br><b>1</b> | 1146.542<br>6 | 1145.558<br>6 | <b>1</b><br><b>0</b> |
| <b>5</b>  | 102.055<br>0   | 577.2980        | 560.2715      | 559.2875      | 605.2930                    | 588.2664      | 587.2824      |               | <b>E</b> | 942.4639      | 941.4687      |              | <b>1016.500</b><br><b>7</b> | 999.4742      | 998.4902      | <b>9</b>             |
| <b>6</b>  | 74.0600        | 678.3457        | 661.3192      | 660.3352      | 706.3406                    | 689.3141      | 688.3301      |               | <b>T</b> | 841.4163      | 854.4367      | 856.415<br>9 | <b>887.4581</b>             | 870.4316      | 869.4476      | <b>8</b>             |
| <b>7</b>  | 74.0600        | 779.3934        | 762.3668      | 761.3828      | 807.3883                    | 790.3618      | 789.3777      |               | <b>T</b> | 740.3686      | 753.3890      | 755.368<br>2 | <b>786.4104</b>             | 769.3839      | 768.3999      | <b>7</b>             |
| <b>8</b>  | 101.070<br>9   | 907.4520        | 890.4254      | 889.4414      | 935.4469                    | 918.4203      | 917.4363      |               | <b>Q</b> | 612.3100      | 611.3148      |              | <b>685.3628</b>             | 668.3362      | 667.3522      | <b>6</b>             |
| <b>9</b>  | 88.0393        | 1022.478<br>9   | 1005.452<br>4 | 1004.468<br>4 | 1050.473<br>8               | 1033.447<br>3 | 1032.463<br>3 |               | <b>D</b> | 497.2831      | 496.2878      |              | <b>557.3042</b>             | 540.2776      | 539.2936      | <b>5</b>             |
| <b>10</b> | 129.113<br>5   | 1178.580<br>0   | 1161.553<br>5 | 1160.569<br>5 | <b>1206.574</b><br><b>9</b> | 1189.548<br>4 | 1188.564<br>4 | 1093.516<br>0 | <b>R</b> | 341.1819      | 340.1867      |              | <b>442.2772</b>             | 425.2507      |               | <b>4</b>             |
| <b>11</b> | <b>72.0808</b> | 1277.648<br>4   | 1260.621<br>9 | 1259.637<br>9 | <b>1305.643</b><br><b>4</b> | 1288.616<br>8 | 1287.632<br>8 | 1263.632<br>8 | <b>V</b> |               |               |              | 286.1761                    |               |               | <b>3</b>             |
| <b>12</b> | 70.0651        | 1374.701<br>2   | 1357.674<br>7 | 1356.690<br>6 | 1402.696<br>1               | 1385.669<br>6 | 1384.685<br>6 | 1348.685<br>6 | <b>P</b> |               |               |              | <b>187.1077</b>             |               |               | <b>2</b>             |
| <b>13</b> | 44.0495        |                 |               |               |                             |               |               |               | <b>A</b> |               |               |              | 90.0550                     |               |               | <b>1</b>             |

| Seq          | ya       | yb       | Seq           | ya       | yb       | Seq          | ya       | yb       |
|--------------|----------|----------|---------------|----------|----------|--------------|----------|----------|
| <b>LQ</b>    | 214.1550 | 242.1499 | <b>LQF</b>    | 361.2234 | 389.2183 | <b>LQFE</b>  | 490.2660 | 518.2609 |
| <b>LQFET</b> | 591.3137 | 619.3086 | <b>LQFETT</b> | 692.3614 | 720.3563 | <b>QF</b>    | 248.1394 | 276.1343 |
| <b>QFE</b>   | 377.1819 | 405.1769 | <b>QFET</b>   | 478.2296 | 506.2245 | <b>QFETT</b> | 579.2773 | 607.2722 |

|               |          |          |               |          |          |              |          |          |
|---------------|----------|----------|---------------|----------|----------|--------------|----------|----------|
| <b>FE</b>     | 249.1234 | 277.1183 | <b>FET</b>    | 350.1710 | 378.1660 | <b>FETT</b>  | 451.2187 | 479.2136 |
| <b>FETTQ</b>  | 579.2773 | 607.2722 | <b>FETTQD</b> | 694.3042 | 722.2992 | <b>ET</b>    | 203.1026 | 231.0975 |
| <b>ETT</b>    | 304.1503 | 332.1452 | <b>ETTQ</b>   | 432.2089 | 460.2038 | <b>ETTQD</b> | 547.2358 | 575.2307 |
| <b>TT</b>     | 175.1077 | 203.1026 | <b>TTQ</b>    | 303.1663 | 331.1612 | <b>TTQD</b>  | 418.1932 | 446.1882 |
| <b>TTQDR</b>  | 574.2944 | 602.2893 | <b>TTQDRV</b> | 673.3628 | 701.3577 | <b>TQ</b>    | 202.1186 | 230.1135 |
| <b>TQD</b>    | 317.1456 | 345.1405 | <b>TQDR</b>   | 473.2467 | 501.2416 | <b>TQDRV</b> | 572.3151 | 600.3100 |
| <b>TQDRVP</b> | 669.3679 | 697.3628 | <b>QD</b>     | 216.0979 | 244.0928 | <b>QDR</b>   | 372.1990 | 400.1939 |
| <b>QDRV</b>   | 471.2674 | 499.2623 | <b>QDRVP</b>  | 568.3202 | 596.3151 | <b>DR</b>    | 244.1404 | 272.1353 |
| <b>DRV</b>    | 343.2088 | 371.2037 | <b>DRVP</b>   | 440.2616 | 468.2565 | <b>RV</b>    | 228.1819 | 256.1768 |
| <b>RVP</b>    | 325.2347 | 353.2296 | <b>VP</b>     | 169.1335 | 197.1285 |              |          |          |

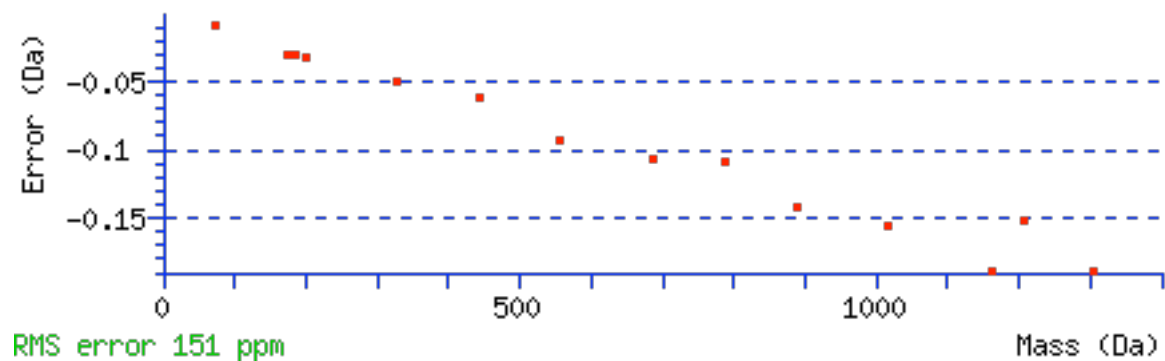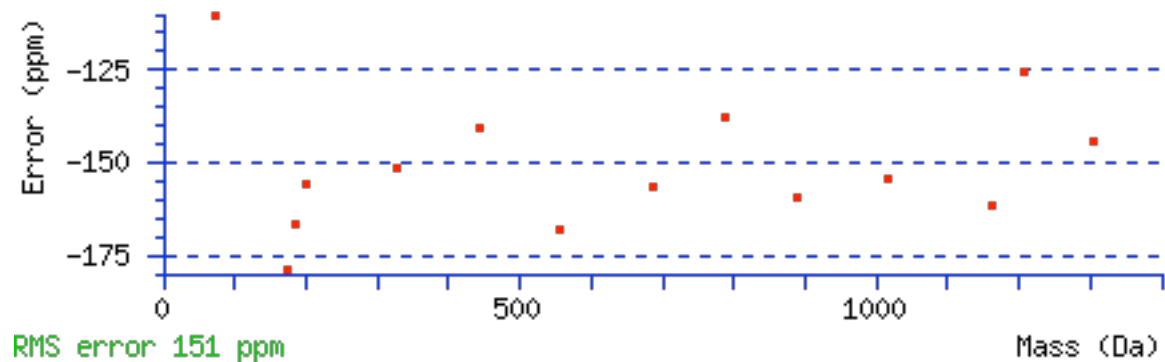

MS/MS Fragmentation of **APVYSGAKPIM**

Found in **XP\_799858**, PREDICTED: hypothetical protein [Strongylocentrotus purpuratus].

Match to Query 105: 1132.374248 from(567.194400,2+) intensity(766.4834)

Data file Maldi\_All.mgf



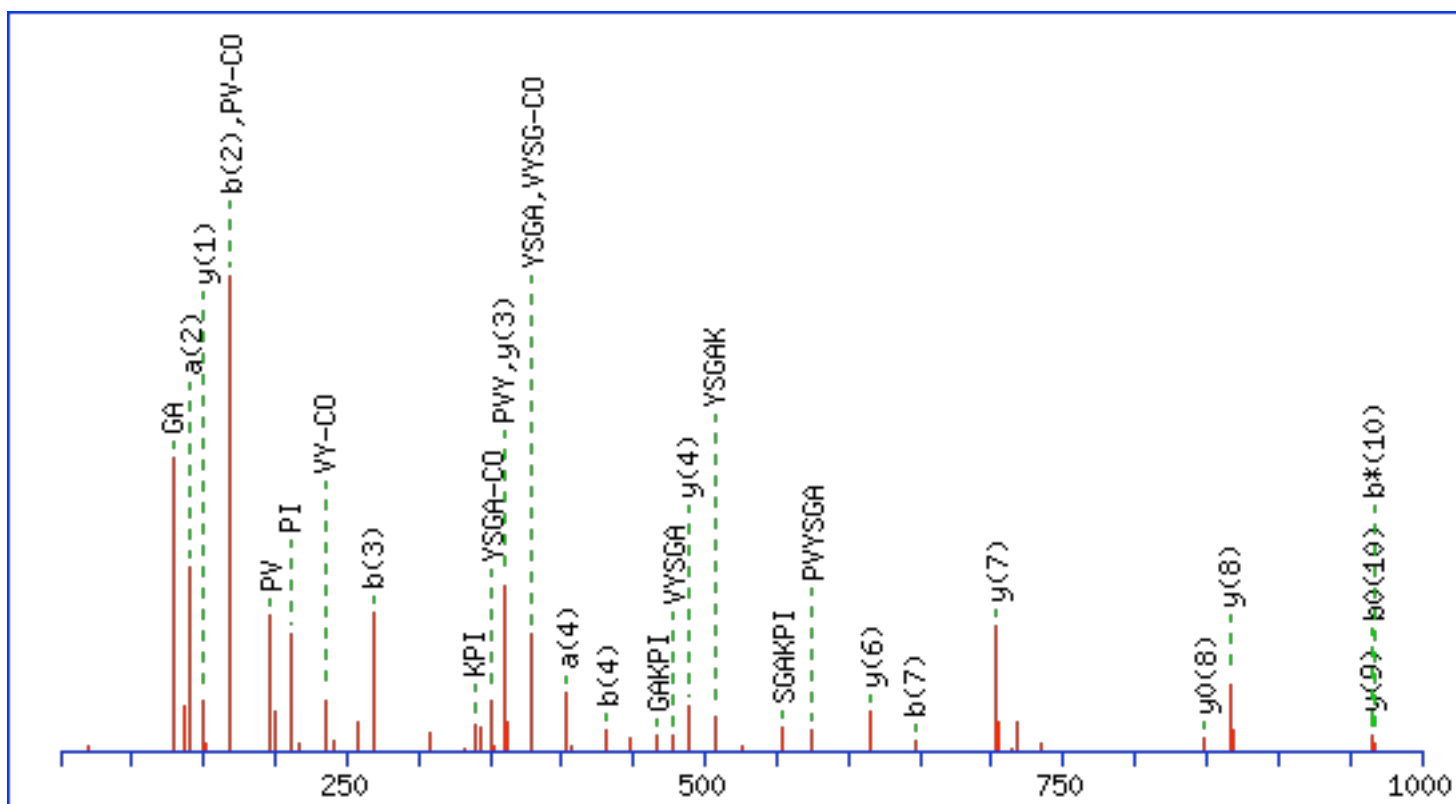

**Monoisotopic mass of neutral peptide Mr(calc): 1132.5950 Ions Score: 62 Expect: 0.012 Matches (Bold Red): 32/133**  
 fragment ions using 33 most intense peaks

| # | Immon.   | a               | a* | a <sup>0</sup> | b               | b* | b <sup>0</sup> | Seq. | y               | y*        | y <sup>0</sup>  | #  |
|---|----------|-----------------|----|----------------|-----------------|----|----------------|------|-----------------|-----------|-----------------|----|
| 1 | 44.0495  | 44.0495         |    |                | 72.0444         |    |                | A    |                 |           |                 | 11 |
| 2 | 70.0651  | <b>141.1022</b> |    |                | <b>169.0972</b> |    |                | P    | 1062.5652       | 1045.5387 | 1044.5547       | 10 |
| 3 | 72.0808  | 240.1707        |    |                | <b>268.1656</b> |    |                | V    | <b>965.5125</b> | 948.4859  | 947.5019        | 9  |
| 4 | 136.0757 | <b>403.2340</b> |    |                | <b>431.2289</b> |    |                | Y    | <b>866.4441</b> | 849.4175  | <b>848.4335</b> | 8  |

|    |          |          |          |          |          |          |          |   |          |          |          |   |
|----|----------|----------|----------|----------|----------|----------|----------|---|----------|----------|----------|---|
| 5  | 60.0444  | 490.2660 |          | 472.2554 | 518.2609 |          | 500.2504 | S | 703.3807 | 686.3542 | 685.3702 | 7 |
| 6  | 30.0338  | 547.2875 |          | 529.2769 | 575.2824 |          | 557.2718 | G | 616.3487 | 599.3221 |          | 6 |
| 7  | 44.0495  | 618.3246 |          | 600.3140 | 646.3195 |          | 628.3089 | A | 559.3272 | 542.3007 |          | 5 |
| 8  | 101.1073 | 746.4196 | 729.3930 | 728.4090 | 774.4145 | 757.3879 | 756.4039 | K | 488.2901 | 471.2636 |          | 4 |
| 9  | 70.0651  | 843.4723 | 826.4458 | 825.4618 | 871.4672 | 854.4407 | 853.4567 | P | 360.1952 |          |          | 3 |
| 10 | 86.0964  | 956.5564 | 939.5298 | 938.5458 | 984.5513 | 967.5247 | 966.5407 | I | 263.1424 |          |          | 2 |
| 11 | 104.0528 |          |          |          |          |          |          | M | 150.0583 |          |          | 1 |

| Seq   | ya       | yb       | Seq    | ya       | yb       | Seq     | ya       | yb       |
|-------|----------|----------|--------|----------|----------|---------|----------|----------|
| PV    | 169.1335 | 197.1285 | PVY    | 332.1969 | 360.1918 | PVYS    | 419.2289 | 447.2238 |
| PVYSG | 476.2504 | 504.2453 | PVYSGA | 547.2875 | 575.2824 | PVYSGAK | 675.3824 | 703.3774 |
| VY    | 235.1441 | 263.1390 | VYS    | 322.1761 | 350.1710 | VYSG    | 379.1976 | 407.1925 |
| VYSGA | 450.2347 | 478.2296 | VYSGAK | 578.3297 | 606.3246 | VYSGAKP | 675.3824 | 703.3774 |
| YS    | 223.1077 | 251.1026 | YSG    | 280.1292 | 308.1241 | YSGA    | 351.1663 | 379.1612 |
| YSGAK | 479.2613 | 507.2562 | YSGAKP | 576.3140 | 604.3089 | YSGAKPI | 689.3981 | 717.3930 |
| SG    | 117.0659 | 145.0608 | SGA    | 188.1030 | 216.0979 | SGAK    | 316.1979 | 344.1928 |
| SGAKP | 413.2507 | 441.2456 | SGAKPI | 526.3348 | 554.3297 | GA      | 101.0709 | 129.0659 |
| GAK   | 229.1659 | 257.1608 | GAKP   | 326.2187 | 354.2136 | GAKPI   | 439.3027 | 467.2976 |
| AK    | 172.1444 | 200.1394 | AKP    | 269.1972 | 297.1921 | AKPI    | 382.2813 | 410.2762 |
| KP    | 198.1601 | 226.1550 | KPI    | 311.2442 | 339.2391 | PI      | 183.1492 | 211.1441 |

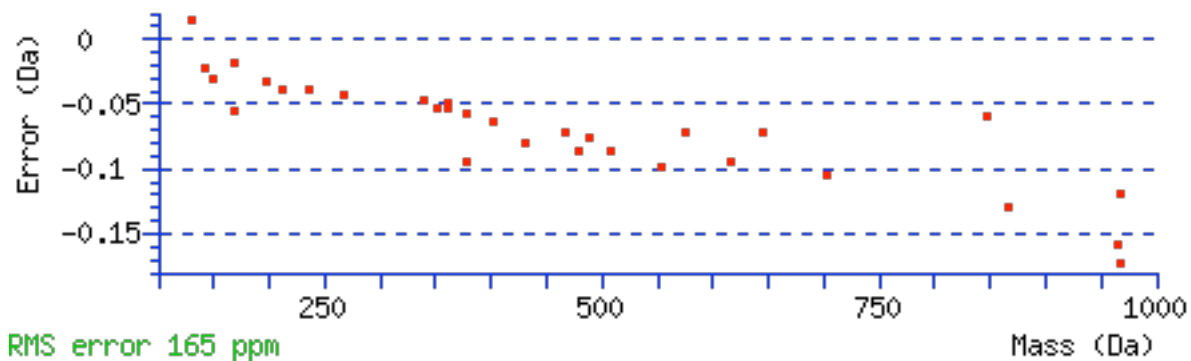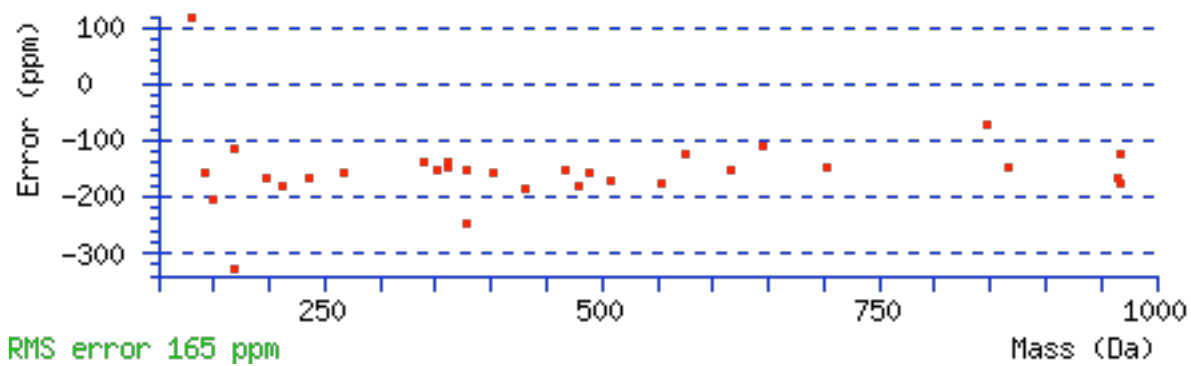

MS/MS Fragmentation of **SINSYLPGDMVRHVS**

Found in **XP\_799858**, PREDICTED: hypothetical protein [Strongylocentrotus purpuratus].

Match to Query 695: 1673.826648 from(837.920600,2+) intensity(119524.0000)

Title: Cmpd 155, +MSn(838.4670), 28.2 min

Data file Qtof\_all.mgf

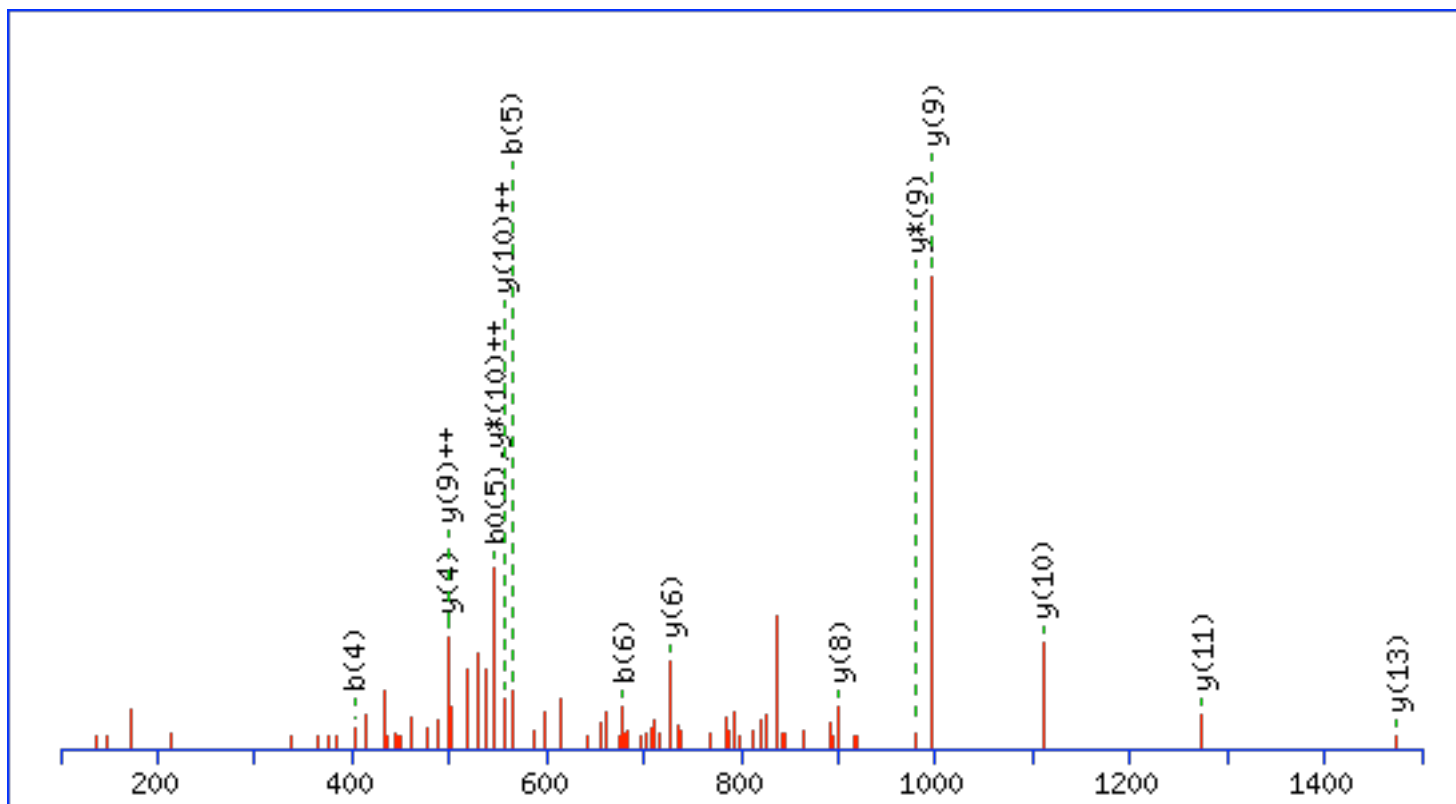

Monoisotopic mass of neutral peptide  $M_r(\text{calc})$ : 1673.8195 Ions Score: 42 Expect: 0.76 Matches (**Bold Red**): 15/158  
 fragment ions using 24 most intense peaks

| # | b               | b <sup>++</sup> | b <sup>*</sup> | b <sup>*++</sup> | b <sup>0</sup> | b <sup>0++</sup> | Seq. | y                | y <sup>++</sup> | y <sup>*</sup> | y <sup>*++</sup> | y <sup>0</sup> | y <sup>0++</sup> | #  |
|---|-----------------|-----------------|----------------|------------------|----------------|------------------|------|------------------|-----------------|----------------|------------------|----------------|------------------|----|
| 1 | 88.0393         | 44.5233         |                |                  | 70.0287        | 35.5180          | S    |                  |                 |                |                  |                |                  | 15 |
| 2 | 201.1234        | 101.0653        |                |                  | 183.1128       | 92.0600          | I    | 1587.7948        | 794.4010        | 1570.7682      | 785.8878         | 1569.7842      | 785.3957         | 14 |
| 3 | 315.1663        | 158.0868        | 298.1397       | 149.5735         | 297.1557       | 149.0815         | N    | <b>1474.7107</b> | 737.8590        | 1457.6842      | 729.3457         | 1456.7002      | 728.8537         | 13 |
| 4 | <b>402.1983</b> | 201.6028        | 385.1718       | 193.0895         | 384.1878       | 192.5975         | S    | 1360.6678        | 680.8375        | 1343.6412      | 672.3243         | 1342.6572      | 671.8323         | 12 |

|           |                 |          |           |          |                 |          |          |                  |                 |                 |                 |           |          |           |
|-----------|-----------------|----------|-----------|----------|-----------------|----------|----------|------------------|-----------------|-----------------|-----------------|-----------|----------|-----------|
| <b>5</b>  | <b>565.2617</b> | 283.1345 | 548.2351  | 274.6212 | <b>547.2511</b> | 274.1292 | <b>Y</b> | <b>1273.6358</b> | 637.3215        | 1256.6092       | 628.8082        | 1255.6252 | 628.3162 | <b>11</b> |
| <b>6</b>  | <b>678.3457</b> | 339.6765 | 661.3192  | 331.1632 | 660.3352        | 330.6712 | <b>L</b> | <b>1110.5724</b> | <b>555.7899</b> | 1093.5459       | <b>547.2766</b> | 1092.5619 | 546.7846 | <b>10</b> |
| <b>7</b>  | 775.3985        | 388.2029 | 758.3719  | 379.6896 | 757.3879        | 379.1976 | <b>P</b> | <b>997.4884</b>  | <b>499.2478</b> | <b>980.4618</b> | 490.7346        | 979.4778  | 490.2425 | <b>9</b>  |
| <b>8</b>  | 832.4199        | 416.7136 | 815.3934  | 408.2003 | 814.4094        | 407.7083 | <b>G</b> | <b>900.4356</b>  | 450.7214        | 883.4091        | 442.2082        | 882.4250  | 441.7162 | <b>8</b>  |
| <b>9</b>  | 947.4469        | 474.2271 | 930.4203  | 465.7138 | 929.4363        | 465.2218 | <b>D</b> | 843.4141         | 422.2107        | 826.3876        | 413.6974        | 825.4036  | 413.2054 | <b>7</b>  |
| <b>10</b> | 1078.4874       | 539.7473 | 1061.4608 | 531.2340 | 1060.4768       | 530.7420 | <b>M</b> | <b>728.3872</b>  | 364.6972        | 711.3607        | 356.1840        | 710.3766  | 355.6920 | <b>6</b>  |
| <b>11</b> | 1177.5558       | 589.2815 | 1160.5292 | 580.7683 | 1159.5452       | 580.2762 | <b>V</b> | 597.3467         | 299.1770        | 580.3202        | 290.6637        | 579.3362  | 290.1717 | <b>5</b>  |
| <b>12</b> | 1333.6569       | 667.3321 | 1316.6303 | 658.8188 | 1315.6463       | 658.3268 | <b>R</b> | <b>498.2783</b>  | 249.6428        | 481.2518        | 241.1295        | 480.2677  | 240.6375 | <b>4</b>  |
| <b>13</b> | 1470.7158       | 735.8615 | 1453.6893 | 727.3483 | 1452.7052       | 726.8563 | <b>H</b> | 342.1772         | 171.5922        |                 |                 | 324.1666  | 162.5870 | <b>3</b>  |
| <b>14</b> | 1569.7842       | 785.3957 | 1552.7577 | 776.8825 | 1551.7737       | 776.3905 | <b>V</b> | 205.1183         | 103.0628        |                 |                 | 187.1077  | 94.0575  | <b>2</b>  |
| <b>15</b> |                 |          |           |          |                 |          | <b>S</b> | 106.0499         | 53.5286         |                 |                 | 88.0393   | 44.5233  | <b>1</b>  |

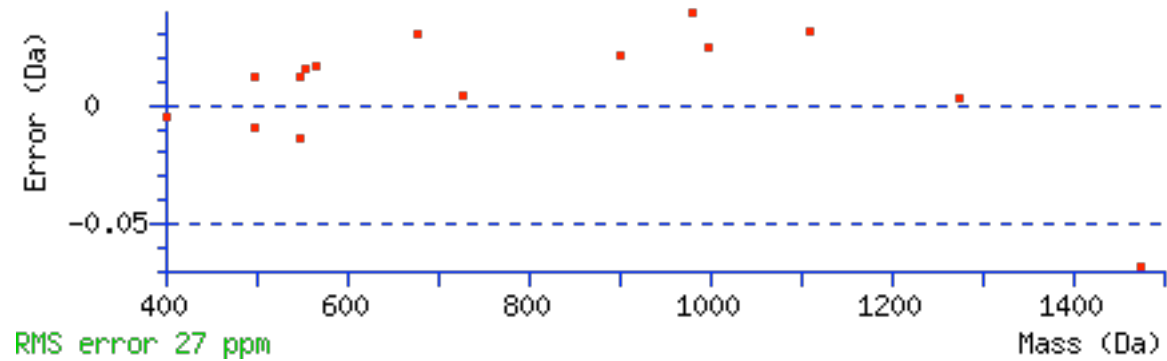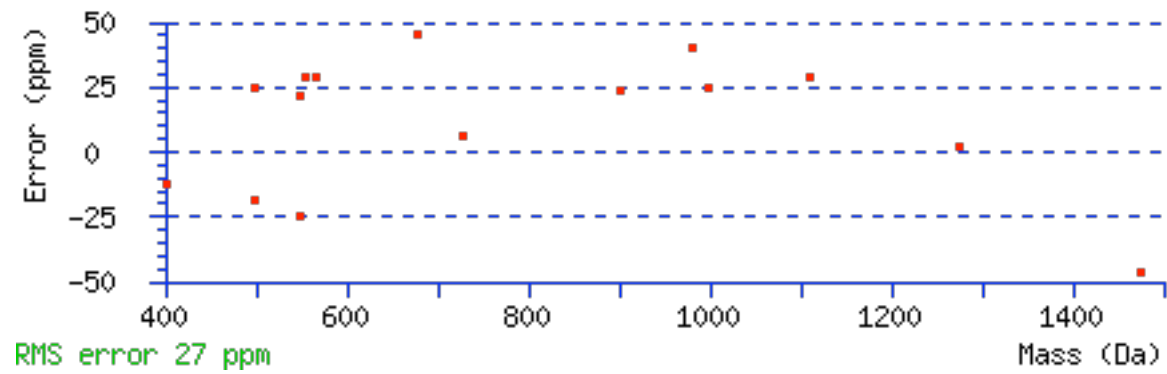

MS/MS Fragmentation of **SLKNRQLFTQTRNKY**

Found in **XP\_799858**, PREDICTED: hypothetical protein [Strongylocentrotus purpuratus].

Match to Query 332: 1895.491696 from(474.880200,4+) intensity(558.8305)

Data file Maldi\_All.mgf

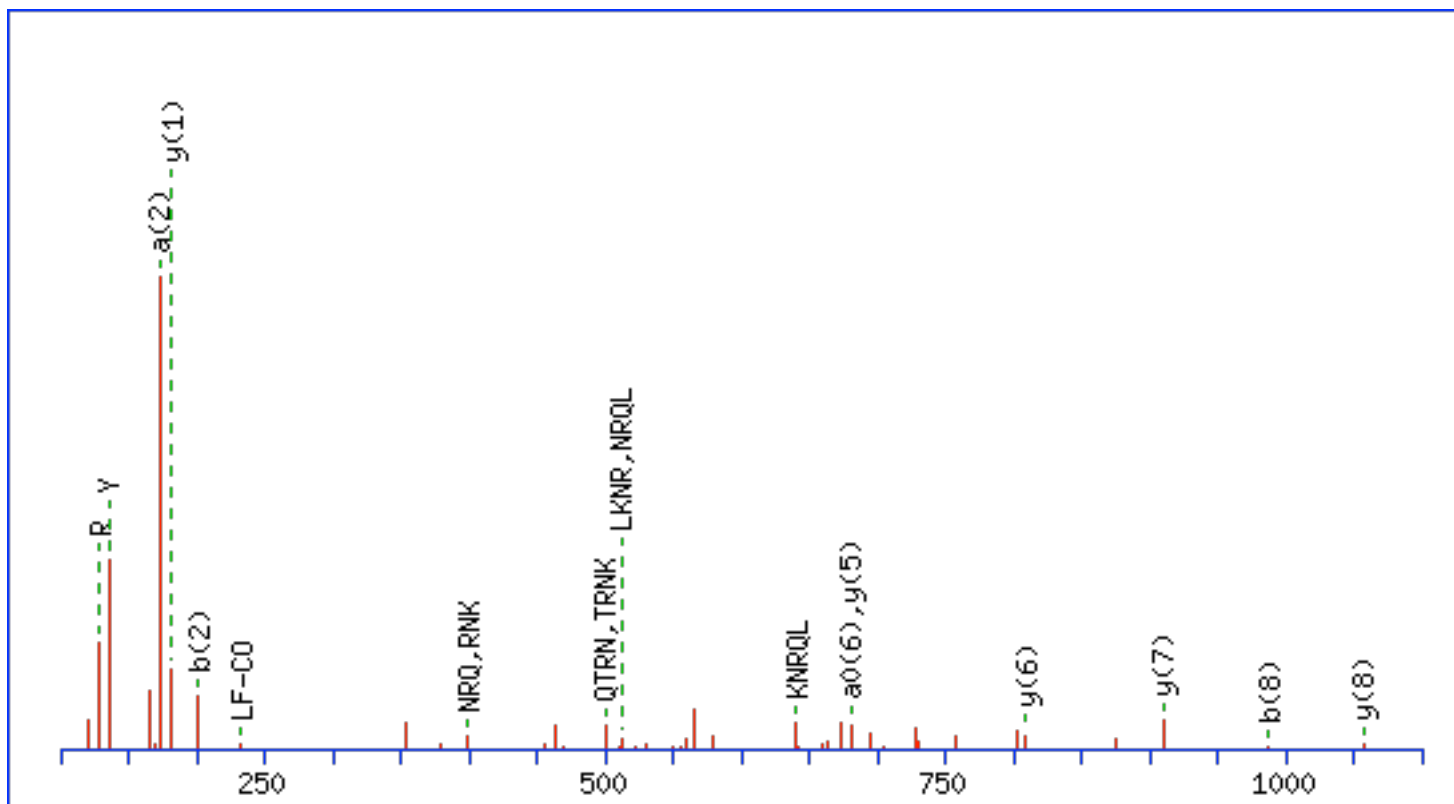

**Monoisotopic mass of neutral peptide Mr(calc): 1896.0329 Ions Score: 18 Expect: 4.1e+02 Matches (Bold Red):**  
 22/251 fragment ions using 29 most intense peaks

| # | Immon.  | a               | a* | a <sup>0</sup> | b               | b* | b <sup>0</sup> | d | d' | Seq. | v             | w             | w' | y             | y*            | y <sup>0</sup> | #  |
|---|---------|-----------------|----|----------------|-----------------|----|----------------|---|----|------|---------------|---------------|----|---------------|---------------|----------------|----|
| 1 | 60.0444 | 60.0444         |    | 42.0338        | 88.0393         |    | 70.0287        |   |    | S    |               |               |    |               |               |                | 15 |
| 2 | 86.0964 | <b>173.1285</b> |    | 155.1179       | <b>201.1234</b> |    | 183.1128       |   |    | L    | 1751.930<br>0 | 1750.934<br>7 |    | 1810.008<br>2 | 1792.981<br>7 | 1791.997<br>7  | 14 |

|    |                     |               |               |                 |                 |               |               |               |               |   |               |               |              |                      |               |               |        |
|----|---------------------|---------------|---------------|-----------------|-----------------|---------------|---------------|---------------|---------------|---|---------------|---------------|--------------|----------------------|---------------|---------------|--------|
| 3  | 101.107<br>3        | 301.2234      | 284.1969      | 283.2129        | 329.2183        | 312.1918      | 311.2078      |               |               | K | 1623.835<br>0 | 1622.839<br>8 |              | 1696.924<br>2        | 1679.897<br>6 | 1678.913<br>6 | 1<br>3 |
| 4  | 87.0553             | 415.2663      | 398.2398      | 397.2558        | 443.2613        | 426.2347      | 425.2507      |               |               | N | 1509.792<br>1 | 1508.796<br>8 |              | 1568.829<br>2        | 1551.802<br>7 | 1550.818<br>6 | 1<br>2 |
| 5  | <b>129.113</b><br>5 | 571.3675      | 554.3409      | 553.3569        | 599.3624        | 582.3358      | 581.3518      | 486.3035      |               | R | 1353.691<br>0 | 1352.695<br>7 |              | 1454.786<br>3        | 1437.759<br>7 | 1436.775<br>7 | 1<br>1 |
| 6  | 101.070<br>9        | 699.4260      | 682.3995      | <b>681.4155</b> | 727.4209        | 710.3944      | 709.4104      | 642.4046      |               | Q | 1225.632<br>4 | 1224.637<br>2 |              | 1298.685<br>2        | 1281.658<br>6 | 1280.674<br>6 | 1<br>0 |
| 7  | 86.0964             | 812.5101      | 795.4835      | 794.4995        | 840.5050        | 823.4785      | 822.4944      | 770.4631      |               | L | 1112.548<br>3 | 1111.553<br>1 |              | 1170.626<br>6        | 1153.600<br>0 | 1152.616<br>0 | 9      |
| 8  | 120.080<br>8        | 959.5785      | 942.5520      | 941.5679        | <b>987.5734</b> | 970.5469      | 969.5629      |               |               | F | 965.4799      |               |              | <b>1057.542</b><br>5 | 1040.516<br>0 | 1039.532<br>0 | 8      |
| 9  | 74.0600             | 1060.626<br>2 | 1043.599<br>6 | 1042.615<br>6   | 1088.621<br>1   | 1071.594<br>6 | 1070.610<br>5 | 1044.631<br>3 | 1046.610<br>5 | T | 864.4322      | 877.4526      | 879.431<br>9 | <b>910.4741</b>      | 893.4476      | 892.4635      | 7      |
| 10 | 101.070<br>9        | 1188.684<br>8 | 1171.658<br>2 | 1170.674<br>2   | 1216.679<br>7   | 1199.653<br>1 | 1198.669<br>1 | 1131.663<br>3 |               | Q | 736.3737      | 735.3784      |              | <b>809.4264</b>      | 792.3999      | 791.4159      | 6      |
| 11 | 74.0600             | 1289.732<br>4 | 1272.705<br>9 | 1271.721<br>9   | 1317.727<br>4   | 1300.700<br>8 | 1299.716<br>8 | 1273.737<br>5 | 1275.716<br>8 | T | 635.3260      | 648.3464      | 650.325<br>7 | <b>681.3679</b>      | 664.3413      | 663.3573      | 5      |
| 12 | <b>129.113</b><br>5 | 1445.833<br>6 | 1428.807<br>0 | 1427.823<br>0   | 1473.828<br>5   | 1456.801<br>9 | 1455.817<br>9 | 1360.769<br>6 |               | R | 479.2249      | 478.2296      |              | 580.3202             | 563.2936      |               | 4      |
| 13 | 87.0553             | 1559.876<br>5 | 1542.849<br>9 | 1541.865<br>9   | 1587.871<br>4   | 1570.844<br>9 | 1569.860<br>8 | 1516.870<br>7 |               | N |               |               |              | 424.2191             | 407.1925      |               | 3      |
| 14 | 101.107<br>3        | 1687.971<br>4 | 1670.944<br>9 | 1669.960<br>9   | 1715.966<br>4   | 1698.939<br>8 | 1697.955<br>8 | 1630.913<br>6 |               | K |               |               |              | 310.1761             | 293.1496      |               | 2      |
| 15 | <b>136.075</b><br>7 |               |               |                 |                 |               |               |               |               | Y |               |               |              | <b>182.0812</b>      |               |               | 1      |

| Seq | ya       | yb       | Seq | ya       | yb       | Seq  | ya       | yb              |
|-----|----------|----------|-----|----------|----------|------|----------|-----------------|
| LK  | 214.1914 | 242.1863 | LKN | 328.2343 | 356.2292 | LKNR | 484.3354 | <b>512.3303</b> |



|       |                 |                 |       |          |                 |        |          |                 |
|-------|-----------------|-----------------|-------|----------|-----------------|--------|----------|-----------------|
| LKNRQ | 612.3940        | <b>640.3889</b> | KN    | 215.1503 | 243.1452        | KNR    | 371.2514 | <b>399.2463</b> |
| KNRQ  | 499.3099        | 527.3049        | KNRQL | 612.3940 | <b>640.3889</b> | NR     | 243.1564 | 271.1513        |
| NRQ   | 371.2150        | <b>399.2099</b> | NRQL  | 484.2990 | <b>512.2940</b> | NRQLF  | 631.3675 | 659.3624        |
| RQ    | 257.1721        | 285.1670        | RQL   | 370.2561 | 398.2510        | RQLF   | 517.3245 | 545.3194        |
| RQLFT | 618.3722        | 646.3671        | QL    | 214.1550 | 242.1499        | QLF    | 361.2234 | 389.2183        |
| QLFT  | 462.2711        | 490.2660        | QLFTQ | 590.3297 | 618.3246        | QLFTQT | 691.3774 | 719.3723        |
| LF    | <b>233.1648</b> | 261.1598        | LFT   | 334.2125 | 362.2074        | LFTQ   | 462.2711 | 490.2660        |
| LFTQT | 563.3188        | 591.3137        | FT    | 221.1285 | 249.1234        | FTQ    | 349.1870 | 377.1819        |
| FTQT  | 450.2347        | 478.2296        | FTQTR | 606.3358 | 634.3307        | TQ     | 202.1186 | 230.1135        |
| TQT   | 303.1663        | 331.1612        | TQTR  | 459.2674 | 487.2623        | TQTRN  | 573.3103 | 601.3053        |
| QT    | 202.1186        | 230.1135        | QTR   | 358.2197 | 386.2146        | QTRN   | 472.2627 | <b>500.2576</b> |
| QTRNK | 600.3576        | 628.3525        | TR    | 230.1612 | 258.1561        | TRN    | 344.2041 | 372.1990        |
| TRNK  | 472.2990        | <b>500.2940</b> | RN    | 243.1564 | 271.1513        | RNK    | 371.2514 | <b>399.2463</b> |
| NK    | 215.1503        | 243.1452        |       |          |                 |        |          |                 |

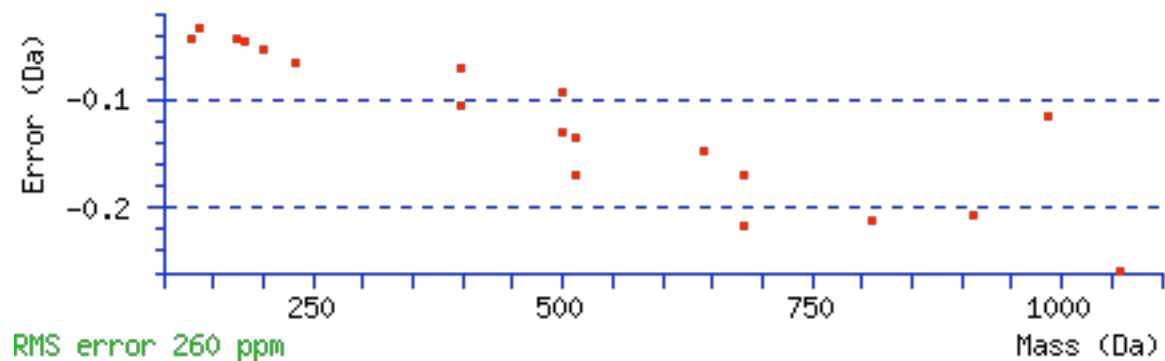

RMS error 260 ppm

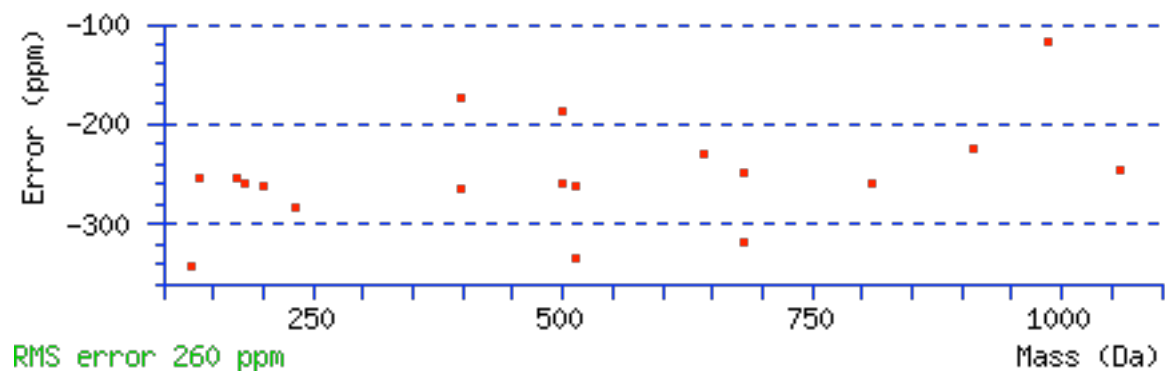

RMS error 260 ppm

MS/MS Fragmentation of **YEEPIRQEGGD**

Found in **XP\_001175555**, PREDICTED: hypothetical protein [Strongylocentrotus purpuratus].

Match to Query 475: 1291.590148 from(646.802350,2+) intensity(613940.0000)

Title: Cmpd 86, +MSn(647.1935), 23.1 min

Data file Qtof\_all.mgf

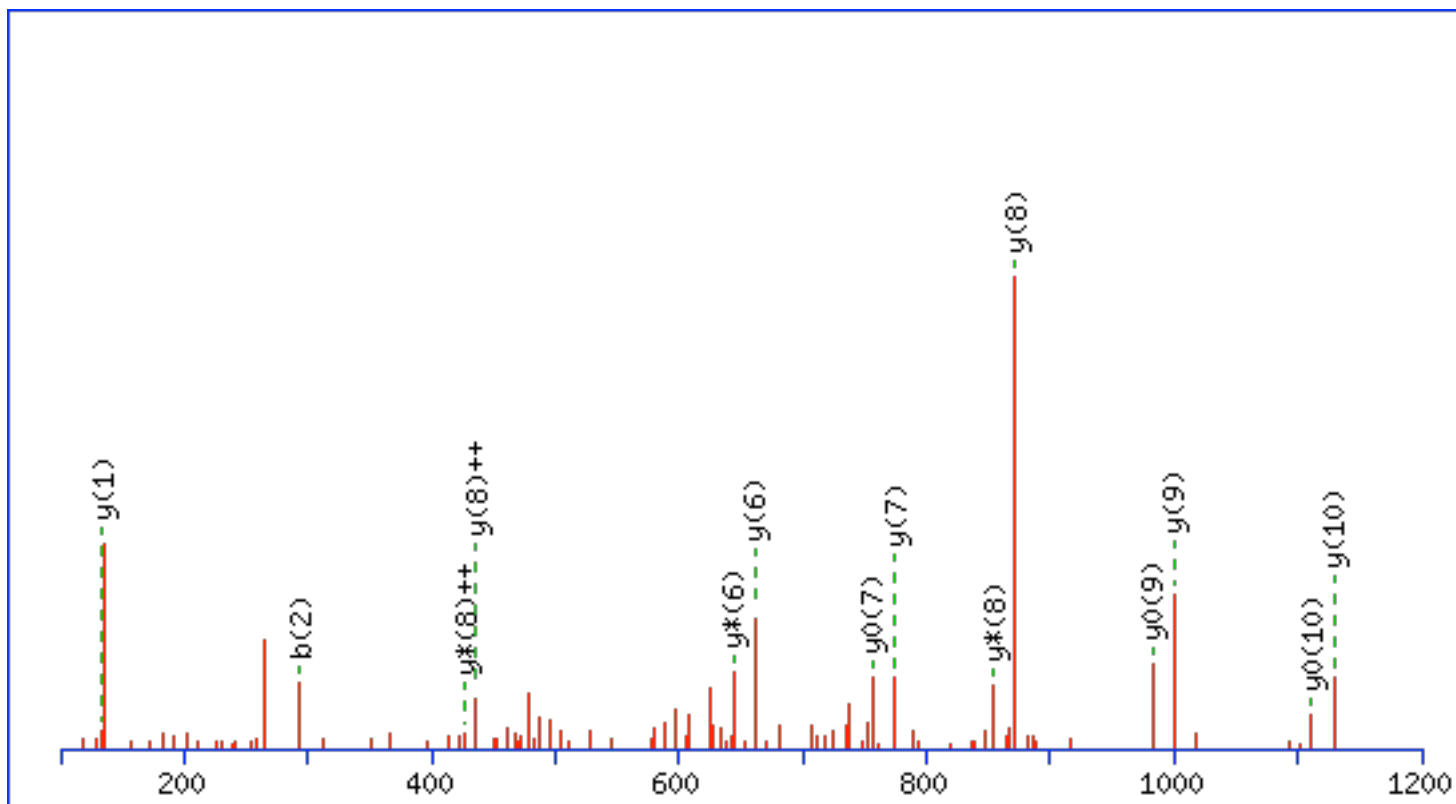

**Monoisotopic mass of neutral peptide Mr(calc): 1291.5680 Ions Score: 39 Expect: 1.7 Matches (Bold Red): 14/100**  
 fragment ions using 25 most intense peaks

| # | b               | b <sup>++</sup> | b <sup>*</sup> | b <sup>*++</sup> | b <sup>0</sup> | b <sup>0++</sup> | Seq. | y                | y <sup>++</sup> | y <sup>*</sup>  | y <sup>*++</sup> | y <sup>0</sup>   | y <sup>0++</sup> | #  |
|---|-----------------|-----------------|----------------|------------------|----------------|------------------|------|------------------|-----------------|-----------------|------------------|------------------|------------------|----|
| 1 | 164.0706        | 82.5389         |                |                  |                |                  | Y    |                  |                 |                 |                  |                  |                  | 11 |
| 2 | <b>293.1132</b> | 147.0602        |                |                  | 275.1026       | 138.0550         | E    | <b>1129.5120</b> | 565.2596        | 1112.4855       | 556.7464         | <b>1111.5014</b> | 556.2544         | 10 |
| 3 | 422.1558        | 211.5815        |                |                  | 404.1452       | 202.5763         | E    | <b>1000.4694</b> | 500.7383        | 983.4429        | 492.2251         | <b>982.4588</b>  | 491.7331         | 9  |
| 4 | 519.2086        | 260.1079        |                |                  | 501.1980       | 251.1026         | P    | <b>871.4268</b>  | <b>436.2170</b> | <b>854.4003</b> | <b>427.7038</b>  | 853.4163         | 427.2118         | 8  |

|           |           |          |           |          |           |          |          |                 |          |                 |          |                 |          |          |
|-----------|-----------|----------|-----------|----------|-----------|----------|----------|-----------------|----------|-----------------|----------|-----------------|----------|----------|
| <b>5</b>  | 632.2926  | 316.6499 |           |          | 614.2821  | 307.6447 | <b>I</b> | <b>774.3741</b> | 387.6907 | 757.3475        | 379.1774 | <b>756.3635</b> | 378.6854 | <b>7</b> |
| <b>6</b>  | 788.3937  | 394.7005 | 771.3672  | 386.1872 | 770.3832  | 385.6952 | <b>R</b> | <b>661.2900</b> | 331.1486 | <b>644.2634</b> | 322.6354 | 643.2794        | 322.1434 | <b>6</b> |
| <b>7</b>  | 916.4523  | 458.7298 | 899.4258  | 450.2165 | 898.4417  | 449.7245 | <b>Q</b> | 505.1889        | 253.0981 | 488.1623        | 244.5848 | 487.1783        | 244.0928 | <b>5</b> |
| <b>8</b>  | 1045.4949 | 523.2511 | 1028.4684 | 514.7378 | 1027.4843 | 514.2458 | <b>E</b> | 377.1303        | 189.0688 |                 |          | 359.1197        | 180.0635 | <b>4</b> |
| <b>9</b>  | 1102.5164 | 551.7618 | 1085.4898 | 543.2485 | 1084.5058 | 542.7565 | <b>G</b> | 248.0877        | 124.5475 |                 |          | 230.0771        | 115.5422 | <b>3</b> |
| <b>10</b> | 1159.5378 | 580.2726 | 1142.5113 | 571.7593 | 1141.5273 | 571.2673 | <b>G</b> | 191.0662        | 96.0368  |                 |          | 173.0557        | 87.0315  | <b>2</b> |
| <b>11</b> |           |          |           |          |           |          | <b>D</b> | <b>134.0448</b> | 67.5260  |                 |          | 116.0342        | 58.5207  | <b>1</b> |

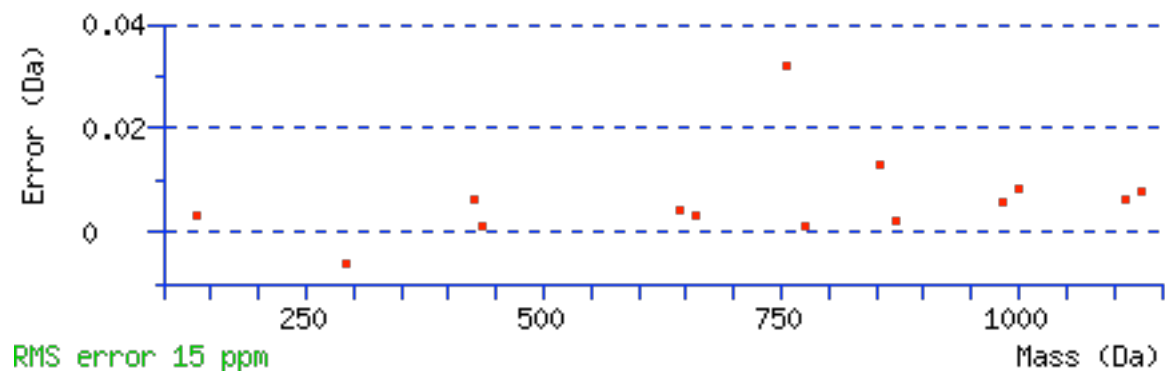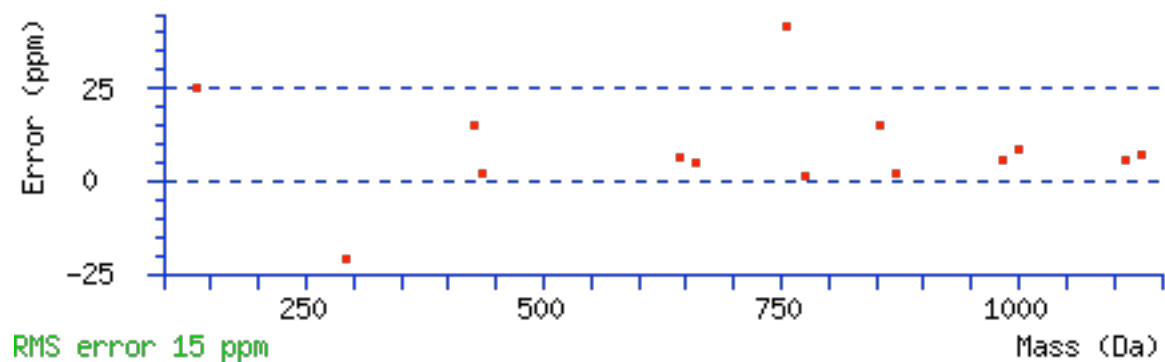

MS/MS Fragmentation of **SIKADGEVTEDVDK**

Found in **XP\_001188391**, PREDICTED: similar to arginine/serine-rich splicing factor 4 [Strongylocentrotus purpuratus].

Match to Query 633: 1504.763968 from(753.389260,2+) intensity(556664.0000)

Title: Cmpd 152, +MSn(753.7278), 28.1 min

Data file Qtof\_all.mgf

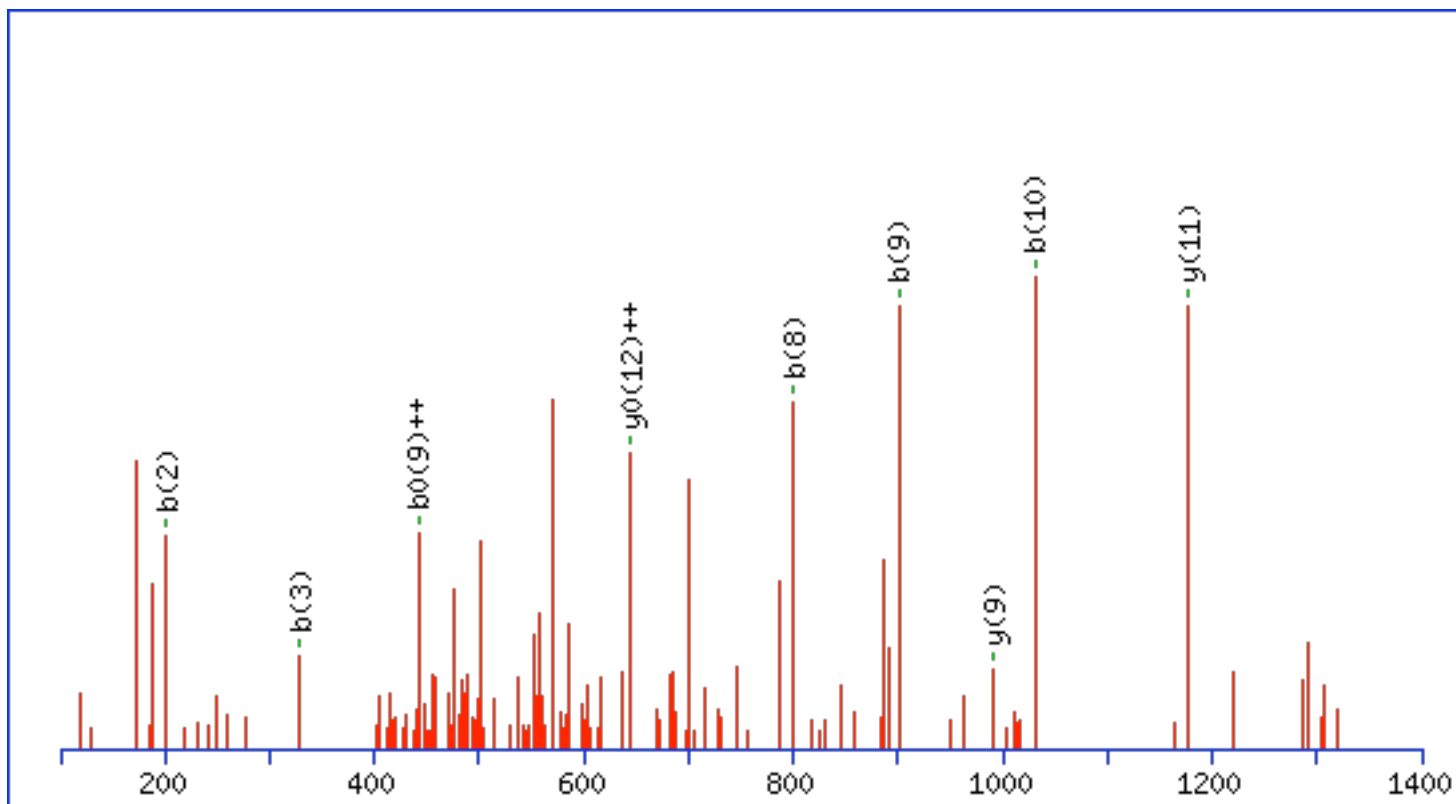

**Monoisotopic mass of neutral peptide Mr(calc): 1504.7257 Ions Score: 21 Expect: 1e+02 Matches (Bold Red): 9/150**  
 fragment ions using 14 most intense peaks

| # | b               | b <sup>++</sup> | b <sup>*</sup> | b <sup>***</sup> | b <sup>0</sup> | b <sup>0++</sup> | Seq. | y                | y <sup>++</sup> | y <sup>*</sup> | y <sup>***</sup> | y <sup>0</sup> | y <sup>0++</sup> | #  |
|---|-----------------|-----------------|----------------|------------------|----------------|------------------|------|------------------|-----------------|----------------|------------------|----------------|------------------|----|
| 1 | 88.0393         | 44.5233         |                |                  | 70.0287        | 35.5180          | S    |                  |                 |                |                  |                |                  | 14 |
| 2 | <b>201.1234</b> | 101.0653        |                |                  | 183.1128       | 92.0600          | I    | 1418.7009        | 709.8541        | 1401.6744      | 701.3408         | 1400.6904      | 700.8488         | 13 |
| 3 | <b>329.2183</b> | 165.1128        | 312.1918       | 156.5995         | 311.2078       | 156.1075         | K    | 1305.6169        | 653.3121        | 1288.5903      | 644.7988         | 1287.6063      | <b>644.3068</b>  | 12 |
| 4 | 400.2554        | 200.6314        | 383.2289       | 192.1181         | 382.2449       | 191.6261         | A    | <b>1177.5219</b> | 589.2646        | 1160.4954      | 580.7513         | 1159.5113      | 580.2593         | 11 |

|           |                  |          |           |          |           |                 |          |                 |          |           |          |           |          |           |
|-----------|------------------|----------|-----------|----------|-----------|-----------------|----------|-----------------|----------|-----------|----------|-----------|----------|-----------|
| <b>5</b>  | 515.2824         | 258.1448 | 498.2558  | 249.6316 | 497.2718  | 249.1395        | <b>D</b> | 1106.4848       | 553.7460 | 1089.4582 | 545.2328 | 1088.4742 | 544.7408 | <b>10</b> |
| <b>6</b>  | 572.3039         | 286.6556 | 555.2773  | 278.1423 | 554.2933  | 277.6503        | <b>G</b> | <b>991.4578</b> | 496.2326 | 974.4313  | 487.7193 | 973.4473  | 487.2273 | <b>9</b>  |
| <b>7</b>  | 701.3464         | 351.1769 | 684.3199  | 342.6636 | 683.3359  | 342.1716        | <b>E</b> | 934.4364        | 467.7218 | 917.4098  | 459.2086 | 916.4258  | 458.7165 | <b>8</b>  |
| <b>8</b>  | <b>800.4149</b>  | 400.7111 | 783.3883  | 392.1978 | 782.4043  | 391.7058        | <b>V</b> | 805.3938        | 403.2005 | 788.3672  | 394.6873 | 787.3832  | 394.1953 | <b>7</b>  |
| <b>9</b>  | <b>901.4625</b>  | 451.2349 | 884.4360  | 442.7216 | 883.4520  | <b>442.2296</b> | <b>T</b> | 706.3254        | 353.6663 | 689.2988  | 345.1531 | 688.3148  | 344.6610 | <b>6</b>  |
| <b>10</b> | <b>1030.5051</b> | 515.7562 | 1013.4786 | 507.2429 | 1012.4946 | 506.7509        | <b>E</b> | 605.2777        | 303.1425 | 588.2511  | 294.6292 | 587.2671  | 294.1372 | <b>5</b>  |
| <b>11</b> | 1145.5321        | 573.2697 | 1128.5055 | 564.7564 | 1127.5215 | 564.2644        | <b>D</b> | 476.2351        | 238.6212 | 459.2086  | 230.1079 | 458.2245  | 229.6159 | <b>4</b>  |
| <b>12</b> | 1244.6005        | 622.8039 | 1227.5739 | 614.2906 | 1226.5899 | 613.7986        | <b>V</b> | 361.2082        | 181.1077 | 344.1816  | 172.5944 | 343.1976  | 172.1024 | <b>3</b>  |
| <b>13</b> | 1359.6274        | 680.3174 | 1342.6009 | 671.8041 | 1341.6169 | 671.3121        | <b>D</b> | 262.1397        | 131.5735 | 245.1132  | 123.0602 | 244.1292  | 122.5682 | <b>2</b>  |
| <b>14</b> |                  |          |           |          |           |                 | <b>K</b> | 147.1128        | 74.0600  | 130.0863  | 65.5468  |           |          | <b>1</b>  |

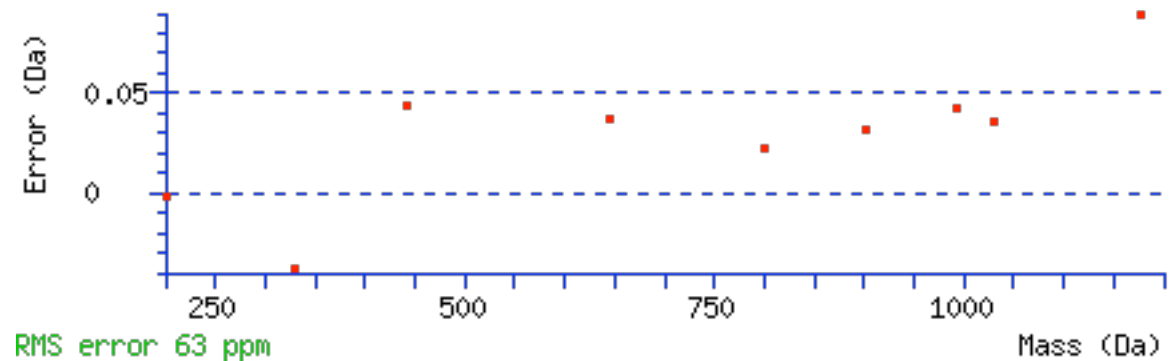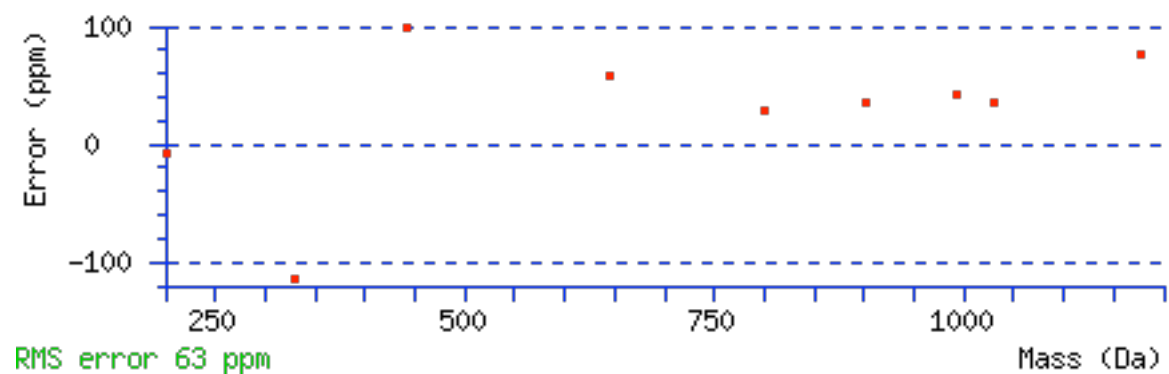

MS/MS Fragmentation of **ANMFRSRLRGN**

Found in **XP\_001188391**, PREDICTED: similar to arginine/serine-rich splicing factor 4 [Strongylocentrotus purpuratus].

Match to Query 489: 1319.743788 from(660.879170,2+) intensity(841204.0000)

Title: Cmpd 76, +MSn(661.3308), 22.3 min

Data file Qtof\_all.mgf



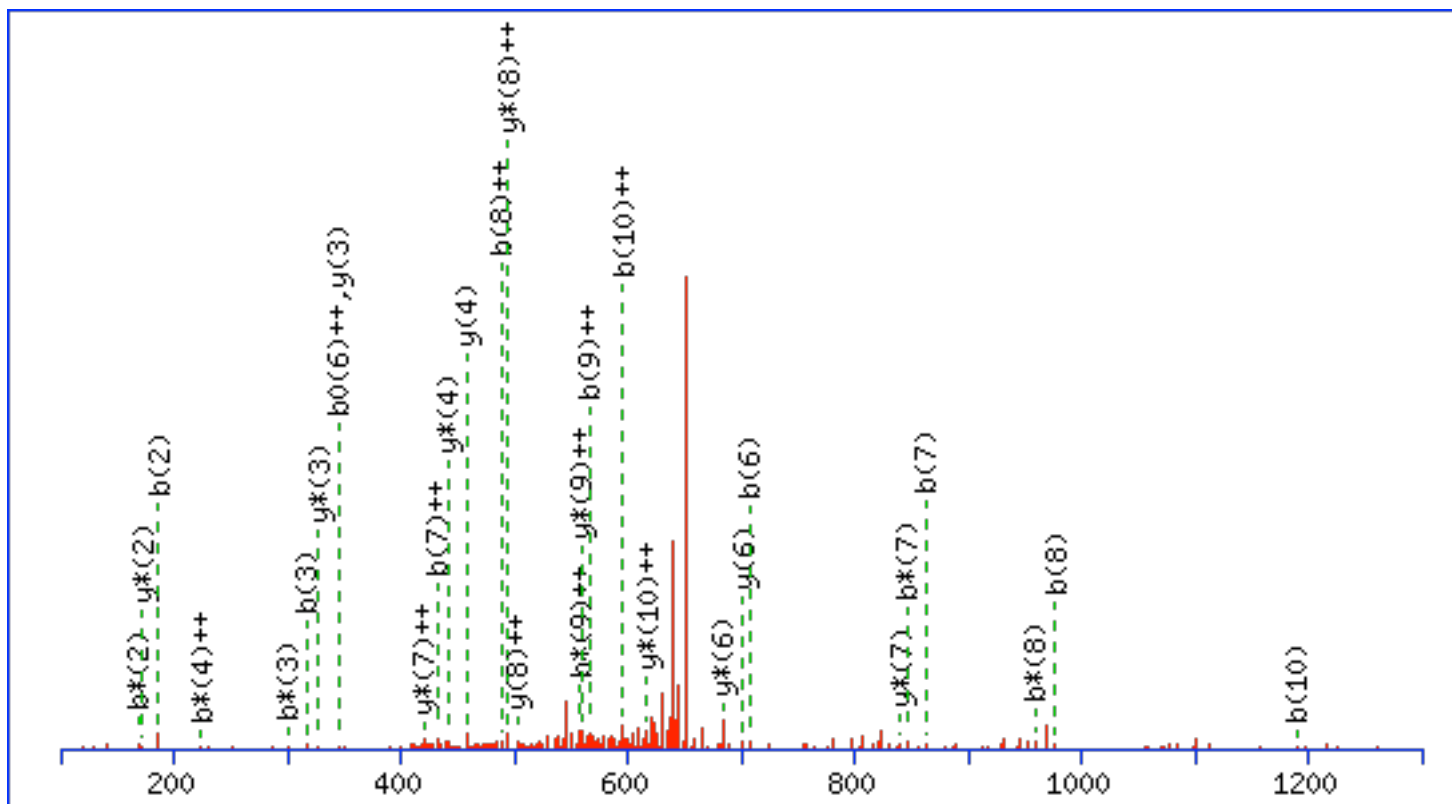

**Monoisotopic mass of neutral peptide Mr(calc):** 1319.6993 **Variable modifications:** C-term : Amidated (C-term) **Ions Score:** 9 **Expect:** 1.2e+03 **Matches (Bold Red):** 30/98 fragment ions using 104 most intense peaks

| # | b               | b <sup>++</sup> | b <sup>*</sup>  | b <sup>*++</sup> | b <sup>0</sup> | b <sup>0++</sup> | Seq. | y         | y <sup>++</sup> | y <sup>*</sup> | y <sup>*++</sup> | y <sup>0</sup> | y <sup>0++</sup> | #  |
|---|-----------------|-----------------|-----------------|------------------|----------------|------------------|------|-----------|-----------------|----------------|------------------|----------------|------------------|----|
| 1 | 72.0444         | 36.5258         |                 |                  |                |                  | A    |           |                 |                |                  |                |                  | 11 |
| 2 | <b>186.0873</b> | 93.5473         | <b>169.0608</b> | 85.0340          |                |                  | N    | 1249.6695 | 625.3384        | 1232.6429      | <b>616.8251</b>  | 1231.6589      | 616.3331         | 10 |
| 3 | <b>317.1278</b> | 159.0675        | <b>300.1013</b> | 150.5543         |                |                  | M    | 1135.6265 | 568.3169        | 1118.6000      | <b>559.8036</b>  | 1117.6160      | 559.3116         | 9  |
| 4 | 464.1962        | 232.6017        | 447.1697        | <b>224.0885</b>  |                |                  | F    | 1004.5860 | <b>502.7967</b> | 987.5595       | <b>494.2834</b>  | 986.5755       | 493.7914         | 8  |

|           |                  |                 |                 |                 |           |                 |          |                 |          |                 |                 |          |          |          |
|-----------|------------------|-----------------|-----------------|-----------------|-----------|-----------------|----------|-----------------|----------|-----------------|-----------------|----------|----------|----------|
| <b>5</b>  | 620.2973         | 310.6523        | 603.2708        | 302.1390        |           |                 | <b>R</b> | 857.5176        | 429.2625 | <b>840.4911</b> | <b>420.7492</b> | 839.5071 | 420.2572 | <b>7</b> |
| <b>6</b>  | <b>707.3294</b>  | 354.1683        | 690.3028        | 345.6550        | 689.3188  | <b>345.1630</b> | <b>S</b> | <b>701.4165</b> | 351.2119 | <b>684.3900</b> | 342.6986        | 683.4060 | 342.2066 | <b>6</b> |
| <b>7</b>  | <b>863.4305</b>  | <b>432.2189</b> | <b>846.4039</b> | 423.7056        | 845.4199  | 423.2136        | <b>R</b> | 614.3845        | 307.6959 | 597.3579        | 299.1826        |          |          | <b>5</b> |
| <b>8</b>  | <b>976.5145</b>  | <b>488.7609</b> | <b>959.4880</b> | 480.2476        | 958.5040  | 479.7556        | <b>L</b> | <b>458.2834</b> | 229.6453 | <b>441.2568</b> | 221.1321        |          |          | <b>4</b> |
| <b>9</b>  | 1132.6156        | <b>566.8115</b> | 1115.5891       | <b>558.2982</b> | 1114.6051 | 557.8062        | <b>R</b> | <b>345.1993</b> | 173.1033 | <b>328.1728</b> | 164.5900        |          |          | <b>3</b> |
| <b>10</b> | <b>1189.6371</b> | <b>595.3222</b> | 1172.6106       | 586.8089        | 1171.6265 | 586.3169        | <b>G</b> | 189.0982        | 95.0527  | <b>172.0717</b> | 86.5395         |          |          | <b>2</b> |
| <b>11</b> |                  |                 |                 |                 |           |                 | <b>N</b> | 132.0767        | 66.5420  | 115.0502        | 58.0287         |          |          | <b>1</b> |

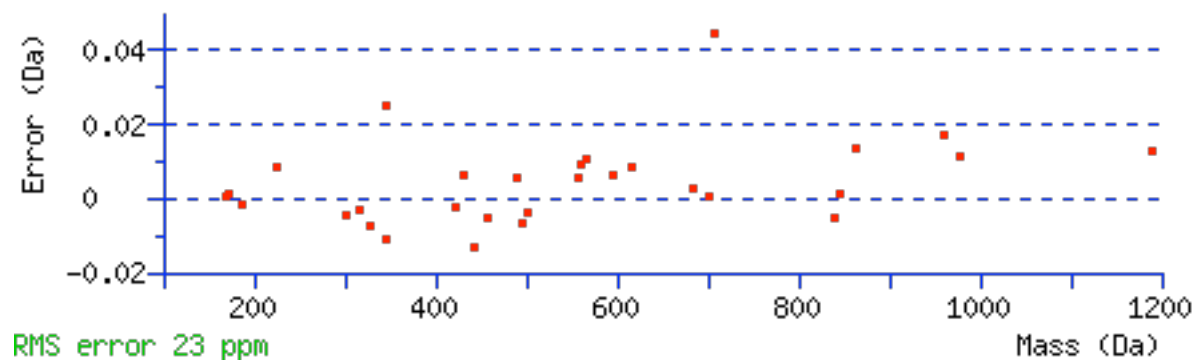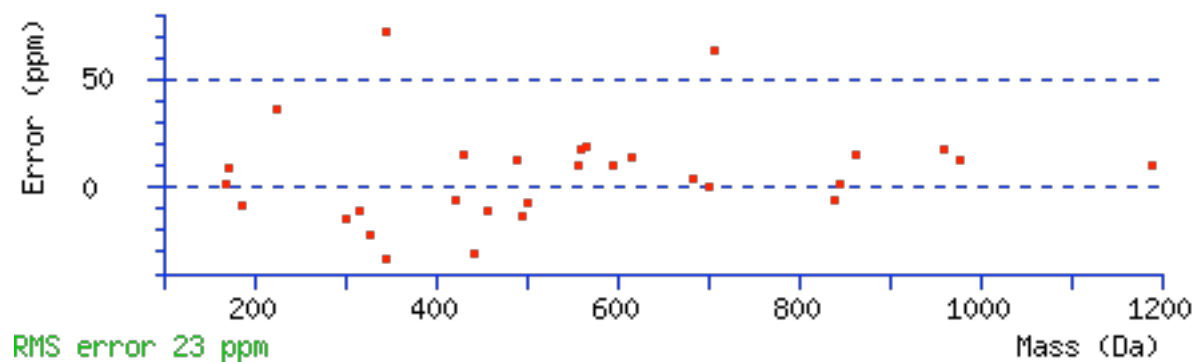

MS/MS Fragmentation of **ANMFRSRLRGK**

Found in **XP\_001188391**, PREDICTED: similar to arginine/serine-rich splicing factor 4 [Strongylocentrotus purpuratus].

Match to Query 501: 1333.796708 from(667.905630,2+) intensity(664260.0000)

Title: Cmpd 64, +MSn(668.3428), 21.0 min

Data file Qtof\_all.mgf

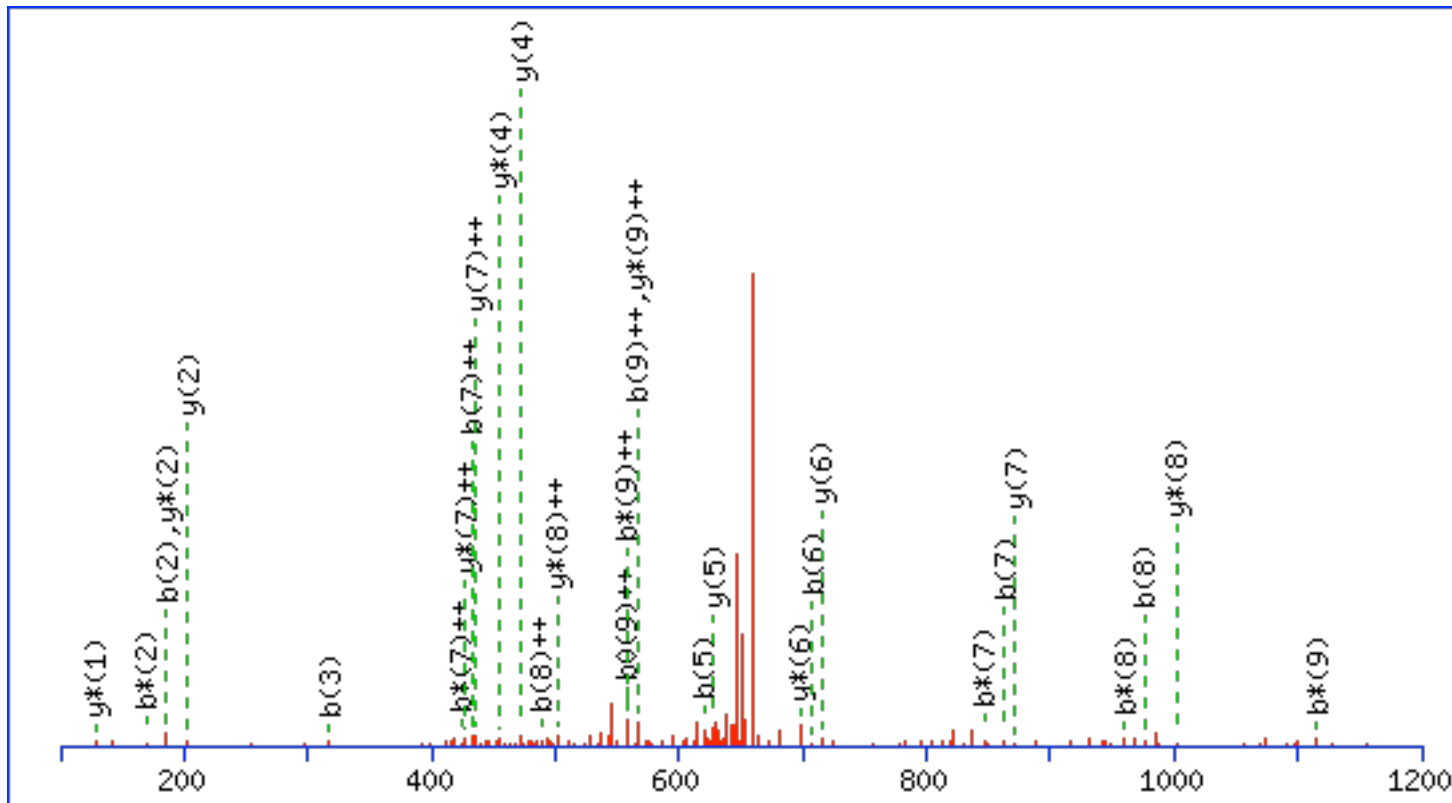

**Monoisotopic mass of neutral peptide Mr(calc):** 1333.7513 **Variable modifications:** C-term : Amidated (C-term) **Ions**  
**Score:** 18 **Expect:** 1e+02 **Matches (Bold Red):** 30/98 fragment ions using 84 most intense peaks

| # | b               | b <sup>++</sup> | b <sup>*</sup>  | b <sup>*++</sup> | b <sup>0</sup> | b <sup>0++</sup> | Seq. | y         | y <sup>++</sup> | y <sup>*</sup>   | y <sup>*++</sup> | y <sup>0</sup> | y <sup>0++</sup> | #  |
|---|-----------------|-----------------|-----------------|------------------|----------------|------------------|------|-----------|-----------------|------------------|------------------|----------------|------------------|----|
| 1 | 72.0444         | 36.5258         |                 |                  |                |                  | A    |           |                 |                  |                  |                |                  | 11 |
| 2 | <b>186.0873</b> | 93.5473         | <b>169.0608</b> | 85.0340          |                |                  | N    | 1263.7215 | 632.3644        | 1246.6949        | 623.8511         | 1245.7109      | 623.3591         | 10 |
| 3 | <b>317.1278</b> | 159.0675        | 300.1013        | 150.5543         |                |                  | M    | 1149.6786 | 575.3429        | 1132.6520        | <b>566.8296</b>  | 1131.6680      | 566.3376         | 9  |
| 4 | 464.1962        | 232.6017        | 447.1697        | 224.0885         |                |                  | F    | 1018.6381 | 509.8227        | <b>1001.6115</b> | <b>501.3094</b>  | 1000.6275      | 500.8174         | 8  |

|           |                 |                 |                  |                 |           |                 |          |                 |                 |                 |                 |          |          |          |
|-----------|-----------------|-----------------|------------------|-----------------|-----------|-----------------|----------|-----------------|-----------------|-----------------|-----------------|----------|----------|----------|
| <b>5</b>  | <b>620.2973</b> | 310.6523        | 603.2708         | 302.1390        |           |                 | <b>R</b> | <b>871.5697</b> | <b>436.2885</b> | 854.5431        | <b>427.7752</b> | 853.5591 | 427.2832 | <b>7</b> |
| <b>6</b>  | <b>707.3294</b> | 354.1683        | 690.3028         | 345.6550        | 689.3188  | 345.1630        | <b>S</b> | <b>715.4686</b> | 358.2379        | <b>698.4420</b> | 349.7246        | 697.4580 | 349.2326 | <b>6</b> |
| <b>7</b>  | <b>863.4305</b> | <b>432.2189</b> | <b>846.4039</b>  | <b>423.7056</b> | 845.4199  | 423.2136        | <b>R</b> | <b>628.4365</b> | 314.7219        | 611.4100        | 306.2086        |          |          | <b>5</b> |
| <b>8</b>  | <b>976.5145</b> | <b>488.7609</b> | <b>959.4880</b>  | 480.2476        | 958.5040  | 479.7556        | <b>L</b> | <b>472.3354</b> | 236.6713        | <b>455.3089</b> | 228.1581        |          |          | <b>4</b> |
| <b>9</b>  | 1132.6156       | <b>566.8115</b> | <b>1115.5891</b> | <b>558.2982</b> | 1114.6051 | <b>557.8062</b> | <b>R</b> | 359.2514        | 180.1293        | 342.2248        | 171.6160        |          |          | <b>3</b> |
| <b>10</b> | 1189.6371       | 595.3222        | 1172.6106        | 586.8089        | 1171.6265 | 586.3169        | <b>G</b> | <b>203.1502</b> | 102.0788        | <b>186.1237</b> | 93.5655         |          |          | <b>2</b> |
| <b>11</b> |                 |                 |                  |                 |           |                 | <b>K</b> | 146.1288        | 73.5680         | <b>129.1022</b> | 65.0548         |          |          | <b>1</b> |

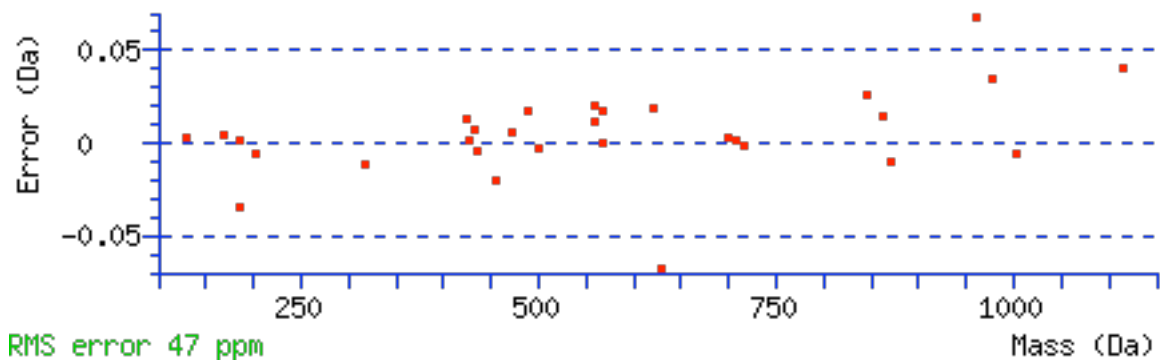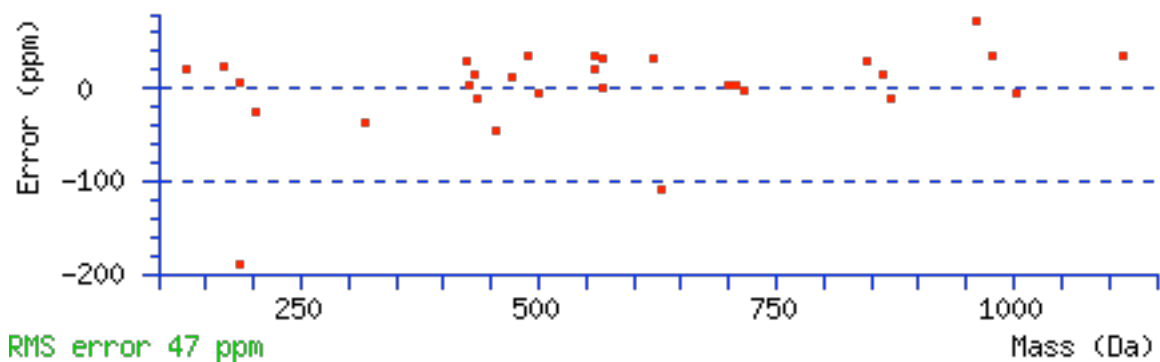

MS/MS Fragmentation of **DDPDAAEALVPGGDLSEE**

Found in **XP\_001188391**, PREDICTED: similar to arginine/serine-rich splicing factor 4 [Strongylocentrotus purpuratus].

Match to Query 726: 1798.805548 from(900.410050,2+) intensity(150588.0000)

Title: Cmpd 191, +MSn(900.8790), 31.4 min

Data file Qtof\_all.mgf

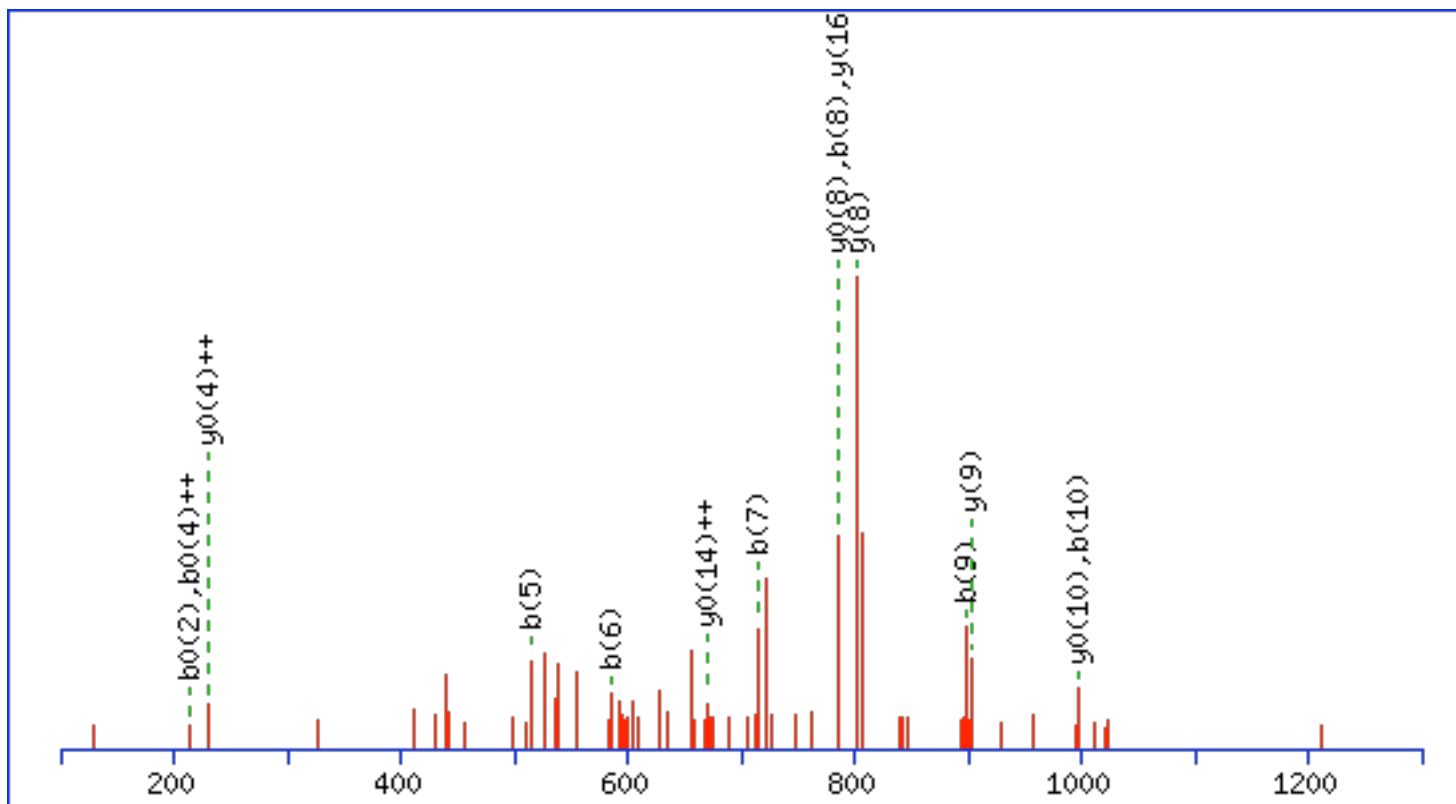

**Monoisotopic mass of neutral peptide Mr(calc): 1798.7745 Ions Score: 19 Expect: 92 Matches (Bold Red): 15/136**  
 fragment ions using 30 most intense peaks

| # | b        | b <sup>++</sup> | b <sup>0</sup>  | b <sup>0++</sup> | Seq. | y         | y <sup>++</sup> | y <sup>0</sup> | y <sup>0++</sup> | #  |
|---|----------|-----------------|-----------------|------------------|------|-----------|-----------------|----------------|------------------|----|
| 1 | 116.0342 | 58.5207         | 98.0237         | 49.5155          | D    |           |                 |                |                  | 18 |
| 2 | 231.0612 | 116.0342        | <b>213.0506</b> | 107.0289         | D    | 1684.7548 | 842.8810        | 1666.7443      | 833.8758         | 17 |
| 3 | 328.1139 | 164.5606        | 310.1034        | 155.5553         | P    | 1569.7279 | <b>785.3676</b> | 1551.7173      | 776.3623         | 16 |
| 4 | 443.1409 | 222.0741        | 425.1303        | <b>213.0688</b>  | D    | 1472.6751 | 736.8412        | 1454.6645      | 727.8359         | 15 |

|           |                 |          |           |          |          |                 |          |                 |                 |           |
|-----------|-----------------|----------|-----------|----------|----------|-----------------|----------|-----------------|-----------------|-----------|
| <b>5</b>  | <b>514.1780</b> | 257.5926 | 496.1674  | 248.5873 | <b>A</b> | 1357.6482       | 679.3277 | 1339.6376       | <b>670.3224</b> | <b>14</b> |
| <b>6</b>  | <b>585.2151</b> | 293.1112 | 567.2045  | 284.1059 | <b>A</b> | 1286.6111       | 643.8092 | 1268.6005       | 634.8039        | <b>13</b> |
| <b>7</b>  | <b>714.2577</b> | 357.6325 | 696.2471  | 348.6272 | <b>E</b> | 1215.5739       | 608.2906 | 1197.5634       | 599.2853        | <b>12</b> |
| <b>8</b>  | <b>785.2948</b> | 393.1510 | 767.2842  | 384.1458 | <b>A</b> | 1086.5313       | 543.7693 | 1068.5208       | 534.7640        | <b>11</b> |
| <b>9</b>  | <b>898.3789</b> | 449.6931 | 880.3683  | 440.6878 | <b>L</b> | 1015.4942       | 508.2508 | <b>997.4837</b> | 499.2455        | <b>10</b> |
| <b>10</b> | <b>997.4473</b> | 499.2273 | 979.4367  | 490.2220 | <b>V</b> | <b>902.4102</b> | 451.7087 | 884.3996        | 442.7034        | <b>9</b>  |
| <b>11</b> | 1094.5000       | 547.7537 | 1076.4895 | 538.7484 | <b>P</b> | <b>803.3418</b> | 402.1745 | <b>785.3312</b> | 393.1692        | <b>8</b>  |
| <b>12</b> | 1151.5215       | 576.2644 | 1133.5109 | 567.2591 | <b>G</b> | 706.2890        | 353.6481 | 688.2784        | 344.6429        | <b>7</b>  |
| <b>13</b> | 1208.5430       | 604.7751 | 1190.5324 | 595.7698 | <b>G</b> | 649.2675        | 325.1374 | 631.2570        | 316.1321        | <b>6</b>  |
| <b>14</b> | 1323.5699       | 662.2886 | 1305.5594 | 653.2833 | <b>D</b> | 592.2461        | 296.6267 | 574.2355        | 287.6214        | <b>5</b>  |
| <b>15</b> | 1436.6540       | 718.8306 | 1418.6434 | 709.8253 | <b>L</b> | 477.2191        | 239.1132 | 459.2086        | <b>230.1079</b> | <b>4</b>  |
| <b>16</b> | 1523.6860       | 762.3466 | 1505.6754 | 753.3414 | <b>S</b> | 364.1351        | 182.5712 | 346.1245        | 173.5659        | <b>3</b>  |
| <b>17</b> | 1652.7286       | 826.8679 | 1634.7180 | 817.8627 | <b>E</b> | 277.1030        | 139.0552 | 259.0925        | 130.0499        | <b>2</b>  |
| <b>18</b> |                 |          |           |          | <b>E</b> | 148.0604        | 74.5339  | 130.0499        | 65.5286         | <b>1</b>  |



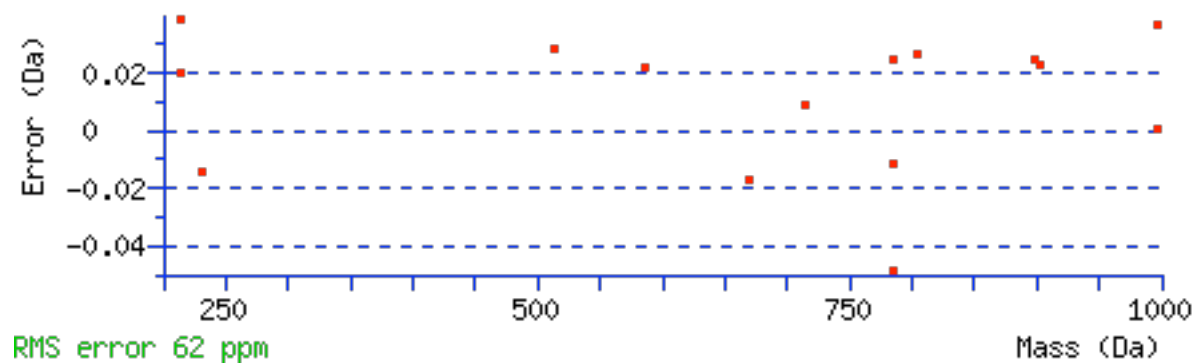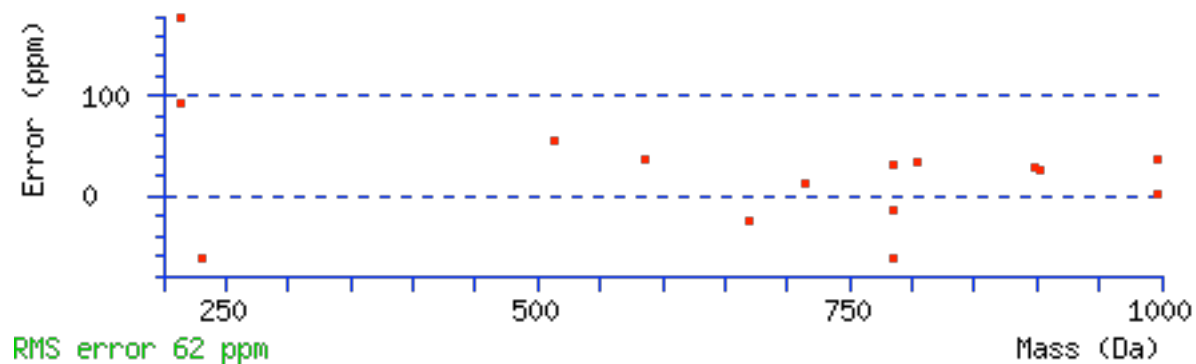

MS/MS Fragmentation of **DDPDAAEALVPGDLSEE**

Found in **XP\_001188391**, PREDICTED: similar to arginine/serine-rich splicing factor 4 [Strongylocentrotus purpuratus].

Match to Query 726: 1798.805548 from(900.410050,2+) intensity(150588.0000)

Title: Cmpd 191, +MSn(900.8790), 31.4 min

Data file Qtof\_all.mgf



**Monoisotopic mass of neutral peptide Mr(calc):** 1798.7745 **Ions Score:** 19 **Expect:** 92 **Matches (Bold Red):** 15/136  
 fragment ions using 30 most intense peaks

| # | b        | b <sup>++</sup> | b <sup>0</sup>  | b <sup>0++</sup> | Seq. | y         | y <sup>++</sup> | y <sup>0</sup> | y <sup>0++</sup> | #  |
|---|----------|-----------------|-----------------|------------------|------|-----------|-----------------|----------------|------------------|----|
| 1 | 116.0342 | 58.5207         | 98.0237         | 49.5155          | D    |           |                 |                |                  | 18 |
| 2 | 231.0612 | 116.0342        | <b>213.0506</b> | 107.0289         | D    | 1684.7548 | 842.8810        | 1666.7443      | 833.8758         | 17 |
| 3 | 328.1139 | 164.5606        | 310.1034        | 155.5553         | P    | 1569.7279 | <b>785.3676</b> | 1551.7173      | 776.3623         | 16 |
| 4 | 443.1409 | 222.0741        | 425.1303        | <b>213.0688</b>  | D    | 1472.6751 | 736.8412        | 1454.6645      | 727.8359         | 15 |

|           |                 |          |           |          |          |                 |          |                 |                 |           |
|-----------|-----------------|----------|-----------|----------|----------|-----------------|----------|-----------------|-----------------|-----------|
| <b>5</b>  | <b>514.1780</b> | 257.5926 | 496.1674  | 248.5873 | <b>A</b> | 1357.6482       | 679.3277 | 1339.6376       | <b>670.3224</b> | <b>14</b> |
| <b>6</b>  | <b>585.2151</b> | 293.1112 | 567.2045  | 284.1059 | <b>A</b> | 1286.6111       | 643.8092 | 1268.6005       | 634.8039        | <b>13</b> |
| <b>7</b>  | <b>714.2577</b> | 357.6325 | 696.2471  | 348.6272 | <b>E</b> | 1215.5739       | 608.2906 | 1197.5634       | 599.2853        | <b>12</b> |
| <b>8</b>  | <b>785.2948</b> | 393.1510 | 767.2842  | 384.1458 | <b>A</b> | 1086.5313       | 543.7693 | 1068.5208       | 534.7640        | <b>11</b> |
| <b>9</b>  | <b>898.3789</b> | 449.6931 | 880.3683  | 440.6878 | <b>L</b> | 1015.4942       | 508.2508 | <b>997.4837</b> | 499.2455        | <b>10</b> |
| <b>10</b> | <b>997.4473</b> | 499.2273 | 979.4367  | 490.2220 | <b>V</b> | <b>902.4102</b> | 451.7087 | 884.3996        | 442.7034        | <b>9</b>  |
| <b>11</b> | 1094.5000       | 547.7537 | 1076.4895 | 538.7484 | <b>P</b> | <b>803.3418</b> | 402.1745 | <b>785.3312</b> | 393.1692        | <b>8</b>  |
| <b>12</b> | 1151.5215       | 576.2644 | 1133.5109 | 567.2591 | <b>G</b> | 706.2890        | 353.6481 | 688.2784        | 344.6429        | <b>7</b>  |
| <b>13</b> | 1208.5430       | 604.7751 | 1190.5324 | 595.7698 | <b>G</b> | 649.2675        | 325.1374 | 631.2570        | 316.1321        | <b>6</b>  |
| <b>14</b> | 1323.5699       | 662.2886 | 1305.5594 | 653.2833 | <b>D</b> | 592.2461        | 296.6267 | 574.2355        | 287.6214        | <b>5</b>  |
| <b>15</b> | 1436.6540       | 718.8306 | 1418.6434 | 709.8253 | <b>L</b> | 477.2191        | 239.1132 | 459.2086        | <b>230.1079</b> | <b>4</b>  |
| <b>16</b> | 1523.6860       | 762.3466 | 1505.6754 | 753.3414 | <b>S</b> | 364.1351        | 182.5712 | 346.1245        | 173.5659        | <b>3</b>  |
| <b>17</b> | 1652.7286       | 826.8679 | 1634.7180 | 817.8627 | <b>E</b> | 277.1030        | 139.0552 | 259.0925        | 130.0499        | <b>2</b>  |
| <b>18</b> |                 |          |           |          | <b>E</b> | 148.0604        | 74.5339  | 130.0499        | 65.5286         | <b>1</b>  |

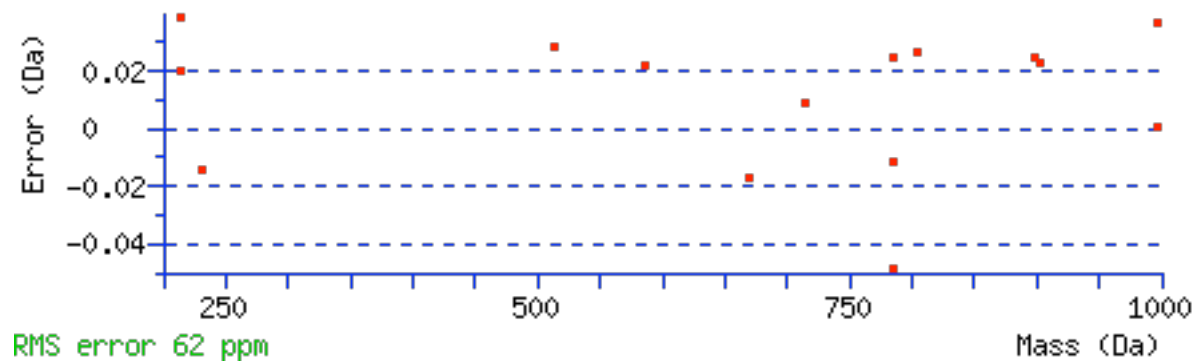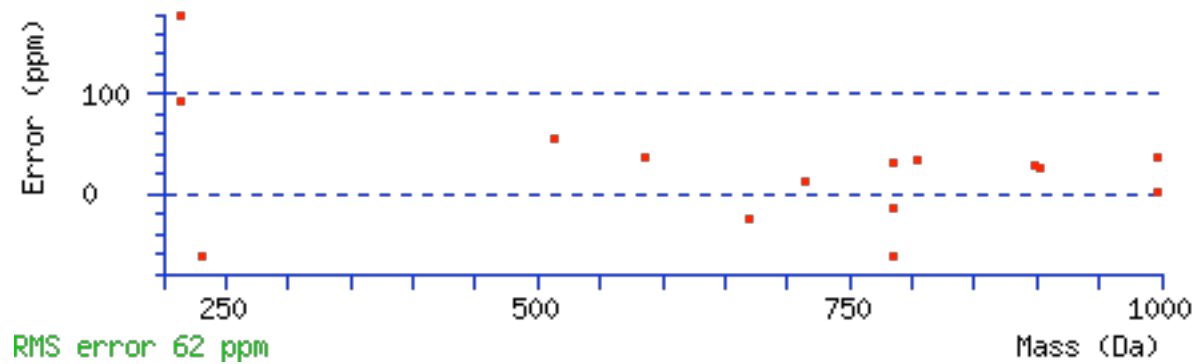

MS/MS Fragmentation of **DDPDAALVDEFMDEE**

Found in **XP\_001188391**, PREDICTED: similar to arginine/serine-rich splicing factor 4 [Strongylocentrotus purpuratus].

Match to Query 697: 1709.693008 from(855.853780,2+) intensity(235080.0000)

Title: Cmpd 242, +MSn(856.4203), 36.1 min

Data file Qtof\_all.mgf

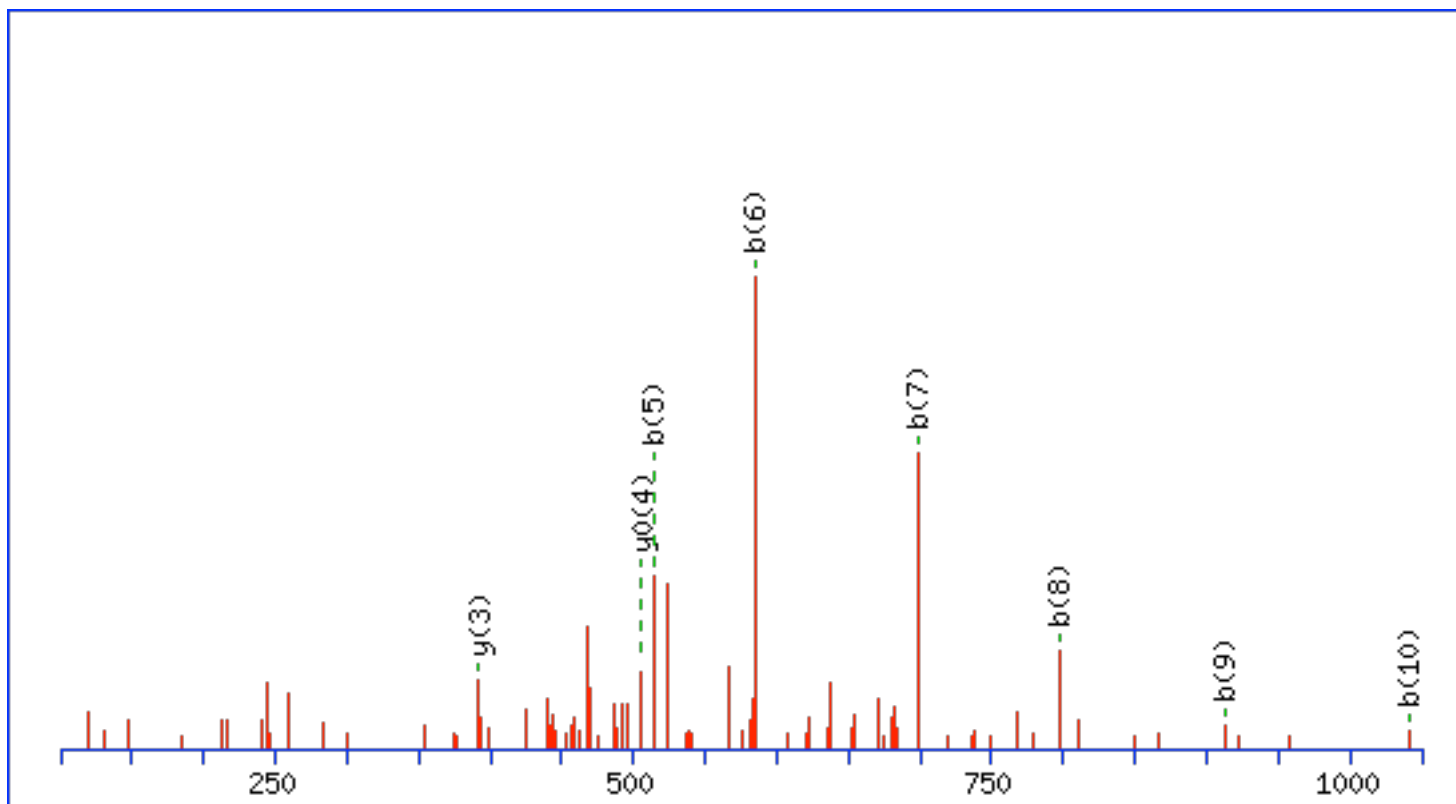

**Monoisotopic mass of neutral peptide Mr(calc): 1709.6614 Ions Score: 42 Expect: 0.23 Matches (Bold Red): 8/112**  
 fragment ions using 13 most intense peaks

| #        | b        | b <sup>++</sup> | b <sup>0</sup> | b <sup>0++</sup> | Seq.     | y         | y <sup>++</sup> | y <sup>0</sup> | y <sup>0++</sup> | #         |
|----------|----------|-----------------|----------------|------------------|----------|-----------|-----------------|----------------|------------------|-----------|
| <b>1</b> | 116.0342 | 58.5207         | 98.0237        | 49.5155          | <b>D</b> |           |                 |                |                  | <b>15</b> |
| <b>2</b> | 231.0612 | 116.0342        | 213.0506       | 107.0289         | <b>D</b> | 1595.6418 | 798.3245        | 1577.6312      | 789.3192         | <b>14</b> |
| <b>3</b> | 328.1139 | 164.5606        | 310.1034       | 155.5553         | <b>P</b> | 1480.6148 | 740.8110        | 1462.6043      | 731.8058         | <b>13</b> |
| <b>4</b> | 443.1409 | 222.0741        | 425.1303       | 213.0688         | <b>D</b> | 1383.5621 | 692.2847        | 1365.5515      | 683.2794         | <b>12</b> |

|    |                  |          |           |          |   |                 |          |                 |          |    |
|----|------------------|----------|-----------|----------|---|-----------------|----------|-----------------|----------|----|
| 5  | <b>514.1780</b>  | 257.5926 | 496.1674  | 248.5873 | A | 1268.5351       | 634.7712 | 1250.5245       | 625.7659 | 11 |
| 6  | <b>585.2151</b>  | 293.1112 | 567.2045  | 284.1059 | A | 1197.4980       | 599.2526 | 1179.4874       | 590.2474 | 10 |
| 7  | <b>698.2992</b>  | 349.6532 | 680.2886  | 340.6479 | L | 1126.4609       | 563.7341 | 1108.4503       | 554.7288 | 9  |
| 8  | <b>797.3676</b>  | 399.1874 | 779.3570  | 390.1821 | V | 1013.3768       | 507.1920 | 995.3663        | 498.1868 | 8  |
| 9  | <b>912.3945</b>  | 456.7009 | 894.3840  | 447.6956 | D | 914.3084        | 457.6578 | 896.2978        | 448.6526 | 7  |
| 10 | <b>1041.4371</b> | 521.2222 | 1023.4265 | 512.2169 | E | 799.2815        | 400.1444 | 781.2709        | 391.1391 | 6  |
| 11 | 1188.5055        | 594.7564 | 1170.4950 | 585.7511 | F | 670.2389        | 335.6231 | 652.2283        | 326.6178 | 5  |
| 12 | 1319.5460        | 660.2766 | 1301.5354 | 651.2714 | M | 523.1705        | 262.0889 | <b>505.1599</b> | 253.0836 | 4  |
| 13 | 1434.5730        | 717.7901 | 1416.5624 | 708.7848 | D | <b>392.1300</b> | 196.5686 | 374.1194        | 187.5633 | 3  |
| 14 | 1563.6155        | 782.3114 | 1545.6050 | 773.3061 | E | 277.1030        | 139.0552 | 259.0925        | 130.0499 | 2  |
| 15 |                  |          |           |          | E | 148.0604        | 74.5339  | 130.0499        | 65.5286  | 1  |

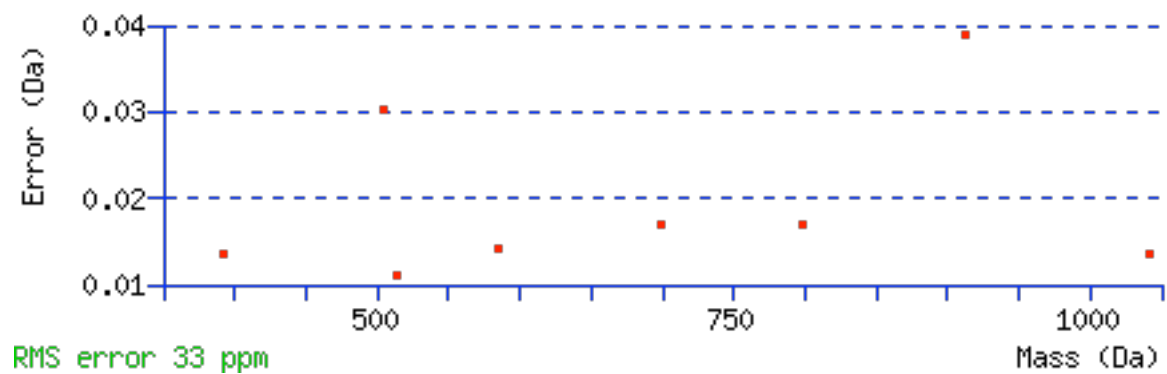

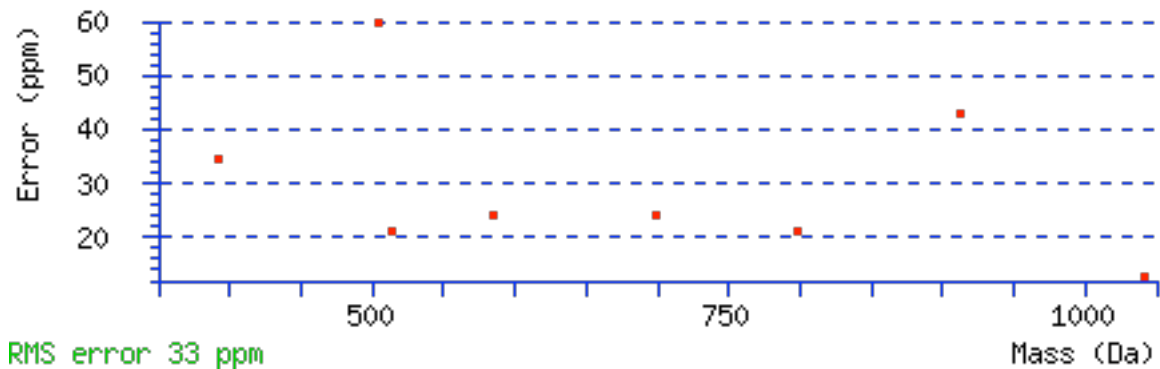

MS/MS Fragmentation of **QFVGGELIPSELP**

Found in **ABU55286**, GnRH-like tetrapeptide [Strongylocentrotus purpuratus].

Match to Query 521: 1367.616628 from(684.815590,2+) intensity(135132.0000)

Title: Cmpd 314, +MSn(685.2786), 42.8 min

Data file Qtof\_all.mgf

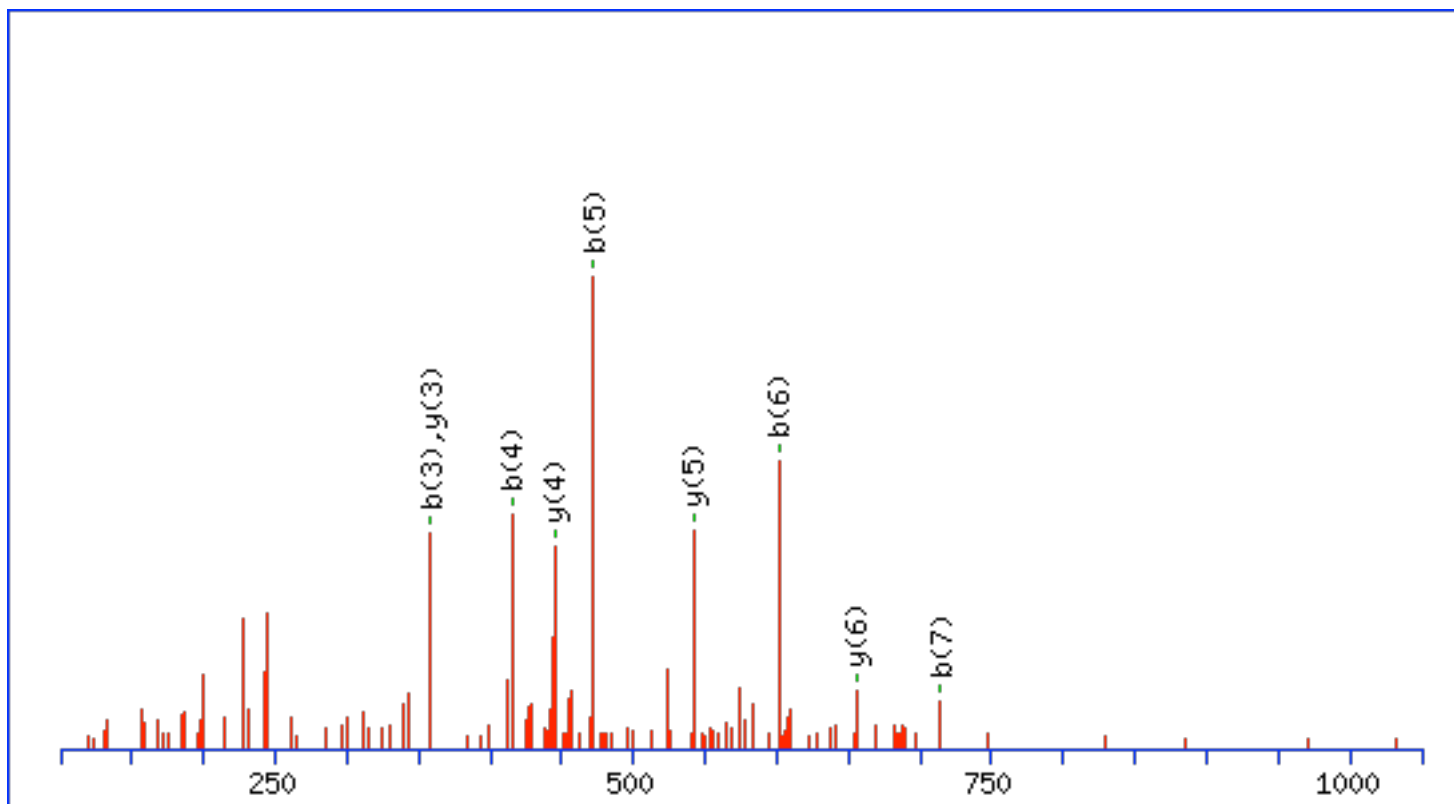

**Monoisotopic mass of neutral peptide Mr(calc):** 1367.6973 **Variable modifications:** N-term : Gln->pyro-Glu (N-term Q)  
**Ions Score:** 29 **Expect:** 12 **Matches (Bold Red):** 9/108 fragment ions using 17 most intense peaks

| # | b               | b <sup>++</sup> | b*       | b <sup>+++</sup> | b <sup>0</sup> | b <sup>0++</sup> | Seq. | y         | y <sup>++</sup> | y <sup>0</sup> | y <sup>0++</sup> | #  |
|---|-----------------|-----------------|----------|------------------|----------------|------------------|------|-----------|-----------------|----------------|------------------|----|
| 1 | 112.0393        | 56.5233         | 95.0128  | 48.0100          |                |                  | Q    |           |                 |                |                  | 13 |
| 2 | 259.1077        | 130.0575        | 242.0812 | 121.5442         |                |                  | F    | 1257.6725 | 629.3399        | 1239.6620      | 620.3346         | 12 |
| 3 | <b>358.1761</b> | 179.5917        | 341.1496 | 171.0784         |                |                  | V    | 1110.6041 | 555.8057        | 1092.5936      | 546.8004         | 11 |
| 4 | <b>415.1976</b> | 208.1024        | 398.1711 | 199.5892         |                |                  | G    | 1011.5357 | 506.2715        | 993.5251       | 497.2662         | 10 |



|           |                 |          |           |          |           |          |          |                 |          |          |          |          |
|-----------|-----------------|----------|-----------|----------|-----------|----------|----------|-----------------|----------|----------|----------|----------|
| <b>5</b>  | <b>472.2191</b> | 236.6132 | 455.1925  | 228.0999 |           |          | <b>G</b> | 954.5142        | 477.7608 | 936.5037 | 468.7555 | <b>9</b> |
| <b>6</b>  | <b>601.2617</b> | 301.1345 | 584.2351  | 292.6212 | 583.2511  | 292.1292 | <b>E</b> | 897.4928        | 449.2500 | 879.4822 | 440.2447 | <b>8</b> |
| <b>7</b>  | <b>714.3457</b> | 357.6765 | 697.3192  | 349.1632 | 696.3352  | 348.6712 | <b>L</b> | 768.4502        | 384.7287 | 750.4396 | 375.7234 | <b>7</b> |
| <b>8</b>  | 827.4298        | 414.2185 | 810.4032  | 405.7053 | 809.4192  | 405.2133 | <b>I</b> | <b>655.3661</b> | 328.1867 | 637.3556 | 319.1814 | <b>6</b> |
| <b>9</b>  | 924.4826        | 462.7449 | 907.4560  | 454.2316 | 906.4720  | 453.7396 | <b>P</b> | <b>542.2821</b> | 271.6447 | 524.2715 | 262.6394 | <b>5</b> |
| <b>10</b> | 1011.5146       | 506.2609 | 994.4880  | 497.7477 | 993.5040  | 497.2556 | <b>S</b> | <b>445.2293</b> | 223.1183 | 427.2187 | 214.1130 | <b>4</b> |
| <b>11</b> | 1108.5674       | 554.7873 | 1091.5408 | 546.2740 | 1090.5568 | 545.7820 | <b>P</b> | <b>358.1973</b> | 179.6023 | 340.1867 | 170.5970 | <b>3</b> |
| <b>12</b> | 1237.6099       | 619.3086 | 1220.5834 | 610.7953 | 1219.5994 | 610.3033 | <b>E</b> | 261.1445        | 131.0759 | 243.1339 | 122.0706 | <b>2</b> |
| <b>13</b> |                 |          |           |          |           |          | <b>L</b> | 132.1019        | 66.5546  |          |          | <b>1</b> |

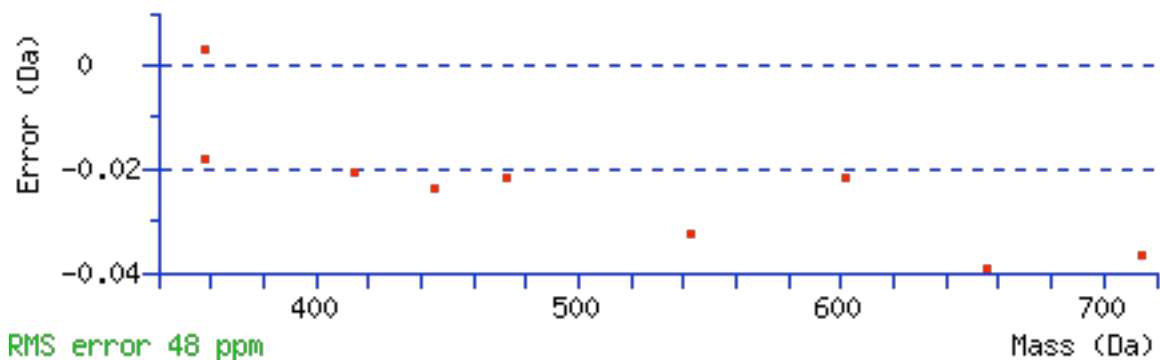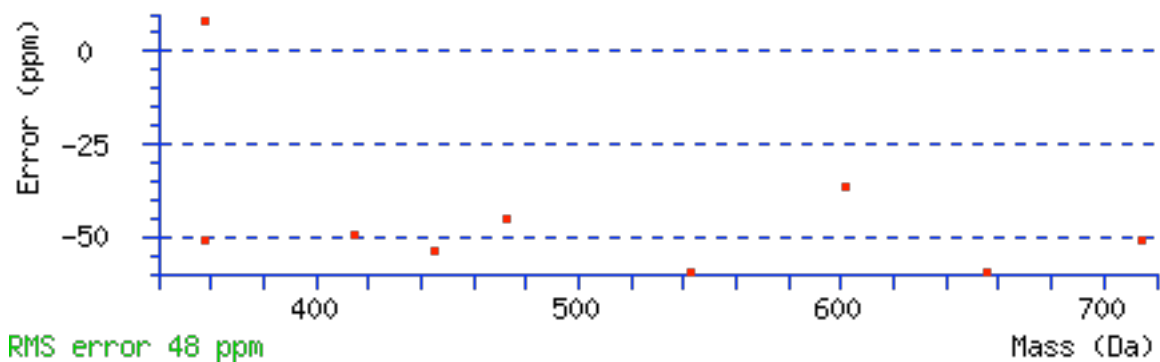

MS/MS Fragmentation of **SEDDQDLLPMEI**

Found in **ABU55286**, GnRH-like tetrapeptide [*Strongylocentrotus purpuratus*].

Match to Query 556: 1403.534888 from(702.774720,2+) intensity(44696.0000)

Title: Cmpd 262, +MSn(703.2881), 37.9 min

Data file Qtof\_all.mgf

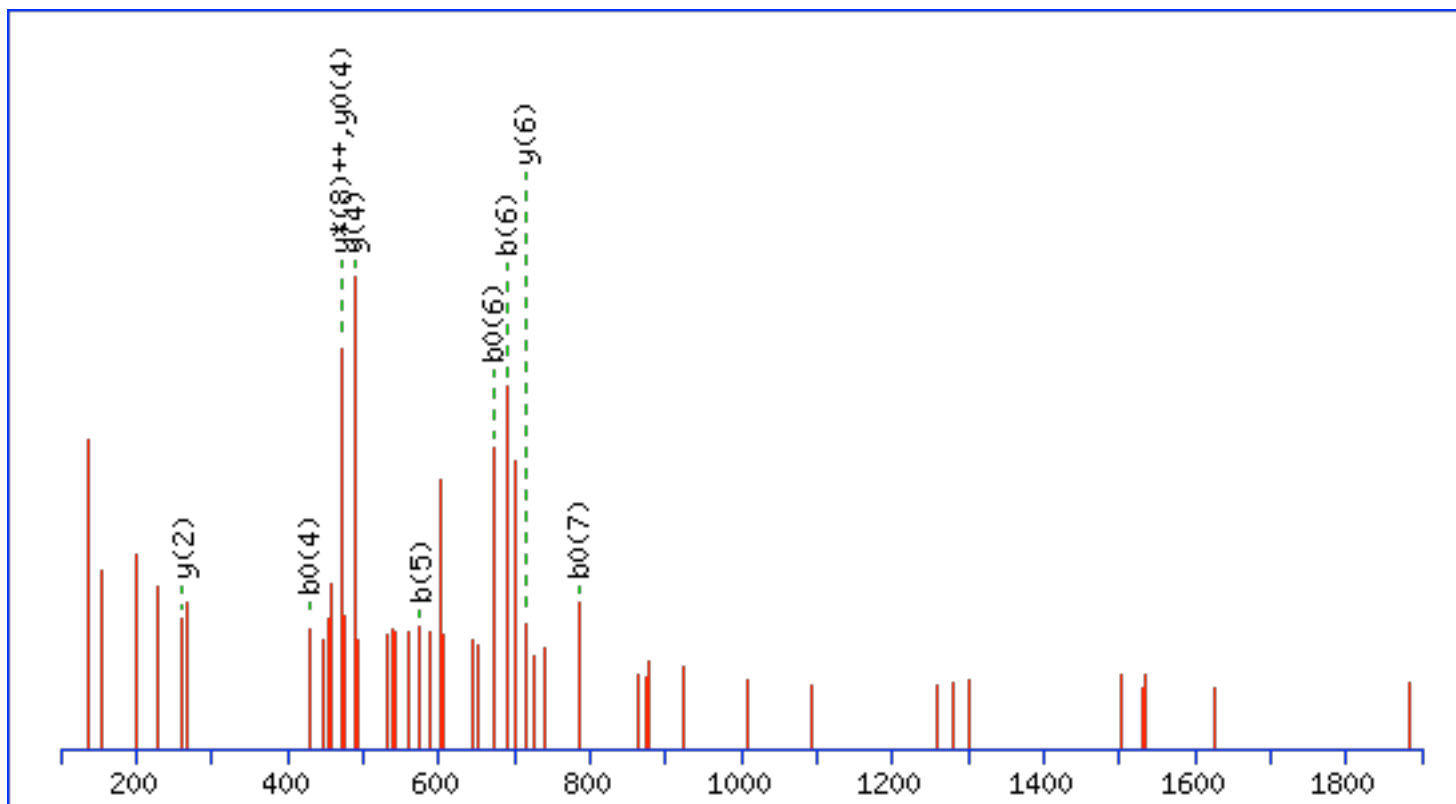

**Monoisotopic mass of neutral peptide Mr(calc): 1403.6126 Ions Score: 4 Expect: 1.1e+03 Matches (Bold Red): 10/108**  
 fragment ions using 28 most intense peaks

| #        | b        | b <sup>++</sup> | b <sup>*</sup> | b <sup>*++</sup> | b <sup>0</sup>  | b <sup>0++</sup> | Seq.     | y         | y <sup>++</sup> | y <sup>*</sup> | y <sup>*++</sup> | y <sup>0</sup> | y <sup>0++</sup> | #         |
|----------|----------|-----------------|----------------|------------------|-----------------|------------------|----------|-----------|-----------------|----------------|------------------|----------------|------------------|-----------|
| <b>1</b> | 88.0393  | 44.5233         |                |                  | 70.0287         | 35.5180          | <b>S</b> |           |                 |                |                  |                |                  | <b>12</b> |
| <b>2</b> | 217.0819 | 109.0446        |                |                  | 199.0713        | 100.0393         | <b>E</b> | 1317.5879 | 659.2976        | 1300.5613      | 650.7843         | 1299.5773      | 650.2923         | <b>11</b> |
| <b>3</b> | 332.1088 | 166.5581        |                |                  | 314.0983        | 157.5528         | <b>D</b> | 1188.5453 | 594.7763        | 1171.5187      | 586.2630         | 1170.5347      | 585.7710         | <b>10</b> |
| <b>4</b> | 447.1358 | 224.0715        |                |                  | <b>429.1252</b> | 215.0662         | <b>D</b> | 1073.5183 | 537.2628        | 1056.4918      | 528.7495         | 1055.5078      | 528.2575         | <b>9</b>  |

|           |                 |          |           |          |                 |          |          |                 |          |          |                 |                 |          |          |
|-----------|-----------------|----------|-----------|----------|-----------------|----------|----------|-----------------|----------|----------|-----------------|-----------------|----------|----------|
| <b>5</b>  | <b>575.1944</b> | 288.1008 | 558.1678  | 279.5875 | 557.1838        | 279.0955 | <b>Q</b> | 958.4914        | 479.7493 | 941.4648 | <b>471.2361</b> | 940.4808        | 470.7441 | <b>8</b> |
| <b>6</b>  | <b>690.2213</b> | 345.6143 | 673.1948  | 337.1010 | <b>672.2107</b> | 336.6090 | <b>D</b> | 830.4328        | 415.7200 |          |                 | 812.4223        | 406.7148 | <b>7</b> |
| <b>7</b>  | 803.3054        | 402.1563 | 786.2788  | 393.6430 | <b>785.2948</b> | 393.1510 | <b>L</b> | <b>715.4059</b> | 358.2066 |          |                 | 697.3953        | 349.2013 | <b>6</b> |
| <b>8</b>  | 916.3894        | 458.6984 | 899.3629  | 450.1851 | 898.3789        | 449.6931 | <b>L</b> | 602.3218        | 301.6645 |          |                 | 584.3112        | 292.6593 | <b>5</b> |
| <b>9</b>  | 1013.4422       | 507.2247 | 996.4156  | 498.7115 | 995.4316        | 498.2195 | <b>P</b> | <b>489.2377</b> | 245.1225 |          |                 | <b>471.2272</b> | 236.1172 | <b>4</b> |
| <b>10</b> | 1144.4827       | 572.7450 | 1127.4561 | 564.2317 | 1126.4721       | 563.7397 | <b>M</b> | 392.1850        | 196.5961 |          |                 | 374.1744        | 187.5908 | <b>3</b> |
| <b>11</b> | 1273.5253       | 637.2663 | 1256.4987 | 628.7530 | 1255.5147       | 628.2610 | <b>E</b> | <b>261.1445</b> | 131.0759 |          |                 | 243.1339        | 122.0706 | <b>2</b> |
| <b>12</b> |                 |          |           |          |                 |          | <b>I</b> | 132.1019        | 66.5546  |          |                 |                 |          | <b>1</b> |

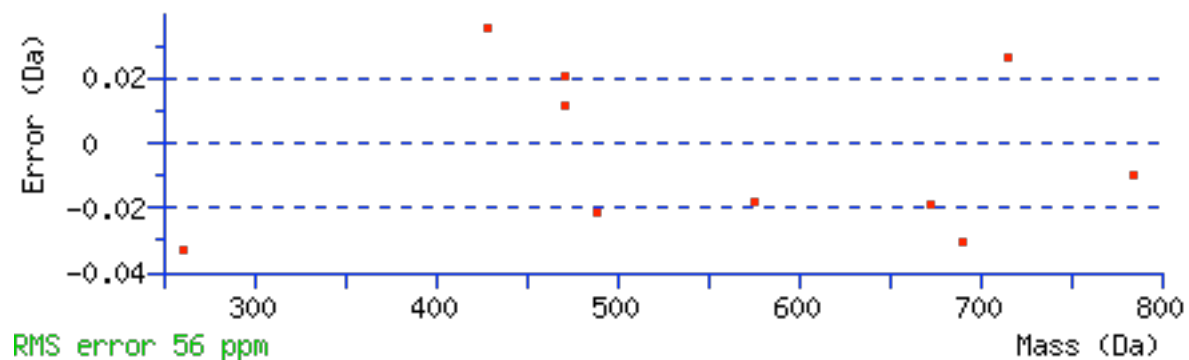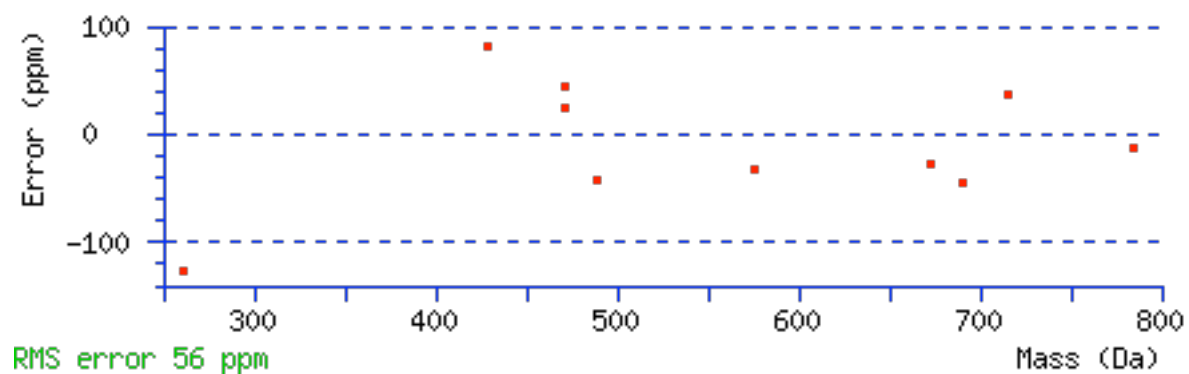

MS/MS Fragmentation of **QFVGGEALEQESNIN**

Found in **ABU55286**, GnRH-like tetrapeptide [*Strongylocentrotus purpuratus*].

Match to Query 686: 1616.764868 from(809.389710,2+) intensity(50776.0000)

Title: Cmpd 223, +MSn(809.8710), 34.4 min

Data file Qtof\_all.mgf

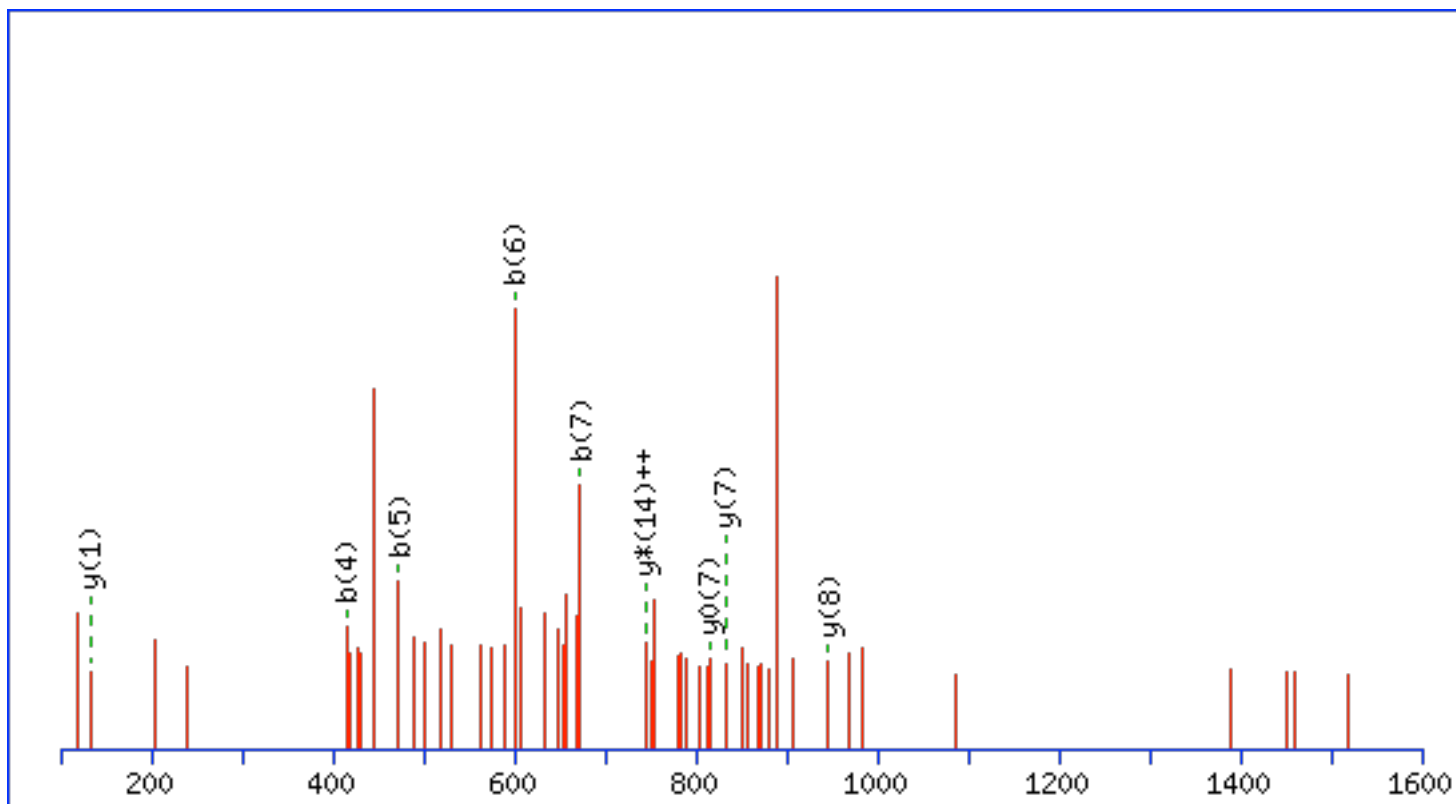

**Monoisotopic mass of neutral peptide Mr(calc):** 1616.7318 **Variable modifications:** N-term : Gln->pyro-Glu (N-term Q)  
**Ions Score:** 3 **Expect:** 5.5e+03 **Matches (Bold Red):** 9/152 fragment ions using 42 most intense peaks

| # | b               | b <sup>++</sup> | b <sup>*</sup> | b <sup>*++</sup> | b <sup>0</sup> | b <sup>0++</sup> | Seq. | y         | y <sup>++</sup> | y <sup>*</sup> | y <sup>*++</sup> | y <sup>0</sup> | y <sup>0++</sup> | #  |
|---|-----------------|-----------------|----------------|------------------|----------------|------------------|------|-----------|-----------------|----------------|------------------|----------------|------------------|----|
| 1 | 112.0393        | 56.5233         | 95.0128        | 48.0100          |                |                  | Q    |           |                 |                |                  |                |                  | 15 |
| 2 | 259.1077        | 130.0575        | 242.0812       | 121.5442         |                |                  | F    | 1506.7071 | 753.8572        | 1489.6805      | <b>745.3439</b>  | 1488.6965      | 744.8519         | 14 |
| 3 | 358.1761        | 179.5917        | 341.1496       | 171.0784         |                |                  | V    | 1359.6387 | 680.3230        | 1342.6121      | 671.8097         | 1341.6281      | 671.3177         | 13 |
| 4 | <b>415.1976</b> | 208.1024        | 398.1711       | 199.5892         |                |                  | G    | 1260.5702 | 630.7888        | 1243.5437      | 622.2755         | 1242.5597      | 621.7835         | 12 |

|           |                 |          |           |          |           |          |          |                 |          |           |          |                 |          |           |
|-----------|-----------------|----------|-----------|----------|-----------|----------|----------|-----------------|----------|-----------|----------|-----------------|----------|-----------|
| <b>5</b>  | <b>472.2191</b> | 236.6132 | 455.1925  | 228.0999 |           |          | <b>G</b> | 1203.5488       | 602.2780 | 1186.5222 | 593.7648 | 1185.5382       | 593.2727 | <b>11</b> |
| <b>6</b>  | <b>601.2617</b> | 301.1345 | 584.2351  | 292.6212 | 583.2511  | 292.1292 | <b>E</b> | 1146.5273       | 573.7673 | 1129.5008 | 565.2540 | 1128.5168       | 564.7620 | <b>10</b> |
| <b>7</b>  | <b>672.2988</b> | 336.6530 | 655.2722  | 328.1398 | 654.2882  | 327.6477 | <b>A</b> | 1017.4847       | 509.2460 | 1000.4582 | 500.7327 | 999.4742        | 500.2407 | <b>9</b>  |
| <b>8</b>  | 785.3828        | 393.1951 | 768.3563  | 384.6818 | 767.3723  | 384.1898 | <b>L</b> | <b>946.4476</b> | 473.7274 | 929.4211  | 465.2142 | 928.4370        | 464.7222 | <b>8</b>  |
| <b>9</b>  | 914.4254        | 457.7164 | 897.3989  | 449.2031 | 896.4149  | 448.7111 | <b>E</b> | <b>833.3636</b> | 417.1854 | 816.3370  | 408.6721 | <b>815.3530</b> | 408.1801 | <b>7</b>  |
| <b>10</b> | 1042.4840       | 521.7456 | 1025.4575 | 513.2324 | 1024.4735 | 512.7404 | <b>Q</b> | 704.3210        | 352.6641 | 687.2944  | 344.1508 | 686.3104        | 343.6588 | <b>6</b>  |
| <b>11</b> | 1171.5266       | 586.2669 | 1154.5001 | 577.7537 | 1153.5160 | 577.2617 | <b>E</b> | 576.2624        | 288.6348 | 559.2358  | 280.1216 | 558.2518        | 279.6295 | <b>5</b>  |
| <b>12</b> | 1258.5586       | 629.7830 | 1241.5321 | 621.2697 | 1240.5481 | 620.7777 | <b>S</b> | 447.2198        | 224.1135 | 430.1932  | 215.6003 | 429.2092        | 215.1082 | <b>4</b>  |
| <b>13</b> | 1372.6016       | 686.8044 | 1355.5750 | 678.2911 | 1354.5910 | 677.7991 | <b>N</b> | 360.1878        | 180.5975 | 343.1612  | 172.0842 |                 |          | <b>3</b>  |
| <b>14</b> | 1485.6856       | 743.3465 | 1468.6591 | 734.8332 | 1467.6751 | 734.3412 | <b>I</b> | 246.1448        | 123.5761 | 229.1183  | 115.0628 |                 |          | <b>2</b>  |
| <b>15</b> |                 |          |           |          |           |          | <b>N</b> | <b>133.0608</b> | 67.0340  | 116.0342  | 58.5207  |                 |          | <b>1</b>  |

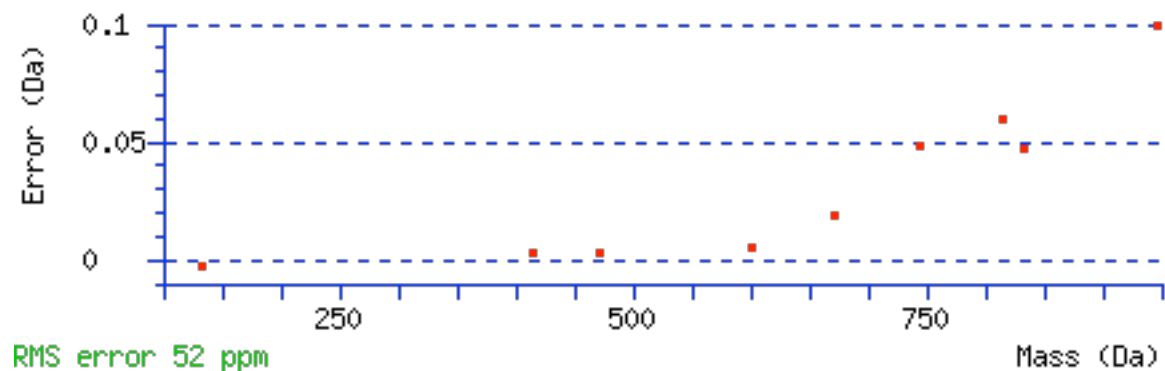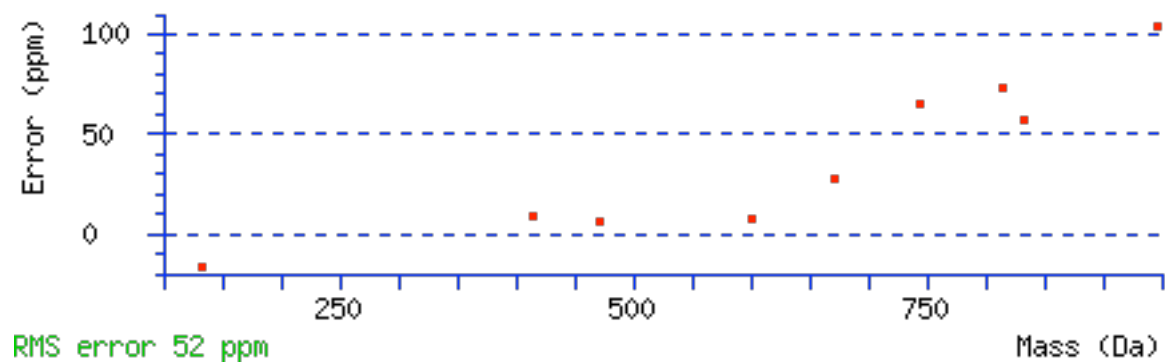

MS/MS Fragmentation of **TLPTKETIEQEKTA**

Found in **AAC26833**, thymosin beta [*Strongylocentrotus purpuratus*].

Match to Query 676: 1587.846888 from(794.930720,2+) intensity(228024.0000)

Title: Cmpd 102, +MSn(795.4395), 23.5 min

Data file Qtof\_all.mgf



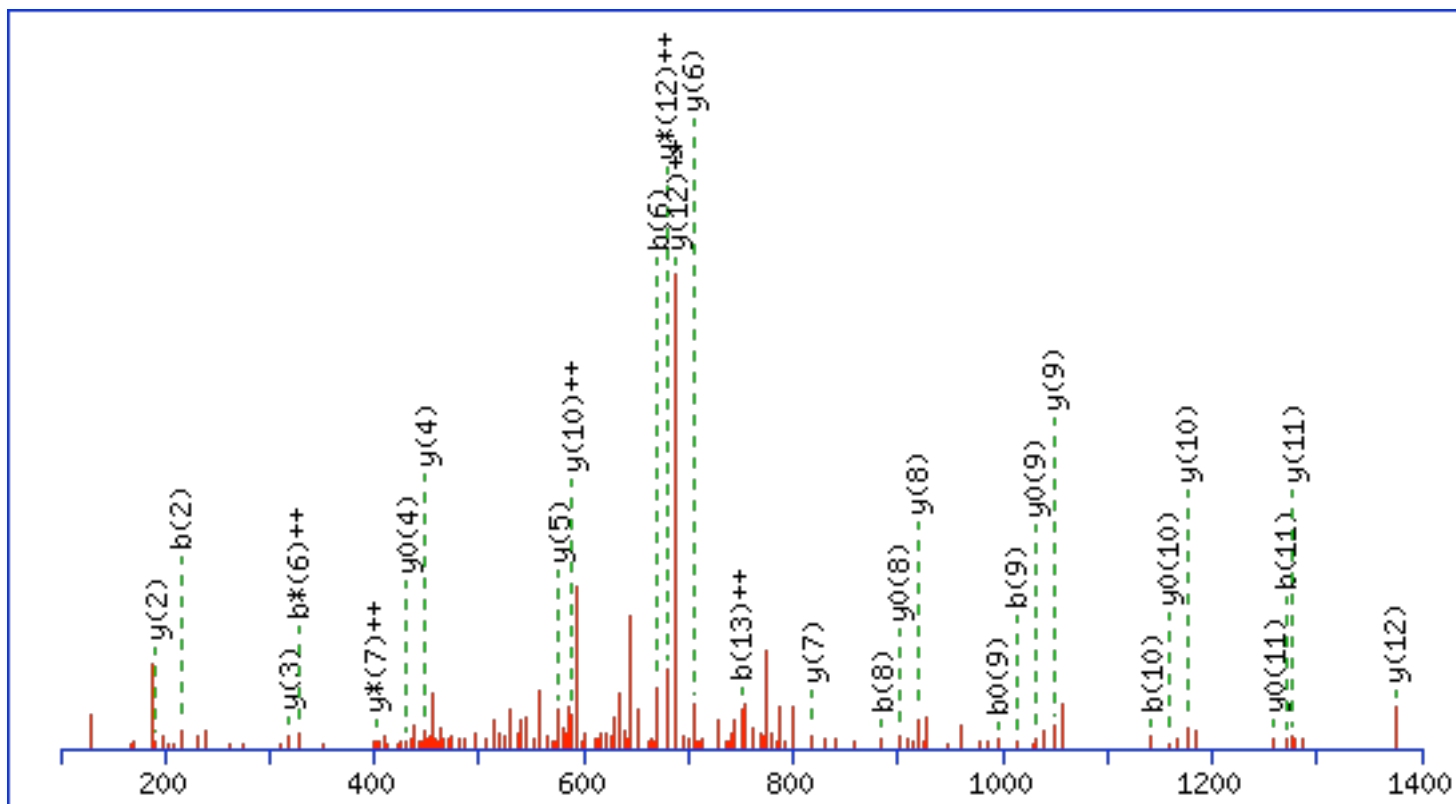

**Monoisotopic mass of neutral peptide Mr(calc): 1587.8355 Ions Score: 43 Expect: 0.68 Matches (Bold Red): 29/142**  
 fragment ions using 73 most intense peaks

| # | b               | b <sup>++</sup> | b <sup>*</sup> | b <sup>*++</sup> | b <sup>0</sup> | b <sup>0++</sup> | Seq. | y                | y <sup>++</sup> | y <sup>*</sup> | y <sup>*++</sup> | y <sup>0</sup>   | y <sup>0++</sup> | #  |
|---|-----------------|-----------------|----------------|------------------|----------------|------------------|------|------------------|-----------------|----------------|------------------|------------------|------------------|----|
| 1 | 102.0550        | 51.5311         |                |                  | 84.0444        | 42.5258          | T    |                  |                 |                |                  |                  |                  | 14 |
| 2 | <b>215.1390</b> | 108.0731        |                |                  | 197.1285       | 99.0679          | L    | 1487.7952        | 744.4012        | 1470.7686      | 735.8879         | 1469.7846        | 735.3959         | 13 |
| 3 | 312.1918        | 156.5995        |                |                  | 294.1812       | 147.5942         | P    | <b>1374.7111</b> | <b>687.8592</b> | 1357.6846      | <b>679.3459</b>  | 1356.7005        | 678.8539         | 12 |
| 4 | 413.2395        | 207.1234        |                |                  | 395.2289       | 198.1181         | T    | <b>1277.6583</b> | 639.3328        | 1260.6318      | 630.8195         | <b>1259.6478</b> | 630.3275         | 11 |

|           |                  |                 |           |                 |                 |          |          |                  |                 |           |                 |                  |          |           |
|-----------|------------------|-----------------|-----------|-----------------|-----------------|----------|----------|------------------|-----------------|-----------|-----------------|------------------|----------|-----------|
| <b>5</b>  | 541.3344         | 271.1709        | 524.3079  | 262.6576        | 523.3239        | 262.1656 | <b>K</b> | <b>1176.6107</b> | <b>588.8090</b> | 1159.5841 | 580.2957        | <b>1158.6001</b> | 579.8037 | <b>10</b> |
| <b>6</b>  | <b>670.3770</b>  | 335.6921        | 653.3505  | <b>327.1789</b> | 652.3665        | 326.6869 | <b>E</b> | <b>1048.5157</b> | 524.7615        | 1031.4891 | 516.2482        | <b>1030.5051</b> | 515.7562 | <b>9</b>  |
| <b>7</b>  | 771.4247         | 386.2160        | 754.3981  | 377.7027        | 753.4141        | 377.2107 | <b>T</b> | <b>919.4731</b>  | 460.2402        | 902.4466  | 451.7269        | <b>901.4625</b>  | 451.2349 | <b>8</b>  |
| <b>8</b>  | <b>884.5088</b>  | 442.7580        | 867.4822  | 434.2447        | 866.4982        | 433.7527 | <b>I</b> | <b>818.4254</b>  | 409.7164        | 801.3989  | <b>401.2031</b> | 800.4149         | 400.7111 | <b>7</b>  |
| <b>9</b>  | <b>1013.5514</b> | 507.2793        | 996.5248  | 498.7660        | <b>995.5408</b> | 498.2740 | <b>E</b> | <b>705.3414</b>  | 353.1743        | 688.3148  | 344.6610        | 687.3308         | 344.1690 | <b>6</b>  |
| <b>10</b> | <b>1141.6099</b> | 571.3086        | 1124.5834 | 562.7953        | 1123.5994       | 562.3033 | <b>Q</b> | <b>576.2988</b>  | 288.6530        | 559.2722  | 280.1397        | 558.2882         | 279.6477 | <b>5</b>  |
| <b>11</b> | <b>1270.6525</b> | 635.8299        | 1253.6260 | 627.3166        | 1252.6420       | 626.8246 | <b>E</b> | <b>448.2402</b>  | 224.6237        | 431.2136  | 216.1105        | <b>430.2296</b>  | 215.6185 | <b>4</b>  |
| <b>12</b> | 1398.7475        | 699.8774        | 1381.7209 | 691.3641        | 1380.7369       | 690.8721 | <b>K</b> | <b>319.1976</b>  | 160.1024        | 302.1710  | 151.5892        | 301.1870         | 151.0972 | <b>3</b>  |
| <b>13</b> | 1499.7952        | <b>750.4012</b> | 1482.7686 | 741.8879        | 1481.7846       | 741.3959 | <b>T</b> | <b>191.1026</b>  | 96.0550         |           |                 | 173.0921         | 87.0497  | <b>2</b>  |
| <b>14</b> |                  |                 |           |                 |                 |          | <b>A</b> | 90.0550          | 45.5311         |           |                 |                  |          | <b>1</b>  |

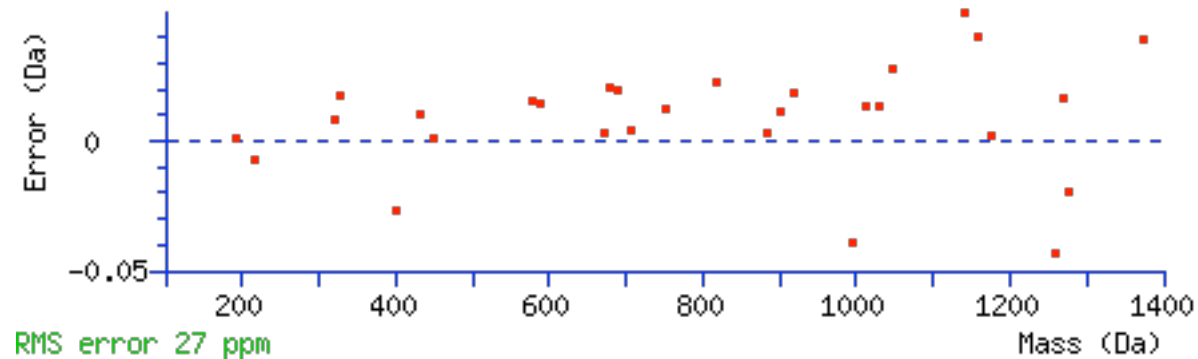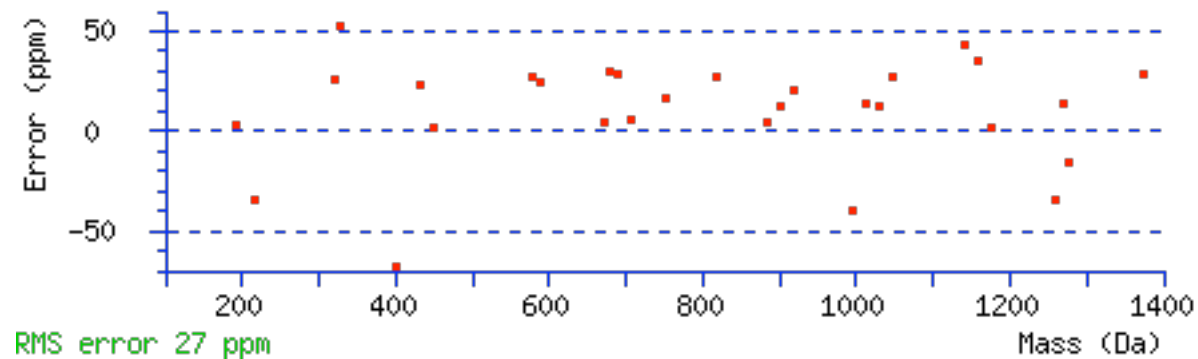

MS/MS Fragmentation of **APAPYFDEDAMDLMDPVFNFKDDSAV**  
Found in **XP\_001175484**, PREDICTED: hypothetical protein [Strongylocentrotus purpuratus].  
Match to Query 482: 2919.784872 from(974.268900,3+) intensity(255.5370)  
Data file Maldi\_All.mgf

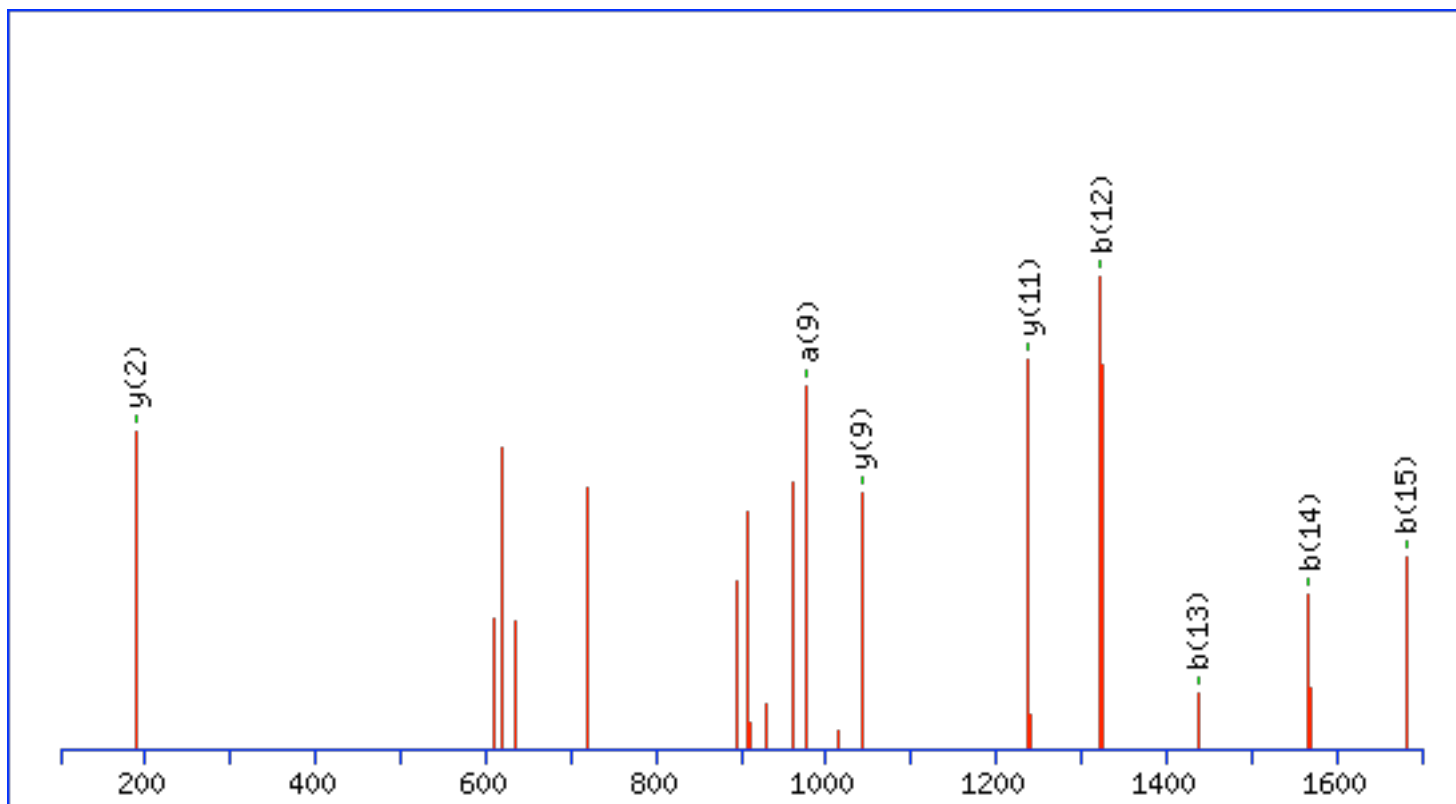

**Monoisotopic mass of neutral peptide Mr(calc): 2919.2619 Ions Score: 25 Expect: 62 Matches (Bold Red): 8/389**  
 fragment ions using 12 most intense peaks

| #        | Immon.  | a        | a* | a <sup>0</sup> | b        | b* | b <sup>0</sup> | Seq.     | y         | y*        | y <sup>0</sup> | #         |
|----------|---------|----------|----|----------------|----------|----|----------------|----------|-----------|-----------|----------------|-----------|
| <b>1</b> | 44.0495 | 44.0495  |    |                | 72.0444  |    |                | <b>A</b> |           |           |                | <b>26</b> |
| <b>2</b> | 70.0651 | 141.1022 |    |                | 169.0972 |    |                | <b>P</b> | 2849.2321 | 2832.2055 | 2831.2215      | <b>25</b> |
| <b>3</b> | 44.0495 | 212.1394 |    |                | 240.1343 |    |                | <b>A</b> | 2752.1793 | 2735.1528 | 2734.1687      | <b>24</b> |
| <b>4</b> | 70.0651 | 309.1921 |    |                | 337.1870 |    |                | <b>P</b> | 2681.1422 | 2664.1156 | 2663.1316      | <b>23</b> |

|            |           |           |            |           |           |             |           |           |           |           |           |    |
|------------|-----------|-----------|------------|-----------|-----------|-------------|-----------|-----------|-----------|-----------|-----------|----|
| 5          | 136.0757  | 472.2554  |            |           | 500.2504  |             |           | Y         | 2584.0894 | 2567.0629 | 2566.0789 | 22 |
| 6          | 120.0808  | 619.3239  |            |           | 647.3188  |             |           | F         | 2421.0261 | 2403.9996 | 2403.0155 | 21 |
| 7          | 88.0393   | 734.3508  |            | 716.3402  | 762.3457  |             | 744.3352  | D         | 2273.9577 | 2256.9311 | 2255.9471 | 20 |
| 8          | 102.0550  | 863.3934  |            | 845.3828  | 891.3883  |             | 873.3777  | E         | 2158.9307 | 2141.9042 | 2140.9202 | 19 |
| 9          | 88.0393   | 978.4203  |            | 960.4098  | 1006.4153 |             | 988.4047  | D         | 2029.8882 | 2012.8616 | 2011.8776 | 18 |
| 10         | 44.0495   | 1049.4575 |            | 1031.4469 | 1077.4524 |             | 1059.4418 | A         | 1914.8612 | 1897.8347 | 1896.8506 | 17 |
| 11         | 104.0528  | 1180.4979 |            | 1162.4874 | 1208.4929 |             | 1190.4823 | M         | 1843.8241 | 1826.7976 | 1825.8135 | 16 |
| 12         | 88.0393   | 1295.5249 |            | 1277.5143 | 1323.5198 |             | 1305.5092 | D         | 1712.7836 | 1695.7571 | 1694.7730 | 15 |
| 13         | 86.0964   | 1408.6089 |            | 1390.5984 | 1436.6039 |             | 1418.5933 | L         | 1597.7567 | 1580.7301 | 1579.7461 | 14 |
| 14         | 104.0528  | 1539.6494 |            | 1521.6389 | 1567.6443 |             | 1549.6338 | M         | 1484.6726 | 1467.6461 | 1466.6620 | 13 |
| 15         | 88.0393   | 1654.6764 |            | 1636.6658 | 1682.6713 |             | 1664.6607 | D         | 1353.6321 | 1336.6056 | 1335.6216 | 12 |
| 16         | 70.0651   | 1751.7291 |            | 1733.7186 | 1779.7241 |             | 1761.7135 | P         | 1238.6052 | 1221.5786 | 1220.5946 | 11 |
| 17         | 72.0808   | 1850.7976 |            | 1832.7870 | 1878.7925 |             | 1860.7819 | V         | 1141.5524 | 1124.5259 | 1123.5419 | 10 |
| 18         | 120.0808  | 1997.8660 |            | 1979.8554 | 2025.8609 |             | 2007.8503 | F         | 1042.4840 | 1025.4575 | 1024.4734 | 9  |
| 19         | 87.0553   | 2111.9089 | 2094.8823  | 2093.8983 | 2139.9038 | 2122.8773   | 2121.8932 | N         | 895.4156  | 878.3890  | 877.4050  | 8  |
| 20         | 120.0808  | 2258.9773 | 2241.9508  | 2240.9667 | 2286.9722 | 2269.9457   | 2268.9617 | F         | 781.3727  | 764.3461  | 763.3621  | 7  |
| 21         | 101.1073  | 2387.0723 | 2370.0457  | 2369.0617 | 2415.0672 | 2398.0406   | 2397.0566 | K         | 634.3042  | 617.2777  | 616.2937  | 6  |
| 22         | 88.0393   | 2502.0992 | 2485.0727  | 2484.0886 | 2530.0941 | 2513.0676   | 2512.0836 | D         | 506.2093  |           | 488.1987  | 5  |
| 23         | 88.0393   | 2617.1262 | 2600.0996  | 2599.1156 | 2645.1211 | 2628.0945   | 2627.1105 | D         | 391.1823  |           | 373.1718  | 4  |
| 24         | 60.0444   | 2704.1582 | 2687.1316  | 2686.1476 | 2732.1531 | 2715.1265   | 2714.1425 | S         | 276.1554  |           | 258.1448  | 3  |
| 25         | 44.0495   | 2775.1953 | 2758.1687  | 2757.1847 | 2803.1902 | 2786.1637   | 2785.1796 | A         | 189.1234  |           |           | 2  |
| 26         | 72.0808   |           |            |           |           |             |           | V         | 118.0863  |           |           | 1  |
| <b>Seq</b> | <b>ya</b> | <b>yb</b> | <b>Seq</b> | <b>ya</b> | <b>yb</b> | <b>Seq</b>  | <b>ya</b> | <b>yb</b> |           |           |           |    |
| <b>PA</b>  | 141.1022  | 169.0972  | <b>PAP</b> | 238.1550  | 266.1499  | <b>PAPY</b> | 401.2183  | 429.2132  |           |           |           |    |

|               |          |          |               |          |          |              |          |          |
|---------------|----------|----------|---------------|----------|----------|--------------|----------|----------|
| <b>PAPYF</b>  | 548.2867 | 576.2817 | <b>PAPYFD</b> | 663.3137 | 691.3086 | <b>AP</b>    | 141.1022 | 169.0972 |
| <b>APY</b>    | 304.1656 | 332.1605 | <b>APYF</b>   | 451.2340 | 479.2289 | <b>APYFD</b> | 566.2609 | 594.2558 |
| <b>APYFDE</b> | 695.3035 | 723.2984 | <b>PY</b>     | 233.1285 | 261.1234 | <b>PYF</b>   | 380.1969 | 408.1918 |
| <b>PYFD</b>   | 495.2238 | 523.2187 | <b>PYFDE</b>  | 624.2664 | 652.2613 | <b>YF</b>    | 283.1441 | 311.1390 |
| <b>YFD</b>    | 398.1710 | 426.1660 | <b>YFDE</b>   | 527.2136 | 555.2086 | <b>YFDED</b> | 642.2406 | 670.2355 |
| <b>FD</b>     | 235.1077 | 263.1026 | <b>FDE</b>    | 364.1503 | 392.1452 | <b>FDED</b>  | 479.1773 | 507.1722 |
| <b>FDEDA</b>  | 550.2144 | 578.2093 | <b>FDEDAM</b> | 681.2549 | 709.2498 | <b>DE</b>    | 217.0819 | 245.0768 |
| <b>DED</b>    | 332.1088 | 360.1038 | <b>DEDA</b>   | 403.1460 | 431.1409 | <b>DEDAM</b> | 534.1864 | 562.1814 |
| <b>DEDAMD</b> | 649.2134 | 677.2083 | <b>ED</b>     | 217.0819 | 245.0768 | <b>EDA</b>   | 288.1190 | 316.1139 |
| <b>EDAM</b>   | 419.1595 | 447.1544 | <b>EDAMD</b>  | 534.1864 | 562.1814 | <b>EDAMD</b> | 647.2705 | 675.2654 |
| <b>DA</b>     | 159.0764 | 187.0713 | <b>DAM</b>    | 290.1169 | 318.1118 | <b>DAMD</b>  | 405.1438 | 433.1388 |
| <b>DAMD</b>   | 518.2279 | 546.2228 | <b>DAMD</b>   | 649.2684 | 677.2633 | <b>AM</b>    | 175.0900 | 203.0849 |
| <b>AMD</b>    | 290.1169 | 318.1118 | <b>AMD</b>    | 403.2010 | 431.1959 | <b>AMD</b>   | 534.2415 | 562.2364 |
| <b>AMD</b>    | 649.2684 | 677.2633 | <b>MD</b>     | 219.0798 | 247.0747 | <b>MD</b>    | 332.1639 | 360.1588 |
| <b>MD</b>     | 463.2043 | 491.1993 | <b>MD</b>     | 578.2313 | 606.2262 | <b>MD</b>    | 675.2840 | 703.2790 |
| <b>DL</b>     | 201.1234 | 229.1183 | <b>DLM</b>    | 332.1639 | 360.1588 | <b>DLMD</b>  | 447.1908 | 475.1857 |
| <b>DLMD</b>   | 544.2436 | 572.2385 | <b>DLMD</b>   | 643.3120 | 671.3069 | <b>LM</b>    | 217.1369 | 245.1318 |
| <b>LMD</b>    | 332.1639 | 360.1588 | <b>LMD</b>    | 429.2166 | 457.2115 | <b>LMD</b>   | 528.2850 | 556.2799 |
| <b>LMD</b>    | 675.3534 | 703.3484 | <b>MD</b>     | 219.0798 | 247.0747 | <b>MD</b>    | 316.1326 | 344.1275 |
| <b>MD</b>     | 415.2010 | 443.1959 | <b>MD</b>     | 562.2694 | 590.2643 | <b>MD</b>    | 676.3123 | 704.3072 |
| <b>DP</b>     | 185.0921 | 213.0870 | <b>DP</b>     | 284.1605 | 312.1554 | <b>DP</b>    | 431.2289 | 459.2238 |
| <b>DP</b>     | 545.2718 | 573.2667 | <b>DP</b>     | 692.3402 | 720.3352 | <b>PV</b>    | 169.1335 | 197.1285 |
| <b>PVF</b>    | 316.2020 | 344.1969 | <b>PVF</b>    | 430.2449 | 458.2398 | <b>PVF</b>   | 577.3133 | 605.3082 |
| <b>VF</b>     | 219.1492 | 247.1441 | <b>VF</b>     | 333.1921 | 361.1870 | <b>VF</b>    | 480.2605 | 508.2554 |

|               |          |          |              |          |          |               |          |          |
|---------------|----------|----------|--------------|----------|----------|---------------|----------|----------|
| <b>VFNFK</b>  | 608.3555 | 636.3504 | <b>FN</b>    | 234.1237 | 262.1186 | <b>FNF</b>    | 381.1921 | 409.1870 |
| <b>FNFK</b>   | 509.2871 | 537.2820 | <b>FNFKD</b> | 624.3140 | 652.3089 | <b>NF</b>     | 234.1237 | 262.1186 |
| <b>NFK</b>    | 362.2187 | 390.2136 | <b>NFKD</b>  | 477.2456 | 505.2405 | <b>NFKDD</b>  | 592.2726 | 620.2675 |
| <b>NFKDDS</b> | 679.3046 | 707.2995 | <b>FK</b>    | 248.1757 | 276.1707 | <b>FKD</b>    | 363.2027 | 391.1976 |
| <b>FKDD</b>   | 478.2296 | 506.2245 | <b>FKDDS</b> | 565.2617 | 593.2566 | <b>FKDDSA</b> | 636.2988 | 664.2937 |
| <b>KD</b>     | 216.1343 | 244.1292 | <b>KDD</b>   | 331.1612 | 359.1561 | <b>KDDS</b>   | 418.1932 | 446.1882 |
| <b>KDDSA</b>  | 489.2304 | 517.2253 | <b>DD</b>    | 203.0662 | 231.0612 | <b>DDS</b>    | 290.0983 | 318.0932 |
| <b>DDSA</b>   | 361.1354 | 389.1303 | <b>DS</b>    | 175.0713 | 203.0662 | <b>DSA</b>    | 246.1084 | 274.1034 |
| <b>SA</b>     | 131.0815 | 159.0764 |              |          |          |               |          |          |

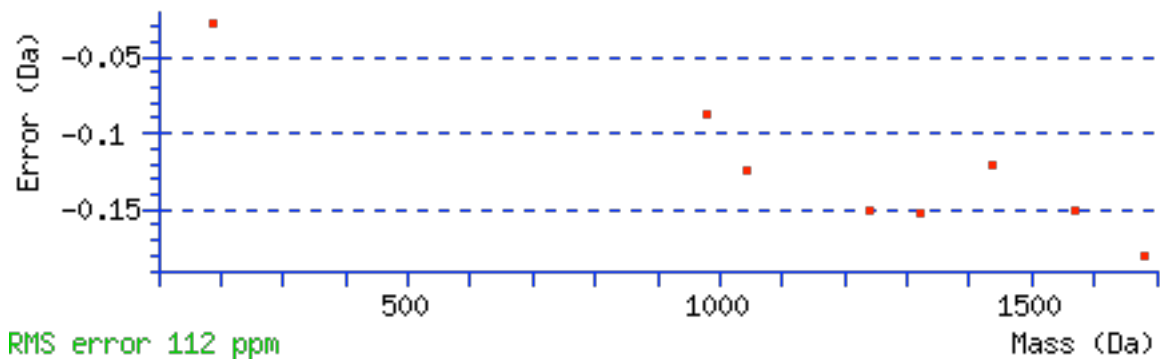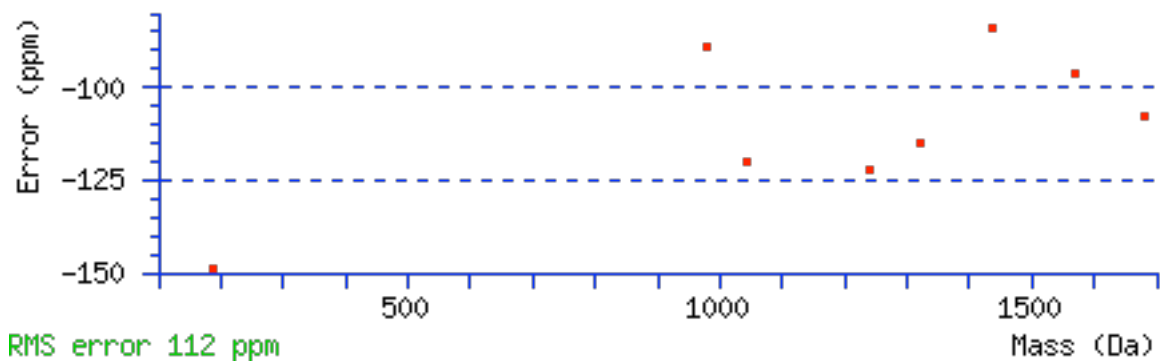

MS/MS Fragmentation of **PHGGSAFVF**

Found in **XP\_001186882**, PREDICTED: similar to LFRFa precursor [Strongylocentrotus purpuratus].

Match to Query 91: 916.281248 from(459.147900,2+) intensity(67.4726)

Data file Maldi\_All.mgf



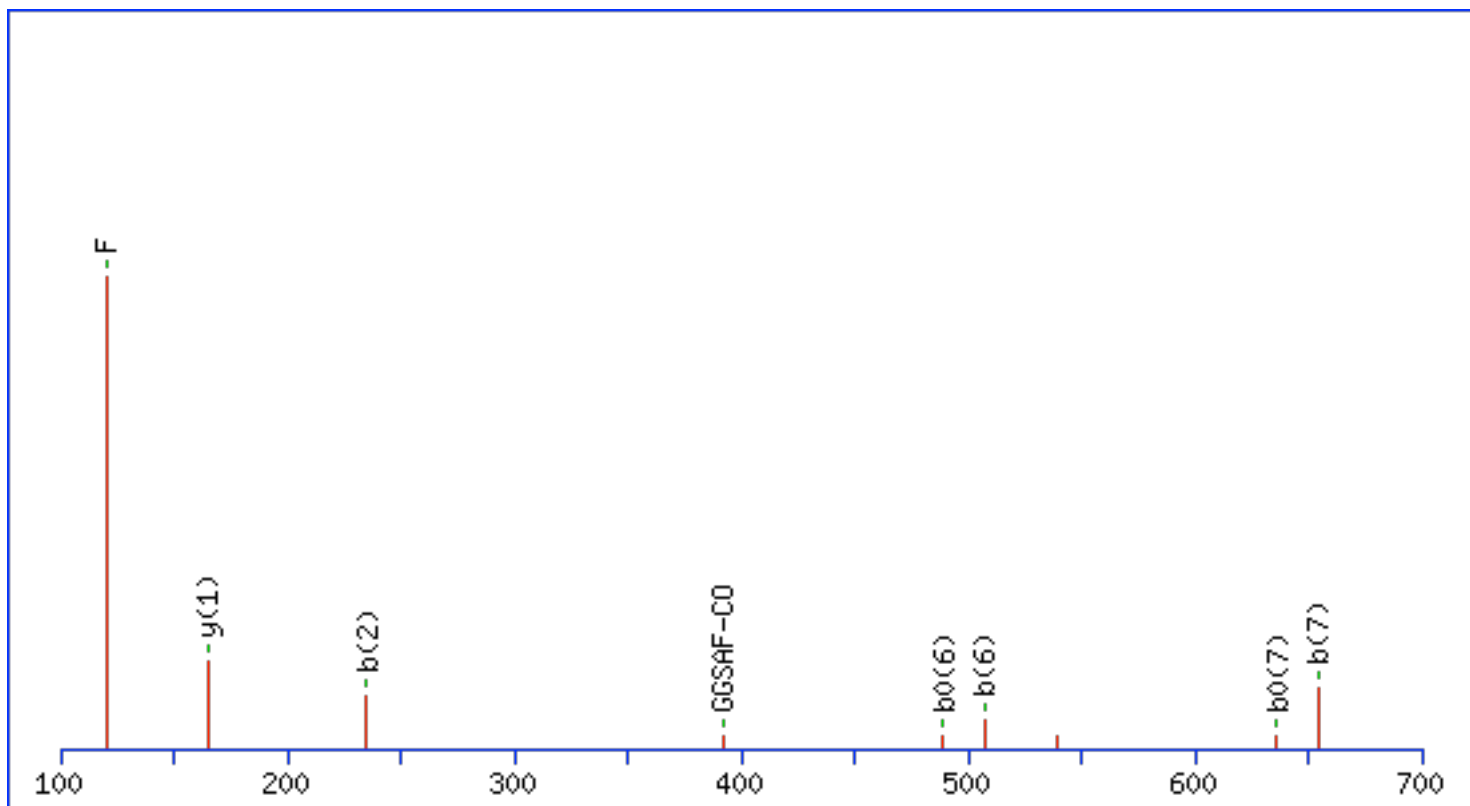

**Monoisotopic mass of neutral peptide Mr(calc):** 916.4556 **Variable modifications:** C-term : Amidated (C-term) **Ions Score:** 25 **Expect:** 59 **Matches (Bold Red):** 9/87 fragment ions using 9 most intense peaks

| # | Immon.   | a        | a <sup>0</sup> | b               | b <sup>0</sup> | Seq. | y        | y <sup>0</sup> | # |
|---|----------|----------|----------------|-----------------|----------------|------|----------|----------------|---|
| 1 | 70.0651  | 70.0651  |                | 98.0600         |                | P    |          |                | 9 |
| 2 | 110.0713 | 207.1240 |                | <b>235.1190</b> |                | H    | 820.4100 | 802.3995       | 8 |
| 3 | 30.0338  | 264.1455 |                | 292.1404        |                | G    | 683.3511 | 665.3406       | 7 |
| 4 | 30.0338  | 321.1670 |                | 349.1619        |                | G    | 626.3297 | 608.3191       | 6 |

|          |                 |          |          |                 |                 |          |                 |          |          |
|----------|-----------------|----------|----------|-----------------|-----------------|----------|-----------------|----------|----------|
| <b>5</b> | 60.0444         | 408.1990 | 390.1884 | 436.1939        | 418.1833        | <b>S</b> | 569.3082        | 551.2976 | <b>5</b> |
| <b>6</b> | 44.0495         | 479.2361 | 461.2255 | <b>507.2310</b> | <b>489.2205</b> | <b>A</b> | 482.2762        |          | <b>4</b> |
| <b>7</b> | <b>120.0808</b> | 626.3045 | 608.2940 | <b>654.2994</b> | <b>636.2889</b> | <b>F</b> | 411.2391        |          | <b>3</b> |
| <b>8</b> | 72.0808         | 725.3729 | 707.3624 | 753.3678        | 735.3573        | <b>V</b> | 264.1706        |          | <b>2</b> |
| <b>9</b> | <b>120.0808</b> |          |          |                 |                 | <b>F</b> | <b>165.1022</b> |          | <b>1</b> |

| <b>Seq</b>   | <b>ya</b>       | <b>yb</b> | <b>Seq</b>    | <b>ya</b> | <b>yb</b> | <b>Seq</b>    | <b>ya</b> | <b>yb</b> |
|--------------|-----------------|-----------|---------------|-----------|-----------|---------------|-----------|-----------|
| <b>HG</b>    | 167.0927        | 195.0877  | <b>HGG</b>    | 224.1142  | 252.1091  | <b>HGGS</b>   | 311.1462  | 339.1411  |
| <b>HGSA</b>  | 382.1833        | 410.1783  | <b>HGSAF</b>  | 529.2518  | 557.2467  | <b>HGSAFV</b> | 628.3202  | 656.3151  |
| <b>GG</b>    | 87.0553         | 115.0502  | <b>GGS</b>    | 174.0873  | 202.0822  | <b>GGSA</b>   | 245.1244  | 273.1193  |
| <b>GGSAF</b> | <b>392.1928</b> | 420.1878  | <b>GGSAFV</b> | 491.2613  | 519.2562  | <b>GS</b>     | 117.0659  | 145.0608  |
| <b>GSA</b>   | 188.1030        | 216.0979  | <b>GSAF</b>   | 335.1714  | 363.1663  | <b>GSAFV</b>  | 434.2398  | 462.2347  |
| <b>SA</b>    | 131.0815        | 159.0764  | <b>SAF</b>    | 278.1499  | 306.1448  | <b>SAFV</b>   | 377.2183  | 405.2132  |
| <b>AF</b>    | 191.1179        | 219.1128  | <b>AFV</b>    | 290.1863  | 318.1812  | <b>FV</b>     | 219.1492  | 247.1441  |

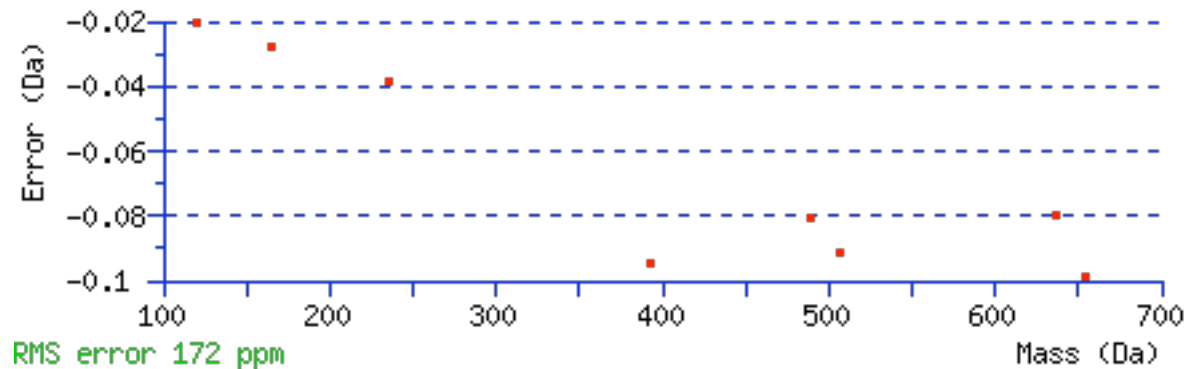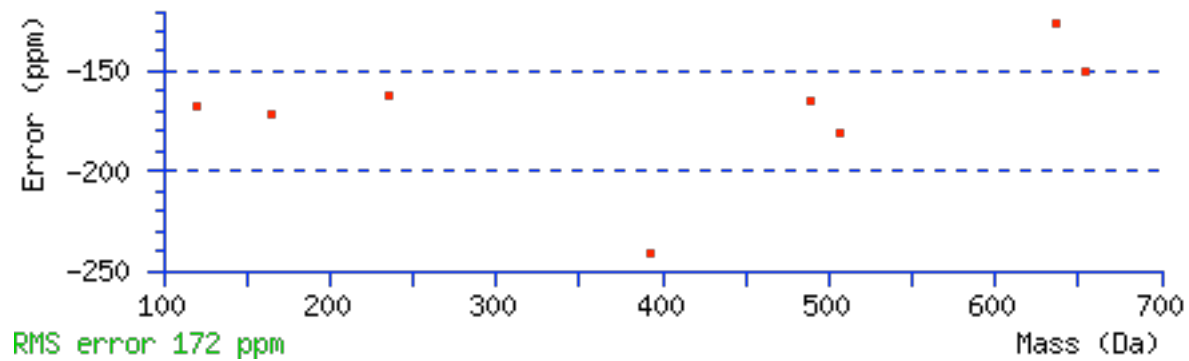

MS/MS Fragmentation of **DWAPREQDFANAAEESGPY**

Found in **XP\_001186882**, PREDICTED: similar to LFRFa precursor [Strongylocentrotus purpuratus].

Match to Query 374: 2151.598248 from(1076.806400,2+) intensity(1839.8896)

Data file Maldi\_All.mgf

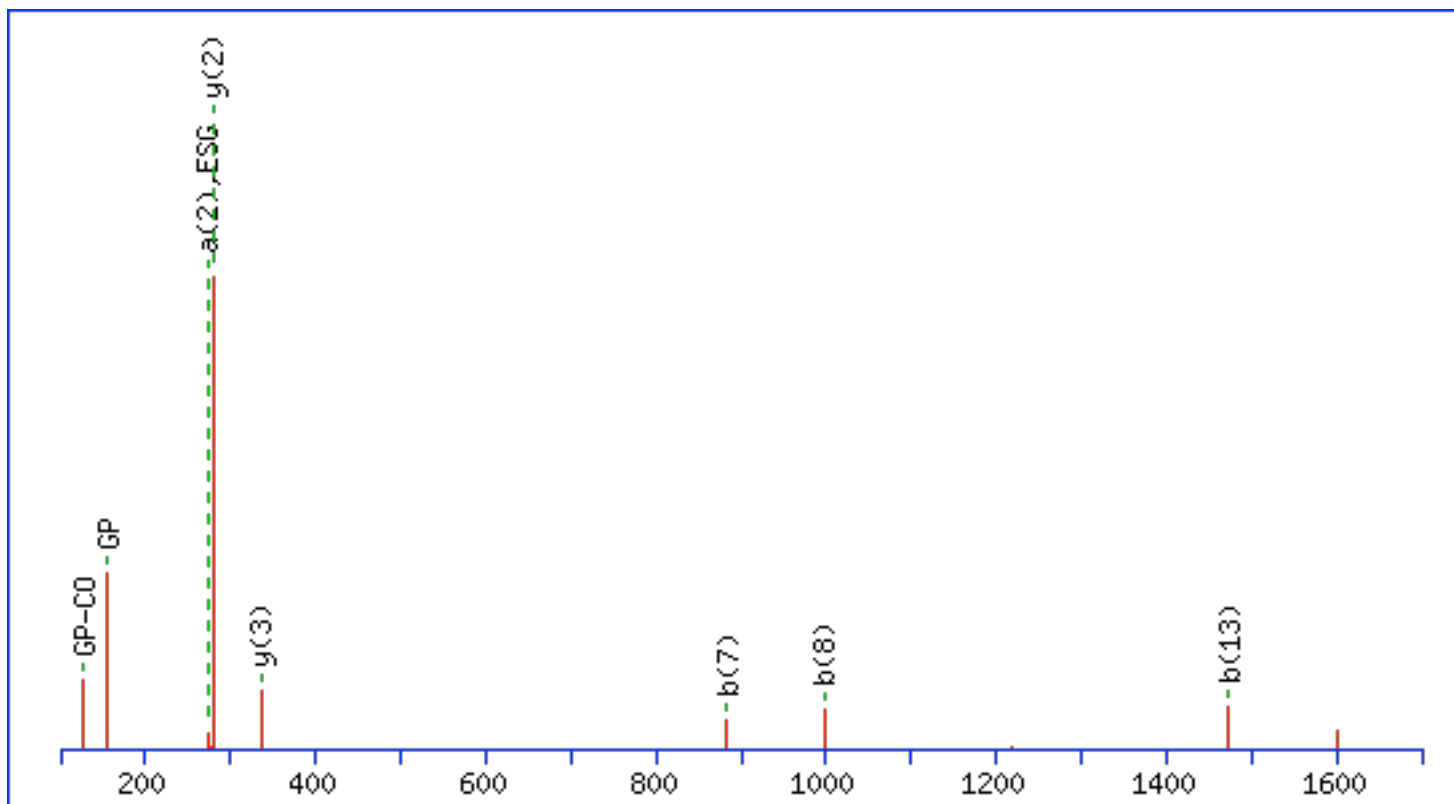

**Monoisotopic mass of neutral peptide Mr(calc): 2151.9133 Ions Score: 23 Expect: 1.3e+02 Matches (Bold Red): 9/318**  
 fragment ions using 10 most intense peaks

| # | Immon.   | a               | a* | a <sup>0</sup> | b        | b* | b <sup>0</sup> | d | Seq. | v         | w         | y         | y*        | y <sup>0</sup> | #  |
|---|----------|-----------------|----|----------------|----------|----|----------------|---|------|-----------|-----------|-----------|-----------|----------------|----|
| 1 | 88.0393  | 88.0393         |    | 70.0287        | 116.0342 |    | 98.0237        |   | D    |           |           |           |           |                | 19 |
| 2 | 159.0917 | <b>274.1186</b> |    | 256.1081       | 302.1135 |    | 284.1030       |   | W    | 1906.8202 |           | 2037.8937 | 2020.8672 | 2019.8831      | 18 |
| 3 | 44.0495  | 345.1557        |    | 327.1452       | 373.1506 |    | 355.1401       |   | A    | 1835.7831 |           | 1851.8144 | 1834.7878 | 1833.8038      | 17 |
| 4 | 70.0651  | 442.2085        |    | 424.1979       | 470.2034 |    | 452.1928       |   | P    | 1738.7303 | 1737.7351 | 1780.7773 | 1763.7507 | 1762.7667      | 16 |

|    |          |           |           |           |           |           |           |           |   |           |           |           |           |           |    |
|----|----------|-----------|-----------|-----------|-----------|-----------|-----------|-----------|---|-----------|-----------|-----------|-----------|-----------|----|
| 5  | 129.1135 | 598.3096  | 581.2831  | 580.2990  | 626.3045  | 609.2780  | 608.2940  | 513.2456  | R | 1582.6292 | 1581.6340 | 1683.7245 | 1666.6980 | 1665.7140 | 15 |
| 6  | 102.0550 | 727.3522  | 710.3256  | 709.3416  | 755.3471  | 738.3206  | 737.3365  | 669.3467  | E |           |           | 1527.6234 | 1510.5969 | 1509.6128 | 14 |
| 7  | 101.0709 | 855.4108  | 838.3842  | 837.4002  | 883.4057  | 866.3791  | 865.3951  | 798.3893  | Q |           |           | 1398.5808 | 1381.5543 | 1380.5703 | 13 |
| 8  | 88.0393  | 970.4377  | 953.4112  | 952.4272  | 998.4326  | 981.4061  | 980.4221  | 926.4479  | D |           |           | 1270.5222 | 1253.4957 | 1252.5117 | 12 |
| 9  | 120.0808 | 1117.5061 | 1100.4796 | 1099.4956 | 1145.5010 | 1128.4745 | 1127.4905 |           | F |           |           | 1155.4953 | 1138.4687 | 1137.4847 | 11 |
| 10 | 44.0495  | 1188.5432 | 1171.5167 | 1170.5327 | 1216.5382 | 1199.5116 | 1198.5276 |           | A |           |           | 1008.4269 | 991.4003  | 990.4163  | 10 |
| 11 | 87.0553  | 1302.5862 | 1285.5596 | 1284.5756 | 1330.5811 | 1313.5545 | 1312.5705 | 1259.5804 | N |           |           | 937.3898  | 920.3632  | 919.3792  | 9  |
| 12 | 44.0495  | 1373.6233 | 1356.5967 | 1355.6127 | 1401.6182 | 1384.5917 | 1383.6076 |           | A |           |           | 823.3468  |           | 805.3363  | 8  |
| 13 | 44.0495  | 1444.6604 | 1427.6339 | 1426.6498 | 1472.6553 | 1455.6288 | 1454.6448 |           | A |           |           | 752.3097  |           | 734.2992  | 7  |
| 14 | 102.0550 | 1573.7030 | 1556.6764 | 1555.6924 | 1601.6979 | 1584.6714 | 1583.6873 | 1515.6975 | E |           |           | 681.2726  |           | 663.2620  | 6  |
| 15 | 102.0550 | 1702.7456 | 1685.7190 | 1684.7350 | 1730.7405 | 1713.7140 | 1712.7299 | 1644.7401 | E |           |           | 552.2300  |           | 534.2195  | 5  |
| 16 | 60.0444  | 1789.7776 | 1772.7511 | 1771.7671 | 1817.7725 | 1800.7460 | 1799.7620 | 1773.7827 | S |           |           | 423.1874  |           | 405.1769  | 4  |
| 17 | 30.0338  | 1846.7991 | 1829.7725 | 1828.7885 | 1874.7940 | 1857.7674 | 1856.7834 |           | G |           |           | 336.1554  |           |           | 3  |
| 18 | 70.0651  | 1943.8518 | 1926.8253 | 1925.8413 | 1971.8468 | 1954.8202 | 1953.8362 | 1917.8362 | P |           |           | 279.1339  |           |           | 2  |
| 19 | 136.0757 |           |           |           |           |           |           |           | Y |           |           | 182.0812  |           |           | 1  |

| Seq    | ya       | yb       | Seq   | ya       | yb       | Seq    | ya       | yb       |
|--------|----------|----------|-------|----------|----------|--------|----------|----------|
| WA     | 230.1288 | 258.1237 | WAP   | 327.1816 | 355.1765 | WAPR   | 483.2827 | 511.2776 |
| WAPRE  | 612.3253 | 640.3202 | AP    | 141.1022 | 169.0972 | APR    | 297.2033 | 325.1983 |
| APRE   | 426.2459 | 454.2409 | APREQ | 554.3045 | 582.2994 | APREQD | 669.3315 | 697.3264 |
| PR     | 226.1662 | 254.1612 | PRE   | 355.2088 | 383.2037 | PREQ   | 483.2674 | 511.2623 |
| PREQD  | 598.2944 | 626.2893 | RE    | 258.1561 | 286.1510 | REQ    | 386.2146 | 414.2096 |
| REQD   | 501.2416 | 529.2365 | REQDF | 648.3100 | 676.3049 | EQ     | 230.1135 | 258.1084 |
| EQD    | 345.1405 | 373.1354 | EQDF  | 492.2089 | 520.2038 | EQDFA  | 563.2460 | 591.2409 |
| EQDFAN | 677.2889 | 705.2838 | QD    | 216.0979 | 244.0928 | QDF    | 363.1663 | 391.1612 |

|                |          |          |               |          |                 |                |                 |                 |
|----------------|----------|----------|---------------|----------|-----------------|----------------|-----------------|-----------------|
| <b>QDFA</b>    | 434.2034 | 462.1983 | <b>QDFAN</b>  | 548.2463 | 576.2413        | <b>QDFANA</b>  | 619.2835        | 647.2784        |
| <b>QDFANAA</b> | 690.3206 | 718.3155 | <b>DF</b>     | 235.1077 | 263.1026        | <b>DFA</b>     | 306.1448        | 334.1397        |
| <b>DFAN</b>    | 420.1878 | 448.1827 | <b>DFANA</b>  | 491.2249 | 519.2198        | <b>DFANAA</b>  | 562.2620        | 590.2569        |
| <b>DFANAAE</b> | 691.3046 | 719.2995 | <b>FA</b>     | 191.1179 | 219.1128        | <b>FAN</b>     | 305.1608        | 333.1557        |
| <b>FANA</b>    | 376.1979 | 404.1928 | <b>FANAA</b>  | 447.2350 | 475.2300        | <b>FANAAE</b>  | 576.2776        | 604.2726        |
| <b>AN</b>      | 158.0924 | 186.0873 | <b>ANA</b>    | 229.1295 | 257.1244        | <b>ANAA</b>    | 300.1666        | 328.1615        |
| <b>ANAAE</b>   | 429.2092 | 457.2041 | <b>ANAAE</b>  | 558.2518 | 586.2467        | <b>ANAAEES</b> | 645.2838        | 673.2788        |
| <b>NA</b>      | 158.0924 | 186.0873 | <b>NAA</b>    | 229.1295 | 257.1244        | <b>NAAE</b>    | 358.1721        | 386.1670        |
| <b>NAAEE</b>   | 487.2147 | 515.2096 | <b>NAAEES</b> | 574.2467 | 602.2416        | <b>NAAEESG</b> | 631.2682        | 659.2631        |
| <b>AA</b>      | 115.0866 | 143.0815 | <b>AAE</b>    | 244.1292 | 272.1241        | <b>AAEE</b>    | 373.1718        | 401.1667        |
| <b>AAEES</b>   | 460.2038 | 488.1987 | <b>AAEESG</b> | 517.2253 | 545.2202        | <b>AAEESGP</b> | 614.2780        | 642.2729        |
| <b>AE</b>      | 173.0921 | 201.0870 | <b>AEE</b>    | 302.1347 | 330.1296        | <b>AEES</b>    | 389.1667        | 417.1616        |
| <b>AEESG</b>   | 446.1882 | 474.1831 | <b>AEESGP</b> | 543.2409 | 571.2358        | <b>EE</b>      | 231.0975        | 259.0925        |
| <b>EES</b>     | 318.1296 | 346.1245 | <b>EESG</b>   | 375.1510 | 403.1460        | <b>EESGP</b>   | 472.2038        | 500.1987        |
| <b>ES</b>      | 189.0870 | 217.0819 | <b>ESG</b>    | 246.1084 | <b>274.1034</b> | <b>ESGP</b>    | 343.1612        | 371.1561        |
| <b>SG</b>      | 117.0659 | 145.0608 | <b>SGP</b>    | 214.1186 | 242.1135        | <b>GP</b>      | <b>127.0866</b> | <b>155.0815</b> |

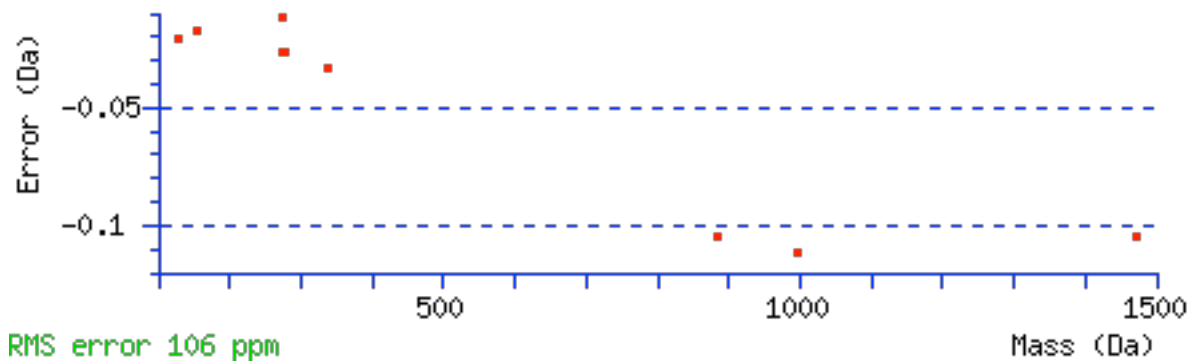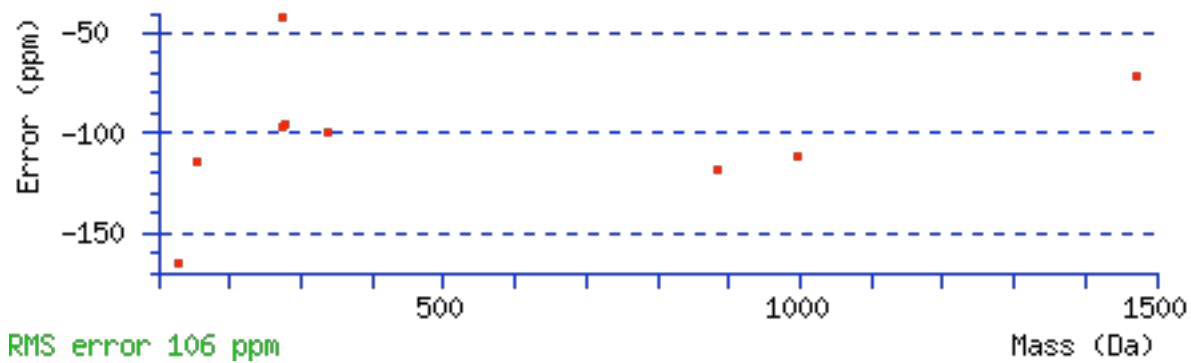

MS/MS Fragmentation of **GSTPEDIAELVSRN**  
Found in **New\_Precursor\_GSTPEDIA**, (3 exons, 112 aa), EST(BM322032)  
Match to Query 207: 1486.434448 from(744.224500,2+) intensity(183.7582)  
Data file Maldi\_All.mgf

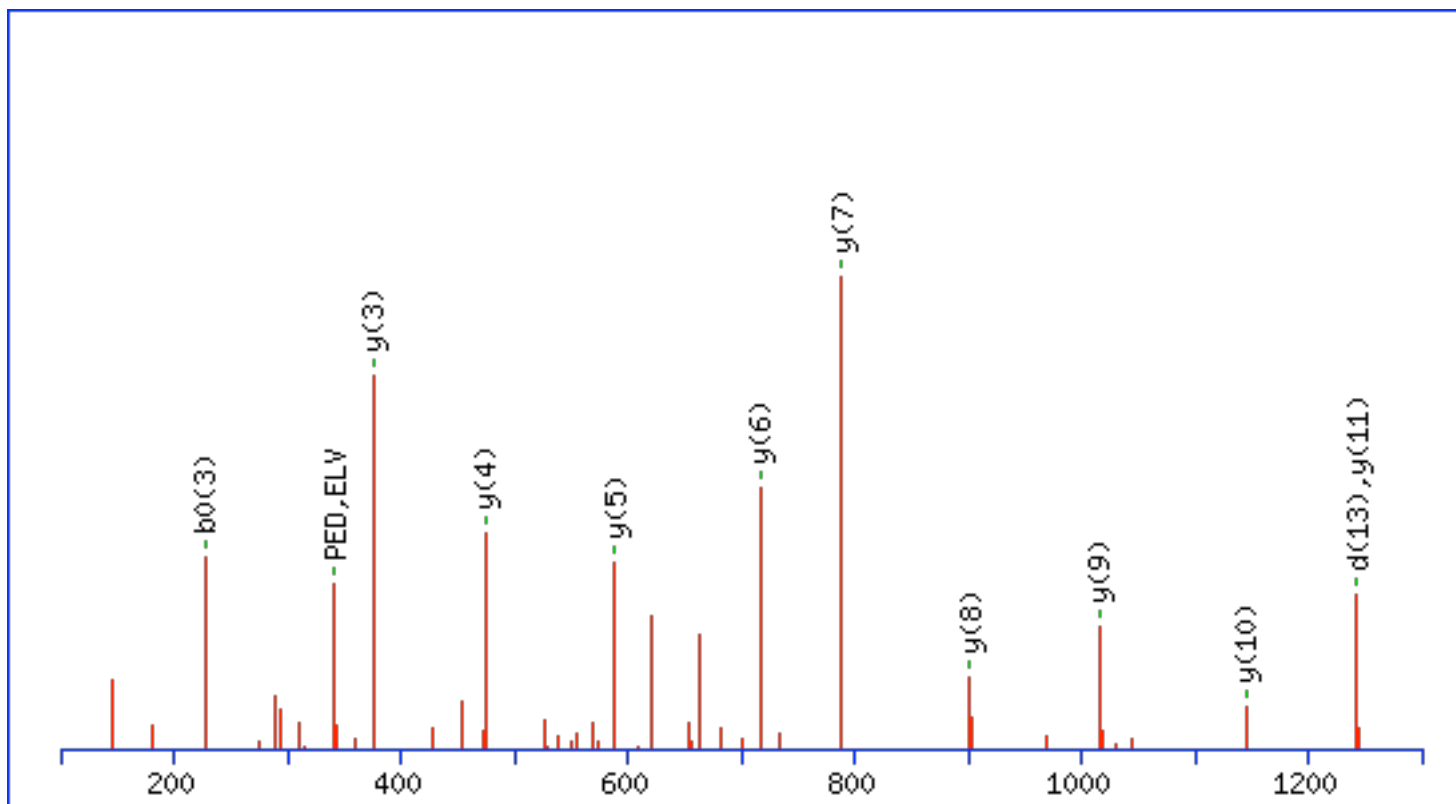

**Monoisotopic mass of neutral peptide Mr(calc):** 1486.7263 **Ions Score:** 92 **Expect:** 1.2e-05 **Matches (Bold Red):** 13/220 fragment ions using 11 most intense peaks

| #        | Immon.  | a        | a* | a <sup>0</sup> | b        | b* | b <sup>0</sup> | d | Seq      | v             | w             | w' | y             | y*            | y <sup>0</sup> | #         |
|----------|---------|----------|----|----------------|----------|----|----------------|---|----------|---------------|---------------|----|---------------|---------------|----------------|-----------|
| <b>1</b> | 30.0338 | 30.0338  |    |                | 58.0287  |    |                |   | <b>G</b> |               |               |    |               |               |                | <b>14</b> |
| <b>2</b> | 60.0444 | 117.0659 |    | 99.0553        | 145.0608 |    | 127.0502       |   | <b>S</b> | 1398.685<br>9 | 1397.690<br>7 |    | 1430.712<br>2 | 1413.685<br>6 | 1412.701<br>6  | <b>13</b> |



|           |              |               |               |               |               |               |                 |                             |          |               |               |               |                             |               |               |                      |
|-----------|--------------|---------------|---------------|---------------|---------------|---------------|-----------------|-----------------------------|----------|---------------|---------------|---------------|-----------------------------|---------------|---------------|----------------------|
| <b>3</b>  | 74.0600      | 218.1135      |               | 200.1030      | 246.1084      |               | <b>228.0979</b> |                             | <b>T</b> | 1297.638<br>3 | 1310.658<br>7 | 1312.637<br>9 | 1343.680<br>1               | 1326.653<br>6 | 1325.669<br>6 | <b>1</b><br><b>2</b> |
| <b>4</b>  | 70.0651      | 315.1663      |               | 297.1557      | 343.1612      |               | 325.1506        |                             | <b>P</b> | 1200.585<br>5 | 1199.590<br>3 |               | <b>1242.632</b><br><b>5</b> | 1225.605<br>9 | 1224.621<br>9 | <b>1</b><br><b>1</b> |
| <b>5</b>  | 102.055<br>0 | 444.2089      |               | 426.1983      | 472.2038      |               | 454.1932        |                             | <b>E</b> | 1071.542<br>9 | 1070.547<br>7 |               | <b>1145.579</b><br><b>7</b> | 1128.553<br>1 | 1127.569<br>1 | <b>1</b><br><b>0</b> |
| <b>6</b>  | 88.0393      | 559.2358      |               | 541.2253      | 587.2307      |               | 569.2202        |                             | <b>D</b> | 956.5160      | 955.5207      |               | <b>1016.537</b><br><b>1</b> | 999.5105      | 998.5265      | <b>9</b>             |
| <b>7</b>  | 86.0964      | 672.3199      |               | 654.3093      | 700.3148      |               | 682.3042        |                             | <b>I</b> | 843.4319      | 856.4523      | 870.4680      | <b>901.5102</b>             | 884.4836      | 883.4996      | <b>8</b>             |
| <b>8</b>  | 44.0495      | 743.3570      |               | 725.3464      | 771.3519      |               | 753.3414        |                             | <b>A</b> | 772.3948      |               |               | <b>788.4261</b>             | 771.3995      | 770.4155      | <b>7</b>             |
| <b>9</b>  | 102.055<br>0 | 872.3996      |               | 854.3890      | 900.3945      |               | 882.3840        |                             | <b>E</b> | 643.3522      | 642.3570      |               | <b>717.3890</b>             | 700.3624      | 699.3784      | <b>6</b>             |
| <b>10</b> | 86.0964      | 985.4837      |               | 967.4731      | 1013.478<br>6 |               | 995.4680        |                             | <b>L</b> | 530.2681      | 529.2729      |               | <b>588.3464</b>             | 571.3198      | 570.3358      | <b>5</b>             |
| <b>11</b> | 72.0808      | 1084.552<br>1 |               | 1066.541<br>5 | 1112.547<br>0 |               | 1094.536<br>4   |                             | <b>V</b> | 431.1997      | 444.2201      |               | <b>475.2623</b>             | 458.2358      | 457.2518      | <b>4</b>             |
| <b>12</b> | 60.0444      | 1171.584<br>1 |               | 1153.573<br>5 | 1199.579<br>0 |               | 1181.568<br>5   |                             | <b>S</b> | 344.1677      | 343.1724      |               | <b>376.1939</b>             | 359.1674      | 358.1833      | <b>3</b>             |
| <b>13</b> | 129.113<br>5 | 1327.685<br>2 | 1310.658<br>7 | 1309.674<br>7 | 1355.680<br>1 | 1338.653<br>6 | 1337.669<br>6   | <b>1242.621</b><br><b>2</b> | <b>R</b> | 188.0666      | 187.0713      |               | 289.1619                    | 272.1353      |               | <b>2</b>             |
| <b>14</b> | 87.0553      |               |               |               |               |               |                 |                             | <b>N</b> |               |               |               | 133.0608                    | 116.0342      |               | <b>1</b>             |

| Seq          | ya       | yb       | Seq           | ya       | yb       | Seq            | ya       | yb       |
|--------------|----------|----------|---------------|----------|----------|----------------|----------|----------|
| <b>ST</b>    | 161.0921 | 189.0870 | <b>STP</b>    | 258.1448 | 286.1397 | <b>STPE</b>    | 387.1874 | 415.1823 |
| <b>STPED</b> | 502.2144 | 530.2093 | <b>STPEDI</b> | 615.2984 | 643.2933 | <b>STPEDIA</b> | 686.3355 | 714.3305 |
| <b>TP</b>    | 171.1128 | 199.1077 | <b>TPE</b>    | 300.1554 | 328.1503 | <b>TPED</b>    | 415.1823 | 443.1773 |
| <b>TPEDI</b> | 528.2664 | 556.2613 | <b>TPEDIA</b> | 599.3035 | 627.2984 | <b>PE</b>      | 199.1077 | 227.1026 |

|               |          |                 |               |          |                 |               |          |          |
|---------------|----------|-----------------|---------------|----------|-----------------|---------------|----------|----------|
| <b>PED</b>    | 314.1347 | <b>342.1296</b> | <b>PEDI</b>   | 427.2187 | 455.2136        | <b>PEDIA</b>  | 498.2558 | 526.2508 |
| <b>PEDIAE</b> | 627.2984 | 655.2933        | <b>ED</b>     | 217.0819 | 245.0768        | <b>EDI</b>    | 330.1660 | 358.1609 |
| <b>EDIA</b>   | 401.2031 | 429.1980        | <b>EDIAE</b>  | 530.2457 | 558.2406        | <b>EDIAEL</b> | 643.3297 | 671.3246 |
| <b>DI</b>     | 201.1234 | 229.1183        | <b>DIA</b>    | 272.1605 | 300.1554        | <b>DIAE</b>   | 401.2031 | 429.1980 |
| <b>DIAEL</b>  | 514.2871 | 542.2821        | <b>DIAELV</b> | 613.3556 | 641.3505        | <b>IA</b>     | 157.1335 | 185.1285 |
| <b>IAE</b>    | 286.1761 | 314.1710        | <b>IAEL</b>   | 399.2602 | 427.2551        | <b>IAELV</b>  | 498.3286 | 526.3235 |
| <b>IAELVS</b> | 585.3606 | 613.3556        | <b>AE</b>     | 173.0921 | 201.0870        | <b>AEL</b>    | 286.1761 | 314.1710 |
| <b>AELV</b>   | 385.2445 | 413.2395        | <b>AELVS</b>  | 472.2766 | 500.2715        | <b>AELVSR</b> | 628.3777 | 656.3726 |
| <b>EL</b>     | 215.1390 | 243.1339        | <b>ELV</b>    | 314.2074 | <b>342.2023</b> | <b>ELVS</b>   | 401.2395 | 429.2344 |
| <b>ELVSR</b>  | 557.3406 | 585.3355        | <b>LV</b>     | 185.1648 | 213.1598        | <b>LVS</b>    | 272.1969 | 300.1918 |
| <b>LVSR</b>   | 428.2980 | 456.2929        | <b>VS</b>     | 159.1128 | 187.1077        | <b>VSR</b>    | 315.2139 | 343.2088 |
| <b>SR</b>     | 216.1455 | 244.1404        |               |          |                 |               |          |          |

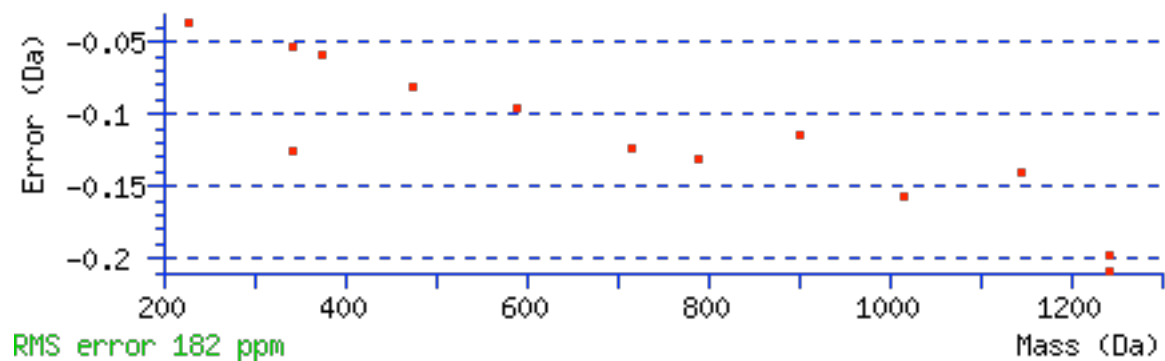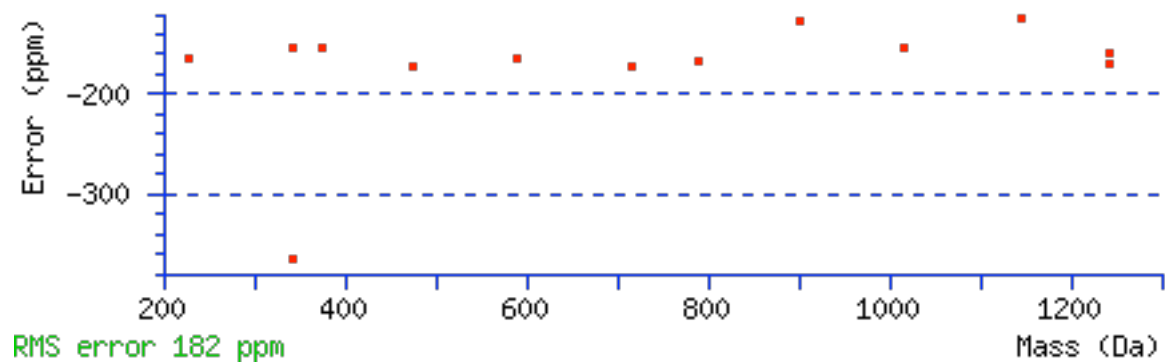

MS/MS Fragmentation of **QKQDLAAILDQLHNTYQM**  
Found in **New\_Precursor\_GSTPEDIA**, (3 exons, 112 aa), EST(BM322032)  
Match to Query 359: 2111.592648 from(1056.803600,2+) intensity(15571.3008)  
Data file Maldi\_All.mgf

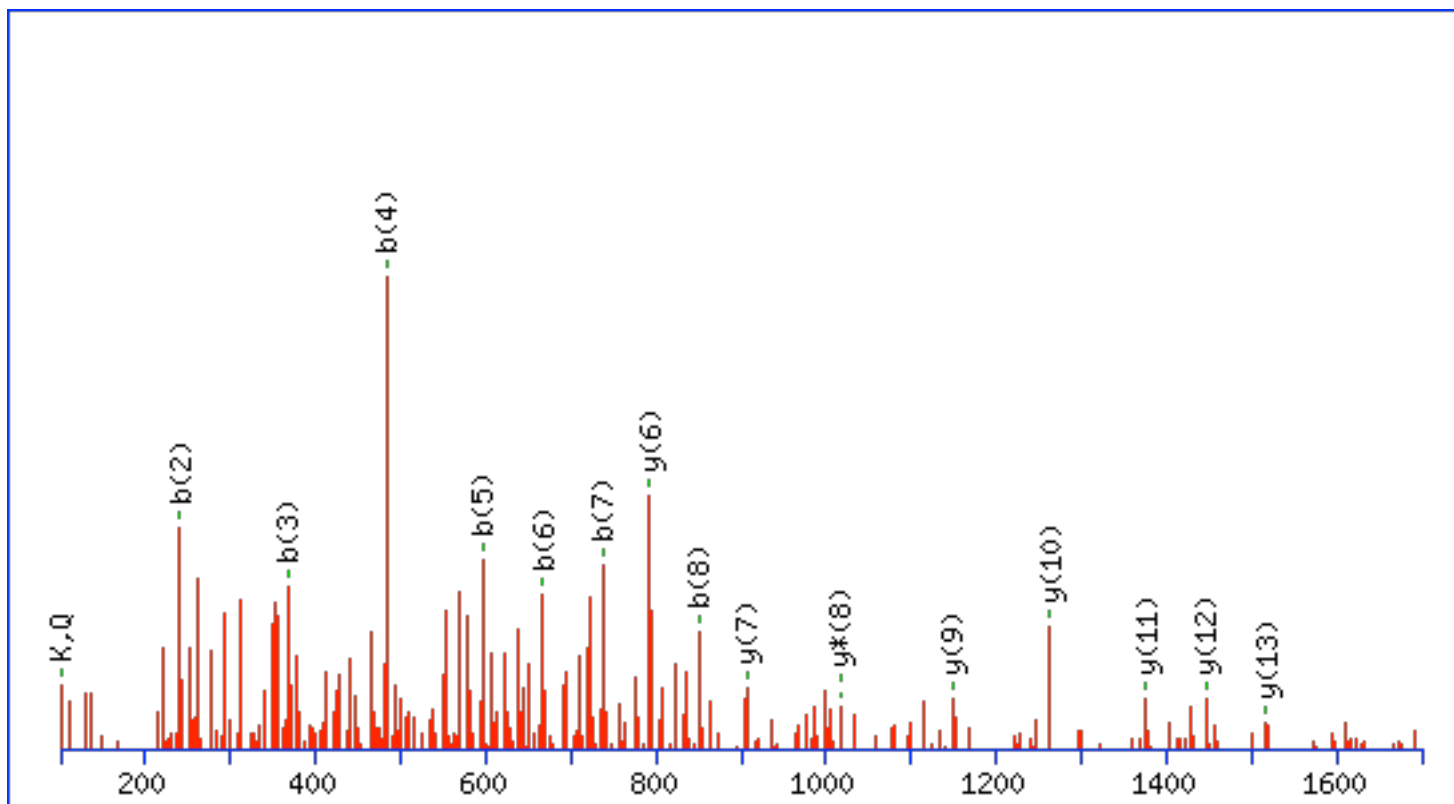

**Monoisotopic mass of neutral peptide Mr(calc):** 2112.0310 **Variable modifications:** N-term : Gln->pyro-Glu (N-term Q)  
**Ions Score:** 70 **Expect:** 0.003 **Matches (Bold Red):** 20/288 fragment ions using 25 most intense peaks

| # | Immon.          | a        | a*       | a <sup>0</sup> | b               | b*       | b <sup>0</sup> | Seq. | y         | y*        | y <sup>0</sup> | #  |
|---|-----------------|----------|----------|----------------|-----------------|----------|----------------|------|-----------|-----------|----------------|----|
| 1 | <b>101.0709</b> | 84.0444  | 67.0179  |                | 112.0393        | 95.0128  |                | Q    |           |           |                | 18 |
| 2 | <b>101.1073</b> | 212.1394 | 195.1128 |                | <b>240.1343</b> | 223.1077 |                | K    | 2002.0062 | 1984.9797 | 1983.9957      | 17 |
| 3 | <b>101.0709</b> | 340.1979 | 323.1714 |                | <b>368.1929</b> | 351.1663 |                | Q    | 1873.9113 | 1856.8847 | 1855.9007      | 16 |
| 4 | 88.0393         | 455.2249 | 438.1983 | 437.2143       | <b>483.2198</b> | 466.1933 | 465.2092       | D    | 1745.8527 | 1728.8262 | 1727.8421      | 15 |

|    |          |           |           |           |           |           |           |   |           |           |           |    |
|----|----------|-----------|-----------|-----------|-----------|-----------|-----------|---|-----------|-----------|-----------|----|
| 5  | 86.0964  | 568.3090  | 551.2824  | 550.2984  | 596.3039  | 579.2773  | 578.2933  | L | 1630.8258 | 1613.7992 | 1612.8152 | 14 |
| 6  | 44.0495  | 639.3461  | 622.3195  | 621.3355  | 667.3410  | 650.3144  | 649.3304  | A | 1517.7417 | 1500.7151 | 1499.7311 | 13 |
| 7  | 44.0495  | 710.3832  | 693.3566  | 692.3726  | 738.3781  | 721.3515  | 720.3675  | A | 1446.7046 | 1429.6780 | 1428.6940 | 12 |
| 8  | 86.0964  | 823.4672  | 806.4407  | 805.4567  | 851.4622  | 834.4356  | 833.4516  | I | 1375.6675 | 1358.6409 | 1357.6569 | 11 |
| 9  | 86.0964  | 936.5513  | 919.5248  | 918.5407  | 964.5462  | 947.5197  | 946.5357  | L | 1262.5834 | 1245.5569 | 1244.5728 | 10 |
| 10 | 88.0393  | 1051.5783 | 1034.5517 | 1033.5677 | 1079.5732 | 1062.5466 | 1061.5626 | D | 1149.4993 | 1132.4728 | 1131.4888 | 9  |
| 11 | 101.0709 | 1179.6368 | 1162.6103 | 1161.6263 | 1207.6317 | 1190.6052 | 1189.6212 | Q | 1034.4724 | 1017.4458 | 1016.4618 | 8  |
| 12 | 86.0964  | 1292.7209 | 1275.6943 | 1274.7103 | 1320.7158 | 1303.6893 | 1302.7052 | L | 906.4138  | 889.3873  | 888.4033  | 7  |
| 13 | 110.0713 | 1429.7798 | 1412.7533 | 1411.7692 | 1457.7747 | 1440.7482 | 1439.7642 | H | 793.3298  | 776.3032  | 775.3192  | 6  |
| 14 | 87.0553  | 1543.8227 | 1526.7962 | 1525.8122 | 1571.8176 | 1554.7911 | 1553.8071 | N | 656.2708  | 639.2443  | 638.2603  | 5  |
| 15 | 74.0600  | 1644.8704 | 1627.8439 | 1626.8598 | 1672.8653 | 1655.8388 | 1654.8548 | T | 542.2279  | 525.2014  | 524.2173  | 4  |
| 16 | 136.0757 | 1807.9337 | 1790.9072 | 1789.9232 | 1835.9287 | 1818.9021 | 1817.9181 | Y | 441.1802  | 424.1537  |           | 3  |
| 17 | 101.0709 | 1935.9923 | 1918.9658 | 1917.9818 | 1963.9872 | 1946.9607 | 1945.9767 | Q | 278.1169  | 261.0904  |           | 2  |
| 18 | 104.0528 |           |           |           |           |           |           | M | 150.0583  |           |           | 1  |

| Seq    | ya       | yb       | Seq     | ya       | yb       | Seq   | ya       | yb       |
|--------|----------|----------|---------|----------|----------|-------|----------|----------|
| KQ     | 229.1659 | 257.1608 | KQD     | 344.1928 | 372.1878 | KQDL  | 457.2769 | 485.2718 |
| KQDLA  | 528.3140 | 556.3089 | KQDLAA  | 599.3511 | 627.3461 | QD    | 216.0979 | 244.0928 |
| QDL    | 329.1819 | 357.1769 | QDLA    | 400.2191 | 428.2140 | QDLAA | 471.2562 | 499.2511 |
| QDLAAI | 584.3402 | 612.3352 | QDLAAIL | 697.4243 | 725.4192 | DL    | 201.1234 | 229.1183 |
| DLA    | 272.1605 | 300.1554 | DLAA    | 343.1976 | 371.1925 | DLAAI | 456.2817 | 484.2766 |
| DLAAIL | 569.3657 | 597.3606 | DLAAILD | 684.3927 | 712.3876 | LA    | 157.1335 | 185.1285 |
| LAA    | 228.1707 | 256.1656 | LAAI    | 341.2547 | 369.2496 | LAAIL | 454.3388 | 482.3337 |
| LAAILD | 569.3657 | 597.3606 | LAAILDQ | 697.4243 | 725.4192 | AA    | 115.0866 | 143.0815 |
| AAI    | 228.1707 | 256.1656 | AAIL    | 341.2547 | 369.2496 | AAILD | 456.2817 | 484.2766 |

|               |          |          |                |          |          |               |          |          |
|---------------|----------|----------|----------------|----------|----------|---------------|----------|----------|
| <b>AAILDQ</b> | 584.3402 | 612.3352 | <b>AAILDQL</b> | 697.4243 | 725.4192 | <b>AI</b>     | 157.1335 | 185.1285 |
| <b>AIL</b>    | 270.2176 | 298.2125 | <b>AILD</b>    | 385.2445 | 413.2395 | <b>AILDQ</b>  | 513.3031 | 541.2980 |
| <b>AILDQL</b> | 626.3872 | 654.3821 | <b>IL</b>      | 199.1805 | 227.1754 | <b>ILD</b>    | 314.2074 | 342.2023 |
| <b>ILDQ</b>   | 442.2660 | 470.2609 | <b>ILDQL</b>   | 555.3501 | 583.3450 | <b>ILDQLH</b> | 692.4090 | 720.4039 |
| <b>LD</b>     | 201.1234 | 229.1183 | <b>LDQ</b>     | 329.1819 | 357.1769 | <b>LDQL</b>   | 442.2660 | 470.2609 |
| <b>LDQLH</b>  | 579.3249 | 607.3198 | <b>LDQLHN</b>  | 693.3678 | 721.3628 | <b>DQ</b>     | 216.0979 | 244.0928 |
| <b>DQL</b>    | 329.1819 | 357.1769 | <b>DQLH</b>    | 466.2409 | 494.2358 | <b>DQLHN</b>  | 580.2838 | 608.2787 |
| <b>DQLHNT</b> | 681.3315 | 709.3264 | <b>QL</b>      | 214.1550 | 242.1499 | <b>QLH</b>    | 351.2139 | 379.2088 |
| <b>QLHN</b>   | 465.2568 | 493.2518 | <b>QLHNT</b>   | 566.3045 | 594.2994 | <b>LH</b>     | 223.1553 | 251.1503 |
| <b>LHN</b>    | 337.1983 | 365.1932 | <b>LHNT</b>    | 438.2459 | 466.2409 | <b>LHNTY</b>  | 601.3093 | 629.3042 |
| <b>HN</b>     | 224.1142 | 252.1091 | <b>HNT</b>     | 325.1619 | 353.1568 | <b>HNTY</b>   | 488.2252 | 516.2201 |
| <b>HNTYQ</b>  | 616.2838 | 644.2787 | <b>NT</b>      | 188.1030 | 216.0979 | <b>NTY</b>    | 351.1663 | 379.1612 |
| <b>NTYQ</b>   | 479.2249 | 507.2198 | <b>TY</b>      | 237.1234 | 265.1183 | <b>TYQ</b>    | 365.1819 | 393.1769 |
| <b>YQ</b>     | 264.1343 | 292.1292 |                |          |          |               |          |          |

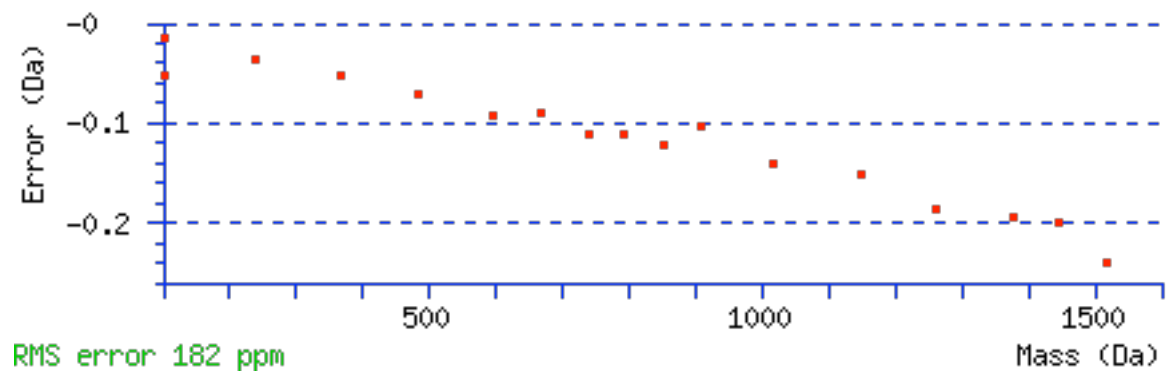

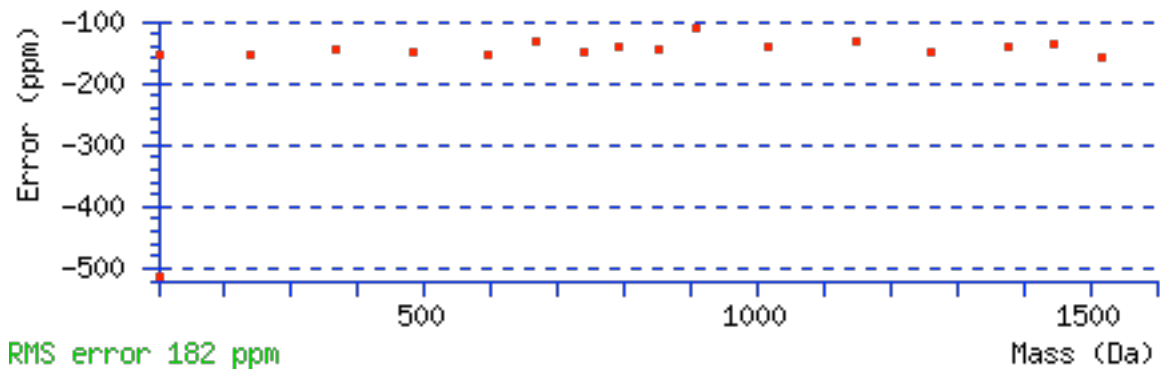

MS/MS Fragmentation of **NFGGSMEPMQSGFY**  
Found in **New\_Precursor\_FGGANEPM**, (2 exons, 184 aa), EST(CD294941)  
Match to Query 277: 1550.310648 from(776.162600,2+) intensity(718.3754)  
Data file Maldi\_All.mgf

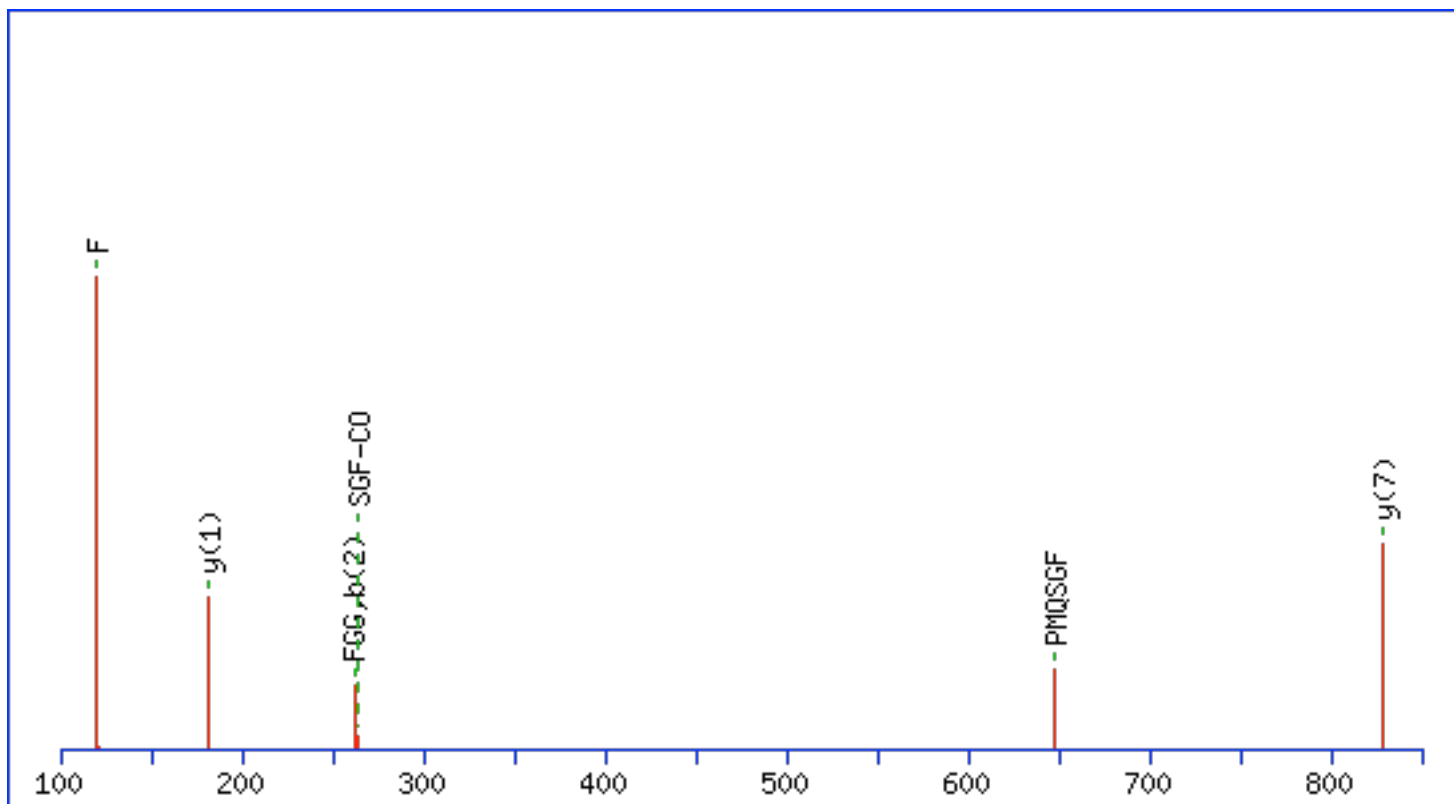

**Monoisotopic mass of neutral peptide Mr(calc): 1550.6170 Ions Score: 18 Expect: 5.2e+02 Matches (Bold Red): 8/207**  
 fragment ions using 6 most intense peaks

| # | Immon.          | a        | a*       | a <sup>0</sup> | b               | b*       | b <sup>0</sup> | Seq. | y         | y*        | y <sup>0</sup> | #  |
|---|-----------------|----------|----------|----------------|-----------------|----------|----------------|------|-----------|-----------|----------------|----|
| 1 | 87.0553         | 87.0553  | 70.0287  |                | 115.0502        | 98.0237  |                | N    |           |           |                | 14 |
| 2 | <b>120.0808</b> | 234.1237 | 217.0972 |                | <b>262.1186</b> | 245.0921 |                | F    | 1437.5814 | 1420.5548 | 1419.5708      | 13 |
| 3 | 30.0338         | 291.1452 | 274.1186 |                | 319.1401        | 302.1135 |                | G    | 1290.5129 | 1273.4864 | 1272.5024      | 12 |
| 4 | 30.0338         | 348.1666 | 331.1401 |                | 376.1615        | 359.1350 |                | G    | 1233.4915 | 1216.4649 | 1215.4809      | 11 |



|    |          |           |           |           |           |           |           |   |           |           |           |    |
|----|----------|-----------|-----------|-----------|-----------|-----------|-----------|---|-----------|-----------|-----------|----|
| 5  | 60.0444  | 435.1987  | 418.1721  | 417.1881  | 463.1936  | 446.1670  | 445.1830  | S | 1176.4700 | 1159.4435 | 1158.4594 | 10 |
| 6  | 104.0528 | 566.2391  | 549.2126  | 548.2286  | 594.2341  | 577.2075  | 576.2235  | M | 1089.4380 | 1072.4114 | 1071.4274 | 9  |
| 7  | 102.0550 | 695.2817  | 678.2552  | 677.2712  | 723.2767  | 706.2501  | 705.2661  | E | 958.3975  | 941.3709  | 940.3869  | 8  |
| 8  | 70.0651  | 792.3345  | 775.3080  | 774.3239  | 820.3294  | 803.3029  | 802.3188  | P | 829.3549  | 812.3284  | 811.3443  | 7  |
| 9  | 104.0528 | 923.3750  | 906.3484  | 905.3644  | 951.3699  | 934.3434  | 933.3593  | M | 732.3021  | 715.2756  | 714.2916  | 6  |
| 10 | 101.0709 | 1051.4336 | 1034.4070 | 1033.4230 | 1079.4285 | 1062.4019 | 1061.4179 | Q | 601.2617  | 584.2351  | 583.2511  | 5  |
| 11 | 60.0444  | 1138.4656 | 1121.4390 | 1120.4550 | 1166.4605 | 1149.4340 | 1148.4499 | S | 473.2031  |           | 455.1925  | 4  |
| 12 | 30.0338  | 1195.4871 | 1178.4605 | 1177.4765 | 1223.4820 | 1206.4554 | 1205.4714 | G | 386.1710  |           |           | 3  |
| 13 | 120.0808 | 1342.5555 | 1325.5289 | 1324.5449 | 1370.5504 | 1353.5238 | 1352.5398 | F | 329.1496  |           |           | 2  |
| 14 | 136.0757 |           |           |           |           |           |           | Y | 182.0812  |           |           | 1  |

| Seq    | ya       | yb       | Seq    | ya       | yb       | Seq     | ya       | yb       |
|--------|----------|----------|--------|----------|----------|---------|----------|----------|
| FG     | 177.1022 | 205.0972 | FGG    | 234.1237 | 262.1186 | FGGS    | 321.1557 | 349.1506 |
| FGGSM  | 452.1962 | 480.1911 | FGGSME | 581.2388 | 609.2337 | FGGSMEP | 678.2916 | 706.2865 |
| GG     | 87.0553  | 115.0502 | GGG    | 174.0873 | 202.0822 | GGSM    | 305.1278 | 333.1227 |
| GGSM   | 434.1704 | 462.1653 | GGSM   | 531.2232 | 559.2181 | GGSM    | 662.2636 | 690.2586 |
| GS     | 117.0659 | 145.0608 | GSM    | 248.1063 | 276.1013 | GSME    | 377.1489 | 405.1438 |
| GSMEP  | 474.2017 | 502.1966 | GSMEP  | 605.2422 | 633.2371 | SM      | 191.0849 | 219.0798 |
| SME    | 320.1275 | 348.1224 | SMEP   | 417.1802 | 445.1751 | SMEP    | 548.2207 | 576.2156 |
| SMEPMQ | 676.2793 | 704.2742 | ME     | 233.0954 | 261.0904 | MEP     | 330.1482 | 358.1431 |
| MEP    | 461.1887 | 489.1836 | MEP    | 589.2473 | 617.2422 | MEP     | 676.2793 | 704.2742 |
| EP     | 199.1077 | 227.1026 | EPM    | 330.1482 | 358.1431 | EPMQ    | 458.2068 | 486.2017 |
| EPMQS  | 545.2388 | 573.2337 | EPMQSG | 602.2603 | 630.2552 | PM      | 201.1056 | 229.1005 |
| PMQ    | 329.1642 | 357.1591 | PMQS   | 416.1962 | 444.1911 | PMQSG   | 473.2177 | 501.2126 |
| PMQSGF | 620.2861 | 648.2810 | MQ     | 232.1114 | 260.1063 | MQS     | 319.1435 | 347.1384 |

|             |                 |          |              |          |          |           |          |          |
|-------------|-----------------|----------|--------------|----------|----------|-----------|----------|----------|
| <b>MQSG</b> | 376.1649        | 404.1598 | <b>MQSGF</b> | 523.2333 | 551.2282 | <b>QS</b> | 188.1030 | 216.0979 |
| <b>QSG</b>  | 245.1244        | 273.1193 | <b>QSGF</b>  | 392.1928 | 420.1878 | <b>SG</b> | 117.0659 | 145.0608 |
| <b>SGF</b>  | <b>264.1343</b> | 292.1292 | <b>GF</b>    | 177.1022 | 205.0972 |           |          |          |

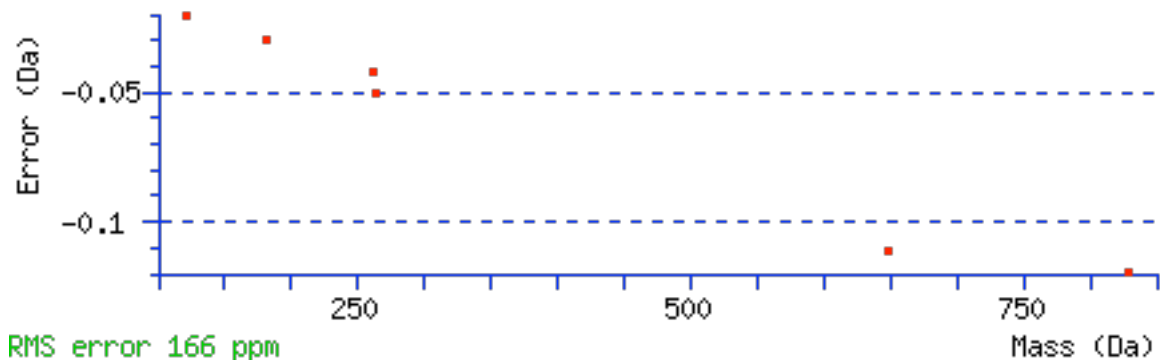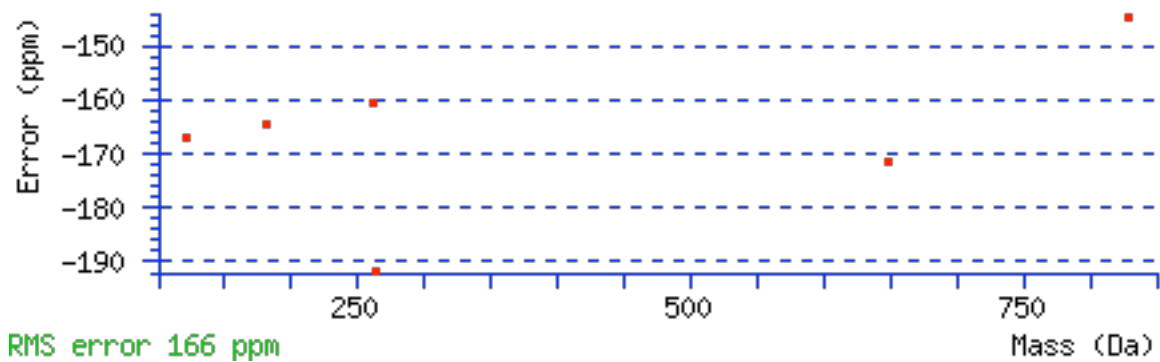

MS/MS Fragmentation of **NFGSGLNMEPMQSGFY**  
 Found in **New\_Precursor\_FGGANEPM**, (2 exons, 184 aa), EST(CD294941)

Match to Query 725: 1777.760968 from(889.887760,2+) intensity(173056.0000)

Title: Cmpd 228, +MSn(890.4839), 34.8 min

Data file Qtof\_all.mgf

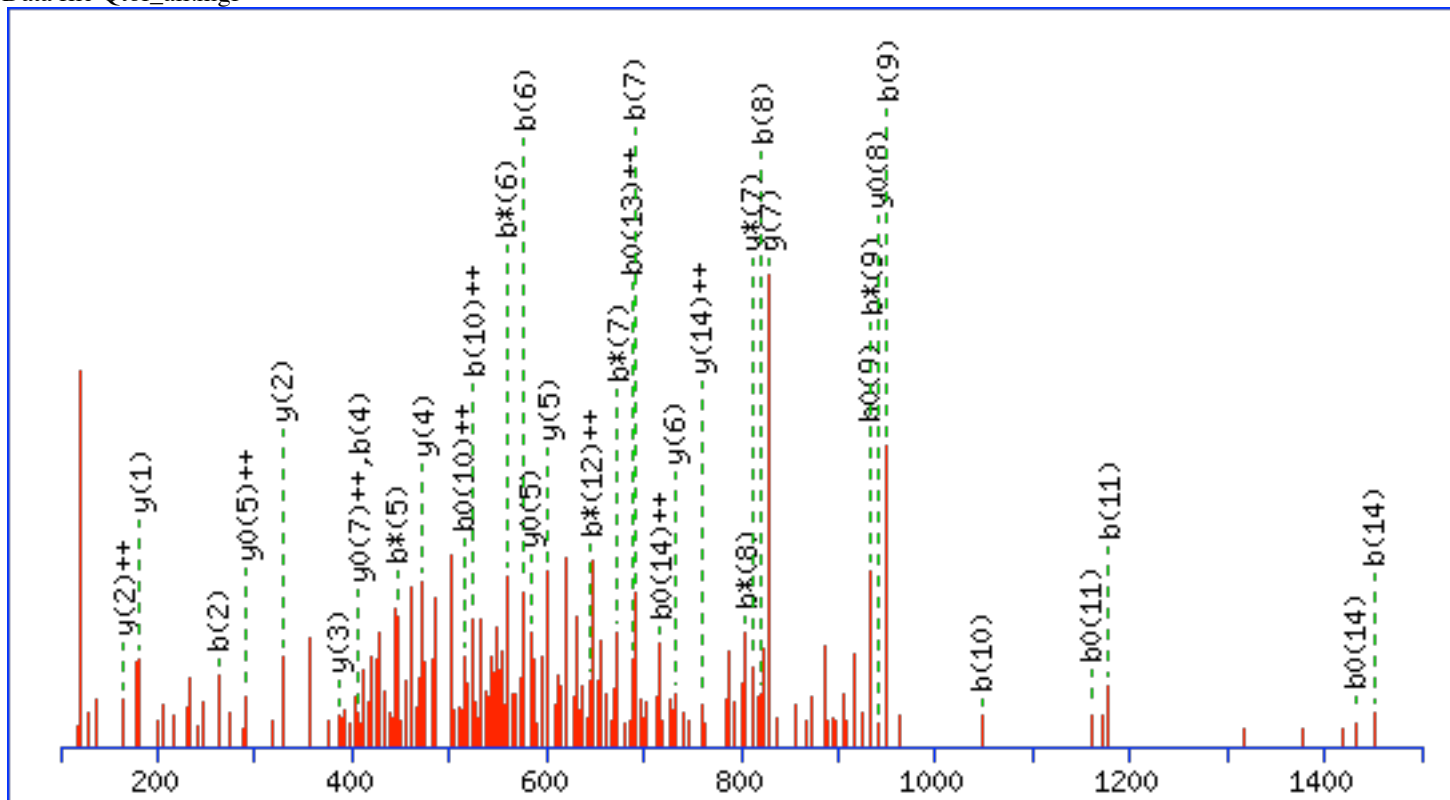

**Monoisotopic mass of neutral peptide Mr(calc): 1777.7440 Ions Score: 35 Expect: 1.7 Matches (Bold Red): 36/160**  
 fragment ions using 86 most intense peaks

| # | b               | b <sup>++</sup> | b <sup>*</sup> | b <sup>***</sup> | b <sup>0</sup> | b <sup>0++</sup> | Seq. | y         | y <sup>++</sup> | y <sup>*</sup> | y <sup>***</sup> | y <sup>0</sup> | y <sup>0++</sup> | #  |
|---|-----------------|-----------------|----------------|------------------|----------------|------------------|------|-----------|-----------------|----------------|------------------|----------------|------------------|----|
| 1 | 115.0502        | 58.0287         | 98.0237        | 49.5155          |                |                  | N    |           |                 |                |                  |                |                  | 16 |
| 2 | <b>262.1186</b> | 131.5629        | 245.0921       | 123.0497         |                |                  | F    | 1664.7083 | 832.8578        | 1647.6818      | 824.3445         | 1646.6978      | 823.8525         | 15 |

|    |                  |                 |                 |                 |                  |                 |   |                 |                 |                 |          |                 |                 |    |
|----|------------------|-----------------|-----------------|-----------------|------------------|-----------------|---|-----------------|-----------------|-----------------|----------|-----------------|-----------------|----|
| 3  | 319.1401         | 160.0737        | 302.1135        | 151.5604        |                  |                 | G | 1517.6399       | <b>759.3236</b> | 1500.6134       | 750.8103 | 1499.6294       | 750.3183        | 14 |
| 4  | <b>406.1721</b>  | 203.5897        | 389.1456        | 195.0764        | 388.1615         | 194.5844        | S | 1460.6185       | 730.8129        | 1443.5919       | 722.2996 | 1442.6079       | 721.8076        | 13 |
| 5  | 463.1936         | 232.1004        | <b>446.1670</b> | 223.5871        | 445.1830         | 223.0951        | G | 1373.5864       | 687.2969        | 1356.5599       | 678.7836 | 1355.5759       | 678.2916        | 12 |
| 6  | <b>576.2776</b>  | 288.6425        | <b>559.2511</b> | 280.1292        | 558.2671         | 279.6372        | L | 1316.5650       | 658.7861        | 1299.5384       | 650.2728 | 1298.5544       | 649.7808        | 11 |
| 7  | <b>690.3206</b>  | 345.6639        | <b>673.2940</b> | 337.1506        | 672.3100         | 336.6586        | N | 1203.4809       | 602.2441        | 1186.4544       | 593.7308 | 1185.4703       | 593.2388        | 10 |
| 8  | <b>821.3610</b>  | 411.1842        | <b>804.3345</b> | 402.6709        | 803.3505         | 402.1789        | M | 1089.4380       | 545.2226        | 1072.4114       | 536.7094 | 1071.4274       | 536.2173        | 9  |
| 9  | <b>950.4036</b>  | 475.7055        | <b>933.3771</b> | 467.1922        | <b>932.3931</b>  | 466.7002        | E | 958.3975        | 479.7024        | 941.3709        | 471.1891 | <b>940.3869</b> | 470.6971        | 8  |
| 10 | <b>1047.4564</b> | <b>524.2318</b> | 1030.4299       | 515.7186        | 1029.4458        | <b>515.2266</b> | P | <b>829.3549</b> | 415.1811        | <b>812.3284</b> | 406.6678 | 811.3443        | <b>406.1758</b> | 7  |
| 11 | <b>1178.4969</b> | 589.7521        | 1161.4703       | 581.2388        | <b>1160.4863</b> | 580.7468        | M | <b>732.3021</b> | 366.6547        | 715.2756        | 358.1414 | 714.2916        | 357.6494        | 6  |
| 12 | 1306.5555        | 653.7814        | 1289.5289       | <b>645.2681</b> | 1288.5449        | 644.7761        | Q | <b>601.2617</b> | 301.1345        | 584.2351        | 292.6212 | <b>583.2511</b> | <b>292.1292</b> | 5  |
| 13 | 1393.5875        | 697.2974        | 1376.5609       | 688.7841        | 1375.5769        | <b>688.2921</b> | S | <b>473.2031</b> | 237.1052        |                 |          | 455.1925        | 228.0999        | 4  |
| 14 | <b>1450.6090</b> | 725.8081        | 1433.5824       | 717.2948        | <b>1432.5984</b> | <b>716.8028</b> | G | <b>386.1710</b> | 193.5892        |                 |          |                 |                 | 3  |
| 15 | 1597.6774        | 799.3423        | 1580.6508       | 790.8291        | 1579.6668        | 790.3370        | F | <b>329.1496</b> | <b>165.0784</b> |                 |          |                 |                 | 2  |
| 16 |                  |                 |                 |                 |                  |                 | Y | <b>182.0812</b> | 91.5442         |                 |          |                 |                 | 1  |

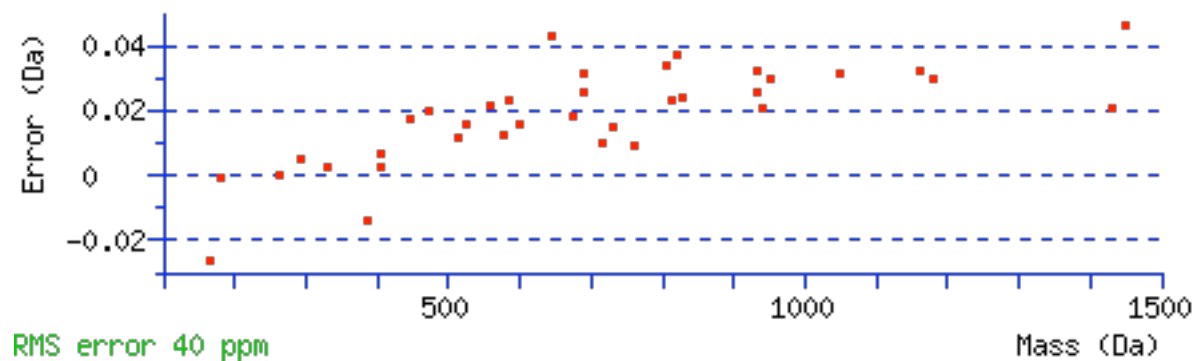

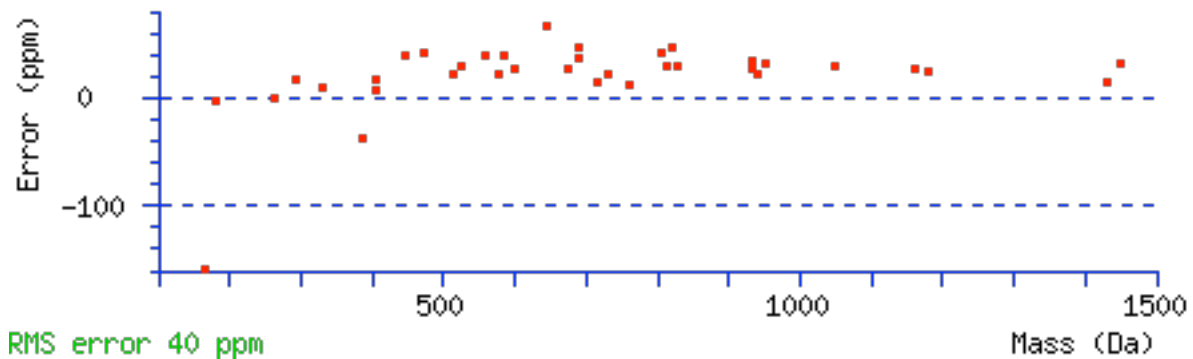

MS/MS Fragmentation of **FGGANEPMRSGFF**

Found in **New\_Precursor\_FGGANEPM**, (2 exons, 184 aa), EST(CD294941)

Match to Query 170: 1415.331248 from(708.672900,2+) intensity(12263.6895)

Data file Maldi\_All.mgf

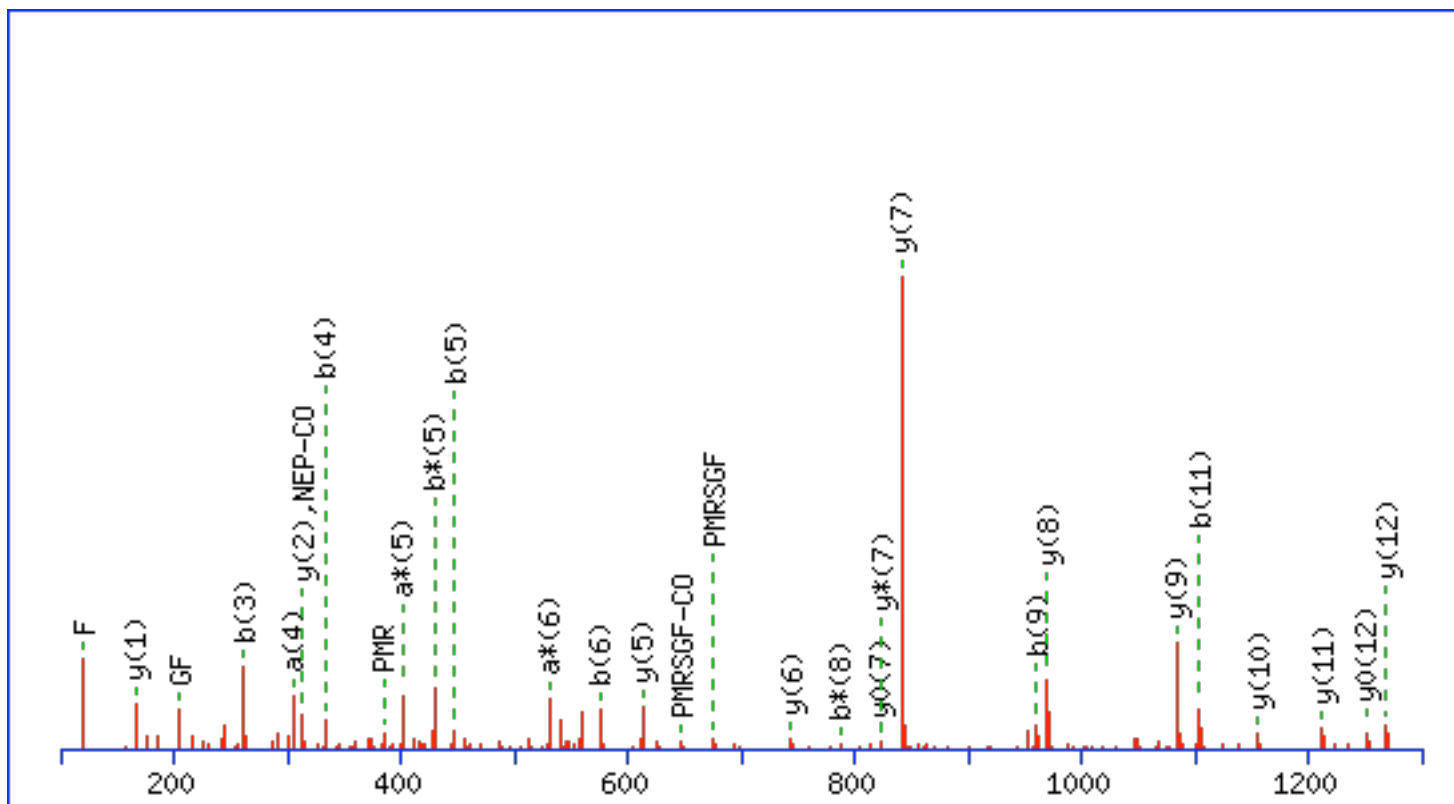

**Monoisotopic mass of neutral peptide Mr(calc):** 1415.6292 **Ions Score:** 86 **Expect:** 7.1e-05 **Matches (Bold Red):** 35/190 fragment ions using 40 most intense peaks

| # | Immon.          | a               | a* | a <sup>0</sup> | b               | b* | b <sup>0</sup> | d | Seq. | v         | w | y                | y*        | y <sup>0</sup>   | #  |
|---|-----------------|-----------------|----|----------------|-----------------|----|----------------|---|------|-----------|---|------------------|-----------|------------------|----|
| 1 | <b>120.0808</b> | <b>120.0808</b> |    |                | 148.0757        |    |                |   | F    |           |   |                  |           |                  | 13 |
| 2 | 30.0338         | 177.1022        |    |                | <b>205.0972</b> |    |                |   | G    |           |   | <b>1269.5681</b> | 1252.5415 | <b>1251.5575</b> | 12 |
| 3 | 30.0338         | 234.1237        |    |                | <b>262.1186</b> |    |                |   | G    |           |   | <b>1212.5466</b> | 1195.5201 | 1194.5361        | 11 |
| 4 | 44.0495         | <b>305.1608</b> |    |                | <b>333.1557</b> |    |                |   | A    | 1139.4939 |   | <b>1155.5252</b> | 1138.4986 | 1137.5146        | 10 |

|    |                 |           |                 |           |                  |                 |           |           |  |   |           |           |                  |                 |                 |   |
|----|-----------------|-----------|-----------------|-----------|------------------|-----------------|-----------|-----------|--|---|-----------|-----------|------------------|-----------------|-----------------|---|
| 5  | 87.0553         | 419.2037  | <b>402.1772</b> |           | <b>447.1987</b>  | <b>430.1721</b> |           |           |  | N | 1025.4509 | 1024.4557 | <b>1084.4880</b> | 1067.4615       | 1066.4775       | 9 |
| 6  | 102.0550        | 548.2463  | <b>531.2198</b> | 530.2358  | <b>576.2413</b>  | 559.2147        | 558.2307  |           |  | E | 896.4083  | 895.4131  | <b>970.4451</b>  | 953.4186        | 952.4345        | 8 |
| 7  | 70.0651         | 645.2991  | 628.2726        | 627.2885  | 673.2940         | 656.2675        | 655.2835  |           |  | P | 799.3556  | 798.3603  | <b>841.4025</b>  | <b>824.3760</b> | <b>823.3920</b> | 7 |
| 8  | 104.0528        | 776.3396  | 759.3130        | 758.3290  | 804.3345         | <b>787.3080</b> | 786.3239  |           |  | M | 668.3151  | 667.3198  | <b>744.3498</b>  | 727.3232        | 726.3392        | 6 |
| 9  | 129.1135        | 932.4407  | 915.4141        | 914.4301  | <b>960.4356</b>  | 943.4091        | 942.4250  | 847.3767  |  | R | 512.2140  | 511.2187  | <b>613.3093</b>  | 596.2827        | 595.2987        | 5 |
| 10 | 60.0444         | 1019.4727 | 1002.4462       | 1001.4622 | 1047.4676        | 1030.4411       | 1029.4571 | 1003.4778 |  | S |           |           | 457.2082         |                 | 439.1976        | 4 |
| 11 | 30.0338         | 1076.4942 | 1059.4676       | 1058.4836 | <b>1104.4891</b> | 1087.4626       | 1086.4785 |           |  | G |           |           | 370.1761         |                 |                 | 3 |
| 12 | <b>120.0808</b> | 1223.5626 | 1206.5361       | 1205.5520 | <b>1251.5575</b> | 1234.5310       | 1233.5470 |           |  | F |           |           | <b>313.1547</b>  |                 |                 | 2 |
| 13 | <b>120.0808</b> |           |                 |           |                  |                 |           |           |  | F |           |           | <b>166.0863</b>  |                 |                 | 1 |

| Seq    | ya              | yb              | Seq    | ya       | yb              | Seq     | ya              | yb       |
|--------|-----------------|-----------------|--------|----------|-----------------|---------|-----------------|----------|
| GG     | 87.0553         | 115.0502        | GGA    | 158.0924 | 186.0873        | GGAN    | 272.1353        | 300.1302 |
| GGANE  | 401.1779        | 429.1728        | GGANEP | 498.2307 | 526.2256        | GGANEPM | 629.2712        | 657.2661 |
| GA     | 101.0709        | 129.0659        | GAN    | 215.1139 | 243.1088        | GANE    | 344.1565        | 372.1514 |
| GANEP  | 441.2092        | 469.2041        | GANEPM | 572.2497 | 600.2446        | AN      | 158.0924        | 186.0873 |
| ANE    | 287.1350        | 315.1299        | ANEP   | 384.1878 | 412.1827        | ANEPM   | 515.2282        | 543.2232 |
| ANEPMR | 671.3294        | 699.3243        | NE     | 216.0979 | 244.0928        | NEP     | <b>313.1506</b> | 341.1456 |
| NEPM   | 444.1911        | 472.1860        | NEPMR  | 600.2922 | 628.2872        | NEPMRS  | 687.3243        | 715.3192 |
| EP     | 199.1077        | 227.1026        | EPM    | 330.1482 | 358.1431        | EPMR    | 486.2493        | 514.2442 |
| EPMRS  | 573.2813        | 601.2763        | EPMRSG | 630.3028 | 658.2977        | PM      | 201.1056        | 229.1005 |
| PMR    | 357.2067        | <b>385.2016</b> | PMRS   | 444.2387 | 472.2337        | PMRSG   | 501.2602        | 529.2551 |
| PMRSGF | <b>648.3286</b> | <b>676.3235</b> | MR     | 260.1540 | 288.1489        | MRS     | 347.1860        | 375.1809 |
| MRS    | 404.2074        | 432.2024        | MRS    | 551.2759 | 579.2708        | RS      | 216.1455        | 244.1404 |
| RSG    | 273.1670        | 301.1619        | RSGF   | 420.2354 | 448.2303        | SG      | 117.0659        | 145.0608 |
| SGF    | 264.1343        | 292.1292        | GF     | 177.1022 | <b>205.0972</b> |         |                 |          |

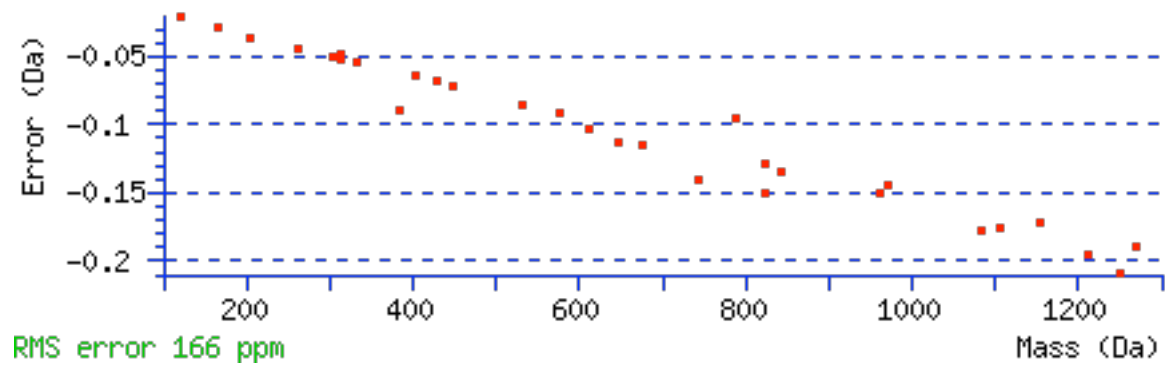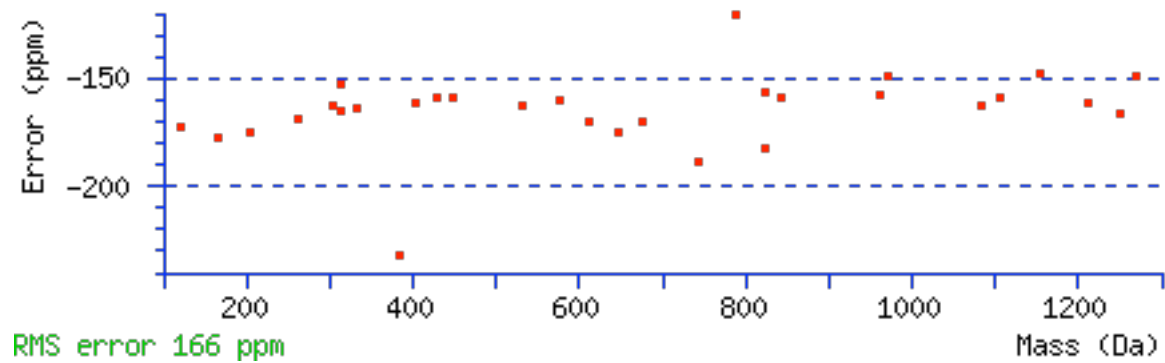

MS/MS Fragmentation of **FGSGLDSMQSGFY**

Found in **New\_Precursor\_FGGANEPM**, (2 exons, 184 aa), EST(CD294941)

Match to Query 548: 1394.613908 from(698.314230,2+) intensity(339896.0000)

Title: Cmpd 208, +MSn(698.8380), 33.2 min

Data file Qtof\_all.mgf



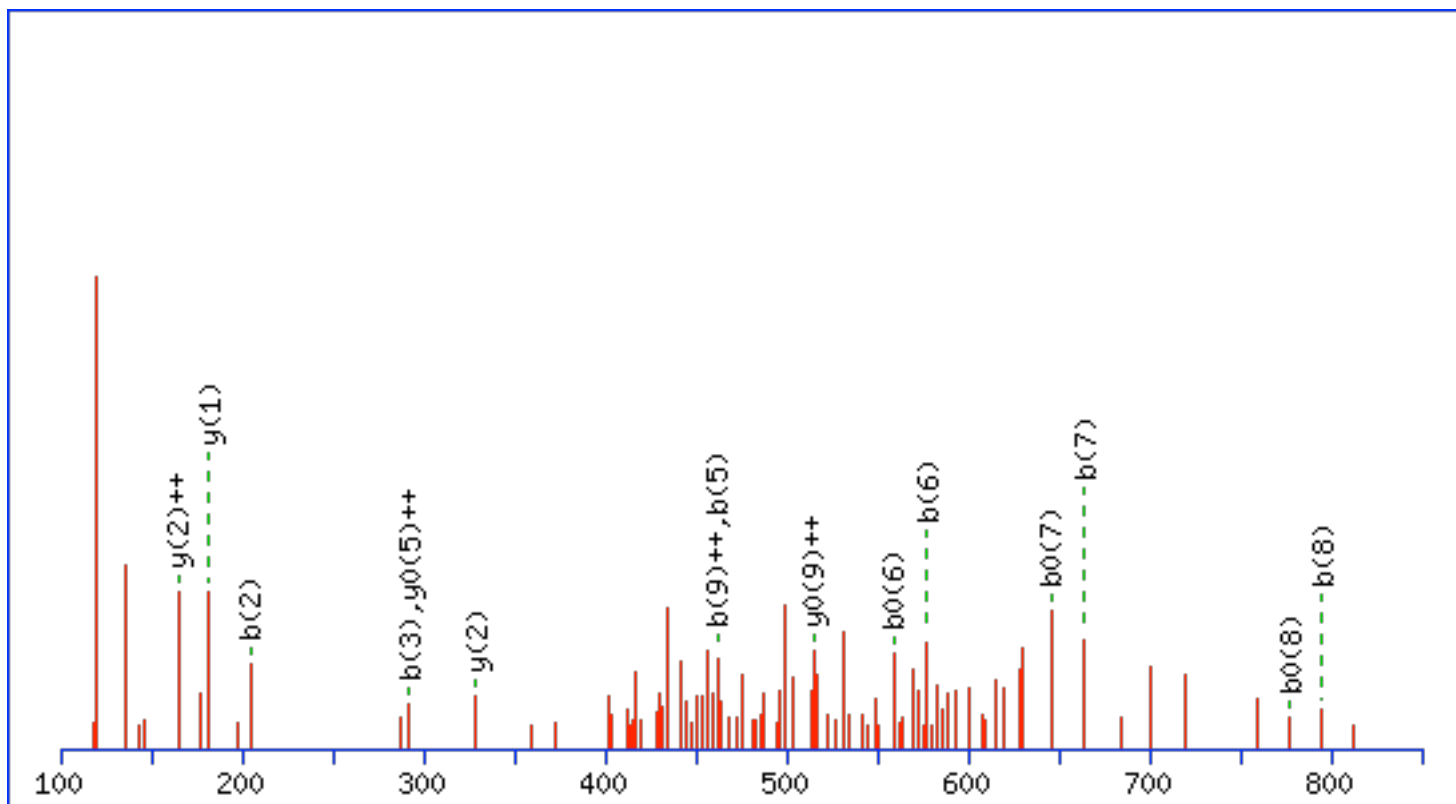

**Monoisotopic mass of neutral peptide Mr(calc): 1394.5813 Ions Score: 21 Expect: 68 Matches (Bold Red): 15/110**  
 fragment ions using 32 most intense peaks

| # | b               | b <sup>++</sup> | b <sup>*</sup> | b <sup>***</sup> | b <sup>0</sup> | b <sup>0++</sup> | Seq. | y         | y <sup>++</sup> | y <sup>*</sup> | y <sup>***</sup> | y <sup>0</sup> | y <sup>0++</sup> | #  |
|---|-----------------|-----------------|----------------|------------------|----------------|------------------|------|-----------|-----------------|----------------|------------------|----------------|------------------|----|
| 1 | 148.0757        | 74.5415         |                |                  |                |                  | F    |           |                 |                |                  |                |                  | 13 |
| 2 | <b>205.0972</b> | 103.0522        |                |                  |                |                  | G    | 1248.5201 | 624.7637        | 1231.4936      | 616.2504         | 1230.5096      | 615.7584         | 12 |
| 3 | <b>292.1292</b> | 146.5682        |                |                  | 274.1186       | 137.5629         | S    | 1191.4987 | 596.2530        | 1174.4721      | 587.7397         | 1173.4881      | 587.2477         | 11 |
| 4 | 349.1506        | 175.0790        |                |                  | 331.1401       | 166.0737         | G    | 1104.4666 | 552.7370        | 1087.4401      | 544.2237         | 1086.4561      | 543.7317         | 10 |

|    |                 |                 |           |          |                 |          |   |                 |                 |           |          |           |                 |   |
|----|-----------------|-----------------|-----------|----------|-----------------|----------|---|-----------------|-----------------|-----------|----------|-----------|-----------------|---|
| 5  | <b>462.2347</b> | 231.6210        |           |          | 444.2241        | 222.6157 | L | 1047.4452       | 524.2262        | 1030.4186 | 515.7130 | 1029.4346 | <b>515.2209</b> | 9 |
| 6  | <b>577.2617</b> | 289.1345        |           |          | <b>559.2511</b> | 280.1292 | D | 934.3611        | 467.6842        | 917.3346  | 459.1709 | 916.3505  | 458.6789        | 8 |
| 7  | <b>664.2937</b> | 332.6505        |           |          | <b>646.2831</b> | 323.6452 | S | 819.3342        | 410.1707        | 802.3076  | 401.6574 | 801.3236  | 401.1654        | 7 |
| 8  | <b>795.3342</b> | 398.1707        |           |          | <b>777.3236</b> | 389.1654 | M | 732.3021        | 366.6547        | 715.2756  | 358.1414 | 714.2916  | 357.6494        | 6 |
| 9  | 923.3927        | <b>462.2000</b> | 906.3662  | 453.6867 | 905.3822        | 453.1947 | Q | 601.2617        | 301.1345        | 584.2351  | 292.6212 | 583.2511  | <b>292.1292</b> | 5 |
| 10 | 1010.4248       | 505.7160        | 993.3982  | 497.2027 | 992.4142        | 496.7107 | S | 473.2031        | 237.1052        |           |          | 455.1925  | 228.0999        | 4 |
| 11 | 1067.4462       | 534.2268        | 1050.4197 | 525.7135 | 1049.4357       | 525.2215 | G | 386.1710        | 193.5892        |           |          |           |                 | 3 |
| 12 | 1214.5147       | 607.7610        | 1197.4881 | 599.2477 | 1196.5041       | 598.7557 | F | <b>329.1496</b> | <b>165.0784</b> |           |          |           |                 | 2 |
| 13 |                 |                 |           |          |                 |          | Y | <b>182.0812</b> | 91.5442         |           |          |           |                 | 1 |

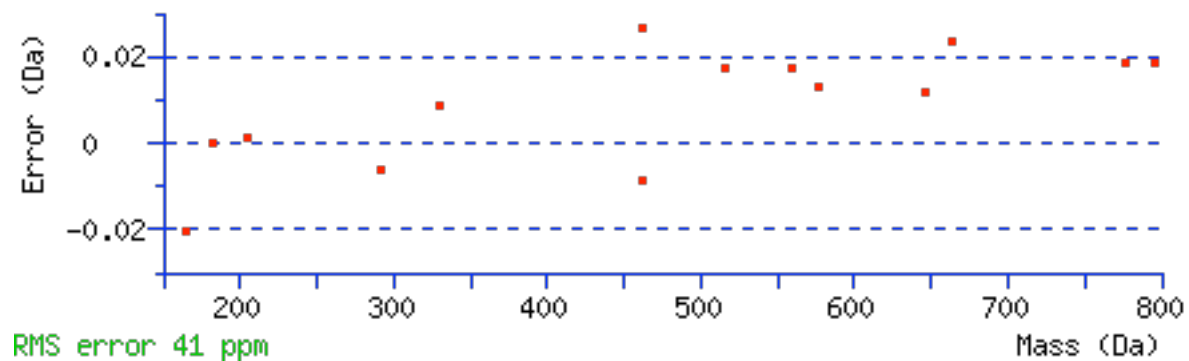

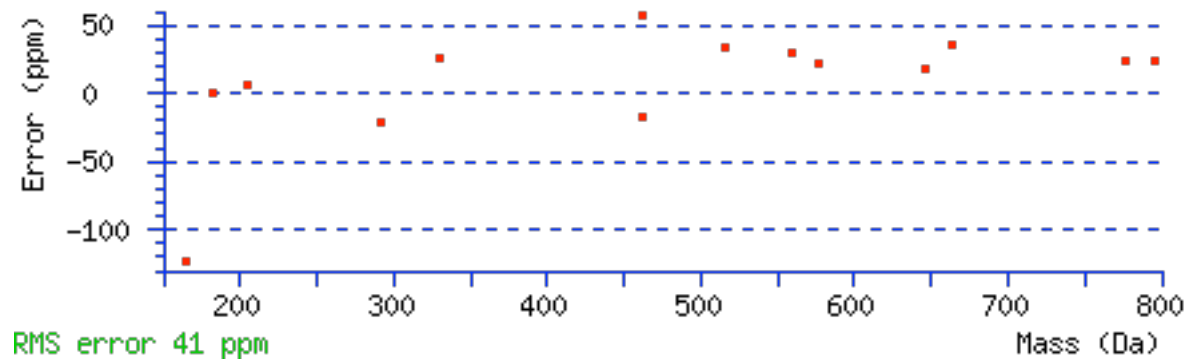

MS/MS Fragmentation of **FGSGSLEPMSSGFY**

Found in **New\_Precursor\_FGGANPEM**, (2 exons, 184 aa), EST(CD294941)

Match to Query 193: 1464.394048 from(733.204300,2+) intensity(465.4211)

Data file Maldi\_All.mgf

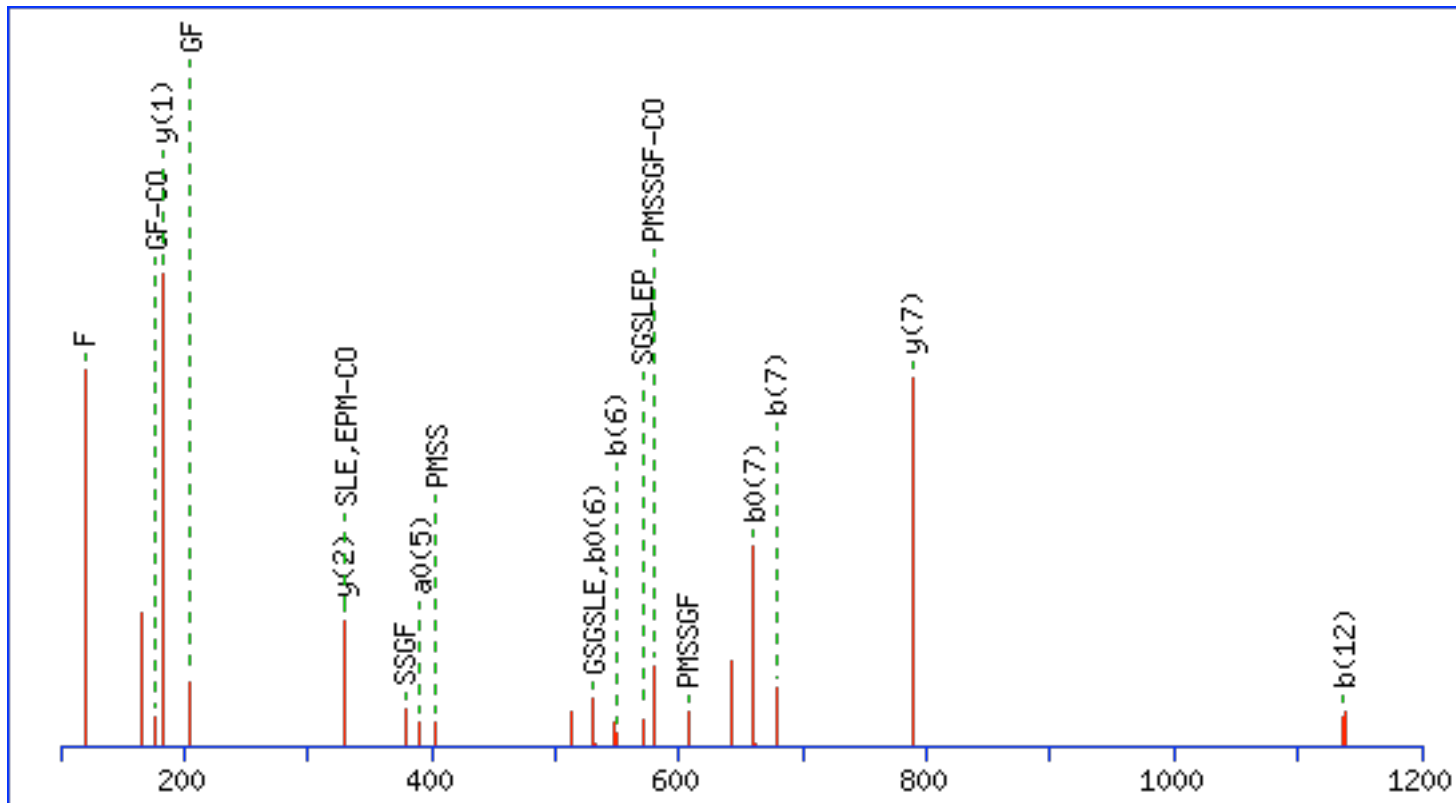

**Monoisotopic mass of neutral peptide Mr(calc): 1464.6231 Ions Score: 24 Expect: 89 Matches (Bold Red): 24/180**  
 fragment ions using 29 most intense peaks

| # | Immon.          | a               | a <sup>0</sup> | b               | b <sup>0</sup> | Seq. | y         | y <sup>0</sup> | #  |
|---|-----------------|-----------------|----------------|-----------------|----------------|------|-----------|----------------|----|
| 1 | <b>120.0808</b> | <b>120.0808</b> |                | 148.0757        |                | F    |           |                | 14 |
| 2 | 30.0338         | <b>177.1022</b> |                | <b>205.0972</b> |                | G    | 1318.5620 | 1300.5514      | 13 |
| 3 | 60.0444         | 264.1343        | 246.1237       | 292.1292        | 274.1186       | S    | 1261.5405 | 1243.5300      | 12 |
| 4 | 30.0338         | 321.1557        | 303.1452       | 349.1506        | 331.1401       | G    | 1174.5085 | 1156.4979      | 11 |

|    |          |           |           |           |           |   |           |           |    |
|----|----------|-----------|-----------|-----------|-----------|---|-----------|-----------|----|
| 5  | 60.0444  | 408.1878  | 390.1772  | 436.1827  | 418.1721  | S | 1117.4870 | 1099.4765 | 10 |
| 6  | 86.0964  | 521.2718  | 503.2613  | 549.2667  | 531.2562  | L | 1030.4550 | 1012.4444 | 9  |
| 7  | 102.0550 | 650.3144  | 632.3039  | 678.3093  | 660.2988  | E | 917.3709  | 899.3604  | 8  |
| 8  | 70.0651  | 747.3672  | 729.3566  | 775.3621  | 757.3515  | P | 788.3284  | 770.3178  | 7  |
| 9  | 104.0528 | 878.4077  | 860.3971  | 906.4026  | 888.3920  | M | 691.2756  | 673.2650  | 6  |
| 10 | 60.0444  | 965.4397  | 947.4291  | 993.4346  | 975.4240  | S | 560.2351  | 542.2245  | 5  |
| 11 | 60.0444  | 1052.4717 | 1034.4612 | 1080.4666 | 1062.4561 | S | 473.2031  | 455.1925  | 4  |
| 12 | 30.0338  | 1109.4932 | 1091.4826 | 1137.4881 | 1119.4775 | G | 386.1710  |           | 3  |
| 13 | 120.0808 | 1256.5616 | 1238.5510 | 1284.5565 | 1266.5459 | F | 329.1496  |           | 2  |
| 14 | 136.0757 |           |           |           |           | Y | 182.0812  |           | 1  |

| Seq    | ya       | yb       | Seq     | ya       | yb       | Seq     | ya       | yb       |
|--------|----------|----------|---------|----------|----------|---------|----------|----------|
| GS     | 117.0659 | 145.0608 | GSG     | 174.0873 | 202.0822 | GSGS    | 261.1193 | 289.1143 |
| GSGSL  | 374.2034 | 402.1983 | GSGSLE  | 503.2460 | 531.2409 | GSGSLEP | 600.2988 | 628.2937 |
| SG     | 117.0659 | 145.0608 | SGS     | 204.0979 | 232.0928 | SGSL    | 317.1819 | 345.1769 |
| SGSLE  | 446.2245 | 474.2195 | SGSLEP  | 543.2773 | 571.2722 | SGSLEPM | 674.3178 | 702.3127 |
| GS     | 117.0659 | 145.0608 | GSL     | 230.1499 | 258.1448 | GSLE    | 359.1925 | 387.1874 |
| GSLEP  | 456.2453 | 484.2402 | GSLEPM  | 587.2858 | 615.2807 | GSLEPMS | 674.3178 | 702.3127 |
| SL     | 173.1285 | 201.1234 | SLE     | 302.1710 | 330.1660 | SLEP    | 399.2238 | 427.2187 |
| SLEPM  | 530.2643 | 558.2592 | SLEPMS  | 617.2963 | 645.2912 | LE      | 215.1390 | 243.1339 |
| LEP    | 312.1918 | 340.1867 | LEPM    | 443.2323 | 471.2272 | LEPMS   | 530.2643 | 558.2592 |
| LEPMSS | 617.2963 | 645.2912 | LEPMSSG | 674.3178 | 702.3127 | EP      | 199.1077 | 227.1026 |
| EPM    | 330.1482 | 358.1431 | EPMS    | 417.1802 | 445.1751 | EPMSS   | 504.2123 | 532.2072 |
| EPMSSG | 561.2337 | 589.2286 | PM      | 201.1056 | 229.1005 | PMS     | 288.1376 | 316.1326 |
| PMSS   | 375.1697 | 403.1646 | PMSSG   | 432.1911 | 460.1860 | PMSSGF  | 579.2595 | 607.2545 |

|              |                 |                 |            |          |          |             |          |          |
|--------------|-----------------|-----------------|------------|----------|----------|-------------|----------|----------|
| <b>MS</b>    | 191.0849        | 219.0798        | <b>MSS</b> | 278.1169 | 306.1118 | <b>MSSG</b> | 335.1384 | 363.1333 |
| <b>MSSGF</b> | 482.2068        | 510.2017        | <b>SS</b>  | 147.0764 | 175.0713 | <b>SSG</b>  | 204.0979 | 232.0928 |
| <b>SSGF</b>  | 351.1663        | <b>379.1612</b> | <b>SG</b>  | 117.0659 | 145.0608 | <b>SGF</b>  | 264.1343 | 292.1292 |
| <b>GF</b>    | <b>177.1022</b> | <b>205.0972</b> |            |          |          |             |          |          |

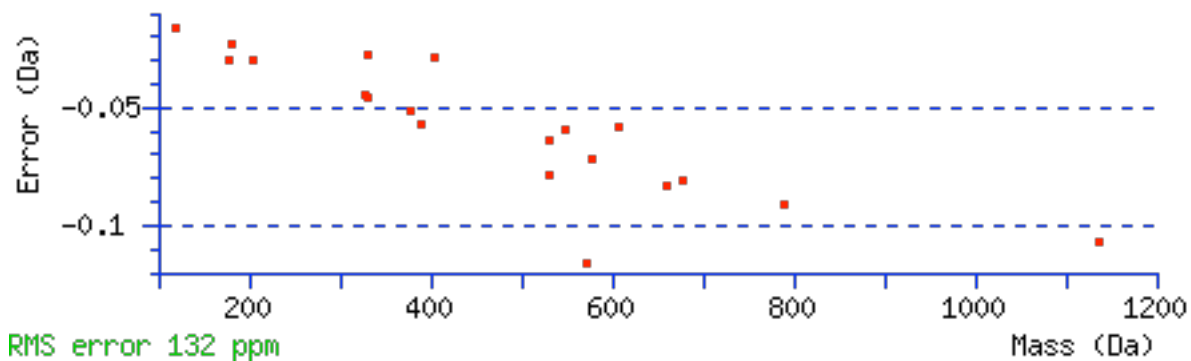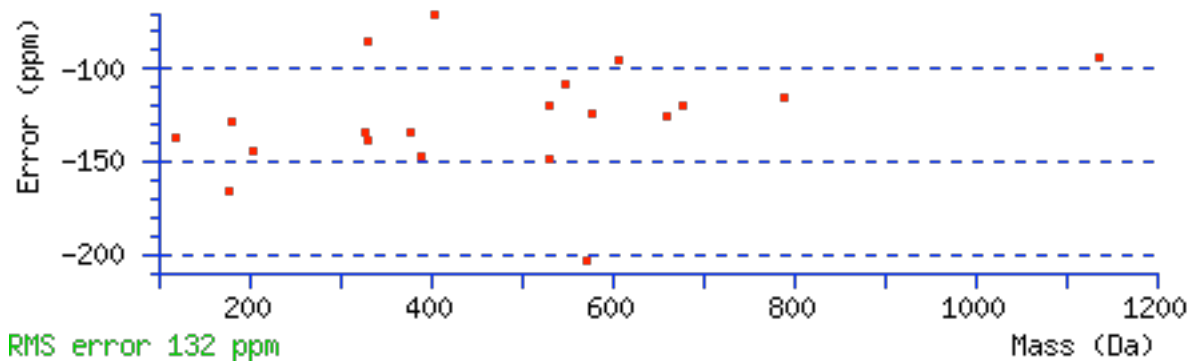

MS/MS Fragmentation of **FGSMNMEPLVSGFY**  
 Found in **New\_Precursor\_FGGANEPM**, (2 exons, 184 aa), EST(CD294941)

Match to Query 284: 1577.417048 from(789.715800,2+) intensity(526.1715)

Data file Maldi\_All.mgf

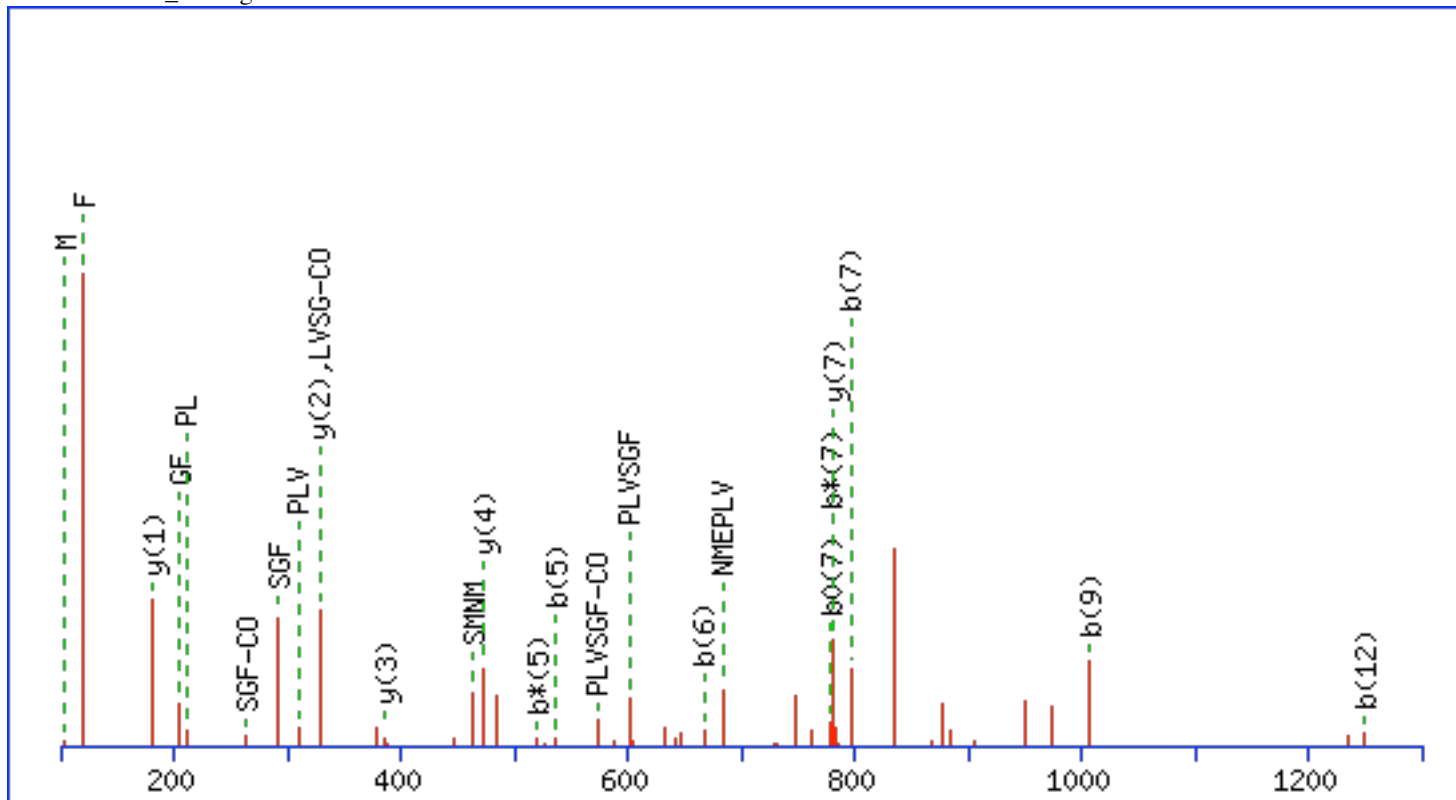

**Monoisotopic mass of neutral peptide Mr(calc): 1577.6894 Ions Score: 45 Expect: 0.82 Matches (Bold Red): 31/197**  
 fragment ions using 41 most intense peaks

| # | Immon.          | a               | a* | a <sup>0</sup> | b               | b* | b <sup>0</sup> | Seq. | y         | y*        | y <sup>0</sup> | #         |
|---|-----------------|-----------------|----|----------------|-----------------|----|----------------|------|-----------|-----------|----------------|-----------|
| 1 | <b>120.0808</b> | <b>120.0808</b> |    |                | 148.0757        |    |                | F    |           |           |                | <b>14</b> |
| 2 | 30.0338         | 177.1022        |    |                | <b>205.0972</b> |    |                | G    | 1431.6283 | 1414.6018 | 1413.6177      | <b>13</b> |

|    |                 |                 |           |           |                  |                 |                 |   |                 |           |           |           |
|----|-----------------|-----------------|-----------|-----------|------------------|-----------------|-----------------|---|-----------------|-----------|-----------|-----------|
| 3  | 60.0444         | <b>264.1343</b> |           | 246.1237  | <b>292.1292</b>  |                 | 274.1186        | S | 1374.6068       | 1357.5803 | 1356.5963 | <b>12</b> |
| 4  | <b>104.0528</b> | 395.1748        |           | 377.1642  | 423.1697         |                 | 405.1591        | M | 1287.5748       | 1270.5483 | 1269.5642 | <b>11</b> |
| 5  | 87.0553         | 509.2177        | 492.1911  | 491.2071  | <b>537.2126</b>  | <b>520.1860</b> | 519.2020        | N | 1156.5343       | 1139.5078 | 1138.5238 | <b>10</b> |
| 6  | <b>104.0528</b> | 640.2582        | 623.2316  | 622.2476  | <b>668.2531</b>  | 651.2265        | 650.2425        | M | 1042.4914       |           | 1024.4808 | <b>9</b>  |
| 7  | 102.0550        | 769.3008        | 752.2742  | 751.2902  | <b>797.2957</b>  | <b>780.2691</b> | <b>779.2851</b> | E | 911.4509        |           | 893.4403  | <b>8</b>  |
| 8  | 70.0651         | 866.3535        | 849.3270  | 848.3430  | 894.3484         | 877.3219        | 876.3379        | P | <b>782.4083</b> |           | 764.3978  | <b>7</b>  |
| 9  | 86.0964         | 979.4376        | 962.4110  | 961.4270  | <b>1007.4325</b> | 990.4060        | 989.4219        | L | 685.3556        |           | 667.3450  | <b>6</b>  |
| 10 | 72.0808         | 1078.5060       | 1061.4795 | 1060.4954 | 1106.5009        | 1089.4744       | 1088.4903       | V | 572.2715        |           | 554.2609  | <b>5</b>  |
| 11 | 60.0444         | 1165.5380       | 1148.5115 | 1147.5275 | 1193.5329        | 1176.5064       | 1175.5224       | S | <b>473.2031</b> |           | 455.1925  | <b>4</b>  |
| 12 | 30.0338         | 1222.5595       | 1205.5329 | 1204.5489 | <b>1250.5544</b> | 1233.5279       | 1232.5438       | G | <b>386.1710</b> |           |           | <b>3</b>  |
| 13 | <b>120.0808</b> | 1369.6279       | 1352.6014 | 1351.6173 | 1397.6228        | 1380.5963       | 1379.6123       | F | <b>329.1496</b> |           |           | <b>2</b>  |
| 14 | 136.0757        |                 |           |           |                  |                 |                 | Y | <b>182.0812</b> |           |           | <b>1</b>  |

| Seq    | ya       | yb       | Seq     | ya       | yb              | Seq    | ya       | yb              |
|--------|----------|----------|---------|----------|-----------------|--------|----------|-----------------|
| GS     | 117.0659 | 145.0608 | GSM     | 248.1063 | 276.1013        | GSMN   | 362.1493 | 390.1442        |
| GSMNM  | 493.1898 | 521.1847 | GSMNME  | 622.2323 | 650.2273        | SM     | 191.0849 | 219.0798        |
| SMN    | 305.1278 | 333.1227 | SMNM    | 436.1683 | <b>464.1632</b> | SMNME  | 565.2109 | 593.2058        |
| SMNMEP | 662.2636 | 690.2586 | MN      | 218.0958 | 246.0907        | MNM    | 349.1363 | 377.1312        |
| MNME   | 478.1789 | 506.1738 | MNMEP   | 575.2316 | 603.2265        | MNMEPL | 688.3157 | 716.3106        |
| NM     | 218.0958 | 246.0907 | NME     | 347.1384 | 375.1333        | NMEP   | 444.1911 | 472.1860        |
| NMEPL  | 557.2752 | 585.2701 | NMEPLV  | 656.3436 | <b>684.3385</b> | ME     | 233.0954 | 261.0904        |
| MEP    | 330.1482 | 358.1431 | MEPL    | 443.2323 | 471.2272        | MEPLV  | 542.3007 | 570.2956        |
| MEPLVS | 629.3327 | 657.3276 | MEPLVSG | 686.3542 | 714.3491        | EP     | 199.1077 | 227.1026        |
| EPL    | 312.1918 | 340.1867 | EPLV    | 411.2602 | 439.2551        | EPLVS  | 498.2922 | 526.2871        |
| EPLVSG | 555.3137 | 583.3086 | PL      | 183.1492 | <b>211.1441</b> | PLV    | 282.2176 | <b>310.2125</b> |



|              |          |                 |              |          |          |               |                 |                 |
|--------------|----------|-----------------|--------------|----------|----------|---------------|-----------------|-----------------|
| <b>PLVS</b>  | 369.2496 | 397.2445        | <b>PLVSG</b> | 426.2711 | 454.2660 | <b>PLVSGF</b> | <b>573.3395</b> | <b>601.3344</b> |
| <b>LV</b>    | 185.1648 | 213.1598        | <b>LVS</b>   | 272.1969 | 300.1918 | <b>LVSG</b>   | <b>329.2183</b> | 357.2132        |
| <b>LVSGF</b> | 476.2867 | 504.2817        | <b>VS</b>    | 159.1128 | 187.1077 | <b>VSG</b>    | 216.1343        | 244.1292        |
| <b>VSGF</b>  | 363.2027 | 391.1976        | <b>SG</b>    | 117.0659 | 145.0608 | <b>SGF</b>    | <b>264.1343</b> | <b>292.1292</b> |
| <b>GF</b>    | 177.1022 | <b>205.0972</b> |              |          |          |               |                 |                 |

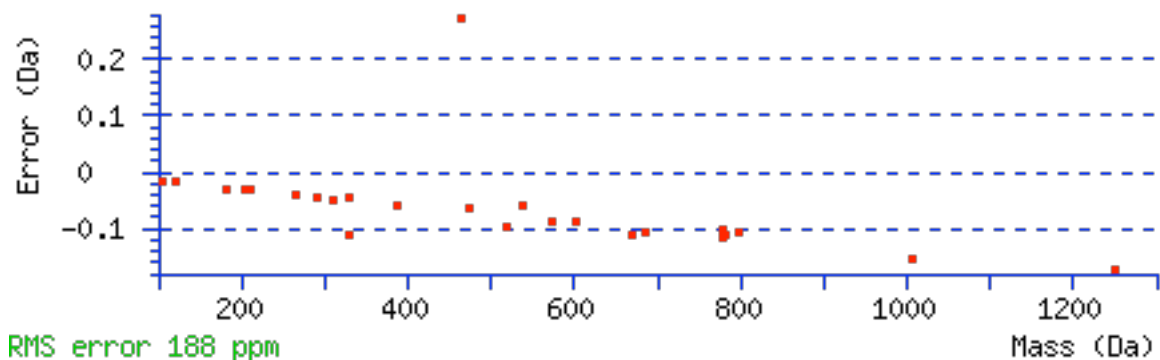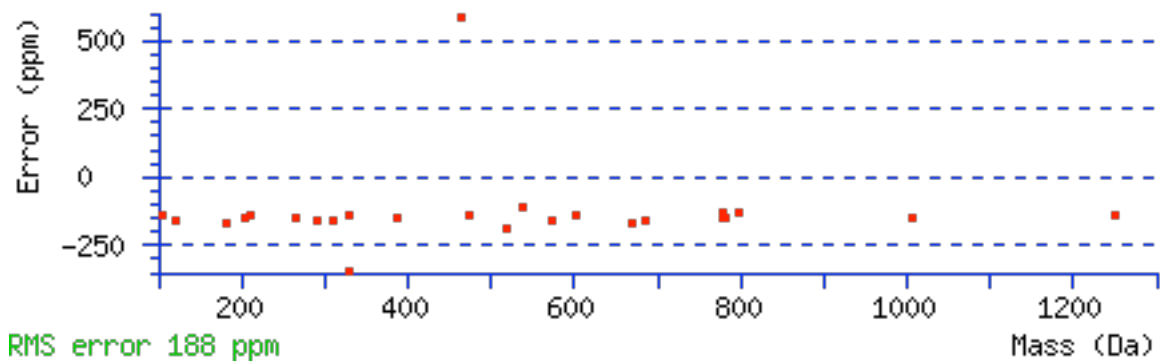

MS/MS Fragmentation of **LPIEDKDGLDIEDQE**

Found in **New\_Precursor\_FGGANEPM**, (2 exons, 184 aa), EST(CD294941)

Match to Query 707: 1727.858188 from(864.936370,2+) intensity(439580.0000)

Title: Cmpd 148, +MSn(865.4518), 28.4 min

Data file Qtof\_all.mgf

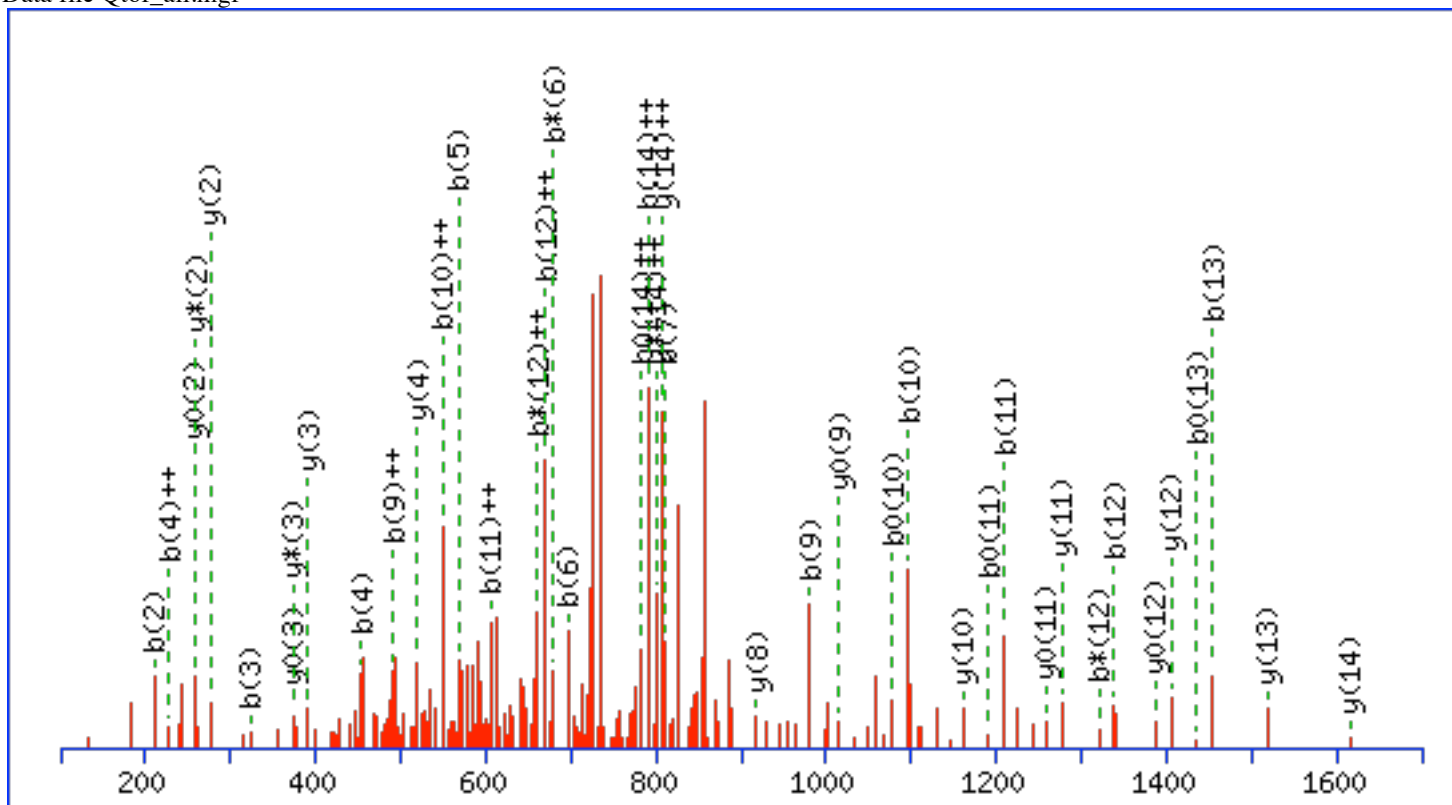

**Monoisotopic mass of neutral peptide Mr(calc): 1727.8101 Ions Score: 54 Expect: 0.046 Matches (Bold Red): 42/150**  
 fragment ions using 89 most intense peaks

| # | b | b <sup>++</sup> | b <sup>*</sup> | b <sup>***</sup> | b <sup>0</sup> | b <sup>0++</sup> | Seq. | y | y <sup>++</sup> | y <sup>*</sup> | y <sup>***</sup> | y <sup>0</sup> | y <sup>0++</sup> | # |
|---|---|-----------------|----------------|------------------|----------------|------------------|------|---|-----------------|----------------|------------------|----------------|------------------|---|
|---|---|-----------------|----------------|------------------|----------------|------------------|------|---|-----------------|----------------|------------------|----------------|------------------|---|

|    |           |          |           |          |           |          |  |   |           |          |           |          |           |          |    |
|----|-----------|----------|-----------|----------|-----------|----------|--|---|-----------|----------|-----------|----------|-----------|----------|----|
| 1  | 114.0913  | 57.5493  |           |          |           |          |  | L |           |          |           |          |           |          | 15 |
| 2  | 211.1441  | 106.0757 |           |          |           |          |  | P | 1615.7334 | 808.3703 | 1598.7068 | 799.8570 | 1597.7228 | 799.3650 | 14 |
| 3  | 324.2282  | 162.6177 |           |          |           |          |  | I | 1518.6806 | 759.8439 | 1501.6540 | 751.3307 | 1500.6700 | 750.8387 | 13 |
| 4  | 453.2708  | 227.1390 |           |          | 435.2602  | 218.1337 |  | E | 1405.5965 | 703.3019 | 1388.5700 | 694.7886 | 1387.5860 | 694.2966 | 12 |
| 5  | 568.2977  | 284.6525 |           |          | 550.2871  | 275.6472 |  | D | 1276.5539 | 638.7806 | 1259.5274 | 630.2673 | 1258.5434 | 629.7753 | 11 |
| 6  | 696.3927  | 348.7000 | 679.3661  | 340.1867 | 678.3821  | 339.6947 |  | K | 1161.5270 | 581.2671 | 1144.5004 | 572.7539 | 1143.5164 | 572.2618 | 10 |
| 7  | 811.4196  | 406.2134 | 794.3931  | 397.7002 | 793.4090  | 397.2082 |  | D | 1033.4320 | 517.2197 | 1016.4055 | 508.7064 | 1015.4215 | 508.2144 | 9  |
| 8  | 868.4411  | 434.7242 | 851.4145  | 426.2109 | 850.4305  | 425.7189 |  | G | 918.4051  | 459.7062 | 901.3785  | 451.1929 | 900.3945  | 450.7009 | 8  |
| 9  | 981.5251  | 491.2662 | 964.4986  | 482.7529 | 963.5146  | 482.2609 |  | L | 861.3836  | 431.1954 | 844.3571  | 422.6822 | 843.3731  | 422.1902 | 7  |
| 10 | 1096.5521 | 548.7797 | 1079.5255 | 540.2664 | 1078.5415 | 539.7744 |  | D | 748.2996  | 374.6534 | 731.2730  | 366.1401 | 730.2890  | 365.6481 | 6  |
| 11 | 1209.6361 | 605.3217 | 1192.6096 | 596.8084 | 1191.6256 | 596.3164 |  | I | 633.2726  | 317.1399 | 616.2461  | 308.6267 | 615.2620  | 308.1347 | 5  |
| 12 | 1338.6787 | 669.8430 | 1321.6522 | 661.3297 | 1320.6682 | 660.8377 |  | E | 520.1885  | 260.5979 | 503.1620  | 252.0846 | 502.1780  | 251.5926 | 4  |
| 13 | 1453.7057 | 727.3565 | 1436.6791 | 718.8432 | 1435.6951 | 718.3512 |  | D | 391.1460  | 196.0766 | 374.1194  | 187.5633 | 373.1354  | 187.0713 | 3  |
| 14 | 1581.7643 | 791.3858 | 1564.7377 | 782.8725 | 1563.7537 | 782.3805 |  | Q | 276.1190  | 138.5631 | 259.0925  | 130.0499 | 258.1084  | 129.5579 | 2  |
| 15 |           |          |           |          |           |          |  | E | 148.0604  | 74.5339  |           |          | 130.0499  | 65.5286  | 1  |

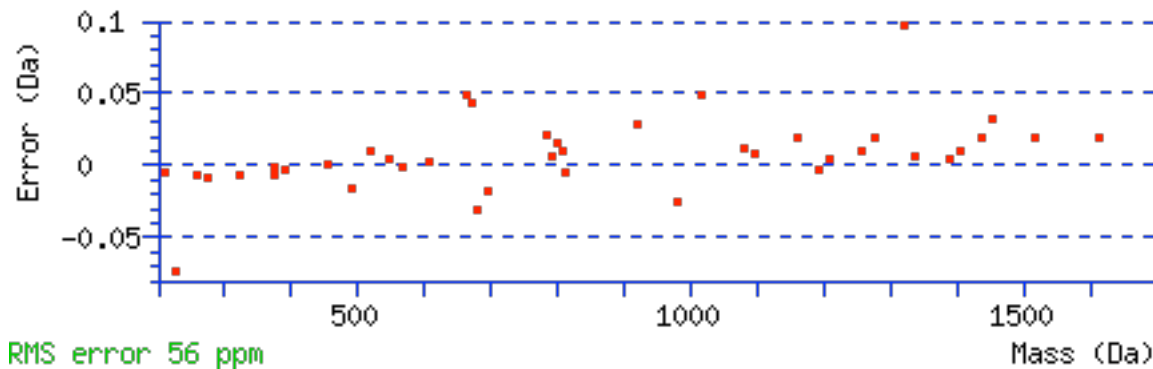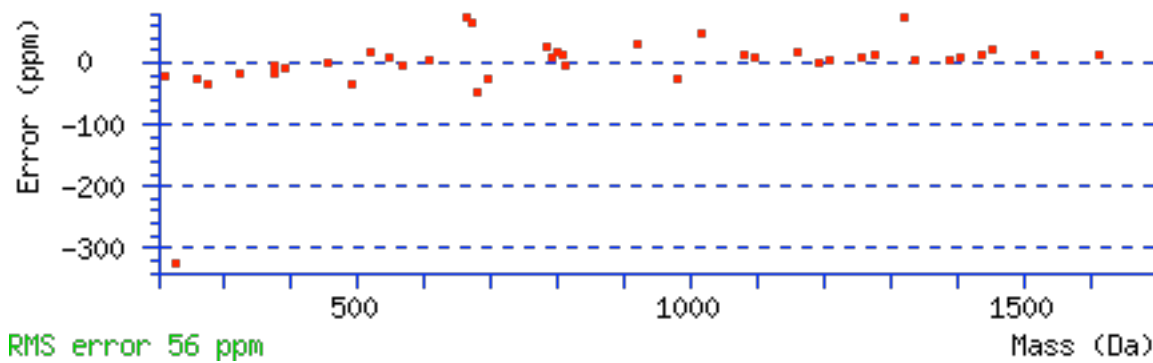

MS/MS Fragmentation of **LPIEDKDGLDIEDQEE**  
Found in **New\_Precursor\_FGGANEPM**, (2 exons, 184 aa), EST(CD294941)  
Match to Query 732: 1856.876468 from(929.445510,2+) intensity(325208.0000)  
Title: Cmpd 149, +MSn(929.8602), 28.5 min  
Data file Qtof\_all.mgf

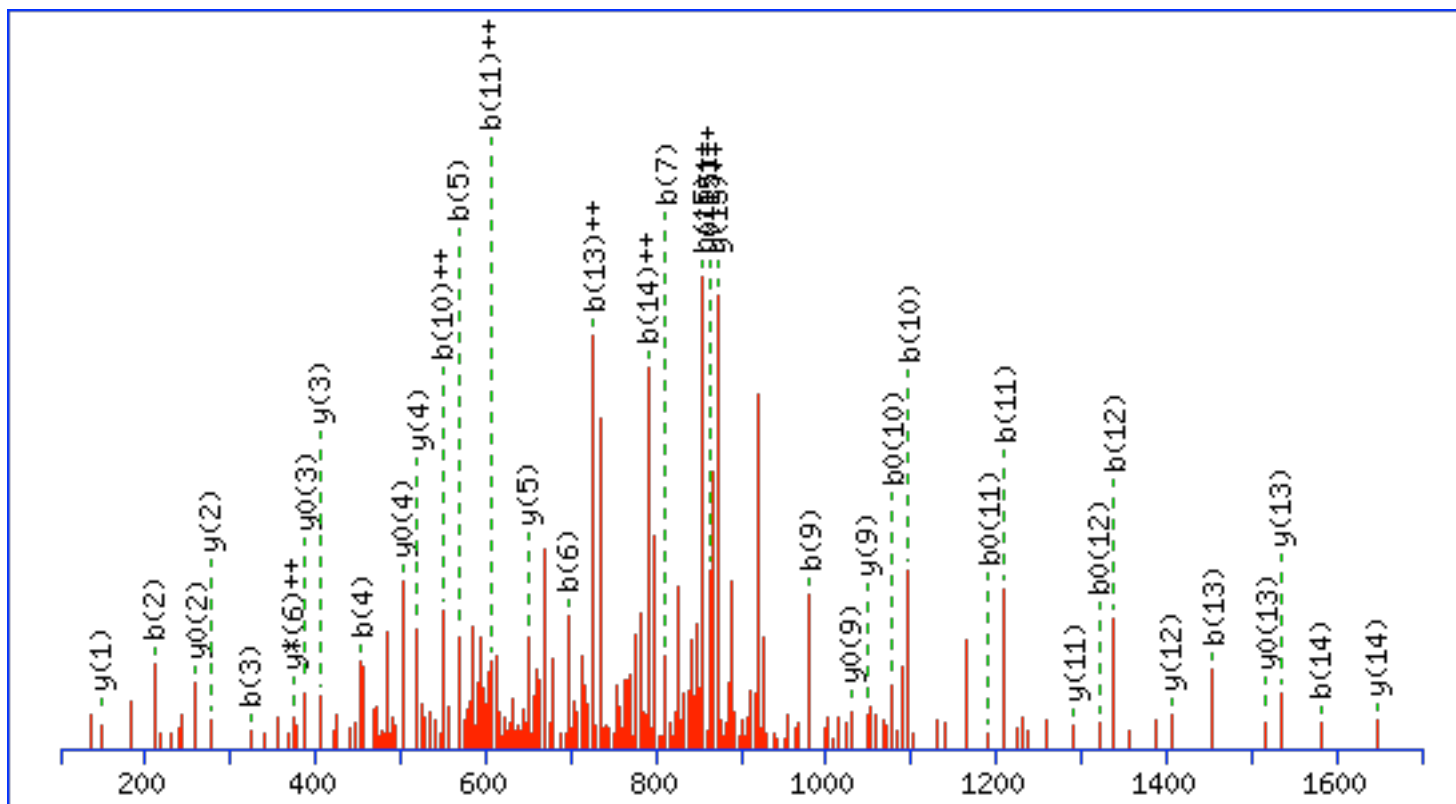

**Monoisotopic mass of neutral peptide Mr(calc): 1856.8527 Ions Score: 64 Expect: 0.0045 Matches (Bold Red): 38/160**  
 fragment ions using 81 most intense peaks

| # | b               | b <sup>++</sup> | b <sup>*</sup> | b <sup>*++</sup> | b <sup>0</sup> | b <sup>0++</sup> | Seq. | y                | y <sup>++</sup> | y <sup>*</sup> | y <sup>*++</sup> | y <sup>0</sup>   | y <sup>0++</sup> | #  |
|---|-----------------|-----------------|----------------|------------------|----------------|------------------|------|------------------|-----------------|----------------|------------------|------------------|------------------|----|
| 1 | 114.0913        | 57.5493         |                |                  |                |                  | L    |                  |                 |                |                  |                  |                  | 16 |
| 2 | <b>211.1441</b> | 106.0757        |                |                  |                |                  | P    | 1744.7759        | <b>872.8916</b> | 1727.7494      | 864.3783         | 1726.7654        | <b>863.8863</b>  | 15 |
| 3 | <b>324.2282</b> | 162.6177        |                |                  |                |                  | I    | <b>1647.7232</b> | 824.3652        | 1630.6966      | 815.8520         | 1629.7126        | 815.3599         | 14 |
| 4 | <b>453.2708</b> | 227.1390        |                |                  | 435.2602       | 218.1337         | E    | <b>1534.6391</b> | 767.8232        | 1517.6126      | 759.3099         | <b>1516.6286</b> | 758.8179         | 13 |

|    |                  |                 |           |          |                  |          |   |                  |          |           |                 |                  |          |           |
|----|------------------|-----------------|-----------|----------|------------------|----------|---|------------------|----------|-----------|-----------------|------------------|----------|-----------|
| 5  | <b>568.2977</b>  | 284.6525        |           |          | 550.2871         | 275.6472 | D | <b>1405.5965</b> | 703.3019 | 1388.5700 | 694.7886        | 1387.5860        | 694.2966 | <b>12</b> |
| 6  | <b>696.3927</b>  | 348.7000        | 679.3661  | 340.1867 | 678.3821         | 339.6947 | K | <b>1290.5696</b> | 645.7884 | 1273.5430 | 637.2752        | 1272.5590        | 636.7831 | <b>11</b> |
| 7  | <b>811.4196</b>  | 406.2134        | 794.3931  | 397.7002 | 793.4090         | 397.2082 | D | 1162.4746        | 581.7409 | 1145.4481 | 573.2277        | 1144.4641        | 572.7357 | <b>10</b> |
| 8  | 868.4411         | 434.7242        | 851.4145  | 426.2109 | 850.4305         | 425.7189 | G | <b>1047.4477</b> | 524.2275 | 1030.4211 | 515.7142        | <b>1029.4371</b> | 515.2222 | <b>9</b>  |
| 9  | <b>981.5251</b>  | 491.2662        | 964.4986  | 482.7529 | 963.5146         | 482.2609 | L | 990.4262         | 495.7167 | 973.3997  | 487.2035        | 972.4156         | 486.7115 | <b>8</b>  |
| 10 | <b>1096.5521</b> | <b>548.7797</b> | 1079.5255 | 540.2664 | <b>1078.5415</b> | 539.7744 | D | 877.3421         | 439.1747 | 860.3156  | 430.6614        | 859.3316         | 430.1694 | <b>7</b>  |
| 11 | <b>1209.6361</b> | <b>605.3217</b> | 1192.6096 | 596.8084 | <b>1191.6256</b> | 596.3164 | I | 762.3152         | 381.6612 | 745.2887  | <b>373.1480</b> | 744.3046         | 372.6560 | <b>6</b>  |
| 12 | <b>1338.6787</b> | 669.8430        | 1321.6522 | 661.3297 | <b>1320.6682</b> | 660.8377 | E | <b>649.2311</b>  | 325.1192 | 632.2046  | 316.6059        | 631.2206         | 316.1139 | <b>5</b>  |
| 13 | <b>1453.7057</b> | <b>727.3565</b> | 1436.6791 | 718.8432 | 1435.6951        | 718.3512 | D | <b>520.1885</b>  | 260.5979 | 503.1620  | 252.0846        | <b>502.1780</b>  | 251.5926 | <b>4</b>  |
| 14 | <b>1581.7643</b> | <b>791.3858</b> | 1564.7377 | 782.8725 | 1563.7537        | 782.3805 | Q | <b>405.1616</b>  | 203.0844 | 388.1351  | 194.5712        | <b>387.1510</b>  | 194.0792 | <b>3</b>  |
| 15 | 1710.8069        | <b>855.9071</b> | 1693.7803 | 847.3938 | 1692.7963        | 846.9018 | E | <b>277.1030</b>  | 139.0552 |           |                 | <b>259.0925</b>  | 130.0499 | <b>2</b>  |
| 16 |                  |                 |           |          |                  |          | E | <b>148.0604</b>  | 74.5339  |           |                 | 130.0499         | 65.5286  | <b>1</b>  |

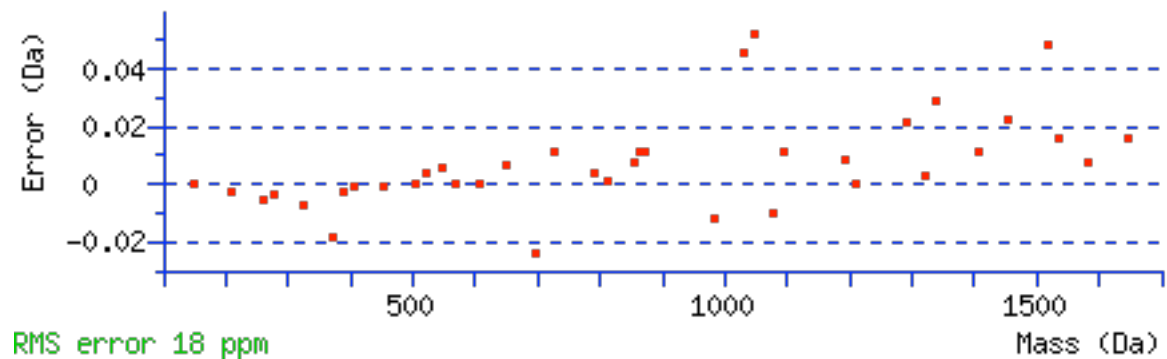

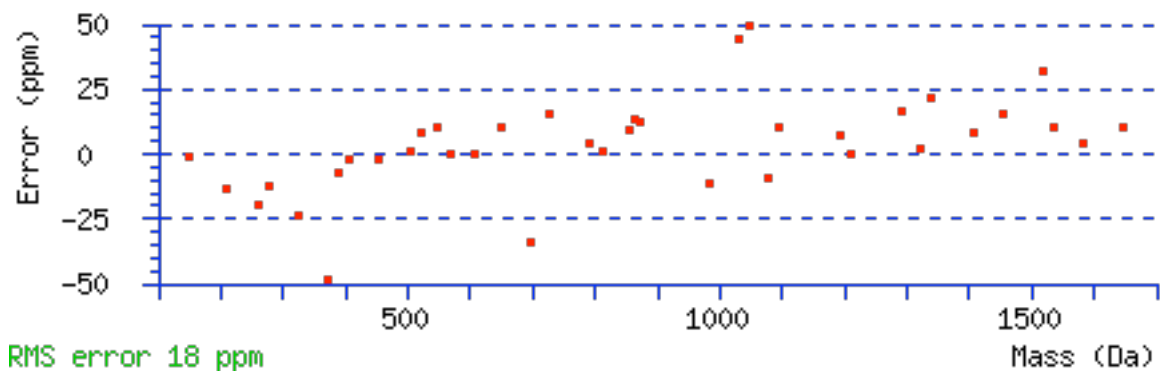

MS/MS Fragmentation of **LPIEDKDGLDIEDQEEAE**

Found in **New\_Precursor\_FGGANPEM**, (2 exons, 184 aa), EST(CD294941)

Match to Query 782: 2056.962668 from(1029.488610,2+) intensity(309452.0000)

Title: Cmpd 159, +MSn(1030.1290), 28.6 min

Data file Qtof\_all.mgf

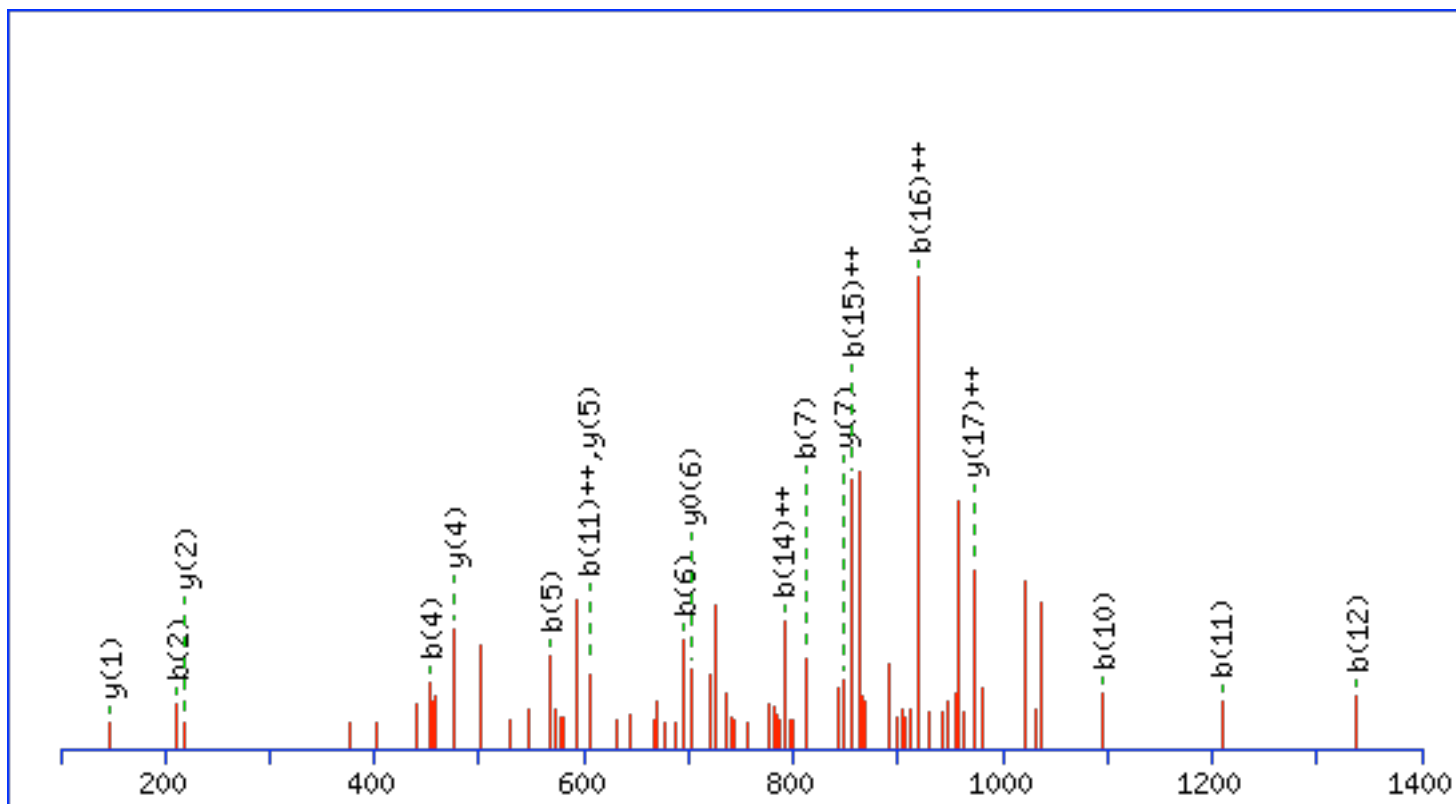

**Monoisotopic mass of neutral peptide Mr(calc): 2056.9324 Ions Score: 54 Expect: 0.039 Matches (Bold Red): 19/180**  
 fragment ions using 30 most intense peaks

| # | b               | b <sup>++</sup> | b <sup>*</sup> | b <sup>***</sup> | b <sup>0</sup> | b <sup>0++</sup> | Seq. | y         | y <sup>++</sup> | y <sup>*</sup> | y <sup>***</sup> | y <sup>0</sup> | y <sup>0++</sup> | #  |
|---|-----------------|-----------------|----------------|------------------|----------------|------------------|------|-----------|-----------------|----------------|------------------|----------------|------------------|----|
| 1 | 114.0913        | 57.5493         |                |                  |                |                  | L    |           |                 |                |                  |                |                  | 18 |
| 2 | <b>211.1441</b> | 106.0757        |                |                  |                |                  | P    | 1944.8557 | <b>972.9315</b> | 1927.8291      | 964.4182         | 1926.8451      | 963.9262         | 17 |
| 3 | 324.2282        | 162.6177        |                |                  |                |                  | I    | 1847.8029 | 924.4051        | 1830.7763      | 915.8918         | 1829.7923      | 915.3998         | 16 |
| 4 | <b>453.2708</b> | 227.1390        |                |                  | 435.2602       | 218.1337         | E    | 1734.7188 | 867.8631        | 1717.6923      | 859.3498         | 1716.7083      | 858.8578         | 15 |



|    |                  |                 |           |          |           |          |   |                 |          |           |          |                 |          |    |
|----|------------------|-----------------|-----------|----------|-----------|----------|---|-----------------|----------|-----------|----------|-----------------|----------|----|
| 5  | <b>568.2977</b>  | 284.6525        |           |          | 550.2871  | 275.6472 | D | 1605.6762       | 803.3418 | 1588.6497 | 794.8285 | 1587.6657       | 794.3365 | 14 |
| 6  | <b>696.3927</b>  | 348.7000        | 679.3661  | 340.1867 | 678.3821  | 339.6947 | K | 1490.6493       | 745.8283 | 1473.6227 | 737.3150 | 1472.6387       | 736.8230 | 13 |
| 7  | <b>811.4196</b>  | 406.2134        | 794.3931  | 397.7002 | 793.4090  | 397.2082 | D | 1362.5543       | 681.7808 | 1345.5278 | 673.2675 | 1344.5438       | 672.7755 | 12 |
| 8  | 868.4411         | 434.7242        | 851.4145  | 426.2109 | 850.4305  | 425.7189 | G | 1247.5274       | 624.2673 | 1230.5008 | 615.7541 | 1229.5168       | 615.2620 | 11 |
| 9  | 981.5251         | 491.2662        | 964.4986  | 482.7529 | 963.5146  | 482.2609 | L | 1190.5059       | 595.7566 | 1173.4794 | 587.2433 | 1172.4954       | 586.7513 | 10 |
| 10 | <b>1096.5521</b> | 548.7797        | 1079.5255 | 540.2664 | 1078.5415 | 539.7744 | D | 1077.4219       | 539.2146 | 1060.3953 | 530.7013 | 1059.4113       | 530.2093 | 9  |
| 11 | <b>1209.6361</b> | <b>605.3217</b> | 1192.6096 | 596.8084 | 1191.6256 | 596.3164 | I | 962.3949        | 481.7011 | 945.3684  | 473.1878 | 944.3843        | 472.6958 | 8  |
| 12 | <b>1338.6787</b> | 669.8430        | 1321.6522 | 661.3297 | 1320.6682 | 660.8377 | E | <b>849.3108</b> | 425.1591 | 832.2843  | 416.6458 | 831.3003        | 416.1538 | 7  |
| 13 | 1453.7057        | 727.3565        | 1436.6791 | 718.8432 | 1435.6951 | 718.3512 | D | 720.2683        | 360.6378 | 703.2417  | 352.1245 | <b>702.2577</b> | 351.6325 | 6  |
| 14 | 1581.7643        | <b>791.3858</b> | 1564.7377 | 782.8725 | 1563.7537 | 782.3805 | Q | <b>605.2413</b> | 303.1243 | 588.2148  | 294.6110 | 587.2307        | 294.1190 | 5  |
| 15 | 1710.8069        | <b>855.9071</b> | 1693.7803 | 847.3938 | 1692.7963 | 846.9018 | E | <b>477.1827</b> | 239.0950 |           |          | 459.1722        | 230.0897 | 4  |
| 16 | 1839.8494        | <b>920.4284</b> | 1822.8229 | 911.9151 | 1821.8389 | 911.4231 | E | 348.1401        | 174.5737 |           |          | 330.1296        | 165.5684 | 3  |
| 17 | 1910.8866        | 955.9469        | 1893.8600 | 947.4336 | 1892.8760 | 946.9416 | A | <b>219.0975</b> | 110.0524 |           |          | 201.0870        | 101.0471 | 2  |
| 18 |                  |                 |           |          |           |          | E | <b>148.0604</b> | 74.5339  |           |          | 130.0499        | 65.5286  | 1  |

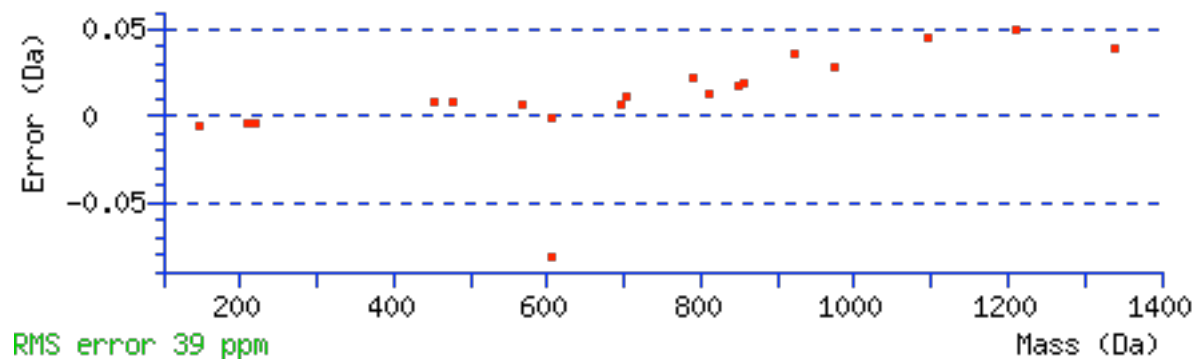

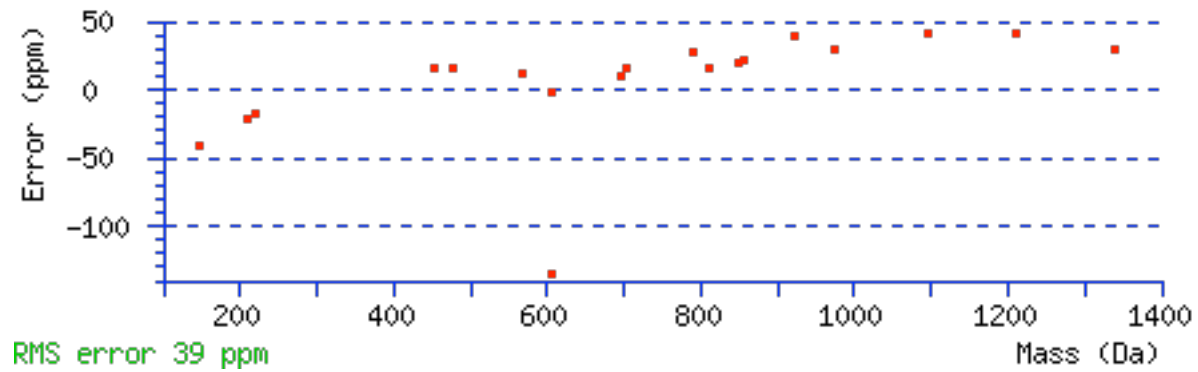

MS/MS Fragmentation of **GYPRNSVVADPVL**

Found in **New\_Precursor\_GYPRNSVV**, (2 exons, 135 aa), No EST

Match to Query 150: 1385.435848 from(693.725200,2+) intensity(42.6727)

Data file Maldi\_All.mgf

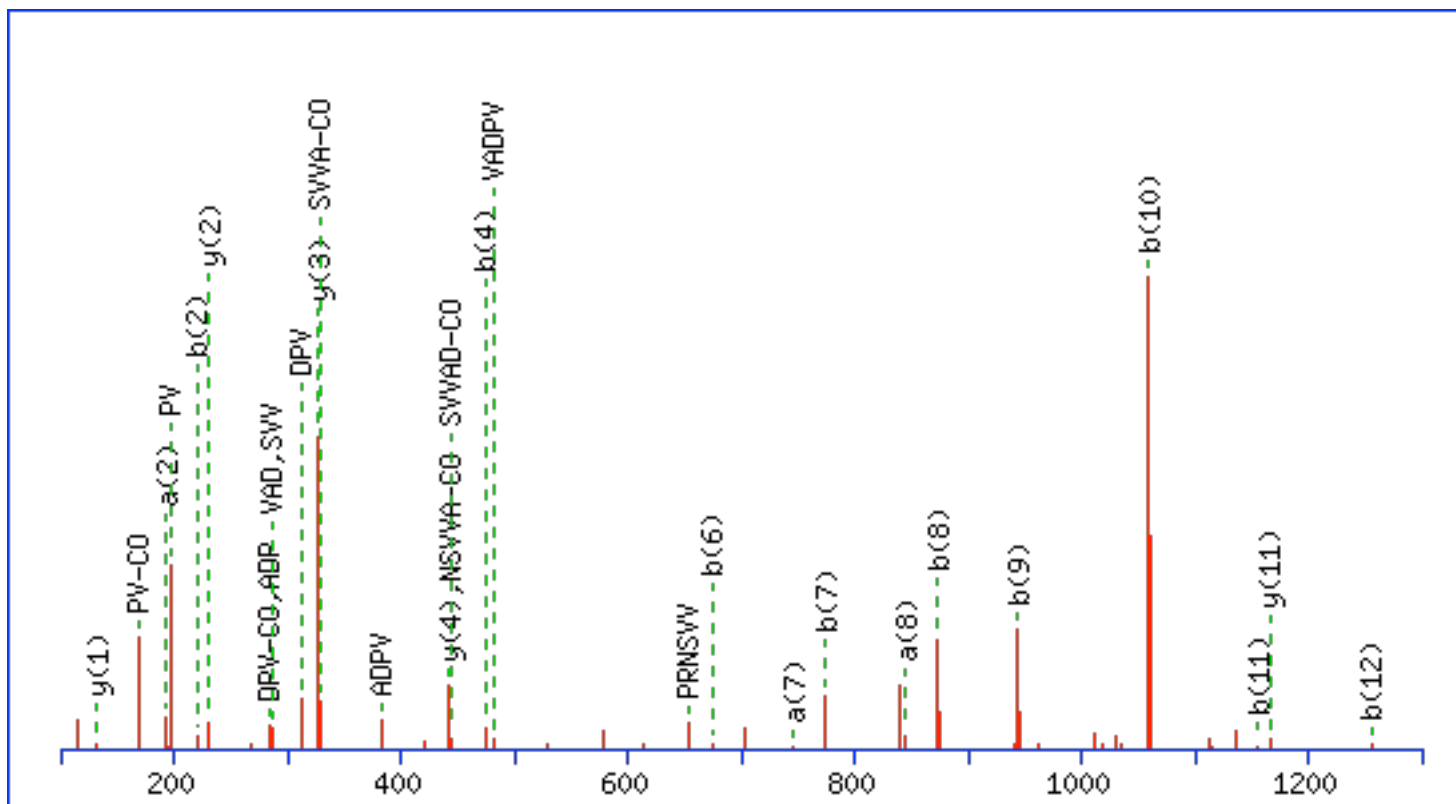

**Monoisotopic mass of neutral peptide Mr(calc): 1385.7303 Ions Score: 57 Expect: 0.04 Matches (Bold Red): 32/191**  
 fragment ions using 50 most intense peaks

| # | Immon.   | a               | a*       | a <sup>0</sup> | b               | b*       | b <sup>0</sup> | d        | Seq. | v         | w         | y                | y*        | y <sup>0</sup> | #  |
|---|----------|-----------------|----------|----------------|-----------------|----------|----------------|----------|------|-----------|-----------|------------------|-----------|----------------|----|
| 1 | 30.0338  | 30.0338         |          |                | 58.0287         |          |                |          | G    |           |           |                  |           |                | 13 |
| 2 | 136.0757 | <b>193.0972</b> |          |                | <b>221.0921</b> |          |                |          | Y    | 1221.6586 |           | 1329.7161        | 1312.6896 | 1311.7056      | 12 |
| 3 | 70.0651  | 290.1499        |          |                | 318.1448        |          |                |          | P    | 1124.6058 | 1123.6106 | <b>1166.6528</b> | 1149.6262 | 1148.6422      | 11 |
| 4 | 129.1135 | 446.2510        | 429.2245 |                | <b>474.2459</b> | 457.2194 |                | 361.1870 | R    | 968.5047  | 967.5095  | 1069.6000        | 1052.5735 | 1051.5895      | 10 |

|    |         |                 |           |           |                  |           |           |           |   |  |  |                 |          |          |   |
|----|---------|-----------------|-----------|-----------|------------------|-----------|-----------|-----------|---|--|--|-----------------|----------|----------|---|
| 5  | 87.0553 | 560.2940        | 543.2674  |           | 588.2889         | 571.2623  |           | 517.2881  | N |  |  | 913.4989        | 896.4724 | 895.4884 | 9 |
| 6  | 60.0444 | 647.3260        | 630.2994  | 629.3154  | <b>675.3209</b>  | 658.2944  | 657.3103  | 631.3311  | S |  |  | 799.4560        |          | 781.4454 | 8 |
| 7  | 72.0808 | <b>746.3944</b> | 729.3678  | 728.3838  | <b>774.3893</b>  | 757.3628  | 756.3787  | 732.3787  | V |  |  | 712.4240        |          | 694.4134 | 7 |
| 8  | 72.0808 | <b>845.4628</b> | 828.4363  | 827.4522  | <b>873.4577</b>  | 856.4312  | 855.4472  | 831.4472  | V |  |  | 613.3556        |          | 595.3450 | 6 |
| 9  | 44.0495 | 916.4999        | 899.4734  | 898.4894  | <b>944.4948</b>  | 927.4683  | 926.4843  |           | A |  |  | 514.2871        |          | 496.2766 | 5 |
| 10 | 88.0393 | 1031.5269       | 1014.5003 | 1013.5163 | <b>1059.5218</b> | 1042.4952 | 1041.5112 | 987.5370  | D |  |  | <b>443.2500</b> |          | 425.2395 | 4 |
| 11 | 70.0651 | 1128.5796       | 1111.5531 | 1110.5691 | <b>1156.5745</b> | 1139.5480 | 1138.5640 | 1102.5640 | P |  |  | <b>328.2231</b> |          |          | 3 |
| 12 | 72.0808 | 1227.6480       | 1210.6215 | 1209.6375 | <b>1255.6430</b> | 1238.6164 | 1237.6324 | 1213.6324 | V |  |  | <b>231.1703</b> |          |          | 2 |
| 13 | 86.0964 |                 |           |           |                  |           |           |           | L |  |  | <b>132.1019</b> |          |          | 1 |

| Seq     | ya              | yb              | Seq     | ya              | yb              | Seq    | ya              | yb              |
|---------|-----------------|-----------------|---------|-----------------|-----------------|--------|-----------------|-----------------|
| YP      | 233.1285        | 261.1234        | YPR     | 389.2296        | 417.2245        | YPRN   | 503.2725        | 531.2674        |
| YPRNS   | 590.3045        | 618.2994        | YPRNSV  | 689.3729        | 717.3678        | PR     | 226.1662        | 254.1612        |
| PRN     | 340.2092        | 368.2041        | PRNS    | 427.2412        | 455.2361        | PRNSV  | 526.3096        | 554.3045        |
| PRNSVV  | 625.3780        | <b>653.3729</b> | PRNSVVA | 696.4151        | 724.4100        | RN     | 243.1564        | 271.1513        |
| RNS     | 330.1884        | 358.1833        | RNSV    | 429.2568        | 457.2518        | RNSVV  | 528.3253        | 556.3202        |
| RNSVVA  | 599.3624        | 627.3573        | NS      | 174.0873        | 202.0822        | NSV    | 273.1557        | 301.1506        |
| NSVV    | 372.2241        | 400.2191        | NSVVA   | <b>443.2613</b> | 471.2562        | NSVVAD | 558.2882        | 586.2831        |
| NSVVADP | 655.3410        | 683.3359        | SV      | 159.1128        | 187.1077        | SVV    | 258.1812        | <b>286.1761</b> |
| SVVA    | <b>329.2183</b> | 357.2132        | SVVAD   | <b>444.2453</b> | 472.2402        | SVVADP | 541.2980        | 569.2930        |
| SVVADPV | 640.3665        | 668.3614        | VV      | 171.1492        | 199.1441        | VVA    | 242.1863        | 270.1812        |
| VVAD    | 357.2132        | 385.2082        | VVADP   | 454.2660        | <b>482.2609</b> | VVADPV | 553.3344        | 581.3293        |
| VA      | 143.1179        | 171.1128        | VAD     | 258.1448        | <b>286.1397</b> | VADP   | 355.1976        | <b>383.1925</b> |
| VADPV   | 454.2660        | <b>482.2609</b> | AD      | 159.0764        | 187.0713        | ADP    | 256.1292        | <b>284.1241</b> |
| ADPV    | 355.1976        | <b>383.1925</b> | DP      | 185.0921        | 213.0870        | DPV    | <b>284.1605</b> | <b>312.1554</b> |

|    |          |          |  |  |  |  |  |  |
|----|----------|----------|--|--|--|--|--|--|
| PV | 169.1335 | 197.1285 |  |  |  |  |  |  |
|----|----------|----------|--|--|--|--|--|--|

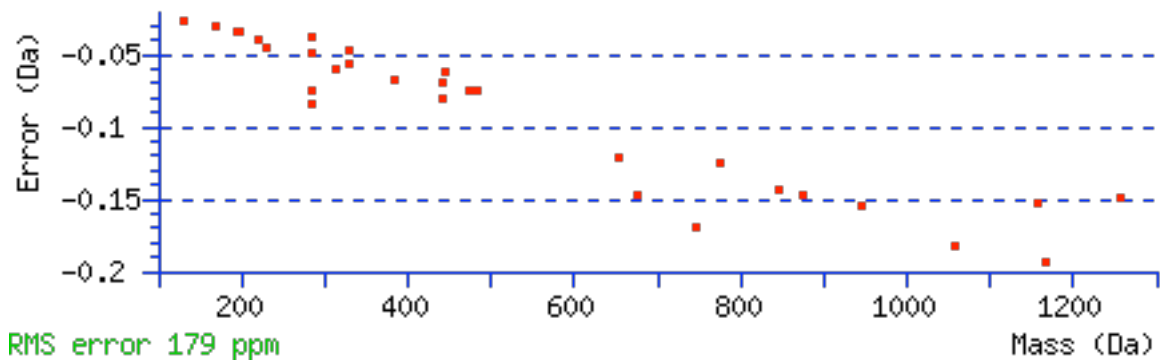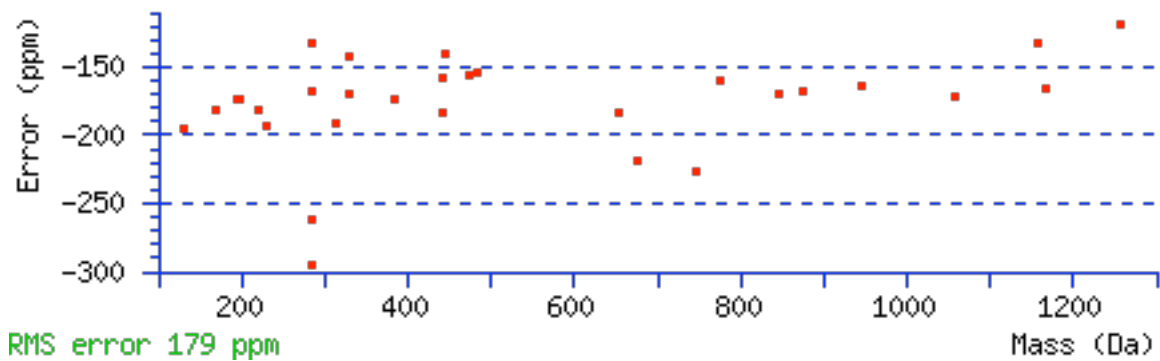

MS/MS Fragmentation of **DAGPHAWYGTGMF**  
 Found in **New\_Precursor\_DAGPAWYG**, (2 exons, 235 aa), No EST  
 Match to Query 164: 1407.338448 from(704.676500,2+) intensity(288.4586)  
 Data file Maldi\_All.mgf

**Monoisotopic mass of neutral peptide Mr(calc):** 1407.6030 **Variable modifications:** C-term : Amidated (C-term) **Ions Score:** 40 **Expect:** 2.4 **Matches (Bold Red):** 11/159 fragment ions using 16 most intense peaks

| #  | Immon.   | a         | a <sup>0</sup> | b         | b <sup>0</sup> | Seq. | y         | y <sup>0</sup> | #  |
|----|----------|-----------|----------------|-----------|----------------|------|-----------|----------------|----|
| 1  | 88.0393  | 88.0393   | 70.0287        | 116.0342  | 98.0237        | D    |           |                | 13 |
| 2  | 44.0495  | 159.0764  | 141.0659       | 187.0713  | 169.0608       | A    | 1293.5833 | 1275.5728      | 12 |
| 3  | 30.0338  | 216.0979  | 198.0873       | 244.0928  | 226.0822       | G    | 1222.5462 | 1204.5357      | 11 |
| 4  | 70.0651  | 313.1506  | 295.1401       | 341.1456  | 323.1350       | P    | 1165.5248 | 1147.5142      | 10 |
| 5  | 110.0713 | 450.2096  | 432.1990       | 478.2045  | 460.1939       | H    | 1068.4720 | 1050.4614      | 9  |
| 6  | 44.0495  | 521.2467  | 503.2361       | 549.2416  | 531.2310       | A    | 931.4131  | 913.4025       | 8  |
| 7  | 159.0917 | 707.3260  | 689.3154       | 735.3209  | 717.3103       | W    | 860.3760  | 842.3654       | 7  |
| 8  | 136.0757 | 870.3893  | 852.3787       | 898.3842  | 880.3737       | Y    | 674.2967  | 656.2861       | 6  |
| 9  | 30.0338  | 927.4108  | 909.4002       | 955.4057  | 937.3951       | G    | 511.2333  | 493.2228       | 5  |
| 10 | 74.0600  | 1028.4585 | 1010.4479      | 1056.4534 | 1038.4428      | T    | 454.2119  | 436.2013       | 4  |
| 11 | 30.0338  | 1085.4799 | 1067.4694      | 1113.4748 | 1095.4643      | G    | 353.1642  |                | 3  |
| 12 | 104.0528 | 1216.5204 | 1198.5098      | 1244.5153 | 1226.5048      | M    | 296.1427  |                | 2  |
| 13 | 120.0808 |           |                |           |                | F    | 165.1022  |                | 1  |

| Seq    | ya       | yb       | Seq    | ya       | yb       | Seq    | ya       | yb       |
|--------|----------|----------|--------|----------|----------|--------|----------|----------|
| AG     | 101.0709 | 129.0659 | AGP    | 198.1237 | 226.1186 | AGPH   | 335.1826 | 363.1775 |
| AGPHA  | 406.2197 | 434.2146 | AGPHAW | 592.2990 | 620.2940 | GP     | 127.0866 | 155.0815 |
| GPH    | 264.1455 | 292.1404 | GPHA   | 335.1826 | 363.1775 | GPHAW  | 521.2619 | 549.2568 |
| GPHAWY | 684.3253 | 712.3202 | PH     | 207.1240 | 235.1190 | PHA    | 278.1612 | 306.1561 |
| PHAW   | 464.2405 | 492.2354 | PHAWY  | 627.3038 | 655.2987 | PHAWYG | 684.3253 | 712.3202 |
| HA     | 181.1084 | 209.1033 | HAW    | 367.1877 | 395.1826 | HAWY   | 530.2510 | 558.2459 |
| HAWYG  | 587.2725 | 615.2674 | HAWYGT | 688.3202 | 716.3151 | AW     | 230.1288 | 258.1237 |

|               |          |          |              |          |          |               |          |          |
|---------------|----------|----------|--------------|----------|----------|---------------|----------|----------|
| <b>AWY</b>    | 393.1921 | 421.1870 | <b>AWYG</b>  | 450.2136 | 478.2085 | <b>AWYGT</b>  | 551.2613 | 579.2562 |
| <b>AWYGTG</b> | 608.2827 | 636.2776 | <b>WY</b>    | 322.1550 | 350.1499 | <b>WYG</b>    | 379.1765 | 407.1714 |
| <b>WYGT</b>   | 480.2241 | 508.2191 | <b>WYGTG</b> | 537.2456 | 565.2405 | <b>WYGTGM</b> | 668.2861 | 696.2810 |
| <b>YG</b>     | 193.0972 | 221.0921 | <b>YGT</b>   | 294.1448 | 322.1397 | <b>YGTG</b>   | 351.1663 | 379.1612 |
| <b>YGTGM</b>  | 482.2068 | 510.2017 | <b>GT</b>    | 131.0815 | 159.0764 | <b>GTG</b>    | 188.1030 | 216.0979 |
| <b>GTGM</b>   | 319.1435 | 347.1384 | <b>TG</b>    | 131.0815 | 159.0764 | <b>TGM</b>    | 262.1220 | 290.1169 |
| <b>GM</b>     | 161.0743 | 189.0692 |              |          |          |               |          |          |

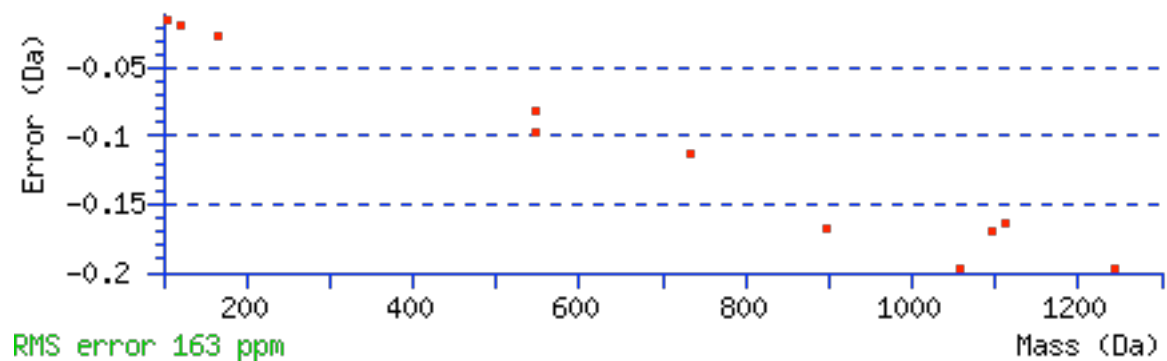

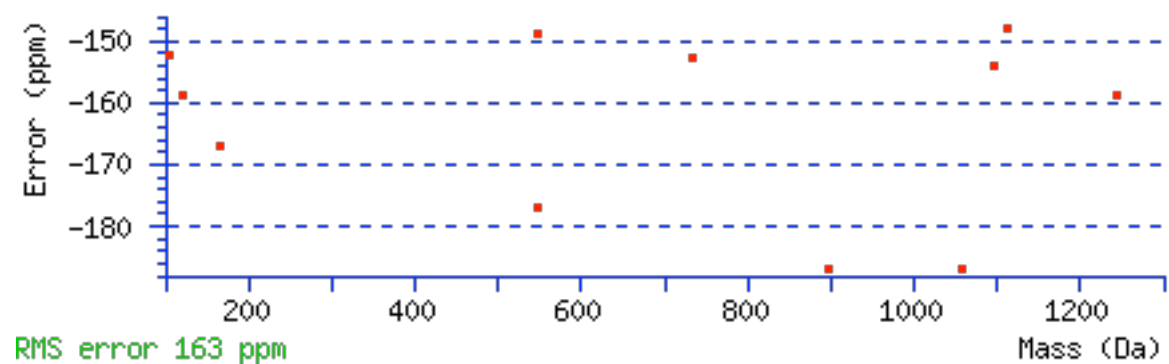

Supplement: NIHMS169991-supplement-4_si_004.pdf [file NIHMS169991-supplement-4_si_004.pdf]
