# Supplementary material
Source: PubMed Central journal article supplement (PMC2845465)
Supplement: NIHMS169991-supplement-1_si_001.pdf [file NIHMS169991-supplement-1_si_001.pdf]

Supplemental data 1:

Known or predicted (fgenesh++) neuropeptide precursors. For the predicted genes that have expression evidence, the EST identifier is included in the description line.

xxx shows the signal peptide (SignalP 3)

xxx shows the neuropeptides characterized by mass spectrometry

xxx shows the flanking (di)basic cleavage patterns

>gi|115944736|ref|XP\_001176287.1| PREDICTED: hypothetical protein [Strongylocentrotus purpuratus]

MYVNALTFPLAVAIFLVGLAILPGMLAEDGMELTHDEQPLNAMEIRSPQDEQIDLRYLLQNFLDNRDTRS  
WSPLRNSKQCIGDKCRYAWKRGFETPASSRINSRGAPAWATSQFSNGGCSGSSCLTGWKRGFRVLPQLND  
DDN

>gi|72008820|ref|XP\_785647.1| PREDICTED: similar to pedal peptide precursor protein [Strongylocentrotus purpuratus]

MKFSGNRGAFLVVNLIFVLCLVDHMAECRPAKTRDVEDLEKEEDSLINALEKVLADDEVIDNAENDS  
DDETGITDRELSLMLSMRDDVSPSRLRGYFGGKWRPAYYPSESLHVGALEPLATGFLPSRYSGQKKRFL  
TGALEPLSSGFIKKGFNTGAMEPLGSGFIKKGFNSGAMEPLGAGFFKKGFNSGAMEPLGAGFFKKGFNSG  
AMEPLGAGFFKKGFNSGAMEPLGAGFFKKGFNSGAMEPLGAGFFKKGFNSGAMEPLGAGFFKKGFNSGAM  
EPLGAGFFKKGFNSGAMEPLGSGFIKKGFNSGAMEPLGSGFIKKGFNSGAMEPLGSGFIKKGFNSGAMEP  
LGSGFIKKGFNSGAMEPLGSGFIKKGFNTGAMEPLGSGFIKKGFNSGAMEPLGSGFIKKDFNTGAMEPLG  
SGFIKKGFNSGAMEPLGAGFFKKGFHAGAMEPLSSGFIKDKRGFYNGAMEPLSAGFHQKRGFHEGEMDK  
DKKGFHNGAMEPLKSGFLKD

>gi|115839524|ref|XP\_001175944.1| PREDICTED: hypothetical protein [Strongylocentrotus purpuratus]

MQPNSIISVAVVMTLATLFTQAVCSLQFETTQDRVPAKRLFWVDKDHDPVDTDFFTVRANDAEVLDLDFV  
EVCIADFVNCAKCLFYENGNTCLPTCRHTRSICSVQCFKRYDQVSDSVH

>gi|72007133|ref|XP\_799858.1| PREDICTED: hypothetical protein [Strongylocentrotus purpuratus]

MWYVILSMLLLGALASSEYSGMSLRDRIALRNLLMNSNYDFPLAPSQRDLENTATNSKVVIPPLTFIAG  
GAGEGVQHLGAEGDIPNRQNP IPEVSSQYDNPNPCPPGGELTGKVKVYSKVHRHQVCACEKGWEAGERR  
DCSSAPKCCLPNMPNDAEFVNQYQLSERSLKNRQLFTQTRNKYSVGDKRSDHMAKSPVYKRSINSYLP  
DMVRHVSKKSAYPRTYVNPYTYNQPHLKSVAKKAPVYSGAKPIM

>gi|115933326|ref|XP\_001199000.1| PREDICTED: similar to arginine/serine-rich splicing factor 4 [Strongylocentrotus purpuratus]

MSRNAYLWAGLLLGALCLLITTSIKADGEVTEVDK RANYFRGRGRKPGKRDEPDAAALVPDDDLSEDKR  
ANMFRSRLRGKGRDDPDAAALPGDWDEEK RANMFRSRLRGNGKRDDPDAAALPGDWDEEK RANMFRSRL  
RGKGRDEPDAAALVPGDWEEEK RANMFRSRLRGKGRDDPDAAALVPGDLLSEEK RANMFRSRLRGK  
GKRDDPDAAALVPGDLLSEEK RANMFRSRLRGKGRDDPDAAALVPGGDLSEEK RANMFRSRLRGKGR  
RDDPDAAALVPGGDLSEEK RANMFRSRLRGKGRDDPDAAALVPGDWDEEK RANMFRSRLRGKGRDD  
PDAAALVGGDFGDEFVDEEK RANMFRSRLRGNGKRDDPDAAALVDEFMDEEK RANYFRGRGRRPGKRDEPDA  
ALVEDEK RANFRARQRPKLGK

>XP\_001175555 PREDICTED: hypothetical protein [Strongylocentrotus purpuratus].

MKSTVIVTLTICCLLYQTTRAASLTNRDGLSRQDILDLLQLYEPIRQEGGDKRSKGC  
FSGCMQMEVAKNRVAALLRNSNAHLFGLNGPGKRRRSVDDLPQVNDAAETE

>gi|185134999|ref|NP\_001116993.1| GnRH-like tetrapeptide [Strongylocentrotus purpuratus]

MWACILGYVTWGAALPTILGKELVLSSENDGPEIADWVQKEIPLRNQYWGDVAEEEEEEELGMLSPDSE  
KRQYPGGKRQYPGGKRQYPGGKRQYPGGKRQFPAGKRQFVGGELIPSELRQWPGGKRQWPGGKRQWPGG  
KRQYPGGKRQYPGGKRQWPEVKRQYPGGKRSEDDQDLLPMEIRQYPGGKRQWPGGKRQYPGGKRQYPGGK  
RQFPGGKRQFVGGEALEQESNINKRFAPEDDTMDFRLSQLYDTNDNIVADEGELALEDLLDDIMVDTRP  
EFEDPRDLLLGNVDQEDVLALDLALLGDRNPNGW

>gi|3328383|gb|AAC26833.1| thymosin beta [Strongylocentrotus purpuratus]  
MADKPDVSAVSSFDKTKLKTETEENKTLPTKETIEQEKTA

>gi|115666438|ref|XP\_001175484.1| PREDICTED: hypothetical protein  
[Strongylocentrotus purpuratus]  
MNSLILVVMGLLLLLTAELIPAAPAPYFDEDAMDLMDPVFNFKDDSAVKRSPMLQKSCIYTCLACSKNTQM  
TMPECIYGCQSAGRDPSPARAYNACHKYLHSGR

>gi|115963204|ref|XP\_001186882.1| PREDICTED: similar to LFRFa precursor  
[Strongylocentrotus purpuratus]  
MRVLVALALCLCFIAPSPVLSFTMPEEKFVENKMADVGEETGQNNINSIAKSLIREVFGAAEEREMAE  
NEAEDEAELSLSKRTTGSTRPQREIRARAQYAARRPPVTRSKFTFGKRSSPTPVISRPLAEQLLEELQR  
NAEMSDDWRESDKLALLNDAALYDSLVDLSDHQQVQKDAYSAFSGFKRGSASFSGKRAQPSFAFGKRGLMPS  
FAFGKRPHGGSFAFVFGRRDWAPREQDFANAAEESGPYKRGDLAFAGKREDQ

>gi|115936357|ref|XP\_001175691.1| PREDICTED: hypothetical protein  
[Strongylocentrotus purpuratus]  
MKSQVYQVVLAVLAVLVCVAWTCQAYGLDQDEYRRGAAENALDEQEIYETTESLEHAMSKRGSVKHLGLAN  
VDNWRMMKNVNRLLRNLNSGKRSDQQLDSQ

>New\_Precursor\_GSTPEDIA (3 exons, 112 aa), EST(BM322032)  
MGALVFANKREFDVGKAPLAYLIRLFDLKHEANSHREWLIIFPQKQDLAAILDQLHNTYQMARKRNFEN  
DFFLDLSLAQDFCMRKRGSSTPEDIAELVSRNRRETVDGMTDME

>New\_Precursor\_FGGANPEM (2 exons, 184 aa), EST(CD294941)  
MNNYAFLFLCLACAIGQVWTLPTIEDKDGLDIEDQEEAEKRFSGSMNMEPLVSGFYKRFSGSLDSMQSGFYKK  
NFGSGLNMEPMQSGFYKKNFGGSMEPMQSGFYKRFGGAMEPMSSGFYKRFSGSLEPMSSGFYKKNFGGS  
LEPMQSGFYKRFGGANPEMRSQFFKRFSGSLEPMSSGFYKKNFGGSLDAMQSGFYKRSQEETD

>New\_Precursor\_GYPRNSVV (2 exons, 135 aa), No EST  
MVTDTTRLLLLLAAIFSVFLACLPSLGQCFVVYEEVDVEDSENDGEWKRGYPRNSVVADPVLRSPTVTKSM  
SKYLQGLASRRFVRDPQMDKRQVNVGLRLVSMDAIRNHINQLADSRSRQKLRHNQNLMDRVGRRR

>New\_Precursor\_DAGPAWYG (2 exons, 235 aa), No EST  
MALNRLKVACCVFVYLCLALLTSAKEFSPLTGDDFAKNYDQPWGVDNPAPMNLQDPQNTFYNEADVKG  
ELDEKRGTKNDRRLRGLRRLSRLYGELGLDRLRPVKKTPETADDMYSLDDKRNDAGMPKRDAGPHAWYGTG  
MFGKRTDENRGRWRIRSPRPQPYRVGLFGKRDFETVDMNELAQIIIEAIREQQKQMQKPCITLSLLISHP  
YCYFYKYNDGDDDEDDNIVQLC

>New\_Precursor\_LPANLARE (2 exons, 44 aa), EST(EC439560)  
MELRFLLVVFLCALATSLPANLARERTTNPVLRDKDPTNNSL

>New\_Precursor\_LYDALKNA (3 exons, 98 aa), No EST  
MYHKTTTVALAVLLIALVSLSDASNYWRINKGRNARYTARSPRLYDALKNAQVKRYAGIEDVEAAEEPV  
DTWLRDWVISNRNFIRGTLFDDTYTNEV
