# Supplementary material
Source: PubMed Central journal article supplement (PMC2845465)
Supplement: NIHMS169991-supplement-2_si_002.pdf [file NIHMS169991-supplement-2_si_002.pdf]

This document contains the following supporting information:

- The Mascot search engine version 2.2.03 is used for database searching, with the following search parameters:

ESI Qtof:

Type of search : MS/MS Ion Search  
Enzyme : None  
Variable modifications : Acetyl (N-term), Gln->pyro-Glu (N-term Q), Amidated (C-term), Oxidation (M)  
Mass values : Monoisotopic  
Protein Mass : Unrestricted  
Peptide Mass Tolerance :  $\pm 0.1$  Da  
Fragment Mass Tolerance:  $\pm 0.1$  Da  
Max Missed Cleavages : 1  
Instrument type : ESI-QUAD-TOF

MALDI-TOF-TOF

Type of search : MS/MS Ion Search  
Enzyme : None  
Variable modifications : Acetyl (N-term), Gln->pyro-Glu (N-term Q), Amidated (C-term), Oxidation (M)  
Mass values : Monoisotopic  
Protein Mass : Unrestricted  
Peptide Mass Tolerance :  $\pm 0.6$  Da  
Fragment Mass Tolerance:  $\pm 0.3$  Da  
Max Missed Cleavages : 1  
Instrument type : MALDI-TOF-TOF

- PepNovo v3 (Build 20080724) determined de novo sequences, with the following arguments:

Probabilistic model : CID\_IT\_TRYP  
Peptide Mass Tolerance :  $\pm 0.1$  Da  
Fragment Mass Tolerance:  $\pm 0.1$  Da  
Digestion enzyme : none  
Spectrum Charge Correct: none  
PST length : 5  
Quality cut-off : .1
